# Supplementary material for: The microRNA-302b-inhibited insulin-like growth factor-binding protein 2 signaling pathway induces glioma cell apoptosis by targeting nuclear factor IA
Source: PubMed Central journal article supplement (PMC5360322; doi:10.1371/journal.pone.0173890), 2017-03-21
Supplement: pone.0173890.s001.pdf [file pone.0173890.s001.pdf]

**S1 Table. Primer list**

| <b>Primer name</b>              | <b>Sequence</b>                                  |
|---------------------------------|--------------------------------------------------|
| <b>For promoter cloning</b>     |                                                  |
| IGFBP2-Prom2000-F               | ATATACGCGTTCCCAAGTTGCTGGGACTACAGGCGTG            |
| IGFBP2-Prom2000-R               | ATATAGATCTCTGGCCTGACTATGACTCCTGAAGGAG            |
| <b>For promoter mutagenesis</b> |                                                  |
| IGFBP2-Prom-Mut-F               | TAGGTGGGGGCCAGGGAAAATTGGGATTATTTTAGCGGG          |
| IGFBP2-Prom-Mut-R               | CCCGCTAAAATAATCCCAATTTCCCTGGGCCCCACCTA           |
| <b>For ChIP assay</b>           |                                                  |
| IGFBP2-CHIP-F                   | GACCCCTGCAACTGAGTGTT                             |
| IGFBP2-CHIP-R                   | AACCTGGGAGCTCGTGACTA                             |
| <b>For NFIA gene cloning</b>    |                                                  |
| NFIA-clon-F                     | TATTCTAGATTATCCCAGGTACCAGGACTGTGTCTGTTGAGGGATATT |
| NFIA-clon-R                     | TATCTCGAGTTATCCCAGGTACCAGGACTGTGTCTGTTGAGGGATATT |
| <b>For real-time PCR</b>        |                                                  |
| NFIA-sybr-F                     | GCAGGCCCGAAAACGAAAATA                            |
| NFIA-sybr-R                     | TTTGCCAGAAGTCGAGATGCC                            |
| IGFBP2-sybr-F                   | TGCACATCCCCAACTGTGAC                             |
| IGFBP2-sybr-R                   | TGTAGAAGAGATGACACTCGGG                           |
| GAPDH-sybr-F                    | GTG AAG GTC GGA GTC AAC                          |
| GAPDH-sybr-R                    | GTT GAG GTC AAT GAA GGG                          |
| <b>For NFIA 3' UTR cloning</b>  |                                                  |
| NFIA-3U-1-F                     | ATTCTCGAGTTGAGCATTGAGGAGGCACATGGAGA              |
| NFIA-3U-1-R                     | ATTTCTAGATAGCTCCCCTTTTCTTGCAAGGCTGT              |
| NFIA-3U-2-F                     | ATTCTCGAGGCTCCCACACCCCATTTTTCTTAGCA              |
| NFIA-3U-2-R                     | ATTTCTAGAACATATCTTCTGAGCGGGCAGTT                 |
| NFIA-3U-3-F                     | ATTCTCGAGGTAAGGAGAGCTTCAGTGGCACCTC               |
| NFIA-3U-3-R                     | ATTTCTAGATGACCAAAAAGGCAAGGATTGAA                 |
| <b>For 3' UTR mutagenesis</b>   |                                                  |
| NFIA-3U-MUT-F                   | CATTGAAGCTATCCATAGCCACCGACTGTAGTGAATACTGTGT      |
| NFIA-3U-MUT-R                   | ACACAGTATTCACACTACAGTCGGTGGCTATGGAATAGCTTCAATG   |
