# Supplementary material for: The microRNA-302b-inhibited insulin-like growth factor-binding protein 2 signaling pathway induces glioma cell apoptosis by targeting nuclear factor IA
Source: PubMed Central journal article supplement (PMC5360322; doi:10.1371/journal.pone.0173890), 2017-03-21
Supplement: pone.0173890.s002.pdf [file pone.0173890.s002.pdf]

**S2 Table. Molecular and Cellular Functions of miR-302b-influenced genes by Ingenuity Pathway Analysis**

| Name                              | <i>p</i> -value     | Molecule numbers |
|-----------------------------------|---------------------|------------------|
| Cellular Growth and Proliferation | 4.03E-20 - 2.76E-03 | 174              |
| Cell Death and Survival           | 4.08E-20 - 2.70E-03 | 171              |
| Cellular Development              | 3.19E-15 - 2.76E-03 | 138              |
| Gene Expression                   | 4.44E-14 - 9.19E-04 | 127              |
| Cellular Movement                 | 2.49E-13 - 2.76E-03 | 106              |
