# Supplementary material for: The microRNA-302b-inhibited insulin-like growth factor-binding protein 2 signaling pathway induces glioma cell apoptosis by targeting nuclear factor IA
Source: PubMed Central journal article supplement (PMC5360322; doi:10.1371/journal.pone.0173890), 2017-03-21
Supplement: pone.0173890.s003.pdf [file pone.0173890.s003.pdf]

**S3 Table. The 34 non-direct targets of miR-302b-downregulated genes**

| <b>Symbol</b> | <b>Log2(ratio)</b> | <b>p-value</b> | <b>Description</b>                                                     | <b>Function</b>                                                                  |
|---------------|--------------------|----------------|------------------------------------------------------------------------|----------------------------------------------------------------------------------|
| CDH18         | -1.86              | 9.37E-15       | Cadherin 18, Type 2                                                    | synaptic adhesion, axon outgrowth and guidance                                   |
| LRRC17        | -1.86              | 7.2E-14        | Leucine Rich Repeat Containing 17                                      | bone homeostasis                                                                 |
| CXXC5         | -1.51              | 2.1E-15        | CXXC Finger Protein 5                                                  | Transcription factor                                                             |
| MT4           | -1.44              | 7.99E-08       | Metallothionein 4                                                      | zinc metabolism                                                                  |
| FABP7         | -1.41              | 4.38E-08       | Fatty Acid Binding Protein 7                                           | establishment of the radial glial fiber system                                   |
| PCYT2         | -1.41              | 9.92E-11       | Phosphate Cytidylyltransferase 2, Ethanolamine                         | biosynthesis of the phospholipid phosphatidylethanolamine                        |
| GAMT          | -1.39              | 2.45E-11       | Guanidinoacetate N-Methyltransferase                                   | synthesis of creatine from guanidinoacetate and S-adenosylmethionine             |
| CHST1         | -1.37              | 2.96E-08       | Carbohydrate (Keratan Sulfate Gal-6) Sulfotransferase 1                | biosynthesis of selectin ligands                                                 |
| RTKN2         | -1.36              | 1.34E-10       | Rhotekin 2                                                             | lymphopoiesis                                                                    |
| ID3           | -1.29              | 2.34E-09       | Inhibitor of DNA Binding 3, Dominant Negative Helix-Loop-Helix Protein | negatively regulates the basic helix-loop-helix transcription factors activities |
| PML           | -1.22              | 1.38E-08       | Promyelocytic Leukemia                                                 | association with PML-nuclear bodies                                              |
| NDP           | -1.18              | 1.71E-05       | Norrie Disease (Pseudoglioma)                                          | retinal developmental vasculogenesis                                             |
| GUCY1B3       | -1.17              | 5.64E-09       | Guanylate Cyclase 1, Soluble, Beta 3                                   | biosynthesis of the signaling molecule cGMP                                      |
| HMGN3         | -1.15              | 0.0005         | High Mobility Group Nucleosomal Binding Domain 3                       | regulating chromatin structure                                                   |
| LOXL1         | -1.15              | 2.32E-06       | Lysyl Oxidase-Like 1                                                   | Active on elastin and collagen substrates                                        |
| RNF112        | -1.15              | 1.94E-07       | Ring Finger Protein 112                                                | GTPase activity                                                                  |
| LMNB1         | -1.14              | 1.01E-08       | Lamin B1                                                               | components of the nuclear lamina                                                 |
| AS3MT         | -1.13              | 7.49E-10       | Arsenite Methyltransferase                                             | methylates arsenite to form methylarsonate                                       |
| ENC1          | -1.12              | 3.53E-08       | Ectodermal-Neural Cortex 1                                             | differentiation of neural crest cells                                            |
| IL11RA        | -1.11              | 1.49E-07       | Interleukin 11 Receptor, Alpha                                         | development of craniofacial bones and teeth                                      |
| FBN1          | -1.09              | 1.4E-06        | Fibrillin 1                                                            | maintenance of elastic fibers and anchoring epithelial cells                     |

|        |       |          |                                                                      |                                                                                       |
|--------|-------|----------|----------------------------------------------------------------------|---------------------------------------------------------------------------------------|
|        |       |          |                                                                      | to the interstitial matrix                                                            |
| CNIH3  | -1.08 | 1.76E-05 | Cornichon Family AMPA Receptor Auxiliary Protein 3                   | Regulates the trafficking and gating properties of AMPA-selective glutamate receptors |
| IDH1   | -1.08 | 1.62E-07 | Isocitrate Dehydrogenase 1 (NADP+), Soluble                          | third step of citric acid cycle                                                       |
| RDM1   | -1.07 | 0.000519 | RAD52 Motif Containing 1                                             | resistance to the cisplatin                                                           |
| PODXL  | -1.07 | 1.64E-08 | Podocalyxin-Like                                                     | egulation of cell adhesion and morphology                                             |
| GLI1   | -1.07 | 8.58E-05 | GLI Family Zinc Finger 1                                             | transcriptional activator                                                             |
| FDFT1  | -1.06 | 2.29E-08 | Farnesyl-Diphosphate Farnesyltransferase 1                           | Farnesyltransferase                                                                   |
| IGFBP2 | -1.05 | 1.62E-05 | Insulin-Like Growth Factor Binding Protein 2                         | regulator of somatic growth and cellular proliferation                                |
| CFI    | -1.03 | 2.52E-07 | Complement Factor I                                                  | Inactivates complement subcomponents C3b, iC3b and C4b                                |
| OGG1   | -1.03 | 8.37E-08 | 8-Oxoguanine DNA Glycosylase                                         | repair of oxidative DNA damage                                                        |
| ITGA3  | -1.02 | 1.9E-07  | Integrin, Alpha 3 (Antigen CD49C, Alpha 3 Subunit Of VLA-3 Receptor) | cell surface adhesion receptor                                                        |
| TTL1   | -1.02 | 4.34E-07 | Tubulin Tyrosine Ligase-Like Family Member 1                         | Catalytic subunit of the neuronal tubulin polyglutamylase complex                     |
| GNG2   | -1.02 | 0.000574 | Guanine Nucleotide Binding Protein (G Protein), Gamma 2              | modulator in various transmembrane signaling systems                                  |
| SNAP25 | -1.01 | 1.4E-07  | Podocalyxin-Like                                                     | molecular regulation of neurotransmitter release                                      |
