# Supplementary material for: The microRNA-302b-inhibited insulin-like growth factor-binding protein 2 signaling pathway induces glioma cell apoptosis by targeting nuclear factor IA
Source: PLoS One. 2017 Mar 21;12(3):e0173890. doi: 10.1371/journal.pone.0173890 (PMC5360322; doi:10.1371/journal.pone.0173890)
Supplement: S1 Array Data — (XLSX) [file pone.0173890.s007.xlsx]

## Sheet: Raw Data
		Raw Intensity				P-value (Detected)				Flags				P-value (Detected)		Normalized Intensity		CV		log2 (Ratio)	P-value (Differentially expressed)
Gene_symbol	ID	control-1	control-2	miR-302b-1	miR-302b-2	control-1	control-2	miR-302b-1	miR-302b-2	control-1	control-2	miR-302b-1	miR-302b-2	control	miR-302b	control	miR-302b	control	miR-302b	miR-302b/control	miR-302b/control	Description	RefSeq
IL8	PH_hs_0000069	143	231	15403	23249	0.000130439	2.84665e-05	3.18186e-07	3.07228e-07	0	0	0	0	3.95559e-08	3.09064e-09	185.269	19311.9	0.186249	0.172064	6.15287	2.18758e-19	interleukin 8	NM_000584.3
PTGS2	PH_hs_0011595	147	185	13240	14426	0.000120917	5.67115e-05	3.59341e-05	3.20419e-07	0	0	0	0	1.27976e-15	4.5993e-24	165.464	13831	0.126411	0.0995038	5.89883	3.07789e-21	prostaglandin-endoperoxide synthase 2 (prostaglandin G/H synthase and cyclooxygenase)	NM_000963.2
FOS	PH_hs_0002259	157	178	8422	8357	9.56498e-05	6.37331e-05	3.46498e-07	3.47001e-07	0	0	0	0	7.59602e-24	7.5317e-41	167.392	8389.73	0.0999969	0.075007	5.13589	3.72649e-38	FBJ murine osteosarcoma viral oncogene homolog	NM_005252.3
CXCL2	PH_hs_0043263	365	620	20006	20990	7.96713e-06	2.54331e-06	3.10678e-07	3.09513e-07	0	0	0	0	4.13485e-08	3.16213e-35	487.362	20496.5	0.186527	0.0811097	4.9162	2.52613e-20	chemokine (C-X-C motif) ligand 2	NM_002089.3
IL1B	PH_hs_0007166	2907	2682	65507	65505	4.89332e-07	5.10888e-07	2.93816e-07	2.93819e-07	0	0	0	0	8.52322e-18	1.91978e-43	2807.05	65506.9	0.117477	0.072619	4.19503	3.37333e-24	interleukin 1, beta	NM_000576.2
RN7SK	PH_hs_0046245	78	143	2429	2856	0.00113016	0.000130327	5.40887e-07	4.93828e-07	0	0	0	0	6.47339e-06	1.15679e-19	109.153	2641.75	0.229305	0.111145	4.06894	1.21543e-13	RNA, 7SK small nuclear	NR_001445.2
IL1RN	PH_hs_0004656	195	239	5230	4940	4.96914e-05	2.55182e-05	3.8819e-07	3.94765e-07	0	0	0	0	1.6716e-18	2.031e-30	216.441	5085.6	0.114953	0.0876999	4.017	1.0195e-27	interleukin 1 receptor antagonist	NM_173842.2,NM_173843.2,NM_173841.2,NM_000577.4
SERPINB2	PH_hs_0061173	2112	2663	48083	48221	5.92154e-07	5.12802e-07	2.96449e-07	2.96421e-07	0	0	0	0	1.52601e-21	2.94273e-44	2379.68	48152.4	0.105698	0.0719189	3.94166	5.52236e-31	serpin peptidase inhibitor, clade B (ovalbumin), member 2	NM_001143818.1,NM_002575.2
SERPINB2	PH_hs_0004364	4227	3577	63103	65506	4.16034e-07	4.44154e-07	2.94092e-07	2.95819e-07	0	0	0	0	2.79788e-13	1.20158e-37	3927.9	64301	0.138697	0.0783069	3.69538	5.65533e-19	serpin peptidase inhibitor, clade B (ovalbumin), member 2	NM_001143818.1,NM_002575.2
CXCL3	PH_hs_0005014	227	249	4153	4775	2.97159e-05	0.0239015	4.22085e-07	3.9904e-07	0	0	0	0	1.05315e-12	7.41847e-22	238.042	4462.92	0.142303	0.104865	3.67607	2.33858e-26	chemokine (C-X-C motif) ligand 3	NM_002090.2
IGFBP1	PH_hs_0019089	129	155	2399	2698	0.000183907	0.000100246	5.44987e-07	5.09118e-07	0	0	0	0	1.24683e-17	7.86988e-24	141.704	2547.99	0.11809	0.100032	3.6253	7.13824e-28	insulin-like growth factor binding protein 1	NM_000596.2
ATF3	PH_hs_0000057	823	959	12950	15522	1.61198e-06	1.40786e-06	7.96573e-07	3.17927e-07	0	0	0	0	1.46633e-29	2.79685e-18	889.82	14231.5	0.0890539	0.115733	3.50824	1.42543e-25	activating transcription factor 3	NM_001206488.2,NM_001206486.2,NM_001206484.2,NM_001040619.2,NM_001030287.3,NM_001674.3
C11orf96	PH_hs_0061402	200	183	3103	3367	4.39149e-05	5.81846e-05	4.73678e-07	4.56028e-07	0	0	0	0	2.2863e-13	1.40924e-28	192.399	3234.56	0.138171	0.0906831	3.50586	7.5219e-20	chromosome 11 open reading frame 96	NM_001145033.1
LIF	PH_hs_0030881	138	185	2231	2294	0.000147596	0.0575494	5.70567e-07	6.04718e-07	0	0	0	0	8.89177e-06	4.92432e-38	160.729	2262.42	0.233044	0.0778845	3.26548	3.21317e-22	leukemia inhibitory factor	NM_001257135.1,NM_002309.4
NFKBIZ	PH_hs_0024529	369	435	5412	5635	8.19167e-06	5.69364e-06	3.84134e-07	3.79803e-07	0	0	0	0	5.71093e-25	2.40168e-36	401.352	5523.17	0.0975284	0.0797766	3.26191	1.2298e-33	nuclear factor of kappa light polypeptide gene enhancer in B-cells inhibitor, zeta	NM_001005474.2,NM_031419.3
MMP1	PH_hs_0004751	1481	1976	22299	22390	7.87293e-07	6.24939e-07	3.08131e-07	3.0804e-07	0	0	0	0	5.54597e-17	1.68156e-44	1720.44	22344.6	0.120591	0.0717229	3.24884	3.29675e-24	matrix metallopeptidase 1 (interstitial collagenase)	NM_001145938.1,NM_002421.3
TNFAIP3	PH_hs_0012275	453	532	6433	6065	4.86692e-06	0.00036355	3.67013e-07	3.7247e-07	0	0	0	0	2.60185e-20	3.20039e-30	491.752	6249.76	0.109174	0.0880059	3.15117	1.58531e-25	tumor necrosis factor, alpha-induced protein 3	NM_001270508.1,NM_001270507.1,NM_006290.3
IL1A	PH_hs_0000235	89	110	1252	1277	0.000635469	0.00182426	9.31622e-07	9.79134e-07	0	0	0	0	2.40552e-12	1.54674e-38	99.2232	1264.47	0.144696	0.0773463	3.14903	1.2019e-24	interleukin 1, alpha	NM_000575.3
SLC7A5	PH_hs_0010871	153	153	1809	2026	0.000105842	0.000104237	6.63205e-07	6.09299e-07	0	0	0	0	4.9319e-17	4.76897e-24	153.38	1917.13	0.120389	0.0995391	3.0779	1.51084e-20	solute carrier family 7 (amino acid transporter light chain, L system), member 5	NM_003486.5
TFPI2	PH_hs_0060541	466	561	5491	6301	4.50059e-06	3.15642e-06	3.82561e-07	3.68948e-07	0	0	0	0	1.19792e-23	3.85062e-22	512.405	5894.59	0.100451	0.104125	3.00467	3.7741e-24	tissue factor pathway inhibitor 2	NM_001271004.1,NM_001271003.1,NM_006528.3
CLDN14	PH_hs_0030595	1604	1857	18647	19247	7.3267e-07	6.56325e-07	3.12494e-07	3.11659e-07	0	0	0	0	2.83297e-32	7.79595e-39	1728.49	18946.2	0.0849719	0.077033	2.9973	3.10373e-32	claudin 14	NM_001146077.1,NM_012130.3,NM_001146078.2,NM_001146079.1,NM_144492.2
SOD2	PH_hs_0024363	187	262	2346	2526	5.43443e-05	1.94637e-05	5.52557e-07	5.28467e-07	0	0	0	0	6.62225e-12	1.76027e-29	223.187	2435.7	0.147799	0.0891822	2.88155	4.52039e-18	superoxide dismutase 2, mitochondrial	NM_000636.2
SLC16A6	PH_hs_0061888	88	102	946	961	0.000659498	0.000406405	1.30573e-06	1.27886e-06	0	0	0	0	3.465e-17	1.40786e-38	94.8866	953.485	0.119786	0.0773031	2.8037	6.49192e-25	solute carrier family 16, member 6 (monocarboxylic acid transporter 7)	NM_001174166.1,NM_004694.4
CXCL1	PH_hs_0030857	44	76	682	661	0.00886543	0.467496	2.149e-06	2.76113e-06	-50	0	0	0	0.397521	7.18971e-31	59.3508	671.548	3.84959	0.0870128	2.71529	0.23617	chemokine (C-X-C motif) ligand 1 (melanoma growth stimulating activity, alpha)	NR_046035.1,NM_001511.3
CXCL1	PH_hs_0028689	256	274	2434	2713	2.21911e-05	0.00177313	5.42593e-07	5.09891e-07	0	0	0	0	3.64613e-19	7.53237e-25	265.209	2573.02	0.112735	0.0977838	2.70245	7.63002e-21	chemokine (C-X-C motif) ligand 1 (melanoma growth stimulating activity, alpha)	NR_046035.1,NM_001511.3
SLC7A11	PH_hs_0048259	578	850	5989	6680	2.89653e-06	2.13678e-05	3.73663e-07	3.63743e-07	0	0	0	0	6.05339e-11	2.98978e-25	708.988	6333.32	0.155328	0.0969389	2.64857	6.22415e-15	solute carrier family 7 (anionic amino acid transporter light chain, xc- system), member 11	NM_014331.3
SOD2	PH_hs_0044715	7848	8457	61281	65506	3.51261e-07	3.46229e-07	2.94316e-07	2.93816e-07	0	0	0	0	2.04129e-38	8.40541e-32	8157.55	63386.6	0.0774742	0.0856422	2.64607	1.26136e-23	superoxide dismutase 2, mitochondrial	NM_001024466.1,NM_001024465.1,NM_000636.2
CTGF	PH_hs_0024819	113	156	1194	1265	0.00028689	9.80135e-05	9.81419e-07	1.37231e-06	0	0	0	0	4.33009e-11	1.54584e-30	133.761	1229.39	0.154115	0.0875178	2.64004	1.05731e-14	connective tissue growth factor	NM_001901.2
CCL20	PH_hs_0004333	633	632	5741	5416	2.44762e-06	8.73267e-05	3.77884e-07	5.04854e-06	0	0	0	0	8.55091e-20	8.6305e-28	634.095	5579.17	0.110737	0.092054	2.62184	7.0532e-15	chemokine (C-C motif) ligand 20	NM_001130046.1,NM_004591.2
ZC3H12A	PH_hs_0043363	231	318	2160	2571	4.82711e-05	1.1368e-05	5.82935e-07	5.23081e-07	0	0	0	0	8.38092e-13	1.16048e-18	273.011	2364.78	0.141662	0.11441	2.54083	4.16728e-15	zinc finger CCCH-type containing 12A	NM_025079.2
IL11	PH_hs_0000234	205	256	1915	1948	4.0662e-05	0.224845	6.35624e-07	6.26885e-07	0	0	0	0	0.00484368	1.92286e-40	229.8	1931.47	0.386579	0.0754035	2.51878	2.22226e-10	interleukin 11	NM_000641.3,NM_001267718.1
SESN2	PH_hs_0000852	1775	1927	14196	12211	6.73495e-07	6.31934e-07	3.20992e-07	2.21201e-05	0	0	0	0	1.84587e-38	9.22853e-18	1851.8	13207.3	0.0774278	0.117604	2.38295	3.64272e-12	sestrin 2	NM_031459.4
EGR1	PH_hs_0016176	1395	1587	10878	10285	8.33804e-07	7.39498e-07	3.32556e-07	3.34935e-07	0	0	0	0	2.40444e-35	7.11011e-31	1489.91	10582.7	0.0809649	0.0870056	2.35166	6.05494e-20	early growth response 1	NM_001964.2
IRS2	PH_hs_0048588	93	159	807	1111	0.000549855	9.18959e-05	1.64187e-06	1.06613e-06	0	0	0	0	8.10566e-07	3.57678e-11	124.667	958.456	0.20852	0.153435	2.34645	3.45179e-07	insulin receptor substrate 2	NM_003749.2
FOSB	PH_hs_0004361	92	99	702	693	0.000731897	0.000446143	2.04535e-06	2.09083e-06	0	0	0	0	2.29315e-18	1.24726e-34	95.5625	697.526	0.115431	0.0818471	2.33881	1.05186e-17	FBJ murine osteosarcoma viral oncogene homolog B	NM_001114171.1,NM_006732.2
STC2	PH_hs_0009352	294	340	2366	2298	1.4059e-05	9.53876e-06	5.49644e-07	5.59789e-07	0	0	0	0	3.19338e-26	9.76324e-35	316.64	2332.16	0.0949806	0.0817141	2.31136	2.59664e-20	stanniocalcin 2	NM_003714.2
DKK1	PH_hs_0003037	1410	1804	10700	11134	8.25013e-07	6.64634e-07	3.32941e-07	3.31024e-07	0	0	0	0	5.86722e-20	8.03594e-37	1601.16	10916.4	0.110235	0.0792298	2.30084	4.04694e-21	dickkopf 1 homolog (Xenopus laevis)	NM_012242.2
NR4A3	PH_hs_0023415	164	148	1149	1172	8.30118e-05	0.000116376	0.000110577	1.00203e-06	0	0	0	0	3.29053e-12	8.97105e-30	156.786	1160.47	0.145635	0.0887115	2.29807	2.78865e-08	nuclear receptor subfamily 4, group A, member 3	NM_173200.2,NM_006981.3
ADAMTS5	PH_hs_0003748	391	458	3293	2835	6.73115e-06	4.67476e-06	4.60638e-07	5.12974e-07	0	0	0	0	3.82744e-26	1.59684e-19	423.883	3064.88	0.0951348	0.111585	2.29081	9.48964e-15	ADAM metallopeptidase with thrombospondin type 1 motif, 5	NM_007038.3
DNAJB9	PH_hs_0000684	190	277	1665	1701	0.000243904	1.66e-05	7.09569e-07	6.9699e-07	0	0	0	0	2.75934e-10	4.71618e-39	231.91	1682.96	0.161197	0.0768056	2.27991	1.86707e-12	DnaJ (Hsp40) homolog, subfamily B, member 9	NM_012328.2
CCL3L3|CCL3|CCL3L1|LOC101060267	PH_hs_0062053	120	139	889	956	0.000234488	0.000143695	1.42255e-06	1.28779e-06	0	0	0	0	1.10832e-19	5.5259e-28	129.348	922.39	0.111087	0.091711	2.27715	1.15946e-21	chemokine (C-C motif) ligand 3-like 3|chemokine (C-C motif) ligand 3|chemokine (C-C motif) ligand 3-like 1|c-C motif chemokine 3-like	NM_001001437.3|NM_002983.2|NM_021006.4|XM_003960672.1
GADD45B	PH_hs_0027209	2230	2419	14915	15545	5.81766e-07	5.42234e-07	3.19259e-07	3.1788e-07	0	0	0	0	1.08969e-38	1.43964e-36	2325.56	15229.1	0.0771857	0.0795196	2.25679	9.85737e-21	growth arrest and DNA-damage-inducible, beta	NM_015675.3
CBS	PH_hs_0022824	80	88	593	565	0.00107072	0.00106489	2.75957e-06	3.0261e-06	0	0	0	0	3.81696e-18	7.21879e-28	84.009	579.059	0.116212	0.0919161	2.25348	8.48079e-16	cystathionine-beta-synthase	NM_001178009.1,NM_001178008.1,NM_000071.2
TXNRD1	PH_hs_0025324	1346	2429	11672	12134	8.63925e-07	5.40899e-07	3.28869e-07	3.27161e-07	0	0	0	0	1.5154e-07	4.64979e-37	1865.17	11902.3	0.195254	0.0789608	2.20811	8.26876e-09	thioredoxin reductase 1	NM_001261446.1,NM_001261445.1,NM_003330.3,NM_182743.2,NM_182729.2,NM_182742.2,NM_001093771.2
ADAMTS5	PH_hs_0047229	681	796	4718	5003	2.15326e-06	1.67267e-06	4.00598e-07	3.93211e-07	0	0	0	0	1.26643e-28	1.22222e-32	737.465	4860.04	0.0906041	0.0844643	2.19825	1.34287e-24	ADAM metallopeptidase with thrombospondin type 1 motif, 5	NM_007038.3
EDN1	PH_hs_0026662	160	180	1217	1127	9.57871e-05	6.34e-05	9.60881e-07	1.04841e-06	0	0	0	0	1.00627e-24	5.67539e-26	169.923	1172.18	0.0980531	0.0954728	2.19413	3.57566e-16	endothelin 1	NM_001955.4,NM_001168319.1
TSPY1|TSPY2|TSPY10|TSPY8|TSPY3|TSPY4	PH_hs_0062193	135	196	1069	1159	0.000157773	0.00687802	1.11651e-06	0.00412712	0	0	0	0	2.14973e-07	4.32505e-15	164.389	1113.85	0.197816	0.128905	2.17709	1.3219e-05	testis specific protein, Y-linked 1|testis specific protein, Y-linked 2|testis specific protein, Y-linked 10|testis specific protein, Y-linked 8|testis specific protein, Y-linked 3|testis specific protein, Y-linked 4	NM_001197242.1,NM_003308.3|NM_022573.2|XM_003403496.1,XM_002344198.3|NM_001243721.1|NM_001077697.2|NM_001164471.1
CXCL5	PH_hs_0005016	323	411	2459	2386	1.09068e-05	0.00687281	5.36923e-07	5.46805e-07	0	0	0	0	9.26536e-11	1.34793e-34	365.716	2422.67	0.156911	0.0818894	2.17052	6.07173e-16	chemokine (C-X-C motif) ligand 5	NM_002994.3
LIMS3|LIMS3L	PH_hs_0028584	193	248	1438	1549	4.92267e-05	2.28248e-05	8.09544e-07	0.181842	0	0	0	0	1.29516e-15	0.000533807	219.676	1493.32	0.126435	0.305617	2.15989	4.95558e-18	LIM and senescent cell antigen-like domains 3|LIM and senescent cell antigen-like domains 3-like	NM_033514.4|NM_001205288.1
IFIT3	PH_hs_0010750	196	240	1313	1551	4.7374e-05	2.51951e-05	8.86432e-07	7.54696e-07	0	0	0	0	1.28443e-18	7.02708e-19	217.444	1431.58	0.11456	0.113675	2.1251	1.00566e-14	interferon-induced protein with tetratricopeptide repeats 3	NM_001549.4,NM_001031683.2
TRIB3	PH_hs_0023894	308	352	2119	2130	1.23855e-05	1.33599e-05	5.90529e-07	5.88447e-07	0	0	0	0	1.55366e-27	1.11543e-42	329.722	2124.51	0.0925122	0.0732989	2.11942	3.01226e-20	tribbles homolog 3 (Drosophila)	NM_021158.3
TIPARP	PH_hs_0061644	88	87	557	543	0.000663425	0.0006955	3.11167e-06	3.27363e-06	0	0	0	0	2.35349e-13	3.46802e-31	87.7421	550.033	0.138246	0.08654	2.11473	1.87435e-12	TCDD-inducible poly(ADP-ribose) polymerase	NM_001184717.1,NM_001184718.1,NM_015508.4
ASNS	PH_hs_0026107	3038	3724	19549	19551	4.78598e-07	4.36793e-07	3.60758e-07	3.11256e-07	0	0	0	0	1.03272e-24	4.55422e-43	3372.28	19550.3	0.0980774	0.0729506	2.10693	3.61613e-20	asparagine synthetase (glutamine-hydrolyzing)	NM_001178077.1,NM_001178076.1,NM_001178075.1,NM_133436.3,NM_183356.3,NM_001673.4
ZIC2	PH_hs_0024092	290	278	1754	1894	1.46129e-05	1.64266e-05	3.7901e-05	6.40858e-07	0	0	0	0	5.10163e-17	1.49841e-24	285.004	1823.77	0.120447	0.0984271	2.09582	1.95798e-09	Zic family member 2	NM_007129.3
GREM1	PH_hs_0028864	439	548	2924	3223	5.14193e-06	3.21291e-06	4.87866e-07	6.82056e-07	0	0	0	0	4.22844e-20	4.71341e-26	492.006	3072.99	0.109804	0.095313	2.09422	4.55378e-17	gremlin 1	NM_001191323.1,NM_001191322.1,NM_013372.6
DUSP1	PH_hs_0010276	3784	4422	22112	23830	4.33977e-07	4.09429e-07	4.87733e-06	3.06711e-07	0	0	0	0	1.18482e-31	9.89664e-28	4097.27	22968.2	0.0858571	0.0921601	2.0758	2.80526e-17	dual specificity phosphatase 1	NM_004417.3
MAP3K8	PH_hs_0025239	23	85	450	497	0.123556	0.00073872	4.90096e-06	5.73108e-06	-50	0	0	0	0.00952697	1.94792e-22	52.5876	473.42	0.426535	0.103372	2.03691	1.54725e-16	mitogen-activated protein kinase kinase kinase 8	NM_001244134.1,NM_005204.3
NR4A2	PH_hs_0061474	138	117	757	798	0.000149702	0.000254863	0.00434631	1.66688e-06	0	0	0	0	8.32026e-10	2.91426e-17	128.34	777.435	0.165903	0.119494	2.03319	8.56126e-05	nuclear receptor subfamily 4, group A, member 2	NM_006186.3
MALAT1	PH_hs_0037472	1025	1358	5982	6935	1.23616e-06	0.343895	1.38684e-06	3.60619e-07	0	0	0	0	0.0840468	1.39193e-20	1186.15	6456.84	0.725502	0.108378	2.02767	0.000146309	metastasis associated lung adenocarcinoma transcript 1 (non-protein coding)	NR_002819.2
NAMPT	PH_hs_0043284	181	276	1312	1462	6.02809e-05	1.67989e-05	8.86884e-07	8.00792e-07	0	0	0	0	1.5055e-09	3.13161e-24	226.698	1386.74	0.168606	0.0991308	2.02353	1.77055e-09	nicotinamide phosphoribosyltransferase	NM_005746.2
ZBTB21	PH_hs_0061012	92	82	481	546	0.000572904	0.00090854	4.20275e-06	3.23631e-06	0	0	0	0	6.28488e-10	1.91384e-20	87.4654	513.388	0.164669	0.108781	2.01333	2.47011e-09	zinc finger and BTB domain containing 21	NM_001098403.1,NM_001098402.1,NM_020727.4
CITED1	PH_hs_0043744	107	110	634	633	0.000344257	0.000316151	2.44164e-06	2.44775e-06	0	0	0	0	1.15889e-16	1.69371e-36	108.695	633.51	0.121886	0.079601	2.00739	1.3159e-13	Cbp/p300-interacting transactivator, with Glu/Asp-rich carboxy-terminal domain, 1	NM_001144887.1,NM_001144886.1,NM_001144885.1,NM_004143.3
DUSP8|GLUD1P3	PH_hs_0026661	275	283	1680	1669	3.93245e-05	4.14137e-05	7.04189e-07	7.08143e-07	0	0	0	0	6.61845e-21	4.44023e-39	279.493	1674.54	0.107454	0.0767785	1.99655	2.54709e-14	dual specificity phosphatase 8|glutamate dehydrogenase 1 pseudogene 3	NM_004420.2|NR_048575.1
C10orf2	PH_hs_0001988	90	115	594	575	0.000650764	0.00027374	2.75197e-06	2.92691e-06	0	0	0	0	1.02528e-12	2.64713e-30	102.131	584.543	0.142227	0.0878778	1.981	3.94701e-12	chromosome 10 open reading frame 2	NM_001163813.1,NM_001163812.1,NM_021830.4,NM_001163814.1
RRAD	PH_hs_0000132	60	131	671	751	0.0315458	0.000174739	2.21471e-06	1.83191e-06	-50	0	0	0	0.000329641	1.47694e-22	93.9661	710.863	0.293602	0.103071	1.97385	6.48959e-17	Ras-related associated with diabetes	NM_001128850.1,NM_004165.2
RCAN1	PH_hs_0023445	1501	1683	8364	8810	7.77813e-07	7.03136e-07	3.46948e-07	3.43655e-07	0	0	0	0	1.01382e-38	3.36881e-34	1591.41	8586.3	0.0771527	0.0823938	1.95388	1.48262e-19	regulator of calcineurin 1	NM_203417.1,NM_004414.5,NM_203418.1
LINC00161	PH_hs_0025674	90	98	505	546	0.000612203	0.000481898	3.7921e-06	3.23762e-06	0	0	0	0	1.96093e-19	1.61439e-25	94.0338	525.432	0.111867	0.0963874	1.95004	1.32122e-15	long intergenic non-protein coding RNA 161	NR_026553.1,NR_026552.1
PPP1R15A	PH_hs_0004421	457	500	2770	2644	4.7598e-06	3.87155e-06	5.01877e-07	5.16246e-07	0	0	0	0	1.3205e-34	1.11908e-31	478.615	2707.27	0.0818782	0.0858213	1.94362	4.2019e-15	protein phosphatase 1, regulatory subunit 15A	NM_014330.3
NUPR1	PH_hs_0025101	1893	2435	11255	11383	6.40371e-07	5.40071e-07	3.30516e-07	3.29994e-07	0	0	0	0	9.6388e-20	4.76441e-44	2155.85	11318.9	0.110898	0.0720943	1.93197	9.19801e-17	nuclear protein, transcriptional regulator, 1	NM_001042483.1,NM_012385.2
ETS2	PH_hs_0023540	1481	1611	8043	8394	7.87277e-07	7.29836e-07	3.49561e-07	3.46716e-07	0	0	0	0	1.69533e-38	4.56119e-36	1546.6	8217.97	0.0773885	0.0801022	1.92839	1.24636e-17	v-ets erythroblastosis virus E26 oncogene homolog 2 (avian)	NM_001256295.1,NM_005239.5
BRI3	PH_hs_0045995	112	191	895	962	0.247907	6.7302e-05	1.40889e-06	1.27791e-06	0	0	0	0	0.00691321	4.5627e-28	149.906	928.39	0.406216	0.0915648	1.92734	0.000103306	brain protein I3	NM_001159491.1
DDIT3	PH_hs_0033101	10323	11463	52819	51577	3.34754e-07	3.2988e-07	2.95559e-07	2.95777e-07	0	0	0	0	1.09301e-43	2.14435e-37	10891.6	52201	0.0724035	0.0785848	1.92485	2.64946e-17	DNA-damage-inducible transcript 3	NM_001195057.1,NM_004083.5,NM_001195056.1,NM_001195055.1,NM_001195054.1,NM_001195053.1
BCL6	PH_hs_0009331	337	457	2044	2306	9.80588e-06	4.69762e-06	6.05491e-07	5.58565e-07	0	0	0	0	2.22961e-14	2.29946e-23	394.992	2174.55	0.132506	0.101112	1.89849	1.31566e-12	B-cell CLL/lymphoma 6	NM_001706.4,NM_001134738.1,NM_001130845.1
MAP1LC3B2	PH_hs_0049709	289	485	2339	1921	1.55788e-05	4.1282e-06	5.54876e-07	6.33366e-07	0	0	0	0	3.6603e-08	3.65649e-16	383.072	2130.79	0.185766	0.12399	1.89237	1.11161e-06	microtubule-associated protein 1 light chain 3 beta 2	NM_001085481.1
KRT34|LOC100653049	PH_hs_0029669	116	131	646	696	0.000262585	0.0648577	2.36044e-06	2.07507e-06	0	0	0	0	4.3922e-08	8.23613e-27	123.432	670.917	0.186908	0.0938501	1.88887	3.88359e-11	keratin 34|keratin, type I cuticular Ha4-like	NM_021013.3|XM_003403882.2
IRAK2	PH_hs_0048257	929	1027	5131	5173	1.34072e-06	1.17411e-06	3.90194e-07	4.17585e-07	0	0	0	0	1.43238e-40	2.52234e-44	977.983	5151.99	0.0752783	0.0718681	1.88224	3.37127e-18	interleukin-1 receptor-associated kinase 2	NM_001570.3
SRXN1	PH_hs_0008141	330	673	2316	3133	1.03092e-05	2.19735e-06	5.57059e-07	4.71503e-07	0	0	0	0	7.13552e-06	3.99514e-12	494.19	2723.04	0.230433	0.146226	1.8774	4.02797e-05	sulfiredoxin 1	NM_080725.2
ALDH1A3	PH_hs_0042020	919	1493	5100	7641	1.35808e-06	7.81386e-07	3.90913e-07	3.55925e-07	0	0	0	0	2.35788e-09	2.34092e-09	1194.68	6365.93	0.170739	0.170704	1.86197	5.17787e-06	aldehyde dehydrogenase 1 family, member A3	NM_000693.2
TFPI2	PH_hs_0025658	7482	8441	37058	37611	3.54714e-07	3.4635e-07	2.99418e-07	2.99227e-07	0	0	0	0	2.47776e-39	2.36819e-43	7957.34	37334	0.0765173	0.0726997	1.85839	1.13876e-19	tissue factor pathway inhibitor 2	NM_001271004.1,NM_006528.3,NM_001271003.1
BCL11B	PH_hs_0003725	60	99	475	490	0.00221652	0.000452246	4.32224e-06	0.00851376	-50	0	0	0	1.40229e-06	8.56467e-16	78.7246	482.479	0.213464	0.12562	1.85794	7.10532e-06	B-cell CLL/lymphoma 11B (zinc finger protein)	NM_138576.2,NM_022898.1
ADAMTS6	PH_hs_0047795	290	381	1737	1842	1.4604e-05	4.46799e-05	6.89345e-07	0.33603	0	0	0	0	1.42559e-14	0.0535705	334.063	1789.33	0.131494	0.620664	1.84046	2.41526e-14	ADAM metallopeptidase with thrombospondin type 1 motif, 6	NM_197941.2
ASB1	PH_hs_0026771	147	327	1090	1452	0.000118858	1.05749e-05	1.09052e-06	8.02069e-07	0	0	0	0	5.57134e-05	2.00618e-12	233.099	1270.35	0.258782	0.14416	1.83226	0.00026159	ankyrin repeat and SOCS box containing 1	NM_001040445.1
ABL2	PH_hs_0027902	237	256	1295	1317	2.6791e-05	2.08057e-05	8.9891e-07	8.83348e-07	0	0	0	0	1.60993e-27	1.88504e-39	246.638	1305.98	0.0925401	0.0763958	1.80946	1.58496e-15	v-abl Abelson murine leukemia viral oncogene homolog 2	NM_001168239.1,NM_001168238.1,NM_001168237.1,NM_001168236.1,NM_001136000.2,NM_005158.4,NM_007314.3
DDX21	PH_hs_0010109	172	257	1147	1093	7.10298e-05	2.05684e-05	1.02698e-06	1.0869e-06	0	0	0	0	6.12883e-10	6.25007e-30	212.912	1120.11	0.164559	0.0884622	1.80183	3.13469e-08	DEAD (Asp-Glu-Ala-Asp) box helicase 21	NM_001256910.1,NM_004728.3
PMAIP1	PH_hs_0061438	892	817	4177	4696	1.41578e-06	0.0735048	4.17847e-07	4.01214e-07	0	0	0	0	1.41565e-06	3.44698e-24	858.492	4435.61	0.213552	0.0992235	1.79734	6.35901e-07	phorbol-12-myristate-13-acetate-induced protein 1	NM_021127.2
KLHL24	PH_hs_0060620	135	158	746	768	0.000158024	9.51048e-05	1.85237e-06	1.7687e-06	0	0	0	0	9.19073e-20	1.06868e-34	146.29	756.97	0.110834	0.0817631	1.79572	1.55369e-15	kelch-like 24 (Drosophila)	NM_017644.3
FST	PH_hs_0001026	69	92	402	468	0.00146244	0.000568374	6.29897e-06	4.56274e-06	-50	0	0	0	2.1966e-10	4.74503e-18	80.1261	434.885	0.160272	0.116551	1.79419	1.45077e-12	follistatin	NM_006350.3
C20orf111	PH_hs_0004370	112	216	677	1100	0.000296913	3.78982e-05	2.17513e-06	2.70906e-06	0	0	0	0	8.18519e-06	1.9049e-07	161.813	887.737	0.232051	0.196919	1.79137	0.000532352	chromosome 20 open reading frame 111	NM_016470.7
EREG	PH_hs_0006315	37	95	419	468	0.2222	0.445181	5.88845e-06	4.45863e-06	-50	0	0	0	0.357711	1.95416e-21	64.7172	443.416	2.74285	0.105988	1.78035	0.364054	epiregulin	NM_001432.2
MSC	PH_hs_0003114	343	362	1760	1862	9.33749e-06	0.0055966	6.77862e-07	8.42671e-07	0	0	0	0	5.46708e-16	1.07967e-31	352.901	1810.84	0.124752	0.0857988	1.77988	8.68398e-12	musculin	NM_005098.3
TNFRSF10B	PH_hs_0047893	994	1072	5034	5232	1.22334e-06	0.126852	3.92469e-07	3.87935e-07	0	0	0	0	6.28709e-06	1.10101e-36	1033.62	5132.71	0.22897	0.079386	1.7779	8.27221e-08	tumor necrosis factor receptor superfamily, member 10b	NR_027140.1,NM_147187.2,NM_003842.4
ULBP1	PH_hs_0043125	349	463	1978	2093	8.92118e-06	4.56445e-06	6.19889e-07	5.95565e-07	0	0	0	0	1.54115e-15	3.86876e-32	404.164	2035.32	0.126782	0.0851624	1.77137	3.66439e-13	UL16 binding protein 1	NM_025218.2
ARRDC4	PH_hs_0047787	238	247	1234	1267	2.5791e-05	2.32723e-05	9.46315e-07	9.24268e-07	0	0	0	0	1.09855e-22	4.41351e-37	242.877	1250.46	0.102751	0.0789353	1.76756	2.0656e-13	arrestin domain containing 4	NM_183376.2
PTX3	PH_hs_0000274	2420	3065	12985	12242	5.42121e-07	4.76756e-07	3.24365e-07	3.26783e-07	0	0	0	0	3.23045e-21	1.90173e-30	2733.22	12615	0.106585	0.0876559	1.7561	1.13548e-13	pentraxin 3, long	NM_002852.3
ISG20	PH_hs_0022269	85	92	440	443	0.000737401	0.322101	5.12019e-06	5.03786e-06	0	0	0	0	0.0337022	5.92493e-36	88.5451	441.5	0.546757	0.0802361	1.75004	0.000796722	interferon stimulated exonuclease gene 20kDa	NM_002201.4
IL33	PH_hs_0032760	53	78	337	368	0.0032023	0.00155001	9.77026e-06	7.80704e-06	-50	0	0	0	1.62323e-07	8.74329e-23	65.039	352.448	0.19575	0.102507	1.723	1.11711e-13	interleukin 33	NM_001199641.1,NM_001199640.1,NM_033439.3
C3orf52	PH_hs_0025319	281	426	1616	1825	1.59508e-05	5.50913e-06	7.27881e-07	6.5862e-07	0	0	0	0	2.97826e-10	4.86371e-23	350.761	1720.14	0.16151	0.101887	1.71944	2.13349e-08	chromosome 3 open reading frame 52	NM_024616.2,NM_001171747.1
SCG5	PH_hs_0000307	85	115	379	510	0.000746369	0.368191	7.26069e-06	3.71744e-06	0	0	0	0	0.125508	2.79112e-11	99.5	444.266	0.871168	0.152567	1.71591	0.00474796	secretogranin V (7B2 protein)	NM_001144757.1,NM_003020.3
BEX2|BEX1	PH_hs_0049585	200	283	1141	1233	4.39336e-05	1.56463e-05	1.03325e-06	9.47135e-07	0	0	0	0	1.01097e-11	7.32589e-28	240.029	1186.85	0.149155	0.0919275	1.71496	2.06182e-09	brain expressed X-linked 2|brain expressed, X-linked 1	NM_001168401.1,NM_032621.3,NM_001168400.1,NM_001168399.1|NM_018476.3
HIST1H4H	PH_hs_0042257	162	133	713	748	8.64192e-05	0.000165943	1.99326e-06	1.8437e-06	0	0	0	0	2.20812e-09	4.31354e-31	148.589	730.446	0.170422	0.0866807	1.71224	9.64743e-07	histone cluster 1, H4h	NM_003543.3
LOX	PH_hs_0005671	366	592	2118	2482	7.91361e-06	2.76955e-06	5.9072e-07	1.5475e-06	0	0	0	0	5.21032e-09	3.04333e-19	474.552	2299.36	0.174711	0.11248	1.71197	7.86287e-07	lysyl oxidase	NM_001178102.1,NM_002317.5
RND3	PH_hs_0000694	1728	2426	8900	9688	6.88422e-07	5.41339e-07	3.43034e-07	3.38122e-07	0	0	0	0	2.68493e-14	1.26582e-28	2064.75	9292.68	0.132933	0.0906038	1.70166	1.01884e-10	Rho family GTPase 3	NM_005168.4,NM_001254738.1
FGF2	PH_hs_0048770	152	179	778	816	0.000435226	6.26271e-05	0.100621	1.611e-06	0	0	0	0	1.72983e-18	8.991e-07	165.237	796.941	0.115005	0.20943	1.67997	0.00127719	fibroblast growth factor 2 (basic)	NM_002006.4
GDF15	PH_hs_0035765	1134	1192	5308	5272	1.04067e-06	9.83097e-07	3.86319e-07	1.39134e-06	0	0	0	0	5.78289e-31	7.67457e-39	1164.44	5290.14	0.0868708	0.0770259	1.67557	2.48325e-12	growth differentiation factor 15	NM_004864.2
AKR1C1|LOC101060798	PH_hs_0062199	4137	5077	19254	19712	4.19314e-07	3.91444e-07	3.1165e-07	3.11049e-07	0	0	0	0	9.74979e-25	7.1235e-41	4594.99	19482.4	0.0980237	0.0749837	1.67152	3.4871e-16	aldo-keto reductase family 1, member C1|aldo-keto reductase family 1 member C2-like	NM_001353.5|XM_003960854.1,XM_003960853.1,XM_003960852.1
BMP2	PH_hs_0004220	211	235	1103	1043	3.71535e-05	2.67701e-05	1.07599e-06	1.15086e-06	0	0	0	0	9.68297e-29	1.1935e-28	222.955	1073.12	0.0904067	0.0905604	1.66874	3.6356e-12	bone morphogenetic protein 2	NM_001200.2
TIPARP	PH_hs_0001220	529	696	2858	2814	0.00330014	2.07795e-06	4.93752e-07	4.98554e-07	0	0	0	0	4.04251e-12	5.90963e-38	609.855	2836.12	0.146262	0.0779703	1.66294	4.02338e-10	TCDD-inducible poly(ADP-ribose) polymerase	NM_001184717.1,NM_001184718.1,NM_015508.4
PELI1	PH_hs_0000813	115	145	584	619	0.000273336	0.000125277	2.84038e-06	2.5489e-06	0	0	0	0	2.03533e-14	1.02291e-28	129.574	601.444	0.132298	0.090447	1.65371	8.82606e-11	pellino E3 ubiquitin protein ligase 1	NM_020651.3
FGF2	PH_hs_0028108	534	562	2557	2510	3.63095e-06	3.05901e-06	5.26375e-07	5.30419e-07	0	0	0	0	1.36453e-28	4.22913e-37	548.662	2533.62	0.0906592	0.0789144	1.65033	6.36451e-12	fibroblast growth factor 2 (basic)	NM_002006.4
RHOB	PH_hs_0033148	85	99	404	432	0.000750214	0.000446162	6.75292e-06	5.33306e-06	0	0	0	0	1.26277e-16	7.32567e-26	91.8792	417.954	0.12204	0.0956937	1.64607	3.16268e-13	ras homolog family member B	NM_004040.2
HIST1H3D	PH_hs_0045638	38	87	372	371	0.0516071	0.000684117	7.60746e-06	7.6528e-06	-50	0	0	0	0.000879942	8.60307e-33	61.433	371.507	0.319691	0.084255	1.64366	1.48015e-11	histone cluster 1, H3d	NM_003530.3
ANKRD30BL	PH_hs_0046433	934	1070	4430	4525	1.32866e-06	1.11522e-06	4.11613e-07	4.06219e-07	0	0	0	0	6.55938e-33	1.1151e-40	1001.1	4477.39	0.0840944	0.0751723	1.63947	8.77916e-18	ankyrin repeat domain 30B-like	NR_027020.2
CREBRF	PH_hs_0009902	141	157	717	667	0.000136728	9.5715e-05	1.97552e-06	2.23183e-06	0	0	0	0	8.88014e-25	2.49861e-25	148.971	692.101	0.0979366	0.0967773	1.63422	5.72498e-11	CREB3 regulatory factor	NM_153607.2
PSAT1	PH_hs_0014797	2534	3016	11418	12029	5.27499e-07	2.63791e-06	3.29855e-07	3.39594e-07	0	0	0	0	9.33408e-27	3.13727e-34	2769.87	11722.5	0.0939528	0.0823542	1.63084	4.42768e-17	phosphoserine aminotransferase 1	NM_021154.3,NM_058179.2
CCL5	PH_hs_0034077	148	209	849	804	0.000116739	3.83506e-05	1.5237e-06	1.65018e-06	0	0	0	0	3.91293e-11	3.44182e-28	177.422	826.594	0.153754	0.0913509	1.63069	8.90092e-08	chemokine (C-C motif) ligand 5	NM_002985.2
ADM	PH_hs_0025829	499	625	2491	2578	3.89115e-06	2.50482e-06	5.32803e-07	5.22276e-07	0	0	0	0	3.8108e-20	7.38848e-37	560.252	2534.37	0.109668	0.0791884	1.62599	3.51476e-14	adrenomedullin	NM_001124.1
WTAP	PH_hs_0049671	462	1024	3002	3356	4.58603e-06	0.00148517	4.81432e-07	4.57768e-07	0	0	0	0	0.000233349	1.17217e-24	730.827	3178.39	0.285782	0.098196	1.62256	0.000261837	Wilms tumor 1 associated protein	NM_001270533.1,NM_001270532.1,NM_152858.2,NM_152857.2
TSC22D1	PH_hs_0029106	1965	2278	9040	8934	6.37131e-07	5.63378e-07	3.42096e-07	3.42803e-07	0	0	0	0	2.39445e-32	7.40858e-40	2118.96	8987.32	0.0848696	0.0759852	1.61621	5.2742e-16	TSC22 domain family, member 1	NM_001243798.1,NM_001243797.1,NM_006022.3,NM_183422.3
AFF4	PH_hs_0048468	101	182	545	750	0.000417066	5.92311e-05	3.24822e-06	1.83578e-06	0	0	0	0	2.36781e-06	6.11983e-11	139.831	647.133	0.218523	0.155368	1.60626	0.000288049	AF4/FMR2 family, member 4	NM_014423.3
MMP3	PH_hs_0024245	11687	16628	52490	54660	3.28811e-07	3.19548e-07	2.95617e-07	2.95256e-07	0	0	0	0	5.26323e-14	6.13325e-37	14069.4	53571.7	0.134515	0.0790966	1.6034	7.41412e-10	matrix metallopeptidase 3 (stromelysin 1, progelatinase)	NM_002422.3
ORAOV1	PH_hs_0019274	85	136	427	557	0.000741613	0.000154139	5.61693e-06	3.11732e-06	0	0	0	0	1.61525e-07	1.90215e-12	109.502	491.768	0.195715	0.144004	1.59378	3.81148e-05	oral cancer overexpressed 1	NM_153451.2
EIF2S3	PH_hs_0049286	79	154	451	593	0.000942486	0.000111843	4.83916e-06	2.75981e-06	0	0	0	0	1.86549e-05	3.13209e-12	114.919	521.747	0.24251	0.145486	1.59138	0.000603876	eukaryotic translation initiation factor 2, subunit 3 gamma, 52kDa	NM_001415.3
IGFBP3	PH_hs_0036058	1157	1374	5216	5452	1.01683e-06	8.47026e-07	3.88304e-07	3.83328e-07	0	0	0	0	1.09452e-27	1.67577e-35	1263.23	5333.64	0.0922383	0.0807752	1.57608	4.3338e-17	insulin-like growth factor binding protein 3	NM_000598.4,NM_001013398.1
FBXO30	PH_hs_0040774	95	116	452	450	0.0655119	0.0394462	4.81316e-06	4.86091e-06	0	0	0	0	1.78611e-05	7.6554e-34	105.238	451.01	0.241924	0.0828536	1.5547	4.33449e-07	F-box protein 30	NM_032145.4
ATP5J	PH_hs_0044403	88	134	413	548	0.000660189	0.000162169	6.74777e-06	3.21392e-06	0	0	0	0	2.47392e-08	8.53786e-12	110.128	480.259	0.183379	0.148609	1.55172	2.93031e-05	ATP synthase, H+ transporting, mitochondrial Fo complex, subunit F6	NM_001003701.1,NM_001003703.1,NM_001685.4
FOXC1	PH_hs_0016832	564	845	2973	3001	3.03814e-06	1.54147e-06	4.83787e-07	4.81509e-07	0	0	0	0	3.23744e-11	2.28412e-43	699.24	2986.99	0.153084	0.0726853	1.55097	6.60367e-08	forkhead box C1	NM_001453.2
RBBP6	PH_hs_0044209	30	97	371	401	0.031708	0.00391647	7.6521e-06	6.33814e-06	-50	0	0	0	0.0063609	2.72506e-24	61.9865	385.95	0.401371	0.0989969	1.54374	7.89843e-12	retinoblastoma binding protein 6	NM_032626.5
SAT1	PH_hs_0035404	4781	5302	19602	19328	3.98906e-07	3.86419e-07	3.11196e-07	3.91259e-06	0	0	0	0	1.56945e-43	8.07822e-36	5041.02	19465.8	0.0725413	0.0803957	1.54043	9.54086e-12	spermidine/spermine N1-acetyltransferase 1	NM_002970.2,NR_027783.1
CHST11	PH_hs_0020084	272	403	1584	1342	7.48965e-05	6.26114e-06	7.40688e-07	8.66518e-07	0	0	0	0	1.72232e-10	6.70416e-18	335.07	1463.46	0.159304	0.117094	1.53323	2.82033e-06	carbohydrate (chondroitin 4) sulfotransferase 11	NM_001173982.1,NM_018413.5
HDAC9	PH_hs_0045029	365	444	1654	1807	7.97506e-06	5.17825e-06	7.13512e-07	6.63736e-07	0	0	0	0	9.36345e-22	5.69591e-27	403.534	1730.24	0.105132	0.0935493	1.53072	3.35225e-13	histone deacetylase 9	NM_001204148.1,NM_001204147.1,NM_001204146.1,NM_001204145.1,NM_001204144.1,NM_014707.1
SLC38A1	PH_hs_0022481	224	310	1163	1139	3.09531e-05	1.21896e-05	1.01098e-06	1.40839e-06	0	0	0	0	1.00808e-12	1.61669e-34	265.518	1151.06	0.14218	0.0819888	1.5251	1.83944e-08	solute carrier family 38, member 1	NM_001077484.1,NM_030674.3
NFIL3	PH_hs_0031353	83	117	392	445	0.000805079	0.000269404	6.69708e-06	9.24514e-06	0	0	0	0	1.17504e-09	2.07928e-19	99.4002	418.409	0.167461	0.111949	1.52279	1.2853e-06	nuclear factor, interleukin 3 regulated	NM_005384.2
IGFBP3	PH_hs_0047838	3349	4581	14897	15481	4.57129e-07	4.04519e-07	3.193e-07	3.18015e-07	0	0	0	0	7.7401e-16	3.27207e-37	3944.11	15188.1	0.125422	0.0787894	1.5203	1.9927e-10	insulin-like growth factor binding protein 3	NM_000598.4,NM_001013398.1
JHDM1D	PH_hs_0012489	197	228	913	925	4.60847e-05	2.93483e-05	1.37083e-06	1.34704e-06	0	0	0	0	1.71311e-23	4.6482e-39	212.254	918.99	0.100812	0.0767991	1.51872	3.04298e-13	jumonji C domain containing histone demethylase 1 homolog D (S. cerevisiae)	NM_030647.1
DAP3	PH_hs_0023346	85	135	399	530	0.000739388	0.000157847	6.41363e-06	3.44207e-06	0	0	0	0	1.27216e-07	9.52798e-12	109.026	464.266	0.194009	0.148963	1.51443	8.55109e-05	death associated protein 3	NM_001199851.1,NM_001199850.1,NM_001199849.1,NM_004632.3,NM_033657.2
BEX4	PH_hs_0010877	74	164	452	554	0.00121973	8.31129e-05	4.81588e-06	3.1462e-06	0	0	0	0	0.000115605	3.07923e-15	117.051	502.82	0.271575	0.128194	1.50838	0.0025972	brain expressed, X-linked 4	NM_001127688.2,NM_001080425.3
FST	PH_hs_0044664	622	779	2511	3313	2.52762e-06	1.72978e-06	5.34316e-07	4.59369e-07	0	0	0	0	1.23588e-20	4.39433e-13	698.323	2910.57	0.108229	0.139894	1.492	1.41942e-07	follistatin	NM_013409.2,NM_006350.3
XPO7	PH_hs_0049306	230	447	1280	1541	2.85772e-05	4.93426e-06	9.09972e-07	7.59116e-07	0	0	0	0	3.52388e-06	1.58949e-17	333.928	1410.04	0.222606	0.118486	1.48873	0.00025508	exportin 7	NM_015024.4
SERPINE1	PH_hs_0024995	319	452	1334	1946	1.12808e-05	4.81221e-06	8.71857e-07	6.33851e-07	0	0	0	0	1.75488e-12	8.56429e-10	383.14	1638.9	0.143768	0.166032	1.47892	2.41757e-05	serpin peptidase inhibitor, clade E (nexin, plasminogen activator inhibitor type 1), member 1	NM_001165413.2,NM_000602.4
JMY	PH_hs_0047844	86	92	360	358	0.000711331	0.00057345	8.24846e-06	8.36441e-06	0	0	0	0	1.09014e-17	5.09138e-32	89.0713	359.009	0.117872	0.0853313	1.4655	2.68754e-09	junction mediating and regulatory protein, p53 cofactor	NM_152405.4
JARID2	PH_hs_0003026	703	778	3016	2928	2.06258e-06	1.73286e-06	4.80325e-07	4.87528e-07	0	0	0	0	6.06096e-39	5.74859e-35	740.467	2972.2	0.0769189	0.0814285	1.45691	1.60907e-11	jumonji, AT rich interactive domain 2	NM_004973.3,NM_001267040.1
SDCBP	PH_hs_0043772	533	738	2534	2528	3.39588e-06	1.8838e-06	5.27498e-07	5.28205e-07	0	0	0	0	4.222e-14	5.31905e-41	631.964	2531.05	0.133991	0.0748615	1.45179	9.09628e-09	syndecan binding protein (syntenin)	NM_001007070.1,NM_001007069.1,NM_001007068.1,NM_001007067.1,NM_005625.3
F3	PH_hs_0003939	295	317	1193	1299	0.247422	1.14691e-05	9.82207e-07	0.0314769	0	0	0	0	0.00449259	1.31028e-09	306.211	1245.82	0.382758	0.167961	1.44876	1.17653e-05	coagulation factor III (thromboplastin, tissue factor)	NM_001178096.1,NM_001993.4
HIST1H4E	PH_hs_0012922	97	111	404	424	0.000477639	0.000305769	0.227616	5.56212e-06	0	0	0	0	8.05914e-19	0.00178953	103.909	413.969	0.113875	0.343282	1.44792	0.00901929	histone cluster 1, H4e	NM_003545.3
SEC62	PH_hs_0061177	80	131	430	409	0.00089857	0.000174324	5.38506e-06	6.04767e-06	0	0	0	0	4.01846e-07	3.01268e-26	104.49	419.544	0.202656	0.0949312	1.44471	0.000105413	SEC62 homolog (S. cerevisiae)	NM_003262.3
SCRN1	PH_hs_0060564	76	122	325	341	0.00106333	0.286648	1.07328e-05	0.481116	0	0	0	0	0.0540598	0.426509	98.0984	332.975	0.622393	5.39752	1.44227	0.010734	secernin 1	NM_001145513.1,NM_001145515.1,NM_001145514.1,NM_014766.4
SAT1	PH_hs_0002492	1067	1171	4181	4547	1.11928e-06	2.16668e-06	4.17736e-07	4.05543e-07	0	0	0	0	2.12726e-38	1.8983e-28	1119.18	4363.39	0.0774933	0.0909043	1.44125	5.21205e-12	spermidine/spermine N1-acetyltransferase 1	NM_002970.2,NR_027783.1
SLC3A2	PH_hs_0027162	14904	16036	49460	56180	3.19291e-07	3.16882e-07	2.96173e-07	2.95023e-07	0	0	0	0	2.68791e-38	1.87079e-23	15480.2	52808.4	0.0776018	0.100901	1.43999	1.56435e-10	solute carrier family 3 (activators of dibasic and neutral amino acid transport), member 2	NM_001013251.2,NM_001012664.2,NM_002394.5,NM_001012662.2,NR_037193.1
CD274	PH_hs_0060553	119	133	445	566	0.000240744	0.000208668	5.08107e-06	3.01621e-06	0	0	0	0	2.47891e-22	1.73421e-13	125.964	505.285	0.103636	0.13746	1.43105	2.07565e-07	CD274 molecule	NR_052005.1,NM_001267706.1,NM_014143.3
DDX3X	PH_hs_0028290	144	159	568	659	0.000132251	9.181e-05	2.99573e-06	2.27916e-06	0	0	0	0	8.8424e-26	4.39066e-19	151.502	613.341	0.0958576	0.112999	1.43016	1.21509e-09	DEAD (Asp-Glu-Ala-Asp) box polypeptide 3, X-linked	NM_001193417.1,NM_001193416.1,NM_001356.3
GEM	PH_hs_0004561	732	1177	3486	3839	1.90908e-06	9.97325e-07	4.49098e-07	4.31478e-07	0	0	0	0	1.66998e-09	1.32549e-26	945.77	3661.9	0.169092	0.0942425	1.42205	4.95408e-06	GTP binding protein overexpressed in skeletal muscle	NM_181702.2,NM_005261.3
DUSP6	PH_hs_0023584	58	105	382	385	0.00245298	0.000368671	7.31676e-06	6.99365e-06	-50	0	0	0	1.04767e-05	7.9639e-35	80.53	383.5	0.235046	0.0816039	1.41987	5.24947e-10	dual specificity phosphatase 6	NM_022652.2,NM_001946.2
DEDD2	PH_hs_0015226	266	424	1233	1508	1.86303e-05	5.56245e-06	9.47131e-07	7.74923e-07	0	0	0	0	4.7139e-09	1.65834e-16	341.915	1370.01	0.174194	0.122531	1.41209	1.99945e-05	death effector domain containing 2	NM_001270615.1,NM_001270614.1,NM_133328.3,NR_073052.1,NR_073051.1,NR_073050.1,NR_073048.1,NR_073049.1,NR_073046.1,NR_073047.1
USP36	PH_hs_0049324	264	423	1314	1390	1.90593e-05	5.59319e-06	8.8563e-07	8.36633e-07	0	0	0	0	6.0891e-09	1.88001e-31	340.387	1351.88	0.175524	0.0861487	1.40834	6.79114e-06	ubiquitin specific peptidase 36	NM_025090.3
GPR176	PH_hs_0002944	24	111	359	449	0.134603	0.00506459	8.32257e-06	4.88489e-06	-50	0	0	0	0.0199706	6.8729e-14	65.4976	403.841	0.486771	0.135158	1.40278	4.67021e-07	G protein-coupled receptor 176	NM_001271855.1,NM_001271854.1,NM_007223.2
GADD45A	PH_hs_0004630	3334	3545	11773	12829	4.58045e-07	4.45856e-07	3.28475e-07	3.24848e-07	0	0	0	0	7.31773e-35	1.5531e-28	3442.77	12299.2	0.0815582	0.0907551	1.3959	1.5842e-10	growth arrest and DNA-damage-inducible, alpha	NM_001199742.1,NM_001924.3,NM_001199741.1
PIK3CD	PH_hs_0025191	180	237	738	925	6.1358e-05	2.61151e-05	1.88458e-06	1.34605e-06	0	0	0	0	3.36107e-14	9.70261e-15	207.596	831.168	0.133455	0.130642	1.39476	8.40401e-07	phosphatidylinositol-4,5-bisphosphate 3-kinase, catalytic subunit delta	NM_005026.3
ODC1	PH_hs_0025897	8659	13885	34023	42610	3.44729e-07	9.87105e-06	3.0058e-07	2.46257e-06	0	0	0	0	3.51762e-09	5.8505e-15	11169.6	38301.3	0.172709	0.129546	1.39468	5.81744e-05	ornithine decarboxylase 1	NM_002539.1
ITPRIP	PH_hs_0002493	1814	1945	7050	6763	6.61777e-07	7.26765e-07	3.59296e-07	3.62693e-07	0	0	0	0	1.50912e-35	2.76626e-33	1880.9	6907.12	0.0807204	0.083589	1.39344	4.76239e-10	inositol 1,4,5-trisphosphate receptor interacting protein	NM_033397.3,NM_001272013.1,NM_001272012.1
ETS2	PH_hs_0048801	2508	2723	9032	9825	5.30766e-07	5.06537e-07	3.42146e-07	3.37364e-07	0	0	0	0	3.95127e-39	9.94474e-29	2616.63	9427.17	0.0767261	0.0904263	1.38702	4.78279e-11	v-ets erythroblastosis virus E26 oncogene homolog 2 (avian)	NM_001256295.1,NM_005239.5
DUSP16	PH_hs_0001766	197	250	730	1061	4.60571e-05	2.22967e-05	1.9176e-06	1.12679e-06	0	0	0	0	2.24784e-16	1.10964e-09	222.733	894.905	0.123086	0.167199	1.37348	2.66048e-05	dual specificity phosphatase 16	NM_030640.2
SERF2|SERF2-C15ORF63	PH_hs_0035944	1895	2904	7663	9477	6.39875e-07	4.90807e-07	3.52963e-07	3.39352e-07	0	0	0	0	4.86363e-11	1.81446e-16	2380.29	8566.79	0.154533	0.122694	1.37061	9.40795e-06	small EDRK-rich factor 2|SERF2-C15orf63 readthrough	NM_001199876.1,NM_001199878.1,NM_001199877.1,NM_001199875.1,NM_001018108.3,NR_037672.1|NR_037673.1
PSAT1	PH_hs_0060744	2324	2522	8461	8814	5.55824e-07	5.28934e-07	3.46197e-07	3.43648e-07	0	0	0	0	6.9169e-39	1.74238e-36	2424.08	8636.97	0.0769787	0.0796152	1.36735	1.03038e-11	phosphoserine aminotransferase 1	NM_058179.2
IER3	PH_hs_0004390	19510	22377	65507	65506	3.11311e-07	3.08053e-07	2.93816e-07	2.93816e-07	0	0	0	0	6.82049e-36	1.90577e-43	20924	65507.4	0.0803085	0.0726152	1.36733	8.92072e-14	immediate early response 3	NM_003897.3
PCK2	PH_hs_0004373	1121	1374	4603	4516	1.0548e-06	8.48772e-07	4.03873e-07	4.06479e-07	0	0	0	0	9.54319e-24	1.14045e-37	1244.29	4559.72	0.100224	0.078282	1.36314	3.34011e-11	phosphoenolpyruvate carboxykinase 2 (mitochondrial)	NM_004563.2
SKIL	PH_hs_0023358	55	75	277	252	0.00287028	0.00128773	1.66181e-05	2.19462e-05	-50	0	0	0	5.25594e-09	1.35923e-19	64.6625	264.549	0.174756	0.111364	1.36013	1.01499e-06	SKI-like oncogene	NM_001248008.1,NM_001145098.2,NM_001145097.2,NM_005414.4
BMP2	PH_hs_0047831	290	296	1127	1160	1.46103e-05	1.38012e-05	0.0254209	1.54746e-06	0	0	0	0	4.54411e-22	1.40527e-12	293.578	1143.45	0.10431	0.143125	1.35714	0.00199861	bone morphogenetic protein 2	NM_001200.2
RYBP	PH_hs_0000817	41	134	413	554	0.0142294	0.000162693	5.91257e-06	3.14483e-06	-50	0	0	0	0.00316382	1.80383e-11	85.3976	483.248	0.36626	0.151072	1.35637	3.50028e-06	RING1 and YY1 binding protein	NM_012234.5
BAMBI	PH_hs_0023918	313	313	1242	1165	0.000580396	1.18757e-05	9.40348e-07	1.00884e-06	0	0	0	0	2.52799e-16	9.90629e-28	313.777	1203.66	0.123302	0.0921608	1.34995	2.09909e-07	BMP and activin membrane-bound inhibitor homolog (Xenopus laevis)	NM_012342.2
ATP6V1H	PH_hs_0001719	334	594	1565	1910	9.99016e-06	2.77591e-06	7.4867e-07	6.36129e-07	0	0	0	0	2.27503e-07	8.54655e-17	458.667	1736.89	0.198241	0.121346	1.34452	0.000215392	ATPase, H+ transporting, lysosomal 50/57kDa, V1 subunit H	NM_213620.2,NM_213619.2,NM_015941.3
ADAMTS6	PH_hs_0029987	79	83	286	293	0.362095	0.00136612	1.51731e-05	1.42149e-05	0	0	0	0	0.0892742	1.06447e-29	81.1013	289.491	0.743363	0.0888303	1.34187	0.0193502	ADAM metallopeptidase with thrombospondin type 1 motif, 6	NM_197941.2
HIST2H3C|HIST2H3A	PH_hs_0034534	56	88	296	309	0.002737	0.00075237	1.38006e-05	0.23602	-50	0	0	0	5.93153e-07	0.00325693	71.3806	302.48	0.20585	0.367549	1.34091	0.0176194	histone cluster 2, H3c|histone cluster 2, H3a	NM_021059.2|NM_001005464.2
METRNL	PH_hs_0034387	160	229	689	787	8.99252e-05	2.90429e-05	2.11167e-06	1.70604e-06	0	0	0	0	6.38353e-11	1.00496e-20	193.262	737.83	0.155523	0.10797	1.33703	4.21267e-06	meteorin, glial cell differentiation regulator-like	NM_001004431.1
NR1D1	PH_hs_0014232	50	78	260	280	0.00378879	0.000979461	1.989e-05	1.61286e-05	-50	0	0	0	7.41198e-07	6.89066e-23	63.4605	269.967	0.207745	0.102254	1.33556	1.12002e-09	nuclear receptor subfamily 1, group D, member 1	NM_021724.4
RMND5A	PH_hs_0047661	320	370	1281	1324	1.11814e-05	7.70308e-06	9.09209e-07	8.78546e-07	0	0	0	0	9.51832e-27	9.00161e-36	344.609	1302.44	0.0939689	0.0804517	1.33311	3.87686e-13	required for meiotic nuclear division 5 homolog A (S. cerevisiae)	NM_022780.3
UAP1	PH_hs_0001837	516	1039	2438	3280	3.62922e-06	1.15642e-06	5.39701e-07	4.65011e-07	0	0	0	0	4.26938e-06	2.4892e-12	766.385	2857.5	0.224658	0.144798	1.33062	0.00164284	UDP-N-acteylglucosamine pyrophosphorylase 1	NM_003115.4
KCTD12	PH_hs_0006042	80	103	296	370	0.000900034	0.000391838	0.000105703	7.743e-06	0	0	0	0	5.56289e-12	8.41458e-13	91.1535	332.869	0.147251	0.141673	1.32735	3.20615e-05	potassium channel tetramerisation domain containing 12	NM_138444.3
BTG1	PH_hs_0013473	132	204	559	660	0.000173363	0.00945975	3.0899e-06	2.2749e-06	0	0	0	0	2.8385e-06	8.29406e-18	166.621	609.323	0.220358	0.117433	1.32372	0.000169543	B-cell translocation gene 1, anti-proliferative	NM_001731.2
C17orf103	PH_hs_0049351	95	100	344	369	0.000740705	0.000434008	9.25682e-06	7.76174e-06	0	0	0	0	6.86892e-17	8.64179e-25	97.6173	356.459	0.120963	0.0979113	1.32347	2.17372e-08	chromosome 17 open reading frame 103	NM_152914.2
XKRY|XKRY2	PH_hs_0062216	1147	1888	5521	5079	1.0284e-06	6.41676e-07	3.81968e-07	3.91444e-07	0	0	0	0	3.93015e-09	1.40321e-26	1502.78	5300.88	0.173267	0.0942898	1.32328	3.9023e-05	XK, Kell blood group complex subunit-related, Y-linked|XK, Kell blood group complex subunit-related, Y-linked 2	NM_004677.2|NM_001002906.1
STC1	PH_hs_0002254	134	159	540	549	0.000244977	9.21059e-05	3.31003e-06	3.20163e-06	0	0	0	0	2.7583e-18	1.47661e-35	146.24	544.491	0.115712	0.080709	1.31759	2.70478e-09	stanniocalcin 1	NM_003155.2
CITED2	PH_hs_0031364	245	261	921	989	2.37076e-05	1.97021e-05	1.35431e-06	1.23633e-06	0	0	0	0	6.37631e-26	2.84288e-28	253.229	954.888	0.0955734	0.0912067	1.31413	9.01545e-10	Cbp/p300-interacting transactivator, with Glu/Asp-rich carboxy-terminal domain, 2	NM_001168389.2,NM_001168388.2,NM_006079.4
ARRDC3	PH_hs_0002173	690	789	2703	2672	2.10567e-06	1.70567e-06	5.08587e-07	5.11832e-07	0	0	0	0	3.51209e-32	8.18851e-39	738.866	2687.59	0.0851031	0.0770554	1.31306	4.12497e-11	arrestin domain containing 3	NM_020801.2
SQSTM1	PH_hs_0010763	3914	6357	16261	17321	4.28227e-07	3.68079e-07	3.16446e-07	3.14551e-07	0	0	0	0	1.31999e-09	2.74088e-32	5087.31	16789.3	0.167995	0.0849518	1.31267	1.40879e-05	sequestosome 1	NM_001142299.1,NM_001142298.1,NM_003900.4
MMP10	PH_hs_0000305	124	130	466	467	0.000209947	0.000328694	4.50043e-06	4.48075e-06	0	0	0	0	1.78251e-18	2.20827e-35	127.166	466.504	0.11505	0.08092	1.31032	4.09768e-08	matrix metallopeptidase 10 (stromelysin 2)	NM_002425.2
SIRT1	PH_hs_0002658	849	979	3208	3367	0.469283	1.24806e-06	4.66246e-07	0.000910538	0	0	0	0	0.376787	2.16742e-21	913.026	3287.25	3.18542	0.10611	1.31025	3.79687e-06	sirtuin 1	NM_001142498.1,NM_012238.4
LOC100134091|FRG1B|FRG1|LOC100289097|LOC642236	PH_hs_0062458	160	365	853	1297	8.99124e-05	7.96756e-06	1.5092e-06	0.00215532	0	0	0	0	7.21986e-05	1.6805e-06	258.038	1074.2	0.263122	0.215173	1.3056	0.0206037	protein FRG1B-like|FSHD region gene 1 family, member B|FSHD region gene 1|protein FRG1-like|FSHD region gene 1 pseudogene	XM_001721786.2|NR_003579.1|NM_004477.2|XM_003403846.1|NR_033907.1
EPB41L4A-AS1	PH_hs_0001134	393	435	1481	1590	6.64974e-06	5.24574e-06	7.91395e-07	0.0046502	0	0	0	0	3.66822e-35	1.87681e-15	413.98	1535.32	0.0811885	0.12718	1.30559	0.00017348	EPB41L4A antisense RNA 1	NR_015370.2
RGS2	PH_hs_0004554	606	751	2462	2516	0.0700262	1.83931e-06	0.0362497	5.32555e-07	0	0	0	0	2.29361e-07	1.82574e-11	676.568	2488.93	0.198302	0.151113	1.30177	5.18456e-08	regulator of G-protein signaling 2, 24kDa	NM_002923.3
VIMP	PH_hs_0046095	434	612	1799	1974	5.27268e-06	2.60313e-06	6.66106e-07	6.30098e-07	0	0	0	0	4.42545e-13	1.72879e-26	519.859	1886.2	0.139913	0.0944636	1.2985	3.57242e-07	VCP-interacting membrane protein	NM_018445.4,NM_203472.1
PAPPA	PH_hs_0030443	691	817	2475	2955	2.74689e-06	1.60796e-06	5.34855e-07	4.85274e-07	0	0	0	0	7.86001e-27	1.66484e-18	752.729	2714.16	0.0938118	0.114947	1.29564	1.33532e-08	pregnancy-associated plasma protein A, pappalysin 1	NM_002581.3
KIN	PH_hs_0006958	391	576	1550	1963	6.73136e-06	2.99715e-06	7.55135e-07	6.23331e-07	0	0	0	0	2.05048e-11	9.51153e-15	480.086	1755.77	0.151506	0.130598	1.29116	2.10179e-05	KIN, antigenic determinant of recA protein homolog (mouse)	NM_012311.3
HOXA11	PH_hs_0013211	96	142	378	481	0.00049457	0.00013349	7.36059e-06	4.20272e-06	0	0	0	0	4.83601e-09	3.04873e-13	118.148	429.317	0.174326	0.138922	1.28693	0.000175905	homeobox A11	NM_005523.5
TAGLN3	PH_hs_0043795	339	504	1514	1520	9.61289e-06	3.86297e-06	7.71578e-07	7.68622e-07	0	0	0	0	5.4529e-11	1.78441e-41	418.431	1517.01	0.154947	0.0744099	1.28689	3.92319e-06	transgelin 3	NM_001008273.1,NM_013259.2,NM_001008272.1
ARC	PH_hs_0003058	189	302	864	924	5.24951e-05	1.30782e-05	1.6013e-05	1.3742e-06	0	0	0	0	1.17835e-08	3.47019e-26	243.291	893.902	0.179098	0.0950513	1.28645	0.000202695	activity-regulated cytoskeleton-associated protein	NM_015193.4
MAFF	PH_hs_0026407	77	87	297	293	0.274904	0.000684357	0.0105234	1.41912e-05	0	0	0	0	0.00951163	6.12557e-15	81.9541	295.011	0.426426	0.129645	1.28267	5.00698e-05	v-maf musculoaponeurotic fibrosarcoma oncogene homolog F (avian)	NM_001161574.1,NM_001161573.1,NM_001161572.1,NM_012323.3
NACA|NACAP1|NACA2	PH_hs_0037263	111	166	389	467	0.000370162	0.387217	6.81343e-06	4.48127e-06	0	0	0	0	0.177368	4.44113e-16	137.472	427.863	1.08056	0.124357	1.28221	0.022792	nascent polypeptide-associated complex alpha subunit|nascent-polypeptide-associated complex alpha polypeptide pseudogene 1|nascent polypeptide-associated complex alpha subunit 2	NM_001113203.2,NM_001113202.1,NR_045277.1|NR_002182.1|NM_199290.3
RAI14	PH_hs_0024075	53	85	248	323	0.00320002	0.000741281	2.28193e-05	1.09131e-05	-50	0	0	0	1.14472e-06	1.00756e-11	68.3731	285.366	0.211594	0.149144	1.2785	6.81927e-06	retinoic acid induced 14	NM_001145525.1,NM_001145523.1,NM_001145522.1,NM_001145521.1,NM_001145520.1,NM_015577.2
TRIM13	PH_hs_0025546	114	169	505	539	0.0393638	7.5211e-05	3.7922e-06	3.91479e-06	0	0	0	0	1.83877e-06	5.54366e-27	140.479	521.945	0.216038	0.0935273	1.27677	0.000525623	tripartite motif containing 13	NM_001007278.1,NM_213590.1,NM_052811.2,NM_005798.3
PPAP2B	PH_hs_0030166	292	406	1135	1397	1.43271e-05	8.30193e-06	1.03959e-06	8.32766e-07	0	0	0	0	6.20033e-13	4.49268e-16	347.023	1265.54	0.140829	0.124378	1.27489	5.54524e-06	phosphatidic acid phosphatase type 2B	NM_003713.4
TM4SF19|TM4SF19-TCTEX1D2	PH_hs_0033215	419	654	1864	1923	5.71756e-06	2.3097e-06	6.47987e-07	6.32878e-07	0	0	0	0	6.81005e-10	4.72851e-37	531.97	1893.42	0.165019	0.078969	1.27411	1.33093e-05	transmembrane 4 L six family member 19|TM4SF19-TCTEX1D2 readthrough	NM_138461.3,NM_001204898.1,NM_001204897.1|NR_037950.1
UBE2E1	PH_hs_0009892	1130	2580	6241	6059	1.04498e-06	5.22047e-07	3.69763e-07	4.35589e-06	0	0	0	0	3.389e-05	1.70124e-32	1823.44	6150.42	0.251007	0.0846629	1.27045	0.00510599	ubiquitin-conjugating enzyme E2E 1	NM_001202476.1,NM_182666.2,NM_003341.4
PPP1R15B	PH_hs_0023971	118	137	429	479	0.000249222	0.000150773	5.7188e-06	4.24318e-06	0	0	0	0	2.2619e-19	1.58451e-21	127.343	453.914	0.112065	0.105742	1.26702	1.36248e-08	protein phosphatase 1, regulatory subunit 15B	NM_032833.3
ZC3H12C	PH_hs_0024262	107	126	397	423	0.000344548	0.000199026	7.99143e-06	5.59434e-06	0	0	0	0	1.10737e-17	4.27765e-26	116.315	409.958	0.117898	0.0952299	1.26118	1.13495e-08	zinc finger CCCH-type containing 12C	NM_033390.1
EIF4E	PH_hs_0031352	71	85	271	280	0.00131457	0.00078737	1.76851e-05	0.0393657	-50	0	0	0	5.63976e-14	3.53034e-10	77.8444	275.487	0.13468	0.162213	1.2558	0.00479534	eukaryotic translation initiation factor 4E	NM_001130679.1,NM_001968.3
CDC42EP2	PH_hs_0001158	105	95	340	362	0.00036658	0.000511882	9.54692e-06	8.13633e-06	0	0	0	0	7.62077e-11	1.32027e-25	100.498	350.964	0.156178	0.0962094	1.25547	2.54004e-05	CDC42 effector protein (Rho GTPase binding) 2	NM_006779.3
RYBP	PH_hs_0049171	341	492	1524	1418	9.4661e-06	4.00511e-06	7.66789e-07	8.20514e-07	0	0	0	0	6.11366e-12	5.71233e-27	413.768	1471.21	0.147547	0.0935516	1.25435	6.73466e-06	RING1 and YY1 binding protein	NM_012234.5
RGMB	PH_hs_0060795	425	502	1608	1657	5.53263e-06	3.84184e-06	7.31025e-07	7.12426e-07	0	0	0	0	1.74095e-25	5.49752e-37	462.73	1632.43	0.0964544	0.0790429	1.25057	8.95878e-12	RGM domain family, member B	NM_001012761.2
AMPD2	PH_hs_0044207	1182	2151	4501	6986	9.92459e-07	5.84546e-07	4.06956e-07	3.62907e-07	0	0	0	0	2.08355e-07	1.26085e-08	1646.47	5739.02	0.197583	0.179476	1.25051	0.00266674	adenosine monophosphate deaminase 2	NM_001257361.1,NM_001257360.1,NM_004037.7,NM_139156.3,NM_203404.1
ABL2	PH_hs_0045672	4232	4474	14255	13600	4.15853e-07	4.07776e-07	3.20843e-07	3.22589e-07	0	0	0	0	6.20442e-34	1.64358e-32	4357.77	13928.9	0.0827352	0.0846422	1.24964	1.30201e-08	v-abl Abelson murine leukemia viral oncogene homolog 2	NM_001168239.1,NM_001168238.1,NM_001168237.1,NM_001168236.1,NM_001136000.2,NM_005158.4,NM_007314.3
ISG15	PH_hs_0028539	203	252	804	840	0.0420746	2.18242e-05	1.78737e-06	1.55843e-06	0	0	0	0	1.39066e-08	3.94452e-32	226.843	821.945	0.180029	0.0851743	1.24491	2.65331e-05	ISG15 ubiquitin-like modifier	NM_005101.3
EGR2	PH_hs_0000185	171	215	666	711	7.24773e-05	3.51042e-05	2.2375e-06	2.00322e-06	0	0	0	0	2.43829e-16	3.66313e-28	192.382	688.427	0.123236	0.091398	1.24474	4.26309e-08	early growth response 2	NM_001136179.1,NM_001136178.1,NM_001136177.1,NM_000399.3
ABCC9	PH_hs_0045036	163	204	608	701	8.46831e-05	4.29973e-05	2.63526e-06	2.05146e-06	0	0	0	0	2.29378e-16	1.05152e-19	182.933	654.338	0.123123	0.111015	1.24082	3.14461e-07	ATP-binding cassette, sub-family C (CFTR/MRP), member 9	NM_020297.2
HIVEP1	PH_hs_0024655	62	78	253	252	0.0020042	0.00147905	2.1659e-05	2.18825e-05	-50	0	0	0	3.51828e-11	2.1191e-29	69.7747	252.505	0.153377	0.0893131	1.23958	2.99454e-07	human immunodeficiency virus type I enhancer binding protein 1	NM_002114.2
C11orf95	PH_hs_0043423	106	174	457	521	0.000563351	6.86299e-05	1.57347e-05	3.59646e-06	0	0	0	0	2.06476e-07	3.28068e-19	138.651	488.889	0.197516	0.112586	1.23947	0.00104329	chromosome 11 open reading frame 95	NM_001144936.1
PTHLH	PH_hs_0031398	80	92	300	291	0.00129121	0.000569939	1.33044e-05	1.44672e-05	0	0	0	0	2.10472e-16	7.85369e-27	85.9142	295.521	0.122965	0.0938111	1.23915	5.75671e-07	parathyroid hormone-like hormone	NM_198966.1,NM_198965.1,NM_198964.1,NM_002820.2
FDCSP	PH_hs_0032648	104	107	354	362	0.00038067	0.00034424	8.60501e-06	0.4285	0	0	0	0	1.60867e-16	0.237959	105.687	357.99	0.122476	1.40276	1.23702	4.71298e-07	follicular dendritic cell secreted protein	NM_152997.3
HIST1H1E	PH_hs_0013158	70	83	267	268	0.00144961	0.00246605	1.84536e-05	1.82334e-05	-50	0	0	0	5.0837e-13	3.56802e-31	76.3656	267.502	0.140287	0.0865583	1.23329	2.91861e-07	histone cluster 1, H1e	NM_005321.2
ETS1	PH_hs_0001623	252	288	973	943	2.17846e-05	1.48917e-05	1.25782e-06	1.31133e-06	0	0	0	0	1.05527e-26	2.33735e-32	269.772	958.068	0.0940538	0.084855	1.22831	8.16678e-09	v-ets erythroblastosis virus E26 oncogene homolog 1 (avian)	NM_001143820.1,NM_005238.3,NM_001162422.1
NRG1	PH_hs_0045743	119	142	432	481	0.0546657	0.000240513	5.32815e-06	4.20432e-06	0	0	0	0	4.31347e-08	7.59596e-22	130.25	456.416	0.186794	0.104892	1.22802	9.84142e-05	neuregulin 1	NM_013958.3,NM_001160007.1,NM_001160005.1,NM_001160002.1,NM_013962.2,NM_004495.3
FAM60A	PH_hs_0049565	543	601	1909	2042	3.27194e-06	2.70122e-06	6.36377e-07	9.77058e-07	0	0	0	0	1.99035e-37	9.11695e-30	571.973	1975.28	0.0785489	0.0887227	1.2266	9.15532e-10	family with sequence similarity 60, member A	NM_001135812.1,NM_001135811.1,NM_021238.2
GRB14	PH_hs_0019549	1010	1350	3799	4076	1.19851e-06	8.61425e-07	4.33284e-07	4.21633e-07	0	0	0	0	1.35503e-16	1.78869e-30	1174.45	3937.05	0.122166	0.087615	1.22602	5.4724e-08	growth factor receptor-bound protein 14	NM_004490.2
PDE4DIP|LOC101060291	PH_hs_0048564	59	80	248	335	0.0055711	0.0343372	2.2846e-05	0.435292	-50	0	0	0	4.9727e-06	0.292546	69.1487	291.344	0.226328	1.83163	1.22397	0.0915409	phosphodiesterase 4D interacting protein|myomegalin-like	NM_001002812.1,NM_001002811.1|XM_003960251.1,XM_003960248.1,XM_003960244.1
RAC1	PH_hs_0033233	176	284	595	1145	6.59348e-05	1.5724e-05	2.86828e-06	1.0291e-06	0	0	0	0	2.14628e-08	1.06244e-05	227.877	869.004	0.182536	0.23522	1.22127	0.00883683	ras-related C3 botulinum toxin substrate 1 (rho family, small GTP binding protein Rac1)	NM_018890.3,NM_006908.4
TDG|LOC732360	PH_hs_0030709	1981	2162	6668	6772	6.19238e-07	5.82547e-07	3.63971e-07	3.62588e-07	0	0	0	0	5.5814e-40	1.45034e-42	2072.13	6719.9	0.0758619	0.0734023	1.21875	4.71178e-10	thymine-DNA glycosylase|G/T mismatch-specific thymine DNA glycosylase-like	NM_003211.4|XR_133016.3
PLK2	PH_hs_0024593	1122	1127	3758	2980	1.06411e-06	2.62463e-05	4.35178e-07	0.252207	0	0	0	0	5.40624e-22	0.00560506	1127.17	3370.47	0.104506	0.394309	1.21865	2.52265e-07	polo-like kinase 2	NM_001252226.1,NM_006622.3
TBX3	PH_hs_0024082	117	135	425	440	0.000254777	0.000158338	8.11395e-06	5.12012e-06	0	0	0	0	8.84935e-20	2.71676e-30	125.864	432.478	0.110783	0.0878953	1.21532	1.05346e-08	T-box 3	NM_016569.3,NM_005996.3
PPIF	PH_hs_0018569	9604	11920	31723	32771	3.38604e-07	3.36526e-07	3.01611e-07	3.01124e-07	0	0	0	0	1.08873e-23	9.9787e-39	10730.9	32245.5	0.100355	0.0771455	1.21485	1.30074e-10	peptidylprolyl isomerase F	NM_005729.3
ZFP36	PH_hs_0016638	218	254	809	843	4.83068e-05	2.12881e-05	1.63202e-06	1.53503e-06	0	0	0	0	4.3791e-23	9.91655e-33	235.688	825.949	0.101778	0.0843395	1.21079	2.46077e-10	ZFP36 ring finger protein	NM_003407.3
PNO1	PH_hs_0023309	341	699	1735	1764	9.48337e-06	2.06011e-06	6.85742e-07	6.76607e-07	0	0	0	0	7.72858e-06	2.43705e-40	512.361	1749.47	0.231371	0.0755047	1.2102	0.00241209	partner of NOB1 homolog (S. cerevisiae)	NM_020143.2
OPTN	PH_hs_0049288	49	106	321	351	0.00400935	0.000354791	1.10882e-05	8.79275e-06	-50	0	0	0	0.000166213	1.94452e-22	76.2707	335.95	0.278658	0.10337	1.20935	9.94187e-09	optineurin	NM_001008213.1,NM_001008212.1,NM_021980.4,NM_001008211.1
KCNG1	PH_hs_0031572	224	304	922	909	3.09503e-05	1.28437e-05	1.36515e-06	1.37897e-06	0	0	0	0	1.72246e-13	1.70967e-35	262.66	915.536	0.137443	0.0807856	1.2071	1.96886e-06	potassium voltage-gated channel, subfamily G, member 1	NM_002237.3
CNBP	PH_hs_0000280	354	620	1606	1679	8.60572e-06	2.54187e-06	7.31826e-07	7.16539e-07	0	0	0	0	1.28789e-07	5.51142e-34	481.574	1642.39	0.194095	0.0826686	1.20511	0.000350349	CCHC-type zinc finger, nucleic acid binding protein	NM_001127196.1,NM_001127195.1,NM_001127194.1,NM_001127193.1,NM_001127192.1,NM_003418.4
NKX3-1	PH_hs_0003656	587	741	2292	2183	2.81418e-06	1.87158e-06	8.7206e-07	5.78824e-07	0	0	0	0	7.33352e-20	1.30339e-30	661.807	2237.73	0.110531	0.0874045	1.20071	1.2241e-07	NK3 homeobox 1	NR_046072.1,NM_001256339.1,NM_006167.3
GFM1	PH_hs_0014174	116	187	384	716	0.000262299	5.42834e-05	8.13735e-06	2.00816e-06	0	0	0	0	6.94426e-08	7.21288e-06	150.105	549.399	0.189872	0.230559	1.19381	0.0113014	G elongation factor, mitochondrial 1	NM_024996.5
FBXO30	PH_hs_0025130	141	227	577	689	0.00125104	2.97725e-05	2.9064e-06	2.11084e-06	0	0	0	0	1.09795e-07	3.98588e-17	182.312	632.803	0.192978	0.120024	1.19328	0.000733977	F-box protein 30	NM_032145.4
SPRY2	PH_hs_0001652	496	668	1891	2004	3.9374e-06	2.22663e-06	6.40892e-07	6.14069e-07	0	0	0	0	2.34084e-15	8.37985e-32	579.155	1947.32	0.127629	0.0856403	1.19181	1.71706e-07	sprouty homolog 2 (Drosophila)	NM_005842.2
CTCF	PH_hs_0024876	49	96	271	313	0.00400945	0.000494253	0.113868	1.21302e-05	-50	0	0	0	5.29447e-05	1.25836e-05	71.5077	291.927	0.257952	0.237344	1.19173	0.0177222	CCCTC-binding factor (zinc finger protein)	NM_001191022.1,NM_006565.3
ISM1	PH_hs_0048740	202	242	770	761	4.26013e-05	2.45408e-05	1.7609e-06	1.79376e-06	0	0	0	0	1.87312e-20	2.77044e-35	221.553	765.527	0.108753	0.0810397	1.1916	3.00771e-08	isthmin 1 homolog (zebrafish)	NM_080826.1
XPOT	PH_hs_0049640	131	239	580	674	0.000174674	2.54629e-05	2.87782e-06	2.19244e-06	0	0	0	0	1.84518e-06	5.2693e-19	182.765	626.836	0.216071	0.11326	1.19	0.00236103	exportin, tRNA	NM_007235.4
NFKB1	PH_hs_0022751	325	457	1300	1353	7.75485e-05	4.69691e-06	8.95261e-07	8.59489e-07	0	0	0	0	3.59828e-12	2.09861e-34	388.678	1326.42	0.145907	0.082132	1.18956	4.01786e-06	nuclear factor of kappa light polypeptide gene enhancer in B-cells 1	NM_001165412.1,NM_003998.3
ACVR1	PH_hs_0009056	89	125	352	362	0.000635469	0.000204881	8.73033e-06	8.1373e-06	0	0	0	0	5.80134e-10	1.17934e-30	106.368	356.987	0.164321	0.0873383	1.18947	5.79542e-05	activin A receptor, type I	NM_001111067.2,NM_001105.4
IQCG	PH_hs_0026865	6243	7201	20189	20203	3.69732e-07	3.57646e-07	3.10452e-07	3.10463e-07	0	0	0	0	2.24711e-34	1.76564e-43	6714.79	20196.2	0.0821697	0.0725891	1.18799	1.67345e-11	IQ motif containing G	NM_001134435.2,NM_032263.3
ZFAND5	PH_hs_0060966	296	432	1007	1543	2.47736e-05	5.32935e-06	1.20307e-06	7.58293e-07	0	0	0	0	2.98985e-11	1.13063e-08	361.511	1274.03	0.152806	0.178868	1.18682	0.00103815	zinc finger, AN1-type domain 5	NM_001102421.1,NM_001102420.1,NM_006007.2
ATF4	PH_hs_0049589	17729	20673	52889	55514	3.13883e-07	3.09877e-07	2.95547e-07	2.95122e-07	0	0	0	0	1.23131e-32	3.00529e-35	19175.2	54197.4	0.0844688	0.0810828	1.1842	2.15812e-12	activating transcription factor 4 (tax-responsive enhancer element B67)	NM_182810.1,NM_001675.2
IRG1	PH_hs_0031930	80	81	270	263	0.00139007	0.00086594	1.78546e-05	1.92555e-05	0	0	0	0	1.89393e-13	1.13917e-26	80.6749	266.516	0.137685	0.094117	1.18407	6.57093e-06	immunoresponsive 1 homolog (mouse)	NM_001258406.1
ZFAND6|ATP8B5P	PH_hs_0062191	376	491	1187	1851	0.00285193	4.02116e-06	9.87696e-07	6.51414e-07	0	0	0	0	2.20732e-12	2.18927e-08	431.708	1517.8	0.144441	0.182653	1.18117	0.00178339	zinc finger, AN1-type domain 6|ATPase, class I, type 8B, member 5, pseudogene	NM_001242917.1,NM_001242915.1,NM_019006.3,NM_001242916.1,NM_001242914.1,NM_001242913.1,NM_001242912.1,NM_001242911.1,NM_001242919.1|NR_003582.1
RSL1D1	PH_hs_0048671	612	765	2266	2298	2.60266e-06	1.77952e-06	5.64839e-07	5.59797e-07	0	0	0	0	9.08882e-21	1.34469e-41	686.393	2281.97	0.107845	0.0742942	1.18006	3.98414e-09	ribosomal L1 domain containing 1	NM_015659.2
PAPD4	PH_hs_0012404	125	142	424	475	0.000204891	0.000133369	5.5783e-06	1.73169e-05	0	0	0	0	1.25622e-21	4.48227e-20	133.407	449.413	0.105471	0.10988	1.17559	5.85206e-07	PAP associated domain containing 4	NM_001114394.1,NM_001114393.1,NM_173797.3
EAF1	PH_hs_0048278	140	141	423	531	0.000252214	0.00013651	5.59643e-06	3.4233e-06	0	0	0	0	1.96098e-16	5.47631e-14	140.824	476.809	0.122836	0.13461	1.17246	2.47814e-05	ELL associated factor 1	NM_033083.6
CEBPD	PH_hs_0029969	520	563	1829	1826	3.57089e-06	3.04787e-06	0.00408303	6.58373e-07	0	0	0	0	2.40809e-33	5.82877e-20	541.772	1827.53	0.0835087	0.110226	1.17185	0.000674293	CCAAT/enhancer binding protein (C/EBP), delta	NM_005195.3
MAFK	PH_hs_0001106	438	498	1467	1668	5.17067e-06	3.90416e-06	7.94381e-07	7.08442e-07	0	0	0	0	5.3343e-31	2.95742e-22	467.665	1567.15	0.0868183	0.103831	1.16982	1.90266e-08	v-maf musculoaponeurotic fibrosarcoma oncogene homolog K (avian)	NM_002360.3
MEX3C	PH_hs_0001223	108	198	443	585	0.000334268	4.53787e-05	5.03509e-06	3.4825e-06	0	0	0	0	3.01723e-06	5.40531e-12	151.135	513.747	0.220986	0.147161	1.16912	0.0057657	mex-3 homolog C (C. elegans)	NM_016626.4
CREB3L2	PH_hs_0048108	361	531	1319	1672	8.19457e-06	3.42218e-06	8.81942e-07	7.07106e-07	0	0	0	0	2.19888e-11	1.27861e-14	442.867	1494.87	0.151745	0.131251	1.16842	0.000104578	cAMP responsive element binding protein 3-like 2	NM_194071.3
ATP6AP2	PH_hs_0010821	84	202	472	472	0.000767852	4.2561e-05	4.37681e-06	5.43061e-06	0	0	0	0	0.000231058	1.09534e-34	140.412	472.006	0.285567	0.0817765	1.16488	0.0222611	ATPase, H+ transporting, lysosomal accessory protein 2	NM_005765.2
DYNC1LI2	PH_hs_0048474	691	1039	2525	3115	2.10041e-06	1.15664e-06	5.28617e-07	4.72799e-07	0	0	0	0	3.06257e-11	2.26991e-16	858.467	2818.96	0.15289	0.123104	1.1634	8.0313e-05	dynein, cytoplasmic 1, light intermediate chain 2	NM_006141.2
VPS26A	PH_hs_0022309	253	423	947	1090	2.15293e-05	0.0702436	1.30388e-06	1.09091e-06	0	0	0	0	0.000677489	1.35926e-20	334.599	1018.25	0.312103	0.108348	1.16198	0.00658908	vacuolar protein sorting 26 homolog A (S. pombe)	NM_001035260.1,NM_004896.3
YOD1	PH_hs_0048190	123	142	413	469	0.00022401	0.000133337	5.92348e-06	4.43796e-06	0	0	0	0	4.27821e-20	5.47276e-20	132.355	440.903	0.109819	0.110143	1.16191	2.71998e-07	YOD1 OTU deubiquinating enzyme 1 homolog (S. cerevisiae)	NM_018566.3
MAP2K3	PH_hs_0010680	1041	1123	3468	3536	1.21036e-06	1.05845e-06	4.50102e-07	4.46359e-07	0	0	0	0	1.53879e-35	7.13177e-41	1082.64	3501.92	0.0807305	0.0749841	1.16017	4.06279e-09	mitogen-activated protein kinase kinase 3	NM_002756.4,NM_145109.2
LARP1B	PH_hs_0045086	117	151	449	429	0.000287019	0.0104199	4.88443e-06	5.41378e-06	0	0	0	0	3.90907e-09	4.68073e-27	133.485	439.043	0.17324	0.0933903	1.16009	9.74082e-05	La ribonucleoprotein domain family, member 1B	NM_032239.2
CCNDBP1	PH_hs_0044254	104	143	382	431	0.000378691	0.000130711	7.15874e-06	5.36175e-06	0	0	0	0	5.84539e-11	2.8128e-20	122.834	406.416	0.1552	0.109274	1.15896	5.8326e-05	cyclin D-type binding-protein 1	NM_012142.4,NR_045999.1,NR_045998.1,NR_027513.2,NR_027514.2
KYNU	PH_hs_0044702	10323	12213	31997	32883	3.34745e-07	3.27873e-07	3.01579e-07	3.01074e-07	0	0	0	0	4.73411e-30	5.38185e-40	11248.8	32438.8	0.088272	0.0758461	1.15548	5.75853e-12	kynureninase	NM_001199241.1,NM_001032998.1,NM_003937.2
CCL5	PH_hs_0026492	355	390	1245	1232	0.00296239	6.77908e-06	9.3737e-07	9.48108e-07	0	0	0	0	2.29886e-20	2.46641e-37	372.552	1238.54	0.109015	0.0786524	1.15367	9.9746e-07	chemokine (C-C motif) ligand 5	NM_002985.2
GDNF	PH_hs_0013989	90	100	300	316	0.000614037	0.000509884	1.33023e-05	1.15744e-05	0	0	0	0	4.6984e-20	3.32605e-26	94.9864	307.975	0.109942	0.0950152	1.15349	6.03568e-08	glial cell derived neurotrophic factor	NM_001190469.1,NM_001190468.1,NM_000514.3,NM_199231.2
ZCCHC17	PH_hs_0003608	167	259	595	854	7.81354e-05	2.01074e-05	2.76173e-06	1.50843e-06	0	0	0	0	4.45993e-09	7.05058e-10	211.234	724.035	0.17391	0.165171	1.15062	0.00149441	zinc finger, CCHC domain containing 17	NM_016505.2
FASTKD5	PH_hs_0044811	35	79	239	241	0.00976303	0.00100283	2.9817e-05	2.49218e-05	-50	0	0	0	0.000443689	2.61131e-30	56.044	240	0.300843	0.0878687	1.14779	1.16377e-06	FAST kinase domains 5	NM_021826.4
DCDC2C	PH_hs_0032586	67	82	249	256	0.00158362	0.00085552	0.13128	2.08399e-05	-50	0	0	0	8.48332e-13	9.94301e-06	74.3108	252.491	0.141696	0.234402	1.1466	0.0276103	doublecortin domain containing 2C	XM_003960283.1,XM_001127882.4,XM_003403748.2
VIMP	PH_hs_0031143	102	121	352	365	0.000404081	0.000227716	8.72793e-06	0.447661	0	0	0	0	6.68614e-17	0.30271	111.303	358.481	0.120916	1.93565	1.14559	1.44669e-07	VCP-interacting membrane protein	NM_203472.1
KRT75	PH_hs_0008685	816	876	2692	2787	1.61098e-06	1.45218e-06	0.000424453	4.37373e-05	0	0	0	0	8.8453e-34	8.32736e-22	846.603	2739.36	0.0829354	0.104997	1.14559	5.06982e-05	keratin 75	NM_004693.2
KRTAP22-1	PH_hs_0030513	52	88	268	264	0.475938	0.4201	1.82345e-05	1.90456e-05	-50	0	0	0	0.39361	3.35112e-28	69.2758	266.011	3.70477	0.0913307	1.1437	0.518067	keratin associated protein 22-1	NM_181620.1
SLC2A3	PH_hs_0041090	574	768	2023	2318	2.9598e-06	1.76865e-06	6.0994e-07	5.56755e-07	0	0	0	0	6.48833e-16	8.44495e-22	667.827	2169.99	0.125081	0.105013	1.14339	1.03342e-06	solute carrier family 2 (facilitated glucose transporter), member 3	NM_006931.2
XBP1	PH_hs_0028446	1710	2084	5510	6213	6.93949e-07	5.97333e-07	3.82183e-07	3.70177e-07	0	0	0	0	6.29834e-25	5.7859e-24	1892.38	5860.29	0.0976185	0.0997284	1.14291	1.64248e-08	X-box binding protein 1	NM_005080.3,NM_001079539.1
QTRTD1	PH_hs_0049130	126	165	458	500	0.000198828	8.13134e-05	4.68696e-06	3.87395e-06	0	0	0	0	3.24445e-13	4.82406e-24	144.888	478.93	0.139086	0.0995503	1.14189	1.03651e-05	queuine tRNA-ribosyltransferase domain containing 1	NM_001256835.1,NM_001256837.1,NM_001256836.1,NM_024638.3
ETS1	PH_hs_0049118	796	1042	2923	3043	0.02386	1.15228e-06	4.87954e-07	4.78223e-07	0	0	0	0	2.68435e-09	8.31621e-36	915.145	2982.82	0.17137	0.0804107	1.1417	5.30254e-05	v-ets erythroblastosis virus E26 oncogene homolog 1 (avian)	NM_001143820.1,NM_005238.3,NM_001162422.1
LARP6	PH_hs_0030119	350	467	1332	1421	0.0801802	4.47878e-06	8.73289e-07	8.18799e-07	0	0	0	0	2.67081e-06	4.33423e-30	406.596	1376.36	0.219737	0.0882118	1.14127	0.000762211	La ribonucleoprotein domain family, member 6	NM_018357.2
VEGFA	PH_hs_0004213	753	903	2549	2778	1.82698e-06	1.39169e-06	5.25713e-07	5.01502e-07	0	0	0	0	1.69694e-25	8.80766e-28	826.314	2663.12	0.0964317	0.0920697	1.1409	1.39207e-09	vascular endothelial growth factor A	NM_001171629.1,NM_001171626.1,NM_001171625.1,NM_001171624.1,NM_001171623.1,NM_001033756.2,NM_001025368.2,NM_001025367.2,NM_003376.5,NM_001025366.2,NM_001171627.1,NM_001025369.2
SERPINE2	PH_hs_0001899	5928	7690	18024	22386	3.74665e-07	3.52751e-07	3.1342e-07	1.49047e-05	0	0	0	0	1.6798e-19	1.87606e-14	6781.95	20197.3	0.111654	0.132112	1.14011	9.10511e-05	serpin peptidase inhibitor, clade E (nexin, plasminogen activator inhibitor type 1), member 2	NM_001136530.1,NM_001136528.1,NM_006216.3,NR_073116.1
NOTCH2	PH_hs_0000871	141	194	507	600	0.000136624	4.8351e-05	3.76102e-06	2.70091e-06	0	0	0	0	8.20135e-12	1.78848e-17	166.594	553.337	0.14848	0.11868	1.1393	6.46545e-05	notch 2	NM_024408.3
HIST1H2BD	PH_hs_0010698	121	136	426	414	0.000227993	0.000154802	5.50272e-06	5.87936e-06	0	0	0	0	2.72794e-22	2.8944e-29	128.445	420.028	0.103742	0.0895343	1.13905	4.53415e-07	histone cluster 1, H2bd	NM_138720.2
JMJD6	PH_hs_0044386	1018	1312	3785	3571	1.18648e-06	8.86766e-07	4.3396e-07	4.44474e-07	0	0	0	0	4.59701e-19	5.05073e-30	1160.56	3678.44	0.113065	0.0883162	1.13905	3.5842e-07	jumonji domain containing 6	NM_015167.2
CDV3	PH_hs_0032486	1470	2101	5051	5948	7.92798e-07	5.94013e-07	3.92624e-07	3.74331e-07	0	0	0	0	1.93501e-13	8.1859e-20	1774.19	5497.93	0.13774	0.110678	1.13777	1.40602e-05	CDV3 homolog (mouse)	NM_017548.4,NM_001134423.1,NM_001134422.1
BACH1	PH_hs_0009287	373	436	1286	1370	7.55069e-06	5.21865e-06	9.05479e-07	1.35171e-06	0	0	0	0	3.51106e-26	9.5948e-30	403.933	1327.86	0.0950613	0.0887581	1.13748	1.18576e-09	BTB and CNC homology 1, basic leucine zipper transcription factor 1	NM_206866.1,NM_001186.2
IRF1	PH_hs_0010683	61	90	257	284	0.00211591	0.000616562	0.00107262	1.55235e-05	-50	0	0	0	4.99731e-08	2.15886e-16	74.9641	270.454	0.187729	0.123012	1.13681	0.000104293	interferon regulatory factor 1	NM_002198.2
MKRN3	PH_hs_0042156	93	104	310	324	0.00527476	0.000378291	0.28006	1.0835e-05	0	0	0	0	8.4446e-16	0.0106992	98.4701	316.979	0.125592	0.434616	1.1347	2.28698e-07	makorin ring finger protein 3	NM_005664.3
ATP1B3	PH_hs_0043261	4197	7595	15492	18422	4.17101e-07	3.53608e-07	3.17991e-07	3.1282e-07	0	0	0	0	1.34643e-07	3.28837e-19	5825.88	16951.9	0.19441	0.112589	1.13125	0.00116114	ATPase, Na+/K+ transporting, beta 3 polypeptide	NM_001679.2
NACC1	PH_hs_0049404	244	582	1119	1580	2.3995e-05	2.86054e-06	1.05704e-06	7.42366e-07	0	0	0	0	9.65605e-05	1.39347e-10	405.595	1348.67	0.268251	0.158474	1.12887	0.0195619	nucleus accumbens associated 1, BEN and BTB (POZ) domain containing	NM_052876.3
NAB1	PH_hs_0005968	563	720	2034	2073	3.04724e-06	1.96121e-06	6.07592e-07	5.99565e-07	0	0	0	0	8.82278e-19	4.27973e-40	639.176	2053.46	0.114007	0.0757469	1.1287	5.08254e-08	NGFI-A binding protein 1 (EGR1 binding protein 1)	NM_005966.3
KRTAP1-5	PH_hs_0015814	124	142	423	441	0.000210345	0.000133275	5.59143e-06	5.08498e-06	0	0	0	0	7.25483e-21	1.15088e-29	132.881	431.973	0.107567	0.0888846	1.12774	1.8521e-08	keratin associated protein 1-5	NM_031957.1
HBEGF	PH_hs_0000094	210	304	799	877	3.78138e-05	0.000114274	1.66297e-06	1.44972e-06	0	0	0	0	3.02358e-10	4.45629e-25	255.293	837.868	0.161572	0.0973012	1.12678	3.14684e-05	heparin-binding EGF-like growth factor	NM_001945.2
GARS	PH_hs_0015272	412	577	1555	1623	5.95006e-06	2.90773e-06	7.52967e-07	7.25166e-07	0	0	0	0	2.72962e-13	2.92652e-34	491.612	1588.9	0.138632	0.0823157	1.12611	4.70686e-06	glycyl-tRNA synthetase	NM_002047.2
IKZF5	PH_hs_0044305	145	153	506	497	0.000124513	0.000104157	0.2233	3.92068e-06	0	0	0	0	6.59229e-21	0.00180009	149.17	501.523	0.107449	0.343498	1.12087	0.0306976	IKAROS family zinc finger 5 (Pegasus)	NM_001271840.1,NR_073479.1,NR_073478.1,NR_073477.1,NR_073475.1,NR_073476.1
ADORA2B	PH_hs_0028884	5	99	251	347	0.39079	0.000562013	2.2037e-05	9.05757e-06	-50	0	0	0	0.0536617	4.69868e-10	49.7845	298.828	0.620987	0.163417	1.11905	0.000190556	adenosine A2b receptor	NM_000676.2
HIST1H4J|HIST1H4K	PH_hs_0062241	370	460	1329	1352	7.75679e-06	4.73871e-06	8.75202e-07	2.66489e-06	0	0	0	0	6.39487e-20	1.23334e-37	413.785	1340.48	0.110349	0.0783193	1.11901	1.20806e-07	histone cluster 1, H4j|histone cluster 1, H4k	NM_021968.3|NM_003541.2
TOM1	PH_hs_0000980	563	825	2035	2364	3.07458e-06	1.58463e-06	6.07377e-07	5.6593e-07	0	0	0	0	6.29138e-12	1.51593e-20	689.188	2198.93	0.147637	0.108485	1.11846	3.15147e-05	target of myb1 (chicken)	NR_024195.1,NR_024194.1,NM_001135732.1,NM_001135730.1,NM_001135729.1,NM_005488.2
CSGALNACT2	PH_hs_0061876	239	240	767	812	2.55124e-05	2.68529e-05	1.77233e-06	1.62338e-06	0	0	0	0	1.32977e-19	7.01086e-30	240.07	789.428	0.111334	0.0885412	1.1148	1.76073e-06	chondroitin sulfate N-acetylgalactosaminyltransferase 2	NM_018590.4
TGIF1	PH_hs_0044250	3700	4651	11993	12237	4.37944e-07	4.02492e-07	3.27665e-07	3.26801e-07	0	0	0	0	3.93635e-22	1.29284e-41	4162.14	12114.7	0.10415	0.0742782	1.11474	6.16272e-09	TGFB-induced factor homeobox 1	NM_170695.2,NM_003244.2,NM_173211.1,NM_173210.1,NM_173209.1,NM_174886.1,NM_173208.1,NM_173207.1
IL36RN	PH_hs_0045194	442	523	1539	1555	5.06028e-06	3.5305e-06	7.60015e-07	7.52977e-07	0	0	0	0	1.9628e-25	1.24912e-41	481.677	1546.99	0.0965612	0.0742642	1.11331	2.44027e-09	interleukin 36 receptor antagonist	NM_173170.1,NM_012275.2
SPTY2D1	PH_hs_0032836	80	91	260	277	0.00173167	0.0327474	2.00876e-05	1.66024e-05	0	0	0	0	1.55571e-09	5.33537e-24	85.4379	268.472	0.168759	0.0996489	1.11226	7.04158e-05	SPT2, Suppressor of Ty, domain containing 1 (S. cerevisiae)	NM_194285.2
ELOVL7	PH_hs_0014130	333	363	1133	1120	1.00715e-05	8.08998e-06	1.92694e-06	8.82221e-06	0	0	0	0	1.09381e-31	7.45805e-33	348.116	1126.54	0.085807	0.0841703	1.10801	6.13736e-07	ELOVL fatty acid elongase 7	NM_001104558.1,NM_024930.2
UGCG	PH_hs_0020019	887	904	3007	2634	1.42686e-06	4.14359e-06	4.81044e-07	4.16422e-06	0	0	0	0	5.53113e-25	6.66527e-20	897.299	2821.22	0.097499	0.110404	1.10445	3.2143e-05	UDP-glucose ceramide glucosyltransferase	NM_003358.1
AKR1C1|AKR1C3|LOC101060798|AKR1C4	PH_hs_0029660	3531	4422	11296	11678	4.46615e-07	4.09423e-07	3.3035e-07	3.2959e-07	0	0	0	0	1.76237e-22	2.59119e-38	3964.15	11486.5	0.103263	0.0775847	1.10428	5.57599e-09	aldo-keto reductase family 1, member C1|aldo-keto reductase family 1, member C3|aldo-keto reductase family 1 member C2-like|aldo-keto reductase family 1, member C4	NM_001353.5|NM_001253908.1,NM_003739.5|XM_003960854.1,XM_003960853.1,XM_003960852.1|NM_001818.3
ZBTB21	PH_hs_0033472	188	220	634	692	7.62852e-05	3.29635e-05	2.44063e-06	2.09549e-06	0	0	0	0	1.08699e-21	3.90466e-25	203.708	662.903	0.105304	0.0971808	1.10424	4.53536e-08	zinc finger and BTB domain containing 21	NM_001098403.1,NM_001098402.1,NM_020727.4
FOLR3	PH_hs_0027518	112	162	391	448	0.000826542	8.63244e-05	0.30562	4.90957e-06	0	0	0	0	1.67468e-09	0.0219518	136.093	419.401	0.169105	0.496275	1.10191	0.000265211	folate receptor 3 (gamma)	NM_000804.2
ABHD5	PH_hs_0049315	95	139	280	356	0.00562913	0.46019	1.61273e-05	8.80193e-06	0	0	0	0	0.366055	9.13111e-13	116.193	317.865	2.92125	0.141901	1.09666	0.000142049	abhydrolase domain containing 5	NM_016006.4
RBM42	PH_hs_0000523	103	152	397	407	0.000488605	0.000106693	6.49283e-06	6.12278e-06	0	0	0	0	3.56584e-09	5.26796e-32	126.594	401.987	0.172777	0.0853523	1.0956	0.000522558	RNA binding motif protein 42	NM_024321.3
UBE2H	PH_hs_0018037	113	168	410	484	0.000286931	7.70284e-05	6.02047e-06	4.15141e-06	0	0	0	0	2.7907e-09	3.4013e-17	139.477	446.87	0.171561	0.119755	1.09467	0.000720837	ubiquitin-conjugating enzyme E2H	NM_001202498.1,NM_182697.2,NM_003344.3
ST20|BCL2A1	PH_hs_0062121	156	280	677	705	9.77275e-05	1.61907e-05	2.17674e-06	2.03347e-06	0	0	0	0	8.90623e-07	3.79372e-32	215.448	690.958	0.209346	0.0851504	1.09302	0.00289475	suppressor of tumorigenicity 20|BCL2-related protein A1	NM_001199757.1,NM_001100880.2,NM_001100879.1,NR_037653.1,NR_037652.1|NM_001114735.1,NM_004049.3
SNX16	PH_hs_0060597	35	86	236	270	0.00976094	0.000711145	2.64485e-05	0.000187448	-50	0	0	0	0.000796298	1.22817e-15	59.3781	252.941	0.31673	0.126329	1.09262	4.98637e-05	sorting nexin 16	NM_022133.3,NM_152836.2,NM_152837.2
FOXC1	PH_hs_0049172	401	534	1365	1495	6.33774e-06	0.0564014	8.71789e-07	7.80793e-07	0	0	0	0	5.0813e-06	2.3651e-26	465.343	1429.78	0.226568	0.0947266	1.09199	0.00124491	forkhead box C1	NM_001453.2
RPL28	PH_hs_0017279	312	480	1110	1403	1.1961e-05	4.22091e-06	1.06712e-06	8.30162e-07	0	0	0	0	5.38687e-10	1.1748e-14	392.793	1255.98	0.164002	0.131064	1.08658	0.000498161	ribosomal protein L28	NM_001136135.1,NM_000991.4,NM_001136134.1
GPRC5A	PH_hs_0011503	2274	2658	7094	7391	5.63562e-07	5.13327e-07	3.58802e-07	3.55632e-07	0	0	0	0	3.89788e-31	2.26838e-36	2462.54	7242.05	0.0866152	0.0797478	1.08624	8.2359e-11	G protein-coupled receptor, family C, group 5, member A	NM_003979.3
SLC25A32	PH_hs_0049099	147	215	551	597	0.000119228	3.51309e-05	3.17996e-06	2.75361e-06	0	0	0	0	3.54356e-10	1.46019e-25	179.753	573.923	0.162229	0.0962984	1.08597	0.000195997	solute carrier family 25 (mitochondrial folate carrier) , member 32	NM_030780.3
ZEB2	PH_hs_0028851	465	505	1415	1661	4.52182e-06	3.80119e-06	8.22258e-07	7.10963e-07	0	0	0	0	2.8118e-33	1.9939e-19	485.206	1537.57	0.0835985	0.111891	1.08527	1.47198e-06	zinc finger E-box binding homeobox 2	NM_001171653.1,NM_014795.3
CEBPB	PH_hs_0005496	8008	10384	24200	26546	1.87332e-06	3.34445e-07	3.06536e-07	3.04606e-07	0	0	0	0	6.75707e-19	1.0898e-27	9159.56	25369	0.113619	0.092235	1.08521	4.36063e-07	CCAAT/enhancer binding protein (C/EBP), beta	NM_005194.3
GTF3C3	PH_hs_0062012	153	293	607	816	0.000104199	1.41945e-05	2.64239e-06	1.61151e-06	0	0	0	0	4.22945e-06	9.57691e-12	220.062	711.127	0.224556	0.14898	1.08492	0.00891427	general transcription factor IIIC, polypeptide 3, 102kDa	NM_001206774.1
NFKBIB	PH_hs_0030976	586	663	1932	1971	2.82347e-06	2.25592e-06	6.30707e-07	6.21512e-07	0	0	0	0	2.16904e-33	9.73202e-40	624.13	1951.45	0.0834483	0.0761044	1.08483	5.98399e-09	nuclear factor of kappa light polypeptide gene enhancer in B-cells inhibitor, beta	NR_040515.1
ZFAND6|ATP8B5P	PH_hs_0062192	714	1450	2856	3708	1.98869e-06	8.03321e-07	4.93836e-07	4.39622e-07	0	0	0	0	4.50025e-06	8.58246e-14	1066.33	3280.48	0.225231	0.1357	1.08387	0.00718184	zinc finger, AN1-type domain 6|ATPase, class I, type 8B, member 5, pseudogene	NM_001242917.1,NM_001242915.1,NM_019006.3,NM_001242916.1,NM_001242914.1,NM_001242913.1,NM_001242912.1,NM_001242911.1,NM_001242919.1,NM_001242918.1|NR_003582.1
TNC	PH_hs_0035499	162	224	606	621	8.63521e-05	3.10019e-05	2.65034e-06	2.53397e-06	0	0	0	0	5.2062e-12	1.28193e-34	191.933	613.481	0.147044	0.0818621	1.08337	4.14323e-05	tenascin C	NM_002160.3
UBTD2	PH_hs_0049463	111	156	408	493	0.427283	0.245115	0.0253397	3.9909e-06	0	0	0	0	0.225576	7.64332e-09	132.709	450.35	1.32715	0.176731	1.07984	0.0988901	ubiquitin domain containing 2	NM_152277.2
ZNF259	PH_hs_0000733	194	368	765	1006	4.83319e-05	7.80772e-06	1.79085e-06	1.20481e-06	0	0	0	0	2.48535e-06	1.07625e-12	277.358	885.07	0.219009	0.142364	1.07378	0.00691632	zinc finger protein 259	NM_003904.3
TNFSF9	PH_hs_0000203	501	602	1551	1899	4.02288e-06	2.8071e-06	7.54696e-07	6.38882e-07	0	0	0	0	4.82307e-24	1.35737e-16	550.35	1724.39	0.0995501	0.122169	1.07149	4.75373e-06	tumor necrosis factor (ligand) superfamily, member 9	NM_003811.3
RMND5A	PH_hs_0027152	559	605	1829	1790	3.08993e-06	2.68274e-06	6.57476e-07	6.68701e-07	0	0	0	0	1.18609e-33	7.24178e-36	582.297	1809.6	0.0831021	0.0803393	1.07117	3.67223e-07	required for meiotic nuclear division 5 homolog A (S. cerevisiae)	NM_022780.3
HES4	PH_hs_0027889	68	81	235	232	0.403557	0.00102662	4.66582e-05	2.78331e-05	-50	0	0	0	0.160539	1.24437e-26	74.3607	233.509	1.00782	0.0941901	1.07096	1.60235e-05	hairy and enhancer of split 4 (Drosophila)	NM_001142467.1,NM_021170.3
ABTB2	PH_hs_0024156	267	361	960	1012	1.84536e-05	1.47891e-05	1.28059e-06	1.19547e-06	0	0	0	0	9.0552e-14	2.91549e-31	312.435	985.918	0.135832	0.0864285	1.06847	5.55567e-06	ankyrin repeat and BTB (POZ) domain containing 2	NM_145804.2
SMCR7L	PH_hs_0043142	101	141	341	473	0.000428058	0.0001787	9.53222e-06	0.0104574	0	0	0	0	2.45899e-10	1.48728e-06	120.303	406.764	0.160728	0.214015	1.06767	0.0274526	Smith-Magenis syndrome chromosome region, candidate 7-like	NM_019008.4
GFPT1	PH_hs_0000227	191	252	704	693	5.09522e-05	2.17954e-05	2.03575e-06	2.36438e-06	0	0	0	0	2.75035e-14	6.5067e-34	220.528	698.53	0.132988	0.082762	1.06764	1.36779e-05	glutamine--fructose-6-phosphate transaminase 1	NM_001244710.1,NM_002056.3
RPSA	PH_hs_0045767	49	84	209	279	0.262525	0.000768416	3.82952e-05	1.62934e-05	-50	0	0	0	0.0101657	1.06877e-10	65.7921	243.875	0.431002	0.157453	1.06748	0.000241598	ribosomal protein SA	NM_002295.4,NM_001012321.1
NFKBIA	PH_hs_0004662	20620	22032	55596	55126	3.09938e-07	3.084e-07	2.95109e-07	3.21319e-06	0	0	0	0	8.71077e-37	2.07639e-37	21343.7	55362.6	0.0792697	0.0785693	1.06725	7.67675e-07	nuclear factor of kappa light polypeptide gene enhancer in B-cells inhibitor, alpha	NM_020529.2
LOC100506737	PH_hs_0012225	126	146	419	430	0.000199564	0.00012159	5.72609e-06	5.3859e-06	0	0	0	0	4.88104e-20	3.50711e-32	135.839	424.486	0.109992	0.0851022	1.06692	2.58863e-07	uncharacterized LOC100506737	XR_172388.1,XR_109732.2,XR_112260.2
HIST1H4E	PH_hs_0034759	122	130	392	401	0.000879479	0.000182864	0.20465	6.3376e-06	0	0	0	0	2.61185e-18	0.000627751	126.113	396.489	0.115629	0.309985	1.06619	0.0461191	histone cluster 1, H4e	NM_003545.3
WIPI2	PH_hs_0060984	120	166	435	457	0.000234375	0.000123161	5.24611e-06	0.369974	0	0	0	0	5.3405e-11	0.100348	142.208	445.966	0.154871	0.78151	1.06513	0.000125719	WD repeat domain, phosphoinositide interacting 2	NM_001033520.1,NM_001033519.1,NM_016003.3,NM_015610.3,NM_001033518.1
SMCR8	PH_hs_0048920	337	566	1158	1698	9.76074e-06	3.016e-06	1.01596e-06	6.98008e-07	0	0	0	0	2.96228e-08	1.22925e-09	446.909	1427.03	0.184466	0.167667	1.06431	0.00458326	Smith-Magenis syndrome chromosome region, candidate 8	NM_144775.2
ICAM1	PH_hs_0024395	126	147	431	420	0.000199043	0.000118886	5.36101e-06	5.69616e-06	0	0	0	0	1.62272e-19	9.32335e-30	136.315	425.526	0.111607	0.0887382	1.06409	2.41435e-06	intercellular adhesion molecule 1	NM_000201.2
EIF5	PH_hs_0030187	447	776	1890	1823	4.93305e-06	1.7525e-06	6.41427e-07	6.59216e-07	0	0	0	0	7.4303e-08	4.90321e-33	604.812	1856.65	0.190321	0.083923	1.06335	0.0013444	eukaryotic translation initiation factor 5	NM_183004.4,NM_001969.4
MRFAP1L1	PH_hs_0030756	238	357	893	777	3.61131e-05	0.300186	5.45565e-05	1.73616e-06	0	0	0	0	0.055682	1.23267e-16	295.27	835.224	0.628104	0.121996	1.05946	0.000208531	Morf4 family associated protein 1-like 1	NM_203462.2
HIST1H2AM	PH_hs_0060028	40	85	230	256	0.278846	0.00895483	2.85788e-05	2.08147e-05	-50	0	0	0	0.0188225	2.18329e-19	61.5327	242.956	0.48107	0.112016	1.05866	1.92595e-05	histone cluster 1, H2am	NM_003514.2
GLRX	PH_hs_0045444	1013	1728	3309	5013	1.19395e-06	6.8796e-07	4.59611e-07	3.93006e-07	0	0	0	0	2.0752e-08	4.35078e-09	1356.07	4157.93	0.182338	0.173784	1.05812	0.0055814	glutaredoxin (thioltransferase)	NM_001118890.1,NM_002064.2,NM_001243659.1,NM_001243658.1
ATXN2L	PH_hs_0045963	1223	2032	4089	5550	9.55601e-07	6.08011e-07	4.21137e-07	3.81445e-07	0	0	0	0	5.92717e-09	4.19545e-12	1611.36	4816.89	0.175383	0.146376	1.05789	0.00207423	ataxin 2-like	NM_017492.3,NM_148416.2,NM_145714.2,NM_148415.2,NM_148414.2,NM_007245.3
ARMCX1	PH_hs_0001004	48	89	184	349	0.00425275	0.00063433	5.75236e-05	8.92238e-06	-50	0	0	0	2.57453e-05	1.73518e-05	67.6474	266.201	0.246989	0.241535	1.05683	0.0110031	armadillo repeat containing, X-linked 1	NM_016608.1
TEAD1	PH_hs_0049075	105	247	484	594	0.000366198	2.31394e-05	4.14925e-06	2.77551e-06	0	0	0	0	0.000148726	2.82521e-15	172.895	538.806	0.276433	0.128016	1.05567	0.0337153	TEA domain family member 1 (SV40 transcriptional enhancer factor)	NM_021961.5
SERPIND1	PH_hs_0000198	343	556	1557	1559	0.312765	3.12252e-06	7.52563e-07	7.51247e-07	0	0	0	0	0.0261128	7.49358e-41	445.303	1558.02	0.515127	0.0750049	1.05561	0.0214188	serpin peptidase inhibitor, clade D (heparin cofactor), member 1	NM_000185.3
AGFG1	PH_hs_0023955	373	721	1583	2029	7.54944e-06	1.95662e-06	7.41109e-07	0.0499235	0	0	0	0	2.04092e-06	1.14002e-05	539.678	1805.21	0.217053	0.236097	1.05554	0.00210442	ArfGAP with FG repeats 1	NM_001135189.1,NM_001135188.1,NM_001135187.1,NM_004504.4
SYPL1	PH_hs_0004649	863	1519	3383	3605	1.48366e-06	5.84377e-06	4.65896e-07	8.56041e-06	0	0	0	0	1.61456e-07	5.35733e-28	1177.59	3493.64	0.195712	0.0916873	1.05535	0.00264366	synaptophysin-like 1	NM_006754.3,NM_182715.2
SLC2A3	PH_hs_0025111	347	450	1190	1182	9.05345e-06	0.152531	9.85071e-07	9.92436e-07	0	0	0	0	0.000597881	4.71041e-38	396.92	1186.03	0.308653	0.0778637	1.05432	0.00830522	solute carrier family 2 (facilitated glucose transporter), member 3	NM_006931.2
CHD1L|LOC101060601	PH_hs_0025208	102	196	433	477	0.000408215	6.47331e-05	5.32427e-06	1.59123e-05	0	0	0	0	9.79767e-06	1.0937e-21	147.025	454.926	0.234222	0.105311	1.05089	0.0151654	chromodomain helicase DNA binding protein 1-like|chromodomain-helicase-DNA-binding protein 1-like	NR_046070.1,NM_001256338.1,NM_001256337.1,NM_024568.2,NM_001256336.1,NM_004284.4|XM_003960217.1,XM_003960216.1,XM_003960215.1,XM_003960214.1,XM_003960213.1,XM_003960212.1,XM_003960211.1,XM_003960210.1,XM_003960209.1,XM_003960208.1,XM_003960207.1,XM_003960206.1
C6orf48	PH_hs_0006057	550	847	1743	2603	3.18957e-06	1.52573e-06	6.83298e-07	5.28546e-07	0	0	0	0	2.03092e-10	2.602e-09	692.826	2171.45	0.159958	0.171218	1.05017	0.00284018	chromosome 6 open reading frame 48	NM_001040438.1,NM_001040437.1
LUC7L3	PH_hs_0044688	186	336	671	969	5.52502e-05	9.83625e-06	2.20872e-06	1.2649e-06	0	0	0	0	7.83206e-07	8.55469e-10	257.906	819.465	0.208222	0.166027	1.04876	0.00885713	LUC7-like 3 (S. cerevisiae)	NM_016424.4,NM_006107.3
RIOK2	PH_hs_0002395	178	222	593	654	6.48424e-05	3.18069e-05	2.75973e-06	2.31077e-06	0	0	0	0	5.66763e-17	9.05544e-24	199.399	623.397	0.120629	0.100171	1.04724	2.81295e-06	RIO kinase 2	NM_018343.2
SBDS|SBDSP1	PH_hs_0031526	2282	3446	6684	9998	5.6229e-07	4.52185e-07	3.63685e-07	3.36417e-07	0	0	0	0	1.55795e-11	2.07769e-09	2842.08	8335.04	0.15058	0.170129	1.04687	0.00260752	Shwachman-Bodian-Diamond syndrome|Shwachman-Bodian-Diamond syndrome pseudogene 1	NM_016038.2|NR_024111.1,NR_024110.1
AMMECR1L	PH_hs_0030716	643	906	2238	2464	2.38012e-06	1.60115e-06	5.69399e-07	0.00192802	0	0	0	0	1.77337e-13	6.33843e-16	769.863	2350.62	0.137517	0.125036	1.04545	0.00325209	AMMECR1-like	NM_031445.2,NM_001199140.1
CD55	PH_hs_0024773	728	807	2322	2319	1.92931e-06	1.64042e-06	5.56125e-07	5.56577e-07	0	0	0	0	9.51391e-39	4.03238e-41	767.435	2320.54	0.0771237	0.0747462	1.04247	1.09547e-07	CD55 molecule, decay accelerating factor for complement (Cromer blood group)	NM_001114752.1,NM_000574.3
CD109	PH_hs_0048119	78	115	222	374	0.000996562	0.000270967	4.8854e-05	7.51608e-06	0	0	0	0	1.26406e-08	1.27631e-06	95.8167	297.725	0.179491	0.21259	1.04183	0.0118995	CD109 molecule	NM_001159588.1,NM_001159587.1,NM_133493.3
LOC286177	PH_hs_0018746	138	159	441	476	0.00014723	9.18025e-05	5.09045e-06	4.30126e-06	0	0	0	0	3.18756e-21	3.43047e-25	148.345	458.442	0.106569	0.0970632	1.04074	2.98783e-07	uncharacterized LOC286177	NR_038874.1
GLT25D1	PH_hs_0025103	391	632	1329	1816	6.73129e-06	2.77588e-06	8.75141e-07	6.61151e-07	0	0	0	0	4.8327e-09	1.26004e-11	506.759	1571.63	0.174322	0.149876	1.04068	0.00245046	glycosyltransferase 25 domain containing 1	NM_024656.2
CYP1B1	PH_hs_0009308	7234	8789	23311	20123	3.57272e-07	3.43801e-07	3.07171e-07	3.13149e-07	0	0	0	0	3.66802e-26	3.77139e-20	7992.6	21723.1	0.0950985	0.109654	1.04055	9.35655e-06	cytochrome P450, family 1, subfamily B, polypeptide 1	NM_000104.3
MARCH3	PH_hs_0031616	43	80	211	241	0.00578074	0.00132989	3.7243e-05	2.48429e-05	-50	0	0	0	4.47711e-05	3.11246e-17	60.7298	225.948	0.255277	0.119605	1.04035	1.43627e-05	membrane-associated ring finger (C3HC4) 3, E3 ubiquitin protein ligase	NM_178450.3
SUCO	PH_hs_0006014	128	157	441	437	0.000208275	0.000106282	8.81153e-05	5.19593e-06	0	0	0	0	3.41722e-16	5.72016e-28	142.13	439.013	0.123863	0.0917374	1.03905	0.000133865	SUN domain containing ossification factor	NM_016227.2,NM_014283.3
NGF	PH_hs_0000342	52	139	383	417	0.384696	0.000147599	7.07962e-06	5.79013e-06	-50	0	0	0	0.0811991	1.23357e-23	93.5671	399.943	0.715794	0.10048	1.03663	2.91302e-07	nerve growth factor (beta polypeptide)	NM_002506.2
DCP1A	PH_hs_0024135	151	206	491	615	0.000108765	4.00358e-05	4.02245e-06	2.57923e-06	0	0	0	0	2.76532e-12	2.66691e-14	177.571	552.78	0.145112	0.132917	1.03631	0.000353712	DCP1 decapping enzyme homolog A (S. cerevisiae)	NM_018403.5
WARS	PH_hs_0027714	904	1056	2904	2938	1.38928e-06	0.00119962	5.23085e-07	4.86728e-07	0	0	0	0	5.11861e-19	1.37327e-42	978.641	2920.98	0.113218	0.0733808	1.03594	5.69404e-07	tryptophanyl-tRNA synthetase	NM_213646.1,NM_213645.1,NM_173701.1,NM_004184.3
ARID5B	PH_hs_0043352	536	687	1833	1889	0.0138595	2.1222e-06	9.82768e-07	6.41404e-07	0	0	0	0	1.04171e-10	1.02624e-36	609.252	1860.92	0.157355	0.079351	1.0359	0.000126743	AT rich interactive domain 5B (MRF1-like)	NM_032199.2,NM_001244638.1
TNFRSF10B	PH_hs_0061494	407	440	1197	1317	0.396684	5.11173e-06	9.78531e-07	8.83339e-07	0	0	0	0	0.151731	1.37494e-25	423.728	1256.8	0.971782	0.0962452	1.03533	0.0297052	tumor necrosis factor receptor superfamily, member 10b	NR_027140.1,NM_147187.2,NM_003842.4
LATS2	PH_hs_0042228	228	253	745	749	2.93357e-05	2.1567e-05	1.85556e-06	1.8398e-06	0	0	0	0	5.12811e-30	5.70542e-39	240.473	747.003	0.0883266	0.0768916	1.03491	2.1408e-07	LATS, large tumor suppressor, homolog 2 (Drosophila)	NM_014572.2
ASS1	PH_hs_0043757	92	208	398	512	0.000569769	3.88661e-05	6.45566e-06	3.68562e-06	0	0	0	0	0.000109745	6.92047e-13	147.479	454.797	0.270602	0.141131	1.03452	0.0352996	argininosuccinate synthase 1	NM_000050.4,NM_054012.3
MRPL10	PH_hs_0016744	92	141	269	460	0.000569232	0.000136495	1.8037e-05	4.62994e-06	0	0	0	0	2.59535e-08	1.37074e-06	115.567	364.155	0.183666	0.213252	1.0343	0.0159143	mitochondrial ribosomal protein L10	NM_148887.2,NM_145255.3,NR_037575.1
CEBPG	PH_hs_0000293	57	123	350	350	0.00258466	0.000216739	8.85928e-06	1.06419e-05	-50	0	0	0	0.000125895	1.54569e-32	88.5772	350.005	0.273192	0.0846052	1.03398	1.95261e-06	CCAAT/enhancer binding protein (C/EBP), gamma	NM_001252296.1,NM_001806.3
CDR2L	PH_hs_0004520	445	536	1457	1519	5.07067e-06	3.35766e-06	1.05958e-06	7.69143e-07	0	0	0	0	1.90494e-23	5.25709e-34	489.448	1487.91	0.10092	0.0826421	1.03264	2.91431e-08	cerebellar degeneration-related protein 2-like	NM_014603.2
UTP15	PH_hs_0048854	334	492	1090	1445	9.99038e-06	4.00521e-06	1.09071e-06	8.06207e-07	0	0	0	0	2.98373e-11	1.32808e-12	410.084	1266.87	0.152799	0.142963	1.03144	0.000845889	UTP15, U3 small nucleolar ribonucleoprotein, homolog (S. cerevisiae)	NM_032175.2
DGKG	PH_hs_0048353	88	149	297	300	0.000659397	0.218994	0.427958	1.33172e-05	0	0	0	0	0.0227708	0.233844	117.273	298.499	0.500096	1.37694	1.03042	0.0576459	diacylglycerol kinase, gamma 90kDa	NM_001080745.1,NM_001080744.1,NM_001346.2
TMEM209	PH_hs_0013707	251	357	899	1001	2.20377e-05	8.42316e-06	1.40012e-06	0.0687142	0	0	0	0	5.7154e-12	8.42865e-07	302.111	949.826	0.147336	0.208862	1.02779	0.0291419	transmembrane protein 209	NM_032842.3
ZRANB1	PH_hs_0002321	489	617	1664	1659	4.05748e-06	2.564e-06	7.09884e-07	7.11686e-07	0	0	0	0	1.65034e-19	6.20049e-40	551.18	1661.53	0.11163	0.0759076	1.02676	6.68667e-07	zinc finger, RAN-binding domain containing 1	NM_017580.2
ASB6	PH_hs_0007050	61	114	291	353	0.0187507	0.000280015	1.4465e-05	8.6667e-06	-50	0	0	0	4.69687e-05	6.87198e-15	86.3952	321.891	0.256033	0.129892	1.02667	2.71761e-05	ankyrin repeat and SOCS box containing 6	NM_001202403.1,NM_177999.2,NM_017873.3
GATAD2A	PH_hs_0048514	501	932	1965	2256	3.85515e-06	1.33226e-06	6.22865e-07	5.66479e-07	0	0	0	0	6.14172e-07	1.3632e-21	707.528	2110	0.206143	0.105566	1.02621	0.00378633	GATA zinc finger domain containing 2A	NM_017660.3
ODC1	PH_hs_0043204	1023	1047	3066	3057	2.99186e-05	1.1454e-06	4.76447e-07	4.77155e-07	0	0	0	0	2.98439e-23	3.67757e-41	1036.97	3061.56	0.10138	0.074708	1.02393	2.64995e-06	ornithine decarboxylase 1	NM_002539.1
SETD6	PH_hs_0061276	104	198	380	534	0.000378625	0.000104091	7.22028e-06	3.38718e-06	0	0	0	0	9.65649e-06	4.37349e-10	149.03	456.724	0.234045	0.163112	1.02358	0.0199231	SET domain containing 6	NM_001160305.1,NM_024860.2
BICD2	PH_hs_0049349	383	638	1143	2158	7.10747e-06	2.41432e-06	1.03287e-06	6.08635e-07	0	0	0	0	1.78632e-08	6.09255e-06	505.407	1648.66	0.181463	0.228611	1.0232	0.0225284	bicaudal D homolog 2 (Drosophila)	NM_015250.3,NM_001003800.1
SLC38A1	PH_hs_0037464	1327	1776	4444	4439	8.76487e-07	6.74005e-07	4.08738e-07	4.08883e-07	0	0	0	0	1.00701e-16	4.08899e-42	1544.15	4441.57	0.121636	0.0738133	1.02316	2.6672e-06	solute carrier family 38, member 1	NM_001077484.1,NM_030674.3
GPR176	PH_hs_0060947	1096	1202	3386	3371	1.08338e-06	9.74034e-07	4.5687e-07	4.61915e-07	0	0	0	0	1.47602e-39	6.99108e-41	1149.21	3378.57	0.0762876	0.0749758	1.02315	1.03853e-07	G protein-coupled receptor 176	NM_001271855.1,NM_001271854.1,NM_007223.2
SEC24A	PH_hs_0041056	260	377	941	991	2.26611e-05	7.36868e-06	0.223109	1.22813e-06	0	0	0	0	2.26044e-11	0.00148324	316.372	965.921	0.151839	0.336565	1.02308	4.92708e-05	SEC24 family, member A (S. cerevisiae)	NM_021982.2
BLK	PH_hs_0042423	300	741	1441	1632	1.32991e-05	1.87256e-06	8.08829e-07	7.22545e-07	0	0	0	0	0.000132836	1.26217e-22	510.792	1536.17	0.274224	0.102901	1.02299	0.0279008	B lymphoid tyrosine kinase	NM_001715.2
ZNF586	PH_hs_0024053	157	215	564	569	9.57521e-05	3.50719e-05	3.03691e-06	2.98516e-06	0	0	0	0	2.93862e-12	1.78459e-37	185.015	566.499	0.145294	0.0784963	1.02242	9.55501e-05	zinc finger protein 586	NM_017652.3,NM_001077426.2,NM_001204814.1
STAT2	PH_hs_0048578	204	310	742	819	4.13733e-05	1.2181e-05	1.87342e-06	1.60472e-06	0	0	0	0	8.53806e-10	2.94975e-24	254.994	780.369	0.166018	0.0990731	1.02106	0.00045229	signal transducer and activator of transcription 2, 113kDa	NM_198332.1,NM_005419.3
GPN1	PH_hs_0027089	220	414	833	1086	3.27359e-05	5.88294e-06	1.56215e-06	1.09554e-06	0	0	0	0	1.76238e-06	4.30296e-13	312.948	959.049	0.215629	0.139838	1.02058	0.00843358	GPN-loop GTPase 1	NM_001145049.1,NM_001145048.1,NM_001145047.1,NM_007266.3,NR_026735.1
UGDH	PH_hs_0002476	1077	1371	3540	3559	1.10643e-06	2.74135e-05	4.46136e-07	4.45111e-07	0	0	0	0	1.12144e-17	1.1911e-43	1219.71	3549.51	0.117918	0.0724392	1.02041	4.76756e-07	UDP-glucose 6-dehydrogenase	NM_001184701.1,NM_001184700.1,NM_003359.3
TRIM25	PH_hs_0038946	49	83	177	295	0.00400799	0.000798895	6.47536e-05	1.39468e-05	-50	0	0	0	5.11517e-06	1.25903e-06	65.3158	235.787	0.226642	0.212465	1.01738	0.00542751	tripartite motif containing 25	NM_005082.4
ATP9A	PH_hs_0019278	435	632	1376	1853	5.24626e-06	2.46138e-06	8.46336e-07	6.50925e-07	0	0	0	0	5.52504e-12	3.92309e-12	529.911	1613.65	0.14723	0.14617	1.01657	0.000936618	ATPase, class II, type 9A	NM_006045.1
PTGR1	PH_hs_0023561	62	110	284	330	0.00202663	0.000313296	1.54782e-05	1.03164e-05	-50	0	0	0	5.98513e-06	3.23804e-17	85.0162	306.92	0.228408	0.119671	1.01651	8.88993e-06	prostaglandin reductase 1	NM_001146108.1,NM_012212.3
EIF4A1|SENP3-EIF4A1	PH_hs_0043841	3331	5707	11601	12585	4.58233e-07	3.78694e-07	3.29135e-07	3.25629e-07	0	0	0	0	1.72786e-08	3.33614e-29	4470.95	12091.4	0.18127	0.0896356	1.01609	0.00108089	eukaryotic translation initiation factor 4A1|SENP3-EIF4A1 readthrough	NM_001204510.1,NM_001416.3|NR_037926.1
NFKB2	PH_hs_0027671	95	106	296	300	0.0371661	0.473288	1.38019e-05	1.33036e-05	0	0	0	0	0.394989	1.03371e-31	100.475	297.997	3.75462	0.0857715	1.01582	0.000182369	nuclear factor of kappa light polypeptide gene enhancer in B-cells 2 (p49/p100)	NR_048560.1,NM_001261403.1,NM_002502.4,NM_001077494.2
PPP1R15B	PH_hs_0049405	343	515	1217	1352	9.32593e-06	3.64283e-06	9.7916e-07	1.34748e-06	0	0	0	0	1.00191e-10	4.19417e-24	425.775	1284.27	0.157207	0.0994139	1.01449	0.000306926	protein phosphatase 1, regulatory subunit 15B	NM_032833.3
SMG9	PH_hs_0001044	205	346	817	835	5.30083e-05	1.37888e-05	1.60797e-06	1.60157e-06	0	0	0	0	1.05643e-07	1.49043e-36	272.667	825.978	0.192711	0.079537	1.01373	0.00212716	smg-9 homolog, nonsense mediated mRNA decay factor (C. elegans)	NM_019108.2
FOXO3|FOXO3B	PH_hs_0049733	739	864	2291	2446	1.87983e-06	1.48111e-06	5.60906e-07	5.38657e-07	0	0	0	0	7.56824e-29	8.34921e-31	800.372	2368.25	0.0902267	0.0871108	1.01367	3.45405e-09	forkhead box O3|forkhead box O3B pseudogene	NM_201559.2,NM_001455.3|NR_026718.1
CCDC117	PH_hs_0024677	342	448	1188	1187	9.39992e-06	4.90951e-06	9.86894e-07	9.87901e-07	0	0	0	0	3.43035e-16	1.82928e-39	393.337	1187.52	0.12387	0.0763825	1.0135	5.72806e-06	coiled-coil domain containing 117	NM_173510.2
ZNF697	PH_hs_0048905	607	702	1937	1948	2.6432e-06	9.099e-06	6.29476e-07	6.26851e-07	0	0	0	0	5.35988e-28	1.32563e-42	653.755	1942.51	0.0916877	0.0733668	1.01172	7.81509e-08	zinc finger protein 697	NM_001080470.1
ATP5SL	PH_hs_0046077	218	320	702	947	3.3654e-05	1.11931e-05	2.0465e-06	1.36682e-06	0	0	0	0	8.94765e-11	1.01394e-11	267.124	824.062	0.156779	0.149165	1.01165	0.00141446	ATP5S-like	NM_001167870.1,NM_001167871.1,NM_018035.2,NM_001167869.1,NM_001167868.1,NM_001167867.1,NR_030765.1
TMEM159	PH_hs_0002410	2071	2084	5726	6002	5.99948e-07	5.97399e-07	3.78144e-07	3.73456e-07	0	0	0	0	1.31531e-25	5.54016e-35	2082.33	5863.57	0.0962061	0.0814087	1.01024	3.86005e-06	transmembrane protein 159	NM_020422.4
BMPR1B	PH_hs_0047336	509	566	1602	1608	3.73054e-06	3.01604e-06	7.35892e-07	7.31079e-07	0	0	0	0	5.07492e-36	1.41643e-41	537.412	1605.01	0.0801568	0.0743155	1.00957	1.45078e-07	bone morphogenetic protein receptor, type IB	NM_001256793.1,NM_001256794.1,NM_001256792.1,NM_001203.2
NBR1	PH_hs_0044529	241	306	797	863	2.48763e-05	1.26036e-05	1.66985e-06	1.48375e-06	0	0	0	0	4.61042e-17	9.1951e-27	272.558	829.89	0.120273	0.0939405	1.00929	2.67487e-06	neighbor of BRCA1 gene 1	NM_031858.2,NM_005899.3,NM_031862.2
SOCS4	PH_hs_0016858	143	224	498	608	0.000130965	3.09542e-05	3.91624e-06	2.63682e-06	0	0	0	0	1.15494e-08	1.34354e-15	181.935	552.806	0.178986	0.126508	1.00826	0.00236277	suppressor of cytokine signaling 4	NM_199421.1,NM_080867.2
HPS4	PH_hs_0025840	152	202	506	563	0.000106471	4.35288e-05	3.77913e-06	3.38991e-06	0	0	0	0	2.89752e-13	2.55976e-22	176.192	534.403	0.138788	0.103672	1.00738	7.76449e-05	Hermansky-Pudlak syndrome 4	NM_152841.2,NM_022081.5,NR_073136.1,NR_073135.1
PRSS3	PH_hs_0033374	267	382	920	1031	1.84297e-05	7.12223e-06	1.35631e-06	1.16914e-06	0	0	0	0	7.12633e-12	4.56076e-23	322.437	975.31	0.148032	0.10182	1.00719	0.000113553	protease, serine, 3	NM_001197098.1,NM_007343.3,NM_001197097.2,NM_002771.3
SPATA5L1	PH_hs_0000571	200	323	740	893	0.0252206	1.09356e-05	1.95449e-06	3.49202e-06	0	0	0	0	2.48117e-06	2.34799e-16	259.081	816.231	0.218992	0.123166	1.00682	0.00895016	spermatogenesis associated 5-like 1	NM_024063.2,NR_027635.1
LMAN1	PH_hs_0047522	167	225	581	602	7.83811e-05	3.05307e-05	2.88095e-06	2.68279e-06	0	0	0	0	5.07576e-13	2.43955e-32	195.04	591.469	0.140283	0.084881	1.00657	6.0305e-05	lectin, mannose-binding, 1	NM_005570.3
TMEM170A	PH_hs_0026484	289	338	939	958	5.40147e-05	9.68614e-06	1.31886e-06	1.28396e-06	0	0	0	0	2.46691e-23	1.46479e-37	313.056	948.478	0.101184	0.0784016	1.00578	1.42983e-07	transmembrane protein 170A	NM_145254.1
NUDT21	PH_hs_0043591	227	436	867	1113	2.97816e-05	5.2186e-06	1.49458e-06	1.06408e-06	0	0	0	0	2.74692e-06	9.15595e-14	327.11	989.562	0.220023	0.135859	1.00547	0.0100635	nudix (nucleoside diphosphate linked moiety X)-type motif 21	NM_007006.2
AEN	PH_hs_0043402	211	322	750	851	3.71639e-05	1.10647e-05	1.83571e-06	1.51399e-06	0	0	0	0	9.67643e-10	1.75768e-21	264.393	800.326	0.166579	0.105863	1.00455	0.000622782	apoptosis enhancing nuclease	NM_022767.3
DNTTIP2	PH_hs_0004836	62	78	212	217	0.00201398	0.000984515	3.6634e-05	3.41673e-05	-50	0	0	0	1.66286e-11	2.76599e-27	69.7747	214.494	0.150798	0.0929684	1.00446	9.851e-06	deoxynucleotidyltransferase, terminal, interacting protein 2	NM_014597.4
LOC100128130	PH_hs_0045234	112	207	429	519	0.000296521	3.94615e-05	5.41596e-06	3.58442e-06	0	0	0	0	3.34719e-06	7.66253e-16	157.526	473.841	0.222065	0.125403	1.00434	0.0129198	uncharacterized LOC100128130	XR_171322.1,XR_109904.1,XR_112373.1
VRK1	PH_hs_0025158	29	87	193	295	0.0151424	0.000684586	4.91277e-05	1.4214e-05	-50	0	0	0	0.00279078	8.20501e-08	56.6973	243.816	0.360828	0.190986	1.00401	0.00282292	vaccinia related kinase 1	NM_003384.2
HECA	PH_hs_0000672	266	268	821	809	1.86209e-05	1.82931e-05	1.59617e-06	1.67114e-06	0	0	0	0	1.93688e-20	6.5138e-35	267.613	815.033	0.108796	0.0814956	1.00384	1.97593e-05	headcase homolog (Drosophila)	NM_016217.2
SRGN	PH_hs_0030874	1589	2012	4451	5835	7.38649e-07	6.12329e-07	4.08501e-07	3.76295e-07	0	0	0	0	6.02758e-21	1.85829e-13	1794.42	5140.53	0.10734	0.137637	1.00368	0.000130616	serglycin	NM_002727.2,NR_036430.1
MRPL21	PH_hs_0044373	1138	1517	3399	4243	1.05397e-06	7.70003e-07	4.54101e-07	4.15591e-07	0	0	0	0	7.49899e-17	8.76138e-16	1321.34	3819.5	0.121116	0.125664	1.0023	9.09851e-05	mitochondrial ribosomal protein L21	NM_181515.1,NM_181514.1
RNF103	PH_hs_0029219	583	662	1798	1879	3.73014e-05	2.26109e-06	6.66355e-07	6.73008e-07	0	0	0	0	6.42529e-29	3.04021e-34	622.075	1838.38	0.0901076	0.0823368	1.00166	5.46633e-08	ring finger protein 103	NM_001198951.1,NM_005667.3
CYSTM1	PH_hs_0027376	3751	6276	12399	14103	4.35528e-07	3.69249e-07	3.26249e-07	3.21234e-07	0	0	0	0	5.8872e-09	3.33783e-23	4962.97	13248.1	0.175348	0.101495	1.00127	0.00109375	cysteine-rich transmembrane module containing 1	NM_032412.3
TMEM167B	PH_hs_0031367	468	582	1527	1575	4.45905e-06	2.86057e-06	1.1223e-06	0.00017079	0	0	0	0	1.38836e-20	7.24802e-27	523.46	1550.93	0.108375	0.0937455	1.00053	9.6876e-05	transmembrane protein 167B	NM_020141.3
IP6K2	PH_hs_0032660	165	211	485	628	8.13035e-05	3.72106e-05	0.000874301	2.48294e-06	0	0	0	0	2.74121e-15	6.51569e-11	187.319	556.245	0.127954	0.155598	1.00029	0.00377222	inositol hexakisphosphate kinase 2	NM_001190317.1,NM_001190316.1,NM_001146179.2,NM_001146178.2,NM_001005911.2,NM_001005910.2,NR_027438.2,NR_027437.2
SP3	PH_hs_0061842	126	168	423	456	0.000198966	7.68702e-05	5.59719e-06	4.72011e-06	0	0	0	0	1.53459e-12	3.63573e-25	146.317	439.445	0.143379	0.0971159	0.999442	0.000146748	Sp3 transcription factor	NM_001172712.1,NM_001017371.4,NM_003111.4
BDP1	PH_hs_0048918	146	254	518	683	0.000123004	2.12842e-05	3.5982e-06	2.14328e-06	0	0	0	0	4.30055e-07	2.83843e-12	197.803	600.206	0.203202	0.14519	0.997617	0.00854981	B double prime 1, subunit of RNA polymerase III transcription initiation factor IIIB	NM_018429.2
WNT5A	PH_hs_0009158	434	601	1367	1708	5.27497e-06	2.69137e-06	8.50669e-07	6.95181e-07	0	0	0	0	7.76738e-14	2.2585e-15	514.619	1536.9	0.135456	0.127556	0.997596	0.000236863	wingless-type MMTV integration site family, member 5A	NM_001256105.1,NM_003392.4
KLHL20	PH_hs_0005916	96	151	333	396	0.000545487	0.000109259	1.00776e-05	6.53777e-06	0	0	0	0	6.01388e-08	2.88558e-16	122.435	364.389	0.188926	0.123548	0.996521	0.00416818	kelch-like 20 (Drosophila)	NM_014458.3
C11orf58	PH_hs_0031340	36	102	241	356	0.0116989	0.000403988	2.48421e-05	0.0015818	-50	0	0	0	0.00179562	6.78413e-07	67.5251	298.293	0.343407	0.206986	0.991931	0.0154378	chromosome 11 open reading frame 58	NM_014267.5
SLFN5	PH_hs_0031016	141	183	474	492	0.000136624	5.81621e-05	4.5408e-06	4.00506e-06	0	0	0	0	5.33475e-14	6.15885e-31	161.355	482.974	0.134547	0.0869118	0.991411	5.39254e-05	schlafen family member 5	NM_144975.3
SAMD4A	PH_hs_0045475	80	85	246	240	0.000901327	0.23528	2.33813e-05	2.51548e-05	0	0	0	0	0.00268097	3.40474e-26	82.5801	243.014	0.359138	0.0950351	0.989559	0.0434258	sterile alpha motif domain containing 4A	NM_001161576.2,NM_015589.5,NM_001161577.1
LETMD1	PH_hs_0024145	370	539	1317	1350	7.99327e-06	3.32068e-06	8.83336e-07	8.89832e-07	0	0	0	0	1.03368e-11	1.33714e-37	451.413	1333.46	0.149227	0.0783579	0.988401	0.000150939	LETM1 domain containing 1	NM_001243689.1,NM_015416.4,NR_045020.1,NR_045019.1,NR_045018.1,NR_045017.1
ZNF24	PH_hs_0060636	286	491	1052	1230	1.51957e-05	4.02455e-06	1.14534e-06	9.49647e-07	0	0	0	0	8.49013e-08	1.94252e-19	384.351	1140.69	0.191216	0.111854	0.987286	0.00304641	zinc finger protein 24	NM_006965.2
RBM45	PH_hs_0042003	229	399	693	788	2.89485e-05	0.492087	2.09027e-06	1.69929e-06	0	0	0	0	0.474342	3.90509e-21	310.539	740.336	15.5374	0.106813	0.987107	1.6747e-06	RNA binding motif protein 45	NM_152945.2
MALAT1	PH_hs_0037242	570	858	1953	2165	2.97582e-06	1.49742e-06	6.25701e-07	5.82033e-07	0	0	0	0	4.38448e-11	2.60782e-25	708.589	2058.64	0.15416	0.0968158	0.985909	0.000229144	metastasis associated lung adenocarcinoma transcript 1 (non-protein coding)	NR_002819.2
ERRFI1	PH_hs_0001088	110	158	364	425	0.00031306	9.38075e-05	8.03145e-06	5.54938e-06	0	0	0	0	5.47607e-10	1.29715e-17	133.135	394.394	0.164072	0.118154	0.985373	0.00129557	ERBB receptor feedback inhibitor 1	NM_018948.3
TCEANC	PH_hs_0042637	143	84	226	233	0.399453	0.00148828	3.01261e-05	2.75537e-05	0	0	0	0	0.24302	6.78775e-27	115.253	229.49	1.4355	0.093692	0.984047	0.101605	transcription elongation factor A (SII) N-terminal and central domain containing	NM_152634.2
NOLC1	PH_hs_0047574	415	705	1571	1938	0.0947028	2.03083e-06	7.46127e-07	6.29308e-07	0	0	0	0	0.00010536	3.70331e-16	554.157	1753.85	0.269847	0.124014	0.983663	0.0189302	nucleolar and coiled-body phosphoprotein 1	NM_004741.3
CASC3	PH_hs_0004765	434	620	1502	1528	5.28838e-06	8.20248e-06	7.77357e-07	0.0482831	0	0	0	0	3.66695e-12	3.57437e-10	523.669	1514.97	0.145964	0.162265	0.981448	0.0263009	cancer susceptibility candidate 3	NM_007359.4
GPBP1	PH_hs_0004134	573	920	2049	2224	4.73904e-06	1.35604e-06	6.04453e-07	5.71741e-07	0	0	0	0	2.25499e-09	3.89419e-28	739.698	2136.21	0.170523	0.0914444	0.980869	0.000751446	GC-rich promoter binding protein 1	NM_001127236.2,NM_001127235.2,NM_022913.3,NM_001203246.1
ZFAND2A	PH_hs_0006387	1869	2205	5544	5686	6.46613e-07	5.74963e-07	3.81523e-07	3.78867e-07	0	0	0	0	2.1199e-29	7.41772e-40	2033.68	5614.82	0.0893133	0.0759857	0.980607	4.89808e-09	zinc finger, AN1-type domain 2A	NM_182491.2
CKAP4	PH_hs_0004243	568	1024	1979	2605	2.99567e-06	1.17992e-06	6.19691e-07	5.19176e-07	0	0	0	0	2.20138e-07	4.08781e-13	786.602	2290.88	0.197994	0.1397	0.980411	0.0066201	cytoskeleton-associated protein 4	NM_006825.3
ITK	PH_hs_0012267	24	86	222	250	0.0536749	0.000711413	0.00498245	0.0623842	-50	0	0	0	0.00674148	3.53665e-06	53.5901	235.952	0.404735	0.222644	0.98039	0.0646124	IL2-inducible T-cell kinase	NM_005546.3
JUN	PH_hs_0004525	25279	28716	65425	63101	3.0553e-07	3.03217e-07	3.19212e-07	1.27971e-06	0	0	0	0	4.57275e-38	4.85898e-33	26978.8	64268.1	0.0778498	0.0839177	0.980027	4.08378e-07	jun proto-oncogene	NM_002228.3
BACH1	PH_hs_0049082	175	192	529	567	6.72189e-05	6.14749e-05	3.44753e-06	3.00568e-06	0	0	0	0	1.06173e-26	8.71319e-27	183.531	547.938	0.0940589	0.0938962	0.979834	8.22998e-07	BTB and CNC homology 1, basic leucine zipper transcription factor 1	NM_206866.1,NM_001186.2
SDE2	PH_hs_0048790	318	377	1001	1070	0.135225	7.4088e-06	1.22309e-06	1.11526e-06	0	0	0	0	2.15741e-05	3.78878e-29	346.891	1035.39	0.244502	0.0897266	0.979627	0.00649898	SDE2 telomere maintenance homolog (S. pombe)	NM_152608.3
TIMP1	PH_hs_0026117	8225	10818	23806	24877	3.48051e-07	3.32402e-07	3.06739e-07	3.06148e-07	0	0	0	0	1.65263e-18	4.30675e-36	9480.46	24339.9	0.114936	0.0800729	0.977997	1.87416e-06	TIMP metallopeptidase inhibitor 1	NM_003254.2
RASSF8	PH_hs_0047328	404	485	1270	1338	1.40265e-05	4.12895e-06	9.17549e-07	8.69162e-07	0	0	0	0	8.86711e-23	4.41512e-32	443.583	1303.89	0.102522	0.0852435	0.977932	1.55786e-07	Ras association (RalGDS/AF-6) domain family (N-terminal) member 8	NM_001164748.1,NM_001164747.1,NM_001164746.1
IRAK2	PH_hs_0019808	160	181	495	520	9.02272e-05	6.02887e-05	2.42603e-05	3.56995e-06	0	0	0	0	3.0192e-24	4.28965e-27	170.399	507.461	0.0990956	0.09332	0.977474	2.27037e-06	interleukin-1 receptor-associated kinase 2	NM_001570.3
RAPH1	PH_hs_0048967	473	800	1828	1809	4.35668e-06	1.65994e-06	6.57761e-07	6.63201e-07	0	0	0	0	2.59408e-08	2.39062e-38	629.924	1818.56	0.183664	0.0775474	0.97565	0.00200088	Ras association (RalGDS/AF-6) and pleckstrin homology domains 1	NM_213589.1
ETNK1	PH_hs_0044186	363	393	1076	1155	8.07644e-06	6.75157e-06	1.10805e-06	1.01881e-06	0	0	0	0	4.28692e-31	1.06265e-28	378.19	1115.37	0.0866767	0.090475	0.975075	7.94828e-07	ethanolamine kinase 1	NM_001039481.1
HIST2H4B|HIST2H4A	PH_hs_0027130	715	730	2146	2046	1.98557e-06	1.91753e-06	5.85474e-07	6.05073e-07	0	0	0	0	1.54676e-25	3.65119e-31	723.919	2096.21	0.0963494	0.0865731	0.974537	2.9147e-05	histone cluster 2, H4b|histone cluster 2, H4a	NM_001034077.4|NM_003548.2
DUSP5	PH_hs_0042225	536	744	1878	1805	3.35743e-06	1.85945e-06	6.4425e-07	6.6455e-07	0	0	0	0	5.38141e-14	2.25109e-32	636.401	1841.66	0.134568	0.0848322	0.974287	6.78896e-05	dual specificity phosphatase 5	NM_004419.3
CSNK2B	PH_hs_0022181	574	982	1907	2560	2.93567e-06	1.24297e-06	9.33347e-07	5.2437e-07	0	0	0	0	3.4092e-08	2.74116e-12	769.755	2232.33	0.185326	0.145085	0.970094	0.0052027	casein kinase 2, beta polypeptide	NM_001320.5
PLA2G4A	PH_hs_0012271	234	284	796	739	2.71796e-05	1.54743e-05	1.67322e-06	1.88117e-06	0	0	0	0	3.90846e-20	2.30229e-25	258.396	767.615	0.109701	0.0967039	0.970052	2.59776e-05	phospholipase A2, group IVA (cytosolic, calcium-dependent)	NM_024420.2
RSL1D1	PH_hs_0028332	86	88	225	255	0.000711293	0.000678332	0.396132	2.10457e-05	0	0	0	0	6.70249e-15	0.139863	87.1661	239.948	0.129838	0.925125	0.970004	4.20519e-05	ribosomal L1 domain containing 1	NM_015659.2
LOC101060301|LOC649330|HNRNPCL1|LOC440563	PH_hs_0034372	127	235	483	557	0.000194177	0.000128678	4.16767e-06	3.11307e-06	0	0	0	0	5.15615e-06	3.43549e-19	178.756	519.871	0.226731	0.112651	0.969906	0.012727	heterogeneous nuclear ribonucleoprotein C-like 1-like|heterogeneous nuclear ribonucleoprotein C-like|heterogeneous nuclear ribonucleoprotein C-like 1|heterogeneous nuclear ribonucleoprotein C-like	XM_003960114.1|NM_001146181.1|NM_001013631.1|NM_001136561.2
MBD1	PH_hs_0024657	656	1077	2506	2396	2.2982e-06	1.10862e-06	5.30934e-07	5.55728e-07	0	0	0	0	5.17358e-09	7.75598e-32	858.15	2451.23	0.174674	0.0855921	0.969714	0.00141183	methyl-CpG binding domain protein 1	NM_001204143.1,NM_001204142.1,NM_001204136.1,NM_015845.3,NM_002384.2,NM_015847.3,NM_015846.3,NM_015844.2
CREBRF	PH_hs_0047294	101	141	349	349	0.000419619	0.000136497	8.91936e-06	9.03708e-06	0	0	0	0	1.8163e-10	8.78849e-33	120.303	349.005	0.159514	0.0842677	0.969534	0.000915976	CREB3 regulatory factor	NM_153607.2
MAP3K4	PH_hs_0040021	104	163	337	444	0.000379557	8.48734e-05	9.76613e-06	5.03731e-06	0	0	0	0	3.68952e-08	8.27136e-12	132.36	390.309	0.185815	0.148507	0.969086	0.00762029	mitogen-activated protein kinase kinase kinase 4	NM_005922.2,NM_006724.2
MAST4	PH_hs_0048917	219	378	892	841	3.31595e-05	7.30791e-06	1.41551e-06	1.5404e-06	0	0	0	0	1.5493e-07	1.06888e-27	295.275	866.605	0.195414	0.0922199	0.967635	0.00450682	microtubule associated serine/threonine kinase family member 4	NM_001164664.1,NM_015183.2
ESM1	PH_hs_0024835	96	92	272	264	0.000495858	0.000574151	1.7501e-05	1.90328e-05	0	0	0	0	1.72139e-12	3.04038e-26	94.3331	268.018	0.143712	0.0949389	0.965876	0.000450492	endothelial cell-specific molecule 1	NM_007036.4,NM_001135604.1
SERPIND1	PH_hs_0060737	625	706	1782	2074	2.50434e-06	5.05677e-06	6.71085e-07	2.57861e-06	0	0	0	0	1.06335e-32	2.06654e-19	665.132	1927.49	0.0843812	0.11194	0.965266	1.5081e-05	serpin peptidase inhibitor, clade D (heparin cofactor), member 1	NM_000185.3
POP7	PH_hs_0019643	566	914	1712	2628	3.01604e-06	1.52165e-06	6.93232e-07	5.70243e-07	0	0	0	0	2.82995e-09	9.96131e-09	733.157	2168.35	0.171629	0.178168	0.962642	0.00903224	processing of precursor 7, ribonuclease P/MRP subunit (S. cerevisiae)	NM_005837.2
TVP23B|TVP23C	PH_hs_0029026	122	164	397	435	0.00022184	8.29326e-05	6.49022e-06	5.24698e-06	0	0	0	0	3.74842e-12	4.0643e-23	142.307	415.936	0.146031	0.1017	0.961715	0.000334576	trans-golgi network vesicle protein 23 homolog B (S. cerevisiae)|trans-golgi network vesicle protein 23 homolog C (S. cerevisiae)	NM_016078.4|NM_001135036.1
SDCCAG3	PH_hs_0005171	701	1177	2327	2961	2.05035e-06	9.97199e-07	5.55378e-07	4.84791e-07	0	0	0	0	1.34288e-08	1.12508e-14	929.458	2642.87	0.179831	0.130968	0.958768	0.0034955	serologically defined colon cancer antigen 3	NM_001039708.1,NM_001039707.1,NM_006643.3
SPTLC1	PH_hs_0022206	177	343	661	732	6.47565e-05	0.00607501	2.26707e-06	1.90926e-06	0	0	0	0	0.000121196	1.28632e-23	256.505	696.379	0.272467	0.100523	0.957169	0.020579	serine palmitoyltransferase, long chain base subunit 1	NM_006415.2
NRG1	PH_hs_0045630	350	445	1144	1155	8.85719e-06	4.98265e-06	1.03037e-06	1.01891e-06	0	0	0	0	4.09668e-18	7.68052e-41	396.117	1149.5	0.116322	0.0750153	0.956002	4.90885e-06	neuregulin 1	NM_013958.3,NM_001160002.1,NM_004495.3
KLHL15	PH_hs_0042258	50	91	230	277	0.0130071	0.393908	2.8571e-05	0.400493	-50	0	0	0	0.217579	0.187271	69.6524	253.417	1.2814	1.12613	0.955753	0.750502	kelch-like 15 (Drosophila)	NM_030624.2
NXF1	PH_hs_0016105	5363	6094	14408	15107	3.852e-07	3.71992e-07	3.20464e-07	3.18831e-07	0	0	0	0	1.91516e-37	2.73581e-35	5724.49	14756.4	0.0785303	0.081033	0.952208	3.55088e-08	nuclear RNA export factor 1	NM_006362.4,NM_001081491.1
TMEM57	PH_hs_0035666	122	159	408	406	0.00163991	9.17783e-05	6.08324e-06	6.15429e-06	0	0	0	0	6.26255e-12	4.76167e-33	139.926	407.009	0.147623	0.0839058	0.95117	0.000476302	transmembrane protein 57	NM_018202.4
UFM1	PH_hs_0061798	574	845	2074	1912	3.9818e-06	1.53021e-06	6.04479e-07	3.44768e-06	0	0	0	0	9.84437e-12	7.2802e-25	704.502	1993.32	0.149069	0.0977523	0.949661	0.000657954	ubiquitin-fold modifier 1	NM_016617.2
PTBP1	PH_hs_0010319	9004	10047	23759	24286	3.42333e-07	3.36157e-07	3.06775e-07	3.06375e-07	0	0	0	0	2.88948e-42	2.4988e-41	9523.13	24021.9	0.073675	0.0745483	0.948189	7.43336e-08	polypyrimidine tract binding protein 1	NM_031991.3,NM_031990.3,NM_002819.4
SRRM1	PH_hs_0042414	292	661	1054	1743	1.43262e-05	2.27225e-06	1.13868e-06	6.83251e-07	0	0	0	0	4.43943e-05	1.98446e-07	468.479	1397.26	0.255144	0.197221	0.948074	0.0506929	serine/arginine repetitive matrix 1	NM_005839.3
CGB|CGB8|CGB5|CGB7	PH_hs_0039252	234	315	709	896	2.71299e-05	1.78911e-05	2.01188e-06	1.40666e-06	0	0	0	0	9.85522e-14	2.62691e-14	273.161	802.168	0.136041	0.132882	0.947843	0.000442056	chorionic gonadotropin, beta polypeptide|chorionic gonadotropin, beta polypeptide 8|chorionic gonadotropin, beta polypeptide 5|chorionic gonadotropin, beta polypeptide 7	NM_000737.3|NM_033183.2|NM_033043.1|NM_033142.1
RASSF8	PH_hs_0061175	1354	1951	4464	4471	8.5877e-07	6.26176e-07	4.08237e-07	4.07872e-07	0	0	0	0	4.51074e-13	7.31478e-43	1641.71	4467.55	0.139965	0.0731346	0.946406	9.98831e-05	Ras association (RalGDS/AF-6) domain family (N-terminal) member 8	NM_001164748.1,NM_001164747.1,NM_001164746.1
BRF2	PH_hs_0014119	148	165	426	466	0.000116206	8.1481e-05	0.353016	4.50289e-06	0	0	0	0	3.94366e-25	0.0645155	156.464	445.933	0.0971898	0.65879	0.946334	0.0667582	BRF2, subunit of RNA polymerase III transcription initiation factor, BRF1-like	NM_018310.3
RELL1	PH_hs_0014633	89	98	267	257	0.000633881	0.000475826	2.11334e-05	2.08487e-05	0	0	0	0	2.60143e-20	6.94247e-25	93.5076	262.022	0.109174	0.0977083	0.945696	8.9254e-05	RELT-like 1	NM_001085400.1
FOXN2	PH_hs_0049360	223	347	641	1070	3.13765e-05	9.05302e-06	2.39332e-06	1.11527e-06	0	0	0	0	2.24358e-09	3.40431e-07	282.615	854.725	0.170499	0.201339	0.942215	0.0167151	forkhead box N2	NM_002158.3
CITED2	PH_hs_0004690	307	326	902	944	1.24937e-05	0.00521671	3.80301e-05	0.00308619	0	0	0	0	2.24755e-16	8.48802e-17	316.812	922.935	0.123086	0.121334	0.941703	0.0117847	Cbp/p300-interacting transactivator, with Glu/Asp-rich carboxy-terminal domain, 2	NM_001168389.2,NM_001168388.2,NM_006079.4
DDIT4	PH_hs_0006110	808	1140	2631	2771	1.63509e-06	1.03432e-06	5.16288e-07	5.01779e-07	0	0	0	0	1.1681e-13	2.25762e-33	968.137	2700.78	0.136463	0.0834714	0.94106	6.80787e-05	DNA-damage-inducible transcript 4	NM_019058.2
KRTAP21-3	PH_hs_0060071	77	122	218	237	0.00101941	0.482401	3.36881e-05	2.61467e-05	0	0	0	0	0.441245	5.04727e-21	98.6246	227.468	6.76527	0.107123	0.940921	2.49211e-05	keratin associated protein 21-3	NM_001164435.1
HIST1H2BD	PH_hs_0044115	451	521	1366	1410	4.8378e-06	4.65549e-06	8.51231e-07	8.25034e-07	0	0	0	0	2.2202e-28	3.20744e-36	485.46	1387.94	0.0910212	0.079923	0.940666	3.74811e-08	histone cluster 1, H2bd	NM_021063.3,NM_138720.2
SLC39A7	PH_hs_0027335	755	1279	2613	2974	1.81658e-06	9.10713e-07	5.18277e-07	4.83696e-07	0	0	0	0	1.85539e-08	1.24378e-22	1006.45	2792.88	0.181683	0.102885	0.939945	0.00262814	solute carrier family 39 (zinc transporter), member 7	NM_001077516.1,NM_006979.2
CCNT1	PH_hs_0005116	162	270	614	620	8.63377e-05	1.78507e-05	2.58702e-06	2.54141e-06	0	0	0	0	8.75042e-08	8.47793e-38	213.842	616.997	0.191421	0.0781409	0.938703	0.00493748	cyclin T1	NM_001240.3
H3F3C	PH_hs_0049694	3695	6564	11065	15329	4.38187e-07	3.6524e-07	3.31318e-07	3.18338e-07	0	0	0	0	7.09379e-08	1.71776e-11	5070.67	13189.4	0.190013	0.150907	0.938304	0.0096762	H3 histone, family 3C	NM_001013699.2
NCKAP1	PH_hs_0014274	429	844	1553	2018	5.41368e-06	1.53263e-06	7.54045e-07	6.11015e-07	0	0	0	0	2.81209e-06	1.44362e-13	627.729	1784.67	0.220262	0.136995	0.938091	0.0164571	NCK-associated protein 1	NM_205842.1,NM_013436.3
POM121|POM121C	PH_hs_0033723	268	355	863	927	1.82899e-05	8.55142e-06	8.94995e-06	1.34235e-06	0	0	0	0	5.08176e-15	2.62084e-26	310.103	894.895	0.129246	0.0948132	0.937323	0.000108529	POM121 transmembrane nucleoporin|POM121 transmembrane nucleoporin C	NM_172020.3|NM_001099415.1
NRBP1	PH_hs_0014083	246	384	804	1006	2.33791e-05	7.03244e-06	1.64735e-06	1.20459e-06	0	0	0	0	2.04312e-09	6.61898e-15	312.34	904.642	0.170049	0.129811	0.93721	0.00252072	nuclear receptor binding protein 1	NM_013392.2
KIAA0753	PH_hs_0002462	113	256	481	527	0.000286315	0.000257718	4.20382e-06	3.57878e-06	0	0	0	0	0.000178035	8.41092e-24	181.391	503.922	0.28006	0.100098	0.936503	0.0462697	KIAA0753	NM_014804.2
ARF6	PH_hs_0030844	102	125	310	327	0.000406425	0.000205905	1.21774e-05	1.14668e-05	0	0	0	0	3.81272e-15	3.94647e-26	113.208	318.473	0.12864	0.095161	0.935525	7.17459e-05	ADP-ribosylation factor 6	NM_001663.3
PPP2CB	PH_hs_0027708	113	229	482	477	0.000290904	3.99856e-05	4.18404e-06	4.28141e-06	0	0	0	0	2.07153e-05	4.23603e-33	168.531	479.516	0.243941	0.0838373	0.935182	0.0295821	protein phosphatase 2, catalytic subunit, beta isozyme	NM_001009552.1
ANKRD10	PH_hs_0022779	279	452	1005	1066	1.62647e-05	4.81268e-06	1.20627e-06	1.12034e-06	0	0	0	0	8.95768e-09	2.26913e-30	362.092	1035.4	0.177588	0.0877742	0.935109	0.00190791	ankyrin repeat domain 10	NM_017664.2
ITGAV	PH_hs_0049131	54	99	208	325	0.00303301	0.000445831	3.88591e-05	1.07312e-05	-50	0	0	0	1.57252e-05	1.47666e-07	75.5675	266.289	0.240229	0.195069	0.934896	0.00617329	integrin, alpha V	NM_001145000.1,NM_001144999.1,NM_002210.3
HIST1H4B	PH_hs_0031792	225	237	664	677	3.16485e-05	2.61157e-05	2.2493e-06	2.17599e-06	0	0	0	0	6.54201e-24	4.00565e-36	231.274	670.485	0.0998493	0.080036	0.934588	1.03597e-05	histone cluster 1, H4b	NM_003544.2
SFPQ	PH_hs_0027942	916	1887	3394	4122	1.36419e-06	6.42639e-07	4.54402e-07	4.19872e-07	0	0	0	0	5.65135e-06	1.91371e-17	1380.76	3756.72	0.227758	0.118792	0.933508	0.0169358	splicing factor proline/glutamine-rich	NM_005066.2
YPEL5	PH_hs_0061377	2164	2353	6231	5821	5.82212e-07	5.51961e-07	3.69919e-07	3.76502e-07	0	0	0	0	3.09473e-39	8.71852e-29	2259.39	6026.83	0.0766166	0.0903299	0.932922	8.79581e-06	yippee-like 5 (Drosophila)	NM_001127401.1,NM_001127400.1,NM_001127399.1,NM_016061.2
RPL7	PH_hs_0045013	4988	8760	16168	17954	3.93577e-07	3.44006e-07	3.1667e-07	3.13565e-07	0	0	0	0	4.45909e-08	5.18902e-26	6796.98	17058	0.187004	0.0953956	0.932288	0.00356221	ribosomal protein L7	NM_000971.3
REST	PH_hs_0060980	138	248	538	552	0.000147469	2.28933e-05	3.33466e-06	3.16746e-06	0	0	0	0	1.15689e-06	9.81196e-34	190.735	544.982	0.21169	0.0829942	0.932201	0.0120104	RE1-silencing transcription factor	NM_001193508.1,NM_005612.4
SLC12A2	PH_hs_0047424	114	173	333	500	0.00033245	6.97378e-05	1.00695e-05	3.8717e-06	0	0	0	0	7.592e-09	1.45889e-08	142.385	416.2	0.176695	0.1803	0.931068	0.0150492	solute carrier family 12 (sodium/potassium/chloride transporters), member 2	NM_001256461.1,NM_001046.2,NR_046207.1
HIST2H2BE	PH_hs_0000289	160	130	418	418	9.01888e-05	0.000179091	5.74923e-06	5.74934e-06	0	0	0	0	4.0243e-09	3.57395e-34	146.108	418.006	0.173387	0.0824266	0.929606	0.00525249	histone cluster 2, H2be	NM_003528.2
CDC42EP3	PH_hs_0017080	183	335	704	756	5.82212e-05	9.92773e-06	2.03669e-06	1.8126e-06	0	0	0	0	1.13819e-06	1.60212e-27	255.852	729.915	0.211542	0.0925363	0.928238	0.0102337	CDC42 effector protein (Rho GTPase binding) 3	NM_006449.4,NM_001270438.1,NM_001270437.1,NM_001270436.1
TMEM132A	PH_hs_0006532	124	134	380	358	0.000592565	0.0001646	0.00019546	8.36368e-06	0	0	0	0	3.38667e-20	1.81138e-20	129.071	369.045	0.109514	0.108711	0.928187	0.00135072	transmembrane protein 132A	NM_178031.2,NM_017870.3
HEATR2	PH_hs_0026779	120	231	373	721	0.0313475	2.82206e-05	7.55203e-06	1.95754e-06	0	0	0	0	6.42113e-05	1.41777e-05	173.167	546.37	0.261133	0.238875	0.926037	0.0946699	HEAT repeat containing 2	NM_017802.3
RPSA|RPSAP58|RPSAP9	PH_hs_0033588	493	777	1559	1998	4.05377e-06	1.76085e-06	7.51287e-07	6.15392e-07	0	0	0	0	9.14788e-10	3.49391e-14	629.493	1777.72	0.166327	0.133545	0.92455	0.00299934	ribosomal protein SA|ribosomal protein SA pseudogene 58|ribosomal protein SA pseudogene 9	NM_002295.4,NM_001012321.1|NR_003662.2|NR_026890.1
EPB41L4A-AS1	PH_hs_0043093	491	624	1382	1782	5.07331e-06	2.51164e-06	8.414e-07	6.71231e-07	0	0	0	0	7.50693e-19	7.49707e-14	555.567	1581.29	0.113771	0.135369	0.923991	0.000364488	EPB41L4A antisense RNA 1	NR_015370.2
RBPMS	PH_hs_0022944	80	127	265	308	0.00141661	0.000352636	1.88312e-05	1.23839e-05	0	0	0	0	3.08028e-07	5.55926e-17	102.585	286.425	0.200557	0.120595	0.92398	0.00888669	RNA binding protein with multiple splicing	NM_001008712.1
TWSG1	PH_hs_0028020	186	212	585	555	0.0681576	0.00217386	2.83134e-06	3.13472e-06	0	0	0	0	1.56273e-07	3.25363e-27	198.845	570.063	0.195476	0.093098	0.922236	0.00800351	twisted gastrulation homolog 1 (Drosophila)	NM_020648.5
ZNF175	PH_hs_0048842	139	196	414	546	0.000143234	4.94124e-05	5.87836e-06	3.23603e-06	0	0	0	0	5.2252e-11	4.96843e-12	166.494	479.765	0.154792	0.146899	0.922192	0.00343118	zinc finger protein 175	NM_007147.2
HERPUD1	PH_hs_0008735	18298	19312	45649	44312	3.13005e-07	3.11571e-07	4.23551e-07	3.58562e-07	0	0	0	0	3.28466e-34	1.92831e-35	18826.4	44983.6	0.0823797	0.0808488	0.921755	7.5319e-06	homocysteine-inducible, endoplasmic reticulum stress-inducible, ubiquitin-like domain member 1	NM_001010990.1,NM_001010989.1,NM_014685.2
YRDC	PH_hs_0023610	1497	1967	4497	4716	7.79471e-07	4.26167e-06	4.07064e-07	5.38845e-07	0	0	0	0	5.58995e-17	2.27464e-34	1724.58	4606.16	0.120605	0.0821764	0.921203	6.3659e-06	yrdC domain containing (E. coli)	NM_024640.3
RAB13	PH_hs_0060456	6596	12349	22769	23165	3.64819e-07	3.26415e-07	3.07675e-07	3.07304e-07	0	0	0	0	3.87988e-07	1.37608e-42	9352.52	22966.6	0.202375	0.0733814	0.92109	0.00703458	RAB13, member RAS oncogene family	NR_073553.1,NM_001272038.1,NM_002870.3
WDR45	PH_hs_0028801	1339	1629	3892	4085	8.68586e-07	7.22853e-07	4.29166e-07	4.53235e-07	0	0	0	0	7.70304e-25	2.3691e-34	1480.45	3988.2	0.0978045	0.0821988	0.91902	1.39653e-07	WD repeat domain 45	NM_007075.3,NM_001029896.1
TM4SF1	PH_hs_0016971	345	333	946	993	9.19722e-06	1.00679e-05	1.30595e-06	1.22893e-06	0	0	0	0	4.88211e-18	6.04794e-32	340.141	969.427	0.116595	0.0854377	0.918693	0.000132401	transmembrane 4 L six family member 1	NM_014220.2
GOSR2	PH_hs_0048126	83	121	263	299	0.000804037	0.000227991	1.92535e-05	1.34311e-05	0	0	0	0	5.48788e-09	2.11859e-18	101.305	280.938	0.174981	0.115311	0.918068	0.00346021	golgi SNAP receptor complex member 2	NM_001012511.1
SLC6A9	PH_hs_0047902	80	94	223	254	0.00168872	0.000827076	3.1446e-05	2.13052e-05	0	0	0	0	1.62148e-14	1.24356e-17	86.8668	238.446	0.131783	0.118086	0.916651	0.000205672	solute carrier family 6 (neurotransmitter transporter, glycine), member 9	NM_001261380.1,NM_001024845.2,NM_201649.3,NM_006934.3,NR_048548.1,NR_048549.1
CHERP	PH_hs_0024394	135	234	481	553	0.000157986	2.71972e-05	4.20501e-06	3.15747e-06	0	0	0	0	4.58532e-07	2.04848e-19	182.489	516.875	0.203722	0.111928	0.915786	0.0113025	calcium homeostasis endoplasmic reticulum protein	NM_006387.5
SWI5	PH_hs_0031531	178	350	696	799	0.00139011	8.86529e-06	2.07512e-06	3.3975e-06	0	0	0	0	1.139e-05	7.67036e-20	260.365	747.321	0.236086	0.110591	0.914506	0.0256375	SWI5 recombination repair homolog (yeast)	NM_001040011.1
FRMD8	PH_hs_0017379	124	229	412	505	0.000210034	2.89449e-05	0.275893	3.79304e-06	0	0	0	0	2.70759e-06	0.010436	174.319	458.336	0.219876	0.432846	0.914472	0.0161621	FERM domain containing 8	NM_031904.3
MTHFD2	PH_hs_0009312	3766	4907	11035	10829	4.41199e-06	5.1381e-06	4.53954e-07	3.32355e-07	0	0	0	0	8.50862e-17	8.11365e-38	4318.81	10932.5	0.121338	0.0781201	0.913055	1.44922e-05	methylenetetrahydrofolate dehydrogenase (NADP+ dependent) 2, methenyltetrahydrofolate cyclohydrolase	NM_006636.3,NR_027405.1
RPS18	PH_hs_0029574	1211	1781	3593	4404	9.66147e-07	6.71437e-07	4.4333e-07	4.10026e-07	0	0	0	0	2.98517e-12	7.14257e-17	1485.5	3997.07	0.145341	0.121031	0.91108	0.00084576	ribosomal protein S18	NM_022551.2
OR10G2	PH_hs_0042538	362	604	1128	1535	8.1381e-06	2.67757e-06	5.16088e-05	7.62264e-07	0	0	0	0	2.06244e-08	6.67976e-11	478.163	1330.77	0.182301	0.15569	0.910241	0.0151235	olfactory receptor, family 10, subfamily G, member 2	NM_001005466.1
SMOX	PH_hs_0020114	193	191	530	567	4.92505e-05	5.07739e-05	3.45231e-06	3.02784e-06	0	0	0	0	1.58359e-17	4.97343e-27	192.526	548.44	0.11848	0.0934394	0.909825	0.000120054	spermine oxidase	NM_001270691.1,NM_175842.2,NM_175841.2,NM_175840.2,NM_175839.2
BBX	PH_hs_0002869	261	413	879	1005	1.96874e-05	5.9124e-06	1.44516e-06	1.20635e-06	0	0	0	0	3.47407e-09	4.57008e-21	334.045	941.782	0.172647	0.107003	0.908521	0.00227445	bobby sox homolog (Drosophila)	NM_001142568.1,NM_020235.5
MAD2L1BP	PH_hs_0044676	1517	2580	5050	5578	7.70055e-07	6.84042e-07	3.92089e-07	3.8088e-07	0	0	0	0	1.69764e-08	2.09019e-26	2027.07	5313.1	0.181168	0.0946227	0.908388	0.00317507	MAD2L1 binding protein	NM_014628.2,NM_001003690.1
DAB2	PH_hs_0027712	82	113	270	262	0.00158119	0.000287554	1.78768e-05	1.94818e-05	0	0	0	0	7.42453e-10	3.68101e-26	96.9688	266.018	0.165399	0.0951015	0.908349	0.00240933	disabled homolog 2, mitogen-responsive phosphoprotein (Drosophila)	NM_001244871.1,NM_001343.3
SPAG9	PH_hs_0026535	84	137	285	322	0.000767816	0.000167864	1.53235e-05	1.10016e-05	0	0	0	0	3.22898e-07	3.74075e-19	109.452	303.436	0.200925	0.112772	0.907139	0.0113714	sperm associated antigen 9	NM_001130527.2,NM_001251971.1,NM_001130528.2,NM_003971.5
PLEKHA1	PH_hs_0049308	139	212	486	494	0.000143192	3.66258e-05	4.11069e-06	5.81651e-05	0	0	0	0	3.88396e-09	3.39407e-30	174.115	489.992	0.173208	0.0880457	0.906367	0.00713068	pleckstrin homology domain containing, family A (phosphoinositide binding specific) member 1	NM_001195608.1,NM_021622.4,NM_001001974.2
NCOA3	PH_hs_0024353	119	113	283	365	0.000240749	0.000287402	1.56303e-05	7.96842e-06	0	0	0	0	4.45471e-13	2.81257e-12	116.438	323.854	0.139931	0.145162	0.906251	0.00235807	nuclear receptor coactivator 3	NM_001174088.1,NM_001174087.1,NM_181659.2,NM_006534.3
ZNF622	PH_hs_0003855	710	804	1952	2227	2.01805e-06	1.64837e-06	6.25942e-07	5.71232e-07	0	0	0	0	4.34447e-34	3.45589e-22	756.535	2089.02	0.0825354	0.104004	0.905943	4.78768e-06	zinc finger protein 622	NM_033414.2
FRMD6	PH_hs_0025734	277	364	878	942	1.68325e-05	8.02222e-06	1.44781e-06	0.335604	0	0	0	0	1.65343e-15	0.0549262	319.126	909.895	0.126924	0.625447	0.905918	3.38454e-05	FERM domain containing 6	NM_001267047.1,NM_001267046.1,NM_001042481.2,NM_152330.3
FEM1B	PH_hs_0035836	87	130	273	317	0.000938429	0.00127814	1.73011e-05	1.14804e-05	0	0	0	0	9.8305e-08	3.9125e-17	107.697	294.923	0.192215	0.119992	0.904579	0.00514893	fem-1 homolog b (C. elegans)	NM_015322.3
RASSF1	PH_hs_0002383	2970	3662	8282	8595	4.84026e-07	4.43192e-07	3.47616e-07	3.45196e-07	0	0	0	0	4.9905e-24	2.61579e-37	3306.97	8438.04	0.0995835	0.0786808	0.902562	5.04078e-07	Ras association (RalGDS/AF-6) domain family member 1	NM_007182.4,NM_170712.2,NM_170714.1,NM_001206957.1,NM_170713.2
RORA	PH_hs_0024472	203	207	542	596	0.0466514	3.94446e-05	3.28383e-06	2.73378e-06	0	0	0	0	4.07891e-08	8.01411e-24	205.409	568.909	0.186442	0.10005	0.902362	0.00684698	RAR-related orphan receptor A	NM_134262.2,NM_002943.3,NM_134260.2,NM_134261.2
GDI2	PH_hs_0028919	1582	2497	4366	6585	7.41587e-07	5.32039e-07	4.11251e-07	3.64964e-07	0	0	0	0	3.49874e-10	3.33446e-09	2021.74	5471.51	0.162176	0.172442	0.902114	0.0106389	GDP dissociation inhibitor 2	NM_001115156.1,NM_001494.3
NUP35	PH_hs_0032023	194	308	613	802	4.84416e-05	1.24434e-05	2.59475e-06	1.65938e-06	0	0	0	0	8.3467e-09	1.03057e-12	248.78	707.163	0.177205	0.142242	0.900938	0.00670592	nucleoporin 35kDa	NM_138285.3
KIAA0247	PH_hs_0004723	99	122	269	339	0.000447639	0.000221462	1.804e-05	9.65219e-06	0	0	0	0	1.00354e-14	4.81106e-13	110.201	303.876	0.130716	0.140138	0.900623	0.00103307	KIAA0247	NM_014734.3
SLC35A2	PH_hs_0044144	417	578	1400	1347	5.82037e-06	2.89658e-06	8.30748e-07	8.6325e-07	0	0	0	0	9.72239e-14	5.28316e-32	494.719	1373.62	0.136007	0.0853541	0.900289	0.000250604	solute carrier family 35 (UDP-galactose transporter), member A2	NM_001042498.2,NM_001032289.1
ZNF367	PH_hs_0049458	166	262	553	634	7.99262e-05	0.000129276	4.73857e-06	2.44079e-06	0	0	0	0	3.49964e-08	9.71502e-20	212.137	593.359	0.185488	0.110909	0.899219	0.00425037	zinc finger protein 367	NM_153695.3
HGF	PH_hs_0045633	541	703	1636	1894	0.120645	2.04184e-06	7.20203e-07	6.40126e-07	0	0	0	0	2.26086e-05	1.07659e-20	619.503	1764.55	0.245154	0.108056	0.899144	0.0167199	hepatocyte growth factor (hepapoietin A; scatter factor)	NM_001010933.1,NM_001010931.1
ZNF839	PH_hs_0060970	129	218	402	576	0.000183803	3.45179e-05	6.30085e-06	2.91724e-06	0	0	0	0	2.44222e-07	1.15194e-09	171.711	488.688	0.198776	0.16737	0.89863	0.0218126	zinc finger protein 839	NM_018335.4,NM_001267828.1,NM_001267827.1
RPS6	PH_hs_0030081	5135	10267	16905	20217	3.90111e-07	3.35023e-07	3.15265e-07	3.10417e-07	0	0	0	0	2.30384e-06	8.7621e-19	7592.11	18555.2	0.21825	0.113997	0.898389	0.0164603	ribosomal protein S6	NM_001010.2
CCDC6	PH_hs_0049268	334	702	1243	1564	1.00016e-05	2.91297e-06	2.75883e-05	8.46962e-07	0	0	0	0	1.35567e-05	7.58249e-14	510.107	1402.93	0.238297	0.135397	0.897592	0.0399887	coiled-coil domain containing 6	NM_005436.4
DBC1	PH_hs_0000615	63	79	201	201	0.00193078	0.000938909	4.33238e-05	4.45083e-05	-50	0	0	0	1.10633e-11	7.83889e-28	70.7772	201.003	0.149449	0.0919796	0.897499	0.000123607	deleted in bladder cancer 1	NM_014618.2
MAP4K5	PH_hs_0048592	109	137	309	370	0.000323552	0.000150266	1.22902e-05	7.71423e-06	0	0	0	0	2.55122e-14	1.06187e-15	122.607	339.393	0.132815	0.126041	0.895781	0.000624968	mitogen-activated protein kinase kinase kinase kinase 5	NM_198794.2,NM_006575.4
STK4	PH_hs_0002864	89	114	273	276	0.000634361	0.00027965	1.73215e-05	1.67697e-05	0	0	0	0	1.26247e-12	2.0719e-31	101.128	274.498	0.142818	0.0862104	0.89463	0.000544527	serine/threonine kinase 4	NM_006282.2
FBXO28	PH_hs_0004000	86	106	253	264	0.000711004	0.000355105	2.15315e-05	1.90321e-05	0	0	0	0	6.00292e-14	3.06262e-26	95.7394	258.483	0.134831	0.0949451	0.893353	0.000213095	F-box protein 28	NM_001136115.2,NM_015176.3,NR_049764.1
BBS7	PH_hs_0003793	3	82	201	216	0.413705	0.000842861	4.32643e-05	3.46021e-05	-50	0	0	0	0.0585728	1.43272e-21	40.635	208.475	0.638216	0.105624	0.892582	2.95405e-05	Bardet-Biedl syndrome 7	NM_176824.2
SUV420H1	PH_hs_0045058	1327	1508	3730	3794	8.76682e-07	7.74211e-07	4.36502e-07	4.33526e-07	0	0	0	0	1.89754e-35	1.35253e-41	1416.5	3761.93	0.0808403	0.0742966	0.891775	2.96673e-07	suppressor of variegation 4-20 homolog 1 (Drosophila)	NM_016028.4
TAF13	PH_hs_0044640	260	319	804	816	2.09106e-05	1.12724e-05	1.64777e-06	1.61087e-06	0	0	0	0	1.06924e-19	4.49586e-38	288.747	809.989	0.111038	0.0778418	0.891272	8.86073e-06	TAF13 RNA polymerase II, TATA box binding protein (TBP)-associated factor, 18kDa	NM_005645.3
MARS	PH_hs_0043086	490	647	1532	1593	0.000467565	2.35384e-06	7.8122e-07	1.12606e-06	0	0	0	0	7.67898e-14	2.13235e-34	565.995	1562.41	0.135428	0.0821408	0.890799	0.000187717	methionyl-tRNA synthetase	NM_004990.3
HS3ST2	PH_hs_0006337	143	138	382	1	0.000130448	0.000148281	7.15584e-06	0.494044	0	0	0	-50	1.23887e-14	0.0594982	140.973	192.201	0.131181	0.641437	0.890533	0.000517501	heparan sulfate (glucosamine) 3-O-sulfotransferase 2	NM_006043.1
ANXA8|ANXA8L2|ANXA8L1	PH_hs_0062099	104	159	349	403	0.000378157	9.18025e-05	8.92158e-06	0.107214	0	0	0	0	1.38677e-08	4.66521e-05	130.455	375.906	0.180013	0.255926	0.890149	0.0968701	annexin A8|annexin A8-like 2|annexin A8-like 1	NM_001271703.1,NM_001271702.1,NM_001040084.2|NM_001630.2|NM_001098845.1
MYH3	PH_hs_0028462	99	126	299	312	0.000445599	0.000198739	1.34239e-05	1.19631e-05	0	0	0	0	2.39301e-13	2.11974e-27	112.106	305.48	0.138289	0.0927571	0.889922	0.000416958	myosin, heavy chain 3, skeletal muscle, embryonic	NM_002470.3
AKAP12	PH_hs_0048496	466	759	1580	1734	4.49991e-06	1.80129e-06	7.42359e-07	6.99913e-07	0	0	0	0	5.13243e-09	2.67172e-26	606.712	1656.74	0.174633	0.0948295	0.889399	0.00289777	A kinase (PRKA) anchor protein 12	NM_005100.3,NM_144497.2
CCNL2	PH_hs_0060098	165	324	659	739	0.0175141	1.08495e-05	2.27911e-06	1.91468e-06	0	0	0	0	4.08458e-05	2.59252e-22	241.141	698.863	0.253847	0.103686	0.888998	0.0363593	cyclin L2	NM_001039577.3
LOC100506562|LLPH	PH_hs_0062517	87	126	167	280	0.000684832	0.0902594	0.319372	1.6105e-05	0	0	0	0	0.000277281	0.0299345	105.792	223.296	0.28961	0.531418	0.888663	0.0456123	protein LLP homolog|LLP homolog, long-term synaptic facilitation (Aplysia)	XM_003960811.1,XM_003118818.3,XM_003119852.2|NM_032338.3
SPINK1	PH_hs_0024711	105	116	286	314	0.000368046	0.000268141	1.51771e-05	1.17728e-05	0	0	0	0	2.07972e-22	1.56434e-21	110.5	299.953	0.103443	0.105727	0.88847	2.92743e-05	serine peptidase inhibitor, Kazal type 1	NM_003122.3
MAGI2-AS3	PH_hs_0004069	164	218	535	536	0.00263084	3.36229e-05	3.37025e-06	3.35933e-06	0	0	0	0	2.7053e-11	3.05111e-36	190.127	535.505	0.152458	0.0798976	0.888108	0.00109489	MAGI2 antisense RNA 3	NR_038343.2
NAA15	PH_hs_0034461	122	196	417	457	0.000221769	4.68892e-05	2.4393e-05	4.69742e-06	0	0	0	0	5.23185e-08	4.60896e-22	157.549	436.933	0.188024	0.104326	0.887537	0.0115958	N(alpha)-acetyltransferase 15, NatA auxiliary subunit	NM_057175.3
PPP4R2	PH_hs_0060019	341	612	1219	1356	0.000643761	2.60272e-06	0.0260703	8.57599e-07	0	0	0	0	8.64096e-07	1.53816e-10	470.923	1287.27	0.20908	0.158859	0.887177	0.0673008	protein phosphatase 4, regulatory subunit 2	NM_174907.2
MDM2	PH_hs_0023082	87	97	256	253	0.000793635	0.00086797	0.200137	2.15452e-05	0	0	0	0	1.43037e-18	0.000648547	91.9789	254.509	0.11472	0.310885	0.886892	0.0981358	Mdm2, p53 E3 ubiquitin protein ligase homolog (mouse)	NM_002392.4
FBXO33	PH_hs_0016136	50	112	226	361	0.00654083	0.000295426	3.0125e-05	8.19086e-06	-50	0	0	0	0.000254903	2.58202e-07	79.6546	293.257	0.287724	0.199199	0.885672	0.0105963	F-box protein 33	NM_203301.3
CCT7	PH_hs_0032888	695	1384	2064	3754	2.0801e-06	8.40261e-07	6.01388e-07	4.35372e-07	0	0	0	0	2.94212e-06	2.37941e-06	1024.9	2905.94	0.220726	0.218572	0.885591	0.0550466	chaperonin containing TCP1, subunit 7 (eta)	NM_001166285.1,NM_001166284.1,NM_001009570.2,NM_006429.3,NR_029402.1,NR_029403.1
NFYA	PH_hs_0048467	355	390	1000	1066	8.55303e-06	6.77349e-06	1.21409e-06	1.12038e-06	0	0	0	0	1.26948e-33	1.42659e-29	372.552	1032.89	0.0831409	0.0890346	0.884637	2.87917e-06	nuclear transcription factor Y, alpha	NM_021705.3,NM_002505.4
IPO5	PH_hs_0043087	198	320	637	800	5.5173e-05	1.11932e-05	2.42134e-06	1.65998e-06	0	0	0	0	1.80516e-08	1.71758e-14	256.6	718.211	0.181524	0.131913	0.884436	0.00721521	importin 5	NM_002271.4
SIK1	PH_hs_0033027	963	1240	2988	2884	1.27513e-06	9.41344e-07	4.82556e-07	4.91341e-07	0	0	0	0	4.53864e-19	8.35752e-34	1097.33	2936.23	0.113046	0.0829033	0.884113	2.47054e-05	salt-inducible kinase 1	NM_173354.3
NUMB	PH_hs_0033520	1636	2234	4969	4997	7.20251e-07	5.70057e-07	3.94043e-07	3.93662e-07	0	0	0	0	1.11098e-15	3.92364e-44	1924.89	4983.02	0.126131	0.0720209	0.881856	6.27275e-05	numb homolog (Drosophila)	NM_001005745.1,NM_001005744.1,NM_001005743.1,NM_003744.5
MRPL47	PH_hs_0014673	1531	2208	4576	5060	7.63591e-07	5.74771e-07	4.04682e-07	3.9405e-07	0	0	0	0	4.38596e-13	3.23556e-26	1857.25	4817.18	0.139889	0.0949918	0.88111	0.00030795	mitochondrial ribosomal protein L47	NM_020409.2,NM_177988.1
UBR4	PH_hs_0014887	3896	4977	10350	11562	4.29381e-07	3.93843e-07	3.34622e-07	3.29285e-07	0	0	0	0	1.15185e-20	3.32542e-25	4420.55	10953.9	0.10814	0.0970351	0.880377	1.88036e-05	ubiquitin protein ligase E3 component n-recognin 4	NM_020765.2
SEP15	PH_hs_0040311	2055	2768	6044	6215	6.03276e-07	5.02318e-07	3.72795e-07	3.70218e-07	0	0	0	0	1.42762e-16	2.81177e-39	2399.7	6129.27	0.12226	0.0765737	0.879016	4.08823e-05	15 kDa selenoprotein	NM_004261.3,NM_203341.1
KLHL21	PH_hs_0000800	10152	10344	25313	24019	3.39908e-07	8.68383e-07	3.50662e-07	1.63328e-06	0	0	0	0	2.03636e-27	6.59457e-30	10268.6	24668.7	0.0927253	0.0884991	0.878508	0.000133544	kelch-like 21 (Drosophila)	NM_014851.2
C11orf91	PH_hs_0046476	192	219	603	543	4.99418e-05	3.71867e-05	2.67485e-06	3.27196e-06	0	0	0	0	9.86673e-25	2.23917e-21	205.337	573.118	0.0980348	0.106149	0.878222	0.000213442	chromosome 11 open reading frame 91	NM_001166692.1
SMIM13	PH_hs_0001825	145	171	410	468	0.000165987	7.27465e-05	6.9236e-06	4.45882e-06	0	0	0	0	2.20446e-19	1.7718e-19	157.744	438.9	0.11203	0.111727	0.877921	9.81742e-05	small integral membrane protein 13	NM_001135575.1
PPP2CB	PH_hs_0047235	471	717	1726	1545	0.00467559	1.97603e-06	7.03669e-07	7.57447e-07	0	0	0	0	1.92194e-08	1.39888e-22	589.339	1635.85	0.181888	0.103012	0.8779	0.00761237	protein phosphatase 2, catalytic subunit, beta isozyme	NM_001009552.1
USP12	PH_hs_0061252	395	539	1168	1385	6.57398e-06	3.32014e-06	1.0059e-06	8.39603e-07	0	0	0	0	2.31579e-14	1.71619e-18	464.568	1276.12	0.132593	0.114993	0.877453	0.000457066	ubiquitin specific peptidase 12	NM_182488.3
RAB22A	PH_hs_0023434	59	102	226	292	0.0023394	0.000406211	3.01193e-05	1.43531e-05	-50	0	0	0	4.15357e-06	8.13682e-12	79.6273	258.883	0.224361	0.148455	0.877251	0.00114178	RAB22A, member RAS oncogene family	NM_020673.2
NKIRAS2	PH_hs_0048201	215	388	816	820	3.50802e-05	6.85824e-06	1.61096e-06	1.60093e-06	0	0	0	0	6.12567e-07	2.56427e-39	297.933	818.004	0.206121	0.0765326	0.876705	0.0121517	NFKB inhibitor interacting Ras-like 2	NM_017595.5,NM_001144927.1,NM_001144929.1,NM_001144928.1,NM_001001349.2
UPF3A	PH_hs_0043871	565	708	1750	1690	3.02686e-06	2.0167e-06	6.80965e-07	7.00716e-07	0	0	0	0	2.18132e-20	3.99246e-33	634.513	1720.13	0.108948	0.0838027	0.875345	2.64384e-05	UPF3 regulator of nonsense transcripts homolog A (yeast)	NM_080687.2,NM_023011.3
MLXIP	PH_hs_0048398	77	117	240	277	0.00121777	0.000255439	2.51755e-05	1.75753e-05	0	0	0	0	4.8062e-08	4.89954e-17	96.2431	258.436	0.18748	0.120378	0.87461	0.00895036	MLX interacting protein	NM_014938.4
KIAA2013	PH_hs_0061567	334	640	1164	1468	9.99139e-06	2.39998e-06	1.00985e-06	9.19318e-07	0	0	0	0	1.80009e-06	9.6681e-15	480.577	1315.46	0.215833	0.130634	0.874144	0.0213306	KIAA2013	NM_138346.2
RBM39	PH_hs_0049625	135	188	420	467	0.000160115	5.33852e-05	5.68761e-06	4.48273e-06	0	0	0	0	2.56307e-11	7.01609e-22	160.579	443.42	0.152271	0.104802	0.873694	0.00154243	RNA binding motif protein 39	NR_040724.1,NR_040722.1,NR_040723.1,NM_001242600.1,NM_001242599.1,NM_004902.3,NM_184234.2
CHMP5	PH_hs_0040375	1601	2342	4594	5537	7.34024e-07	5.5314e-07	4.04138e-07	3.8166e-07	0	0	0	0	1.50462e-12	4.83272e-18	1957.91	5063.84	0.143322	0.116579	0.87357	0.00101295	charged multivesicular body protein 5	NM_016410.5,NM_001195536.1
FAM96B	PH_hs_0001016	515	885	1812	1962	3.64168e-06	1.43312e-06	6.62302e-07	0.182648	0	0	0	0	4.45381e-08	0.000593658	692.509	1886.75	0.186996	0.30846	0.872467	0.00400887	family with sequence similarity 96, member B	NM_016062.3,NR_046109.1,NR_024525.2
KYNU	PH_hs_0025967	1606	1972	4754	4481	7.31863e-07	6.21241e-07	3.9963e-07	4.07624e-07	0	0	0	0	5.28335e-24	5.0165e-30	1784.31	4618.06	0.0996393	0.0883116	0.871661	1.88468e-05	kynureninase	NM_001199241.1,NM_003937.2
GLA	PH_hs_0004093	2466	2882	7114	6452	5.36037e-07	4.91529e-07	3.58581e-07	3.66754e-07	0	0	0	0	2.97886e-31	6.75256e-25	2670.26	6784.3	0.0864423	0.0976827	0.871647	3.03635e-05	galactosidase, alpha	NM_000169.2
PRKAR1A	PH_hs_0028092	217	390	663	1034	3.4146e-05	6.77894e-06	2.25593e-06	1.16425e-06	0	0	0	0	5.38805e-07	3.13836e-08	299.938	847.831	0.205048	0.184818	0.871496	0.0317943	protein kinase, cAMP-dependent, regulatory, type I, alpha	NM_212472.1,NM_212471.1,NM_002734.3
TPP1	PH_hs_0025203	1057	1622	3153	3825	1.13207e-06	7.25605e-07	4.70075e-07	4.3216e-07	0	0	0	0	7.7858e-11	1.70191e-17	1328.73	3487.82	0.156258	0.118599	0.869945	0.00215639	tripeptidyl peptidase I	NM_000391.3
GSK3A	PH_hs_0020452	568	879	1735	2135	2.99554e-06	1.44585e-06	1.28106e-06	5.96979e-07	0	0	0	0	2.60998e-10	3.66115e-16	717.539	1934.29	0.16097	0.123992	0.869804	0.00281965	glycogen synthase kinase 3 alpha	NM_019884.2
ADAP2	PH_hs_0061679	67	103	242	275	0.00157905	0.000390557	2.45401e-05	1.697e-05	-50	0	0	0	1.22445e-07	4.1154e-18	84.3131	258.443	0.19374	0.116329	0.86973	9.89372e-05	ArfGAP with dual PH domains 2	NM_018404.2
STAM	PH_hs_0025841	196	299	621	737	4.78001e-05	1.34254e-05	2.53406e-06	1.88827e-06	0	0	0	0	1.1992e-09	1.21729e-17	245.545	678.797	0.167554	0.118051	0.869707	0.00367548	signal transducing adaptor molecule (SH3 domain and ITAM motif) 1	NM_003473.3,NR_037774.1
AKAP10	PH_hs_0018006	201	245	637	594	4.3289e-05	2.374e-05	2.42231e-06	2.7747e-06	0	0	0	0	4.47362e-19	2.92231e-25	222.456	615.587	0.113026	0.0969183	0.868586	0.000166358	A kinase (PRKA) anchor protein 10	NM_007202.3
RIOK3	PH_hs_0012146	327	433	1008	1060	1.05596e-05	8.74785e-06	1.20153e-06	1.12815e-06	0	0	0	0	3.03499e-15	8.08601e-32	378.299	1033.92	0.128164	0.0856181	0.868515	7.65015e-05	RIO kinase 3	NM_003831.3
NOL7	PH_hs_0005920	137	282	554	570	0.000150952	1.58149e-05	3.14687e-06	2.97827e-06	0	0	0	0	1.88659e-05	2.25509e-33	206.403	561.978	0.242663	0.0834708	0.868467	0.0389549	nucleolar protein 7, 27kDa	NM_016167.3
NAE1	PH_hs_0025090	97	149	329	393	0.012877	0.000113662	1.06015e-05	0.373583	0	0	0	0	4.8823e-07	0.129418	122.008	360.888	0.204235	0.885623	0.867473	0.0158047	NEDD8 activating enzyme E1 subunit 1	NM_001018160.1,NM_001018159.1,NM_003905.3
RGMA	PH_hs_0046115	51	75	181	189	0.0042302	0.0014437	6.02779e-05	5.25591e-05	-50	0	0	0	1.8744e-07	1.30226e-23	62.5578	184.988	0.1968	0.100535	0.865902	0.000126271	RGM domain family, member A	NM_020211.2,NM_001166289.1,NM_001166288.1,NM_001166283.1,NM_001166287.1,NM_001166286.1
AGPAT9	PH_hs_0005514	1437	1605	3788	4127	8.10049e-07	7.32289e-07	4.33801e-07	4.20488e-07	0	0	0	0	1.54023e-39	3.97519e-28	1520.59	3956.93	0.0763064	0.09146	0.8658	3.19721e-06	1-acylglycerol-3-phosphate O-acyltransferase 9	NM_001256422.1,NM_001256421.1,NM_032717.4
SLC1A5	PH_hs_0010825	2111	2376	5695	5711	5.92157e-07	5.48507e-07	3.7874e-07	4.19939e-07	0	0	0	0	1.47588e-38	2.77457e-43	2242.46	5703.05	0.0773247	0.0727598	0.865476	9.1749e-07	solute carrier family 1 (neutral amino acid transporter), member 5	NM_001145145.1,NM_001145144.1,NM_005628.2
RRP12	PH_hs_0025320	1348	1639	3835	3904	8.62624e-07	7.19477e-07	4.31657e-07	4.28639e-07	0	0	0	0	6.45991e-25	2.06341e-41	1489.95	3869.43	0.0976418	0.0744695	0.86516	7.73773e-07	ribosomal RNA processing 12 homolog (S. cerevisiae)	NM_015179.3,NM_001145114.1
STYX	PH_hs_0045844	169	319	636	678	7.52073e-05	1.12718e-05	2.42689e-06	2.16954e-06	0	0	0	0	2.67399e-06	3.30491e-28	240.864	656.932	0.219749	0.0913202	0.864779	0.0210645	serine/threonine/tyrosine interacting protein	NM_001130701.1,NM_145251.3
TXNIP|LOC101060503	PH_hs_0010634	4801	5575	12915	12331	3.98348e-07	3.80929e-07	3.2458e-07	3.26478e-07	0	0	0	0	6.02377e-33	1.26072e-32	5181.57	12624.2	0.0840441	0.0844829	0.86474	3.32254e-06	thioredoxin interacting protein|thioredoxin-interacting protein-like	NM_006472.3|XM_003960170.1,XM_003960169.1
ELL	PH_hs_0029774	358	473	1092	1157	8.36407e-06	1.23166e-05	1.08813e-06	1.01687e-06	0	0	0	0	2.91313e-15	9.23733e-31	413.663	1124.4	0.128079	0.0871772	0.864252	7.17956e-05	elongation factor RNA polymerase II	NM_006532.3
AKAP17A	PH_hs_0031058	48	76	185	190	0.0042507	0.0012536	5.6333e-05	5.19056e-05	-50	0	0	0	1.46805e-06	1.24272e-25	61.4555	187.493	0.213893	0.096156	0.864002	0.000166865	A kinase (PRKA) anchor protein 17A	NM_005088.2,NR_027383.1
IRGQ	PH_hs_0037042	329	355	918	958	1.03951e-05	8.54282e-06	1.3601e-06	1.28392e-06	0	0	0	0	7.07953e-30	6.7714e-33	342.2	937.939	0.0885479	0.0841132	0.863468	1.0683e-05	immunity-related GTPase family, Q	NM_001007561.2
FAM168B	PH_hs_0015330	535	812	1456	2256	3.37204e-06	1.62332e-06	8.00254e-07	5.66688e-07	0	0	0	0	8.43065e-11	1.53375e-08	668.263	1854.56	0.156556	0.180586	0.862052	0.0147448	family with sequence similarity 168, member B	NM_001009993.2
PIP4K2C	PH_hs_0029213	51	84	195	223	0.00359724	0.0022492	4.77159e-05	3.14369e-05	-50	0	0	0	5.60801e-06	7.82518e-17	66.8445	208.952	0.227671	0.121191	0.862007	0.000370041	phosphatidylinositol-5-phosphate 4-kinase, type II, gamma	NM_001146260.1,NM_001146259.1,NM_001146258.1,NM_024779.4
PPCS	PH_hs_0043749	85	160	240	261	0.00115085	0.314678	2.51678e-05	0.291393	0	0	0	0	0.101586	0.0217563	120.933	250.465	0.785813	0.495355	0.86187	0.128671	phosphopantothenoylcysteine synthetase	NM_001077447.1,NM_024664.2
CCND1	PH_hs_0024184	20314	20690	44637	49217	3.10307e-07	3.09858e-07	2.97226e-07	2.9622e-07	0	0	0	0	3.17326e-28	5.02386e-27	20543.5	46919.2	0.0912895	0.0934475	0.860749	5.55305e-05	cyclin D1	NM_053056.2
C3orf17	PH_hs_0035870	250	356	754	843	2.22967e-05	0.0142238	1.82023e-06	1.53538e-06	0	0	0	0	3.85715e-07	6.36354e-23	301.108	798.348	0.202328	0.10217	0.859578	0.00730034	chromosome 3 open reading frame 17	NM_015412.3,NR_027796.1,NR_027794.1
PPRC1	PH_hs_0008788	127	152	366	392	0.000195252	0.000106405	7.91271e-06	6.69155e-06	0	0	0	0	8.78392e-18	2.8346e-25	139.223	378.957	0.117525	0.0968908	0.859516	7.01189e-05	peroxisome proliferator-activated receptor gamma, coactivator-related 1	NM_015062.3
C14orf142	PH_hs_0001753	356	702	982	1385	8.48384e-06	0.0660735	1.24273e-06	8.39689e-07	0	0	0	0	0.00259729	1.44942e-10	521.683	1182.78	0.357818	0.158627	0.858906	0.0823445	chromosome 14 open reading frame 142	NM_032490.4
C6orf48	PH_hs_0035526	4502	6058	12593	12803	4.07105e-07	3.72557e-07	1.15381e-06	3.24931e-07	0	0	0	0	7.16201e-17	1.35478e-40	5254.3	12697.8	0.121036	0.0752546	0.858562	9.28278e-05	chromosome 6 open reading frame 48	NM_001040438.1,NM_001040437.1
PI3	PH_hs_0006156	47	76	184	190	0.422384	0.00116564	0.000370928	5.16111e-05	-50	0	0	0	0.189184	4.09684e-22	60.9293	186.992	1.13519	0.104194	0.858335	0.000887871	peptidase inhibitor 3, skin-derived	NM_002638.3
UBE2K	PH_hs_0048503	326	610	891	1031	1.06568e-05	0.448786	1.41775e-06	1.16768e-06	0	0	0	0	0.348679	4.63437e-20	462.078	960.756	2.57142	0.109924	0.857192	3.86124e-05	ubiquitin-conjugating enzyme E2K	NM_001111113.1,NM_001111112.1,NM_005339.4
MTF1	PH_hs_0039020	95	138	309	310	0.00051122	0.000147409	1.22942e-05	1.21714e-05	0	0	0	0	2.19601e-09	2.17804e-32	115.717	309.502	0.170395	0.0848122	0.855886	0.00557214	metal-regulatory transcription factor 1	NM_005955.2
SMAD4	PH_hs_0004380	445	740	1450	1693	4.98423e-06	1.90564e-06	8.03124e-07	6.99779e-07	0	0	0	0	1.38443e-08	7.0991e-20	586.613	1571.08	0.180003	0.110488	0.855757	0.00624306	SMAD family member 4	NM_005359.5
FAM35DP|FAM35BP|FAM35A	PH_hs_0030454	257	430	1031	831	2.06906e-05	5.3859e-06	1.16789e-06	1.56783e-06	0	0	0	0	3.9153e-08	1.2677e-14	340.038	931.379	0.186185	0.131232	0.855508	0.0140059	family with sequence similarity 35, member A pseudogene|family with sequence similarity 35, member A pseudogene|family with sequence similarity 35, member A	NR_027634.1|NR_027632.1|NM_019054.2
CBWD1|CBWD3|CBWD2|CBWD5|CBWD7|CBWD6	PH_hs_0039807	25	91	222	229	0.0897139	0.000619653	3.18236e-05	2.90773e-05	-50	0	0	0	0.00788568	1.12698e-26	56.4978	225.49	0.414222	0.0941081	0.854161	8.44321e-05	COBW domain containing 1|COBW domain containing 3|COBW domain containing 2|COBW domain containing 5|COBW domain containing 7|COBW domain containing 6	NM_018491.3,NM_001145356.1,NM_001145355.1|NM_201453.2|NM_172003.3|NM_001024916.2|XM_001717050.3|NM_001085457.1
SRPX2	PH_hs_0042333	285	360	873	878	1.54469e-05	8.24772e-06	1.45926e-06	1.4475e-06	0	0	0	0	6.03315e-18	7.56508e-40	321.43	875.503	0.116928	0.0759943	0.853903	4.49415e-05	sushi-repeat containing protein, X-linked 2	NM_014467.2
TRIM44	PH_hs_0001376	197	359	686	805	4.60503e-05	8.31021e-06	2.15822e-06	1.77318e-06	0	0	0	0	9.06131e-07	1.56123e-18	274.649	745.292	0.209498	0.114851	0.853439	0.0180232	tripartite motif containing 44	NM_017583.4
DNAJC9	PH_hs_0030029	1096	1960	3452	4342	1.08339e-06	6.79614e-07	4.51021e-07	4.12422e-07	0	0	0	0	1.22759e-07	2.24805e-15	1510.24	3895.42	0.193758	0.127547	0.85338	0.0125908	DnaJ (Hsp40) homolog, subfamily C, member 9	NM_015190.3
GPD2	PH_hs_0037156	54	150	338	435	0.00317517	0.00020202	9.69489e-06	5.24604e-06	-50	0	0	0	0.00119324	1.22859e-12	99.8587	386.327	0.329232	0.14274	0.853295	0.00125216	glycerol-3-phosphate dehydrogenase 2 (mitochondrial)	NM_000408.4,NM_001083112.2
PIGA	PH_hs_0000007	728	803	1972	2096	1.92618e-06	1.65065e-06	1.47225e-06	5.95017e-07	0	0	0	0	3.45679e-39	1.70683e-30	765.53	2033.8	0.0766661	0.0875837	0.853087	8.36606e-06	phosphatidylinositol glycan anchor biosynthesis, class A	NM_002641.3,NR_033836.1,NR_033835.1,NM_020473.3
ARCN1	PH_hs_0043492	3054	3475	7891	8227	4.77371e-07	4.49704e-07	3.50878e-07	3.48035e-07	0	0	0	0	1.24195e-36	2.82206e-36	3262.1	8058.49	0.0794459	0.0798581	0.852383	2.84906e-07	archain 1	NM_001142281.1,NM_001655.4
RORA	PH_hs_0024015	943	1047	2617	2614	0.000287617	1.14542e-06	5.17825e-07	5.18158e-07	0	0	0	0	2.22071e-28	2.22386e-41	994.876	2615.54	0.0910214	0.0745003	0.852038	4.10114e-05	RAR-related orphan receptor A	NM_134262.2,NM_002943.3,NM_134260.2,NM_134261.2
ALDH1L2	PH_hs_0046287	149	154	414	413	0.000114946	0.00021596	5.87796e-06	5.91973e-06	0	0	0	0	1.4963e-18	1.25499e-33	151.751	413.507	0.114788	0.0831343	0.851695	0.000238465	aldehyde dehydrogenase 1 family, member L2	NM_001034173.3,NR_027752.1
FLCN	PH_hs_0044406	205	253	645	603	4.07362e-05	2.16618e-05	2.36662e-06	2.67777e-06	0	0	0	0	2.79762e-18	1.26716e-25	228.371	624.085	0.115734	0.0961732	0.850446	0.000242437	folliculin	NM_144606.5
STX3	PH_hs_0004706	730	888	2063	2206	1.91889e-06	1.42445e-06	6.03052e-07	5.74821e-07	0	0	0	0	8.67023e-24	2.03986e-30	807.067	2134.27	0.100128	0.0877028	0.850056	1.57408e-06	syntaxin 3	NM_001178040.1,NM_004177.4
KLHDC10	PH_hs_0035672	51	74	170	190	0.449233	0.0011783	7.40035e-05	5.16467e-05	-50	0	0	0	0.285407	1.24575e-17	62.0815	179.966	1.76413	0.118088	0.849545	0.000222289	kelch domain containing 10	NM_014997.3
CAPRIN1	PH_hs_0060623	2930	4811	8813	9850	4.8736e-07	4.00156e-07	3.43634e-07	3.37217e-07	0	0	0	0	2.47446e-09	4.12996e-25	3833.19	9329.73	0.170973	0.0972318	0.849444	0.00371433	cell cycle associated protein 1	NM_005898.4
RNF135	PH_hs_0028839	167	331	571	770	7.81839e-05	1.02276e-05	2.96526e-06	1.76089e-06	0	0	0	0	7.55545e-06	1.34943e-11	245.528	670.144	0.231104	0.150102	0.848945	0.0401037	ring finger protein 135	NM_001184992.1,NM_197939.1,NM_032322.3
RPTOR	PH_hs_0023108	120	218	382	539	0.0012296	3.36256e-05	7.12173e-06	3.32063e-06	0	0	0	0	3.25245e-06	5.45246e-10	166.975	460.218	0.221765	0.164054	0.848497	0.0444756	regulatory associated protein of MTOR, complex 1	NM_001163034.1,NM_020761.2
HSPA13	PH_hs_0032808	229	326	644	701	2.90341e-05	0.424815	2.37346e-06	2.09571e-06	0	0	0	0	0.259273	1.734e-25	275.769	672.405	1.54898	0.0964509	0.848244	0.0841964	heat shock protein 70kDa family, member 13	NM_006948.4
PTGES	PH_hs_0008761	5499	5994	13857	13733	4.30676e-07	3.73667e-07	3.21873e-07	3.22208e-07	0	0	0	0	7.46584e-41	9.67765e-41	5748.42	13795.4	0.0750034	0.0751125	0.847604	6.05132e-06	prostaglandin E synthase	NM_004878.4
SEC24A	PH_hs_0012278	64	87	229	200	0.00185587	0.000689342	2.89521e-05	4.44976e-05	-50	0	0	0	1.16959e-09	5.50265e-16	75.1137	214.556	0.167439	0.124765	0.846945	0.00226742	SEC24 family, member A (S. cerevisiae)	NM_021982.2
STK17B	PH_hs_0022203	173	270	572	618	6.9829e-05	2.33296e-05	2.95622e-06	2.55683e-06	0	0	0	0	6.29563e-09	4.75912e-26	219.63	594.924	0.1757	0.0953213	0.846325	0.00520688	serine/threonine kinase 17b	NM_004226.3
BRWD1	PH_hs_0045149	263	314	807	761	1.92449e-05	1.17558e-05	1.63943e-06	1.79419e-06	0	0	0	0	3.87263e-22	1.91142e-27	287.944	784.095	0.104131	0.0926753	0.846142	9.66771e-05	bromodomain and WD repeat domain containing 1	NM_001007246.2
SLC25A19	PH_hs_0024557	494	604	1337	1604	3.9799e-06	2.66633e-06	9.27704e-07	7.32602e-07	0	0	0	0	2.84316e-22	9.03277e-18	547.619	1470.03	0.103788	0.11757	0.845906	0.000155854	solute carrier family 25 (mitochondrial thiamine pyrophosphate carrier), member 19	NM_001126122.1,NM_001126121.1,NM_021734.4
SLC36A1	PH_hs_0047504	28	134	341	335	0.0602611	0.000162018	9.47812e-06	9.92416e-06	-50	0	0	0	0.0116106	1.43914e-29	78.5572	338.016	0.440572	0.0890408	0.84495	0.000111904	solute carrier family 36 (proton/amino acid symporter), member 1	NM_078483.2
FBXO8	PH_hs_0040622	130	129	323	373	0.000245554	0.000183673	1.09079e-05	7.55158e-06	0	0	0	0	2.10407e-15	5.14019e-18	129.846	347.913	0.127412	0.116676	0.844678	0.000840602	F-box protein 8	NM_012180.2
ARIH1	PH_hs_0010737	1184	1851	3926	3745	9.90585e-07	6.5146e-07	4.27704e-07	4.35796e-07	0	0	0	0	2.33149e-10	6.77921e-32	1504.63	3835.88	0.160512	0.0855085	0.844589	0.00224377	ariadne homolog, ubiquitin-conjugating enzyme E2 binding protein, 1 (Drosophila)	NM_005744.3
ATP6AP1	PH_hs_0028734	822	1195	2138	3259	1.59391e-06	9.80361e-07	5.86979e-07	5.18167e-07	0	0	0	0	1.77617e-12	6.77458e-09	1001.7	2696.48	0.143803	0.176088	0.844479	0.0120873	ATPase, H+ transporting, lysosomal accessory protein 1	NM_001183.4
ZNF217	PH_hs_0009333	1000	1305	2948	3009	1.21388e-06	8.9179e-07	4.85855e-07	4.80875e-07	0	0	0	0	3.88608e-18	2.2344e-40	1147.75	2978.43	0.11624	0.0754676	0.844311	3.0801e-05	zinc finger protein 217	NM_006526.2
ASXL1	PH_hs_0046296	65	127	298	342	0.00173356	0.000193547	1.35438e-05	5.818e-05	-50	0	0	0	2.7582e-05	8.31377e-17	94.6919	319.924	0.247979	0.121297	0.84394	0.000468556	additional sex combs like 1 (Drosophila)	NM_001164603.1
CLCF1	PH_hs_0022919	994	1079	2814	2623	1.22351e-06	1.10401e-06	4.97679e-07	5.17175e-07	0	0	0	0	8.42172e-37	5.92773e-28	1036.95	2718.89	0.079253	0.0917647	0.843154	7.12616e-05	cardiotrophin-like cytokine factor 1	NM_001166212.1,NM_013246.2
FICD	PH_hs_0012809	405	464	1141	1186	6.19152e-06	4.54544e-06	1.03334e-06	4.4269e-06	0	0	0	0	2.29967e-29	2.93309e-32	434.107	1163.43	0.0893709	0.0849931	0.842673	3.71521e-06	FIC domain containing	NM_007076.2
KIDINS220	PH_hs_0001022	58	128	294	347	0.00245292	0.3595	1.40807e-05	9.05382e-06	-50	0	0	0	0.180425	2.2404e-16	91.4849	320.407	1.0944	0.12308	0.841169	0.466973	kinase D-interacting substrate, 220kDa	NM_020738.2
EEF1E1	PH_hs_0043741	692	1251	2166	2865	2.09541e-06	9.32409e-07	5.81829e-07	4.93018e-07	0	0	0	0	2.12866e-07	6.01629e-13	959.969	2514.25	0.197743	0.140746	0.840936	0.0176325	eukaryotic translation elongation factor 1 epsilon 1	NM_001135650.1,NM_004280.4
TAF4B	PH_hs_0032088	182	230	550	562	5.92596e-05	2.85885e-05	3.18986e-06	3.05948e-06	0	0	0	0	2.63299e-16	1.19007e-34	205.314	555.986	0.123378	0.0818216	0.840306	0.000144279	TAF4b RNA polymerase II, TATA box binding protein (TBP)-associated factor, 105kDa	NM_005640.1
PSPH	PH_hs_0043348	285	343	723	1000	1.53354e-05	9.33113e-06	1.94777e-06	1.21464e-06	0	0	0	0	9.0559e-22	5.64965e-11	313.333	861.004	0.105093	0.155076	0.84012	0.0025859	phosphoserine phosphatase	NM_004577.3
SLC43A3	PH_hs_0022243	340	448	1167	957	9.55555e-06	4.91754e-06	1.0069e-06	1.28571e-06	0	0	0	0	7.54046e-16	1.24429e-15	392.284	1062.4	0.125372	0.126355	0.839939	0.00247663	solute carrier family 43, member 3	NM_199329.1,NM_017611.2,NM_014096.2
C11orf91	PH_hs_0060705	1512	1575	3914	3985	7.86134e-07	7.4443e-07	4.28216e-07	4.25251e-07	0	0	0	0	4.74681e-30	2.13278e-41	1545.76	3949.42	0.0882738	0.0744831	0.83977	4.23175e-05	chromosome 11 open reading frame 91	NM_001166692.1
SLC25A38	PH_hs_0000846	2083	2876	5898	6323	5.97595e-07	3.55334e-06	3.7518e-07	3.68583e-07	0	0	0	0	2.18538e-14	7.28305e-31	2465.88	6109.8	0.13246	0.0870213	0.839687	0.000162454	solute carrier family 25, member 38	NM_017875.2
ZBTB40	PH_hs_0019680	258	353	773	826	2.03403e-05	0.0155015	2.76994e-06	1.58416e-06	0	0	0	0	1.03879e-07	4.60737e-28	303.889	799.414	0.192594	0.0915722	0.839461	0.00664377	zinc finger and BTB domain containing 40	NM_014870.3,NM_001083621.1
EIF4A2	PH_hs_0049593	1088	1897	3505	3990	1.09295e-06	6.39356e-07	4.48051e-07	4.25055e-07	0	0	0	0	4.78336e-08	9.00786e-23	1476.03	3746.66	0.18745	0.102539	0.837647	0.0083577	eukaryotic translation initiation factor 4A2	NM_001967.3
ELOVL5	PH_hs_0060347	194	222	557	568	4.83385e-05	3.18639e-05	3.11185e-06	3.0012e-06	0	0	0	0	1.35951e-24	3.99471e-35	207.818	562.487	0.0983354	0.0812339	0.837616	9.15275e-06	ELOVL fatty acid elongase 5	NM_001242831.1
RRS1	PH_hs_0004150	357	532	1044	1330	2.08522e-05	3.40848e-06	1.1497e-06	8.74472e-07	0	0	0	0	8.4366e-11	3.04794e-14	441.238	1186.49	0.156558	0.133227	0.837382	0.00480715	RRS1 ribosome biogenesis regulator homolog (S. cerevisiae)	NM_015169.3
DNAJB6	PH_hs_0040141	408	568	1289	1291	6.08407e-06	2.99535e-06	9.03395e-07	9.01821e-07	0	0	0	0	1.59257e-13	2.4231e-40	485.221	1290.01	0.137243	0.0755023	0.836662	0.000511139	DnaJ (Hsp40) homolog, subfamily B, member 6	NM_058246.3,NM_005494.2
SGPL1	PH_hs_0049353	376	477	1106	1162	7.40343e-06	4.27854e-06	1.07187e-06	1.96616e-06	0	0	0	0	1.84761e-18	1.98902e-31	425.039	1133.91	0.115104	0.0861845	0.835956	5.54583e-05	sphingosine-1-phosphate lyase 1	NM_003901.3
ARHGEF2	PH_hs_0016573	2615	3183	6866	7360	5.18049e-07	5.33634e-07	3.61437e-07	4.11542e-07	0	0	0	0	2.37738e-25	8.36681e-31	2892.03	7112.19	0.0967327	0.0871122	0.835678	3.90008e-06	Rho/Rac guanine nucleotide exchange factor (GEF) 2	NM_001162384.1,NM_001162383.1,NM_004723.3
DHRS2	PH_hs_0014078	90	117	256	282	0.000612538	0.000331272	2.08076e-05	1.59549e-05	0	0	0	0	5.37158e-12	1.02963e-20	103.083	268.956	0.147142	0.108	0.835525	0.00151779	dehydrogenase/reductase (SDR family) member 2	NM_005794.3,NM_182908.4
ZC3HAV1	PH_hs_0044157	108	102	259	290	0.000334355	0.000403141	2.01401e-05	1.49954e-05	0	0	0	0	1.91902e-12	1.95779e-19	105.41	274.447	0.14403	0.111865	0.834754	0.00223094	zinc finger CCCH-type, antiviral 1	NM_024625.3
SLC31A1	PH_hs_0019597	603	788	1802	1834	2.67472e-06	1.69937e-06	6.65209e-07	6.56247e-07	0	0	0	0	2.09277e-17	3.57707e-40	692.612	1817.97	0.11894	0.0756695	0.833545	6.18796e-05	solute carrier family 31 (copper transporters), member 1	NM_001859.3
HSPA14	PH_hs_0025216	431	759	1385	1730	5.35782e-06	1.80113e-06	8.39612e-07	6.87363e-07	0	0	0	0	1.26553e-07	2.14218e-15	588.296	1556.89	0.193972	0.127448	0.833472	0.015242	heat shock 70kDa protein 14	NM_016299.2
PIM3	PH_hs_0034689	2813	2883	7030	6994	4.97799e-07	4.91428e-07	3.5952e-07	3.59936e-07	0	0	0	0	2.29271e-28	1.99461e-41	2853.32	7012.16	0.0910452	0.0744556	0.831739	5.72931e-05	pim-3 oncogene	NM_001001852.3
HIST1H2BL|HIST1H2BK|HIST2H2BF|HIST2H2BA|HIST1H2BM|HIST1H2BD|HIST1H2BF|HIST1H2BB|HIST1H2BE|HIST1H2BI|HIST2H2BC	PH_hs_0029201	270	447	836	1069	1.78487e-05	4.9337e-06	1.95883e-06	1.1169e-06	0	0	0	0	2.36985e-08	7.37633e-14	354.975	952.086	0.183123	0.13533	0.831561	0.0113692	histone cluster 1, H2bl|histone cluster 1, H2bk|histone cluster 2, H2bf|histone cluster 2, H2ba (pseudogene)|histone cluster 1, H2bm|histone cluster 1, H2bd|histone cluster 1, H2bf|histone cluster 1, H2bb|histone cluster 1, H2be|histone cluster 1, H2bi|histone cluster 2, H2bc (pseudogene)	NM_003519.3|NM_080593.2|NM_001024599.4,NM_001161334.1|NR_027337.1|NM_003521.2|NM_021063.3,NM_138720.2|NM_003522.3|NM_021062.2|NM_003523.2|NM_003525.2|NR_036461.1
PDXDC1	PH_hs_0060910	66	92	212	237	0.00168397	0.0199904	3.66354e-05	2.61139e-05	-50	0	0	0	1.36351e-06	1.09326e-18	78.5476	224.457	0.213202	0.114322	0.830287	0.00209023	pyridoxal-dependent decarboxylase domain containing 1	NM_015027.2
EDC3	PH_hs_0022396	449	575	1380	1320	4.88541e-06	2.95889e-06	8.61455e-07	8.82699e-07	0	0	0	0	3.22962e-18	6.18867e-31	510.128	1350.13	0.115954	0.086915	0.828983	0.000149867	enhancer of mRNA decapping 3 homolog (S. cerevisiae)	NM_001142444.1,NM_001142443.1,NM_025083.3
CCNL1	PH_hs_0000491	2264	2842	6103	6430	5.65158e-07	4.95092e-07	3.71855e-07	3.67056e-07	0	0	0	0	5.20909e-22	5.27102e-34	2544.92	6265.99	0.104464	0.0826436	0.827982	9.54482e-06	cyclin L1	NM_020307.2
LEPROT	PH_hs_0044868	78	154	255	395	0.00107015	0.000101923	2.21569e-05	0.00072271	0	0	0	0	2.30947e-05	1.27656e-06	114.392	324.748	0.245452	0.212592	0.827131	0.123242	leptin receptor overlapping transcript	NM_017526.4,NM_001198681.1
PTTG3P|PTTG1|PTTG2	PH_hs_0030777	863	1864	2870	3991	1.48934e-06	6.48289e-07	4.92586e-07	4.25221e-07	0	0	0	0	1.42611e-05	2.96616e-11	1341.92	3428.49	0.238951	0.152778	0.826941	0.0498443	pituitary tumor-transforming 3, pseudogene|pituitary tumor-transforming 1|pituitary tumor-transforming 2	NR_002734.1|NM_004219.2|NM_006607.2
MFSD12	PH_hs_0036547	658	1047	1799	1948	2.28514e-06	0.37168	6.66062e-07	6.27344e-07	0	0	0	0	0.156878	2.56397e-28	844.914	1873.25	0.992682	0.0911291	0.82667	0.0685881	major facilitator superfamily domain containing 12	NM_001042680.1,NM_021731.2
BEX1	PH_hs_0016413	1624	1852	4180	4562	7.24778e-07	6.51189e-07	4.17718e-07	4.05091e-07	0	0	0	0	3.50874e-35	6.11911e-28	1736.63	4370.36	0.0811649	0.0917891	0.826609	3.98587e-06	brain expressed, X-linked 1	NM_018476.3
PSEN1	PH_hs_0048575	189	316	612	750	0.00248007	1.16828e-05	2.60263e-06	1.8387e-06	0	0	0	0	3.95761e-07	1.08565e-15	249.959	680.756	0.202534	0.126085	0.826117	0.0210834	presenilin 1	NM_000021.3,NM_007318.2
EGLN2|RAB4B-EGLN2	PH_hs_0016134	77	92	219	213	0.00121777	0.00224936	3.33836e-05	3.61025e-05	0	0	0	0	5.68157e-13	6.5628e-25	84.3356	216.014	0.14059	0.0976564	0.825945	0.00117968	egl nine homolog 2 (C. elegans)|RAB4B-EGLN2 readthrough (non-protein coding)	NM_053046.3,NM_080732.3|NR_037791.1
PARL	PH_hs_0049528	55	97	218	254	0.00287316	0.0216974	3.36199e-05	2.12862e-05	-50	0	0	0	0.000197996	3.52911e-16	75.1411	235.937	0.282267	0.123923	0.824775	0.00418637	presenilin associated, rhomboid-like	NM_001037639.1,NM_018622.5
ZC3H8	PH_hs_0026868	91	132	297	281	0.00059088	0.000171101	1.36736e-05	1.59443e-05	0	0	0	0	2.60621e-09	1.06807e-23	110.754	289.033	0.171226	0.100336	0.824656	0.00870667	zinc finger CCCH-type containing 8	NM_032494.2
NOSIP	PH_hs_0027063	615	849	1767	2035	2.57913e-06	1.51917e-06	6.75685e-07	6.07386e-07	0	0	0	0	2.13135e-14	3.19385e-21	727.98	1900.53	0.132403	0.106571	0.82456	0.000516626	nitric oxide synthase interacting protein	NM_001270960.1,NM_015953.4
C16orf87	PH_hs_0035909	484	699	1436	1655	4.14702e-06	2.06008e-06	8.10661e-07	1.20204e-06	0	0	0	0	2.66393e-12	1.2084e-20	587.606	1545.12	0.145	0.1082	0.824373	0.00167804	chromosome 16 open reading frame 87	NM_001001436.2
TUSC2	PH_hs_0035338	268	396	799	963	1.92912e-05	6.53024e-06	1.68108e-06	1.27512e-06	0	0	0	0	7.09863e-11	5.44517e-17	329.632	880.711	0.155915	0.12056	0.824202	0.00316044	tumor suppressor candidate 2	NM_007275.1
VPS13B	PH_hs_0044504	84	102	244	233	0.000768544	0.000403541	2.39921e-05	2.75209e-05	0	0	0	0	1.83955e-14	1.52125e-23	92.7819	238.523	0.132068	0.100692	0.823825	0.00122508	vacuolar protein sorting 13 homolog B (yeast)	NM_015243.2
BBIP1	PH_hs_0060181	94	134	280	302	0.000549663	0.00355008	1.61059e-05	1.30702e-05	0	0	0	0	4.88273e-08	3.8845e-23	113.285	290.964	0.187581	0.101653	0.82338	0.00840884	BBSome interacting protein 1	NM_001195304.1
BASP1	PH_hs_0026605	359	604	1173	1334	8.30556e-06	2.71699e-06	1.00104e-06	8.7189e-07	0	0	0	0	2.93344e-08	5.67008e-22	476.584	1253.22	0.184406	0.10456	0.822196	0.00933644	brain abundant, membrane attached signal protein 1	NM_001271606.1,NM_006317.4
RNASEH1	PH_hs_0026690	1217	1947	3484	4459	9.61074e-07	6.27123e-07	4.4922e-07	4.08254e-07	0	0	0	0	8.73364e-10	1.68962e-14	1567.72	3969.77	0.16612	0.131876	0.821971	0.00744101	ribonuclease H1	NM_002936.3
ZNF202	PH_hs_0022294	47	72	156	186	0.00461669	0.0012722	9.782e-05	5.62465e-05	-50	0	0	0	6.3865e-07	7.40125e-14	59.0241	170.947	0.206473	0.135338	0.821367	0.00114381	zinc finger protein 202	NM_003455.2
MAP1LC3B	PH_hs_0023988	1871	1860	4516	4824	6.46089e-07	6.49e-07	4.06496e-07	3.97739e-07	0	0	0	0	4.54511e-24	2.52948e-31	1870.41	4669.5	0.0994922	0.0863377	0.821181	0.000208593	microtubule-associated protein 1 light chain 3 beta	NM_022818.4
MARS	PH_hs_0023984	6232	7800	15991	16666	3.69902e-07	3.51692e-07	3.16971e-07	3.15693e-07	0	0	0	0	9.90229e-23	1.36609e-36	6994.31	16327.5	0.10264	0.0794934	0.820399	5.99041e-06	methionyl-tRNA synthetase	NM_004990.3
FAM21C|FAM21A|FAM21B	PH_hs_0049501	517	961	1773	2025	3.6239e-06	1.27887e-06	6.73803e-07	1.6059e-05	0	0	0	0	5.88616e-07	1.57038e-19	729.76	1898.56	0.205785	0.111562	0.819908	0.0291231	family with sequence similarity 21, member C|family with sequence similarity 21, member A|family with sequence similarity 21, member B	NM_001169106.1,NM_001169107.1,NM_015262.2|NM_001005751.1|NM_018232.1
KLF6	PH_hs_0000446	1284	1654	3633	3738	9.07054e-07	7.13496e-07	4.41268e-07	4.36126e-07	0	0	0	0	2.47473e-19	1.10792e-38	1463.42	3685.36	0.112191	0.0771933	0.819349	2.34974e-05	Kruppel-like factor 6	NR_027653.1,NM_001160125.1,NM_001160124.1,NM_001300.5
DSE	PH_hs_0024443	105	119	267	310	0.000367034	0.494886	1.88082e-05	1.2186e-05	0	0	0	0	0.479817	4.65511e-17	111.929	288.425	19.7575	0.12029	0.818629	0.000422616	dermatan sulfate epimerase	NM_001080976.1,NM_013352.2
ATP1A1	PH_hs_0032937	5031	7308	13647	15008	3.92573e-07	3.56486e-07	3.22445e-07	3.19049e-07	0	0	0	0	4.71161e-13	2.89618e-27	6128.02	14325.2	0.140082	0.093005	0.81853	0.000755801	ATPase, Na+/K+ transporting, alpha 1 polypeptide	NM_001160234.1,NM_000701.7,NM_001160233.1
DVL3	PH_hs_0024349	135	181	397	440	0.000158491	6.02887e-05	6.49113e-06	5.11658e-06	0	0	0	0	1.44919e-12	5.44136e-22	157.245	418.427	0.143214	0.104513	0.818115	0.00171158	dishevelled, dsh homolog 3 (Drosophila)	NM_004423.3
ZNF134	PH_hs_0027484	318	451	1023	994	1.13694e-05	4.83711e-06	1.1792e-06	1.2859e-06	0	0	0	0	1.91601e-12	6.34114e-33	382.137	1008.57	0.144025	0.0840744	0.817515	0.00120034	zinc finger protein 134	NM_003435.3
RPS2|RPS2P32	PH_hs_0033595	6150	6833	14793	15593	3.72415e-07	3.63987e-07	3.19541e-07	3.17783e-07	0	0	0	0	3.33509e-43	3.12025e-34	6490.58	15191.7	0.0728298	0.0823512	0.817049	4.73935e-06	ribosomal protein S2|ribosomal protein S2 pseudogene 32	NM_002952.3|NR_026676.1
ZSWIM4	PH_hs_0015498	263	295	733	757	1.92442e-05	3.25252e-05	1.90475e-06	1.80881e-06	0	0	0	0	2.29274e-28	5.2206e-34	278.894	744.966	0.0910453	0.0826382	0.81702	1.33649e-05	zinc finger, SWIM-type containing 4	NM_023072.2
CAMTA1	PH_hs_0062033	657	1148	2292	2271	2.29122e-06	1.02653e-06	5.60727e-07	5.64061e-07	0	0	0	0	6.84737e-08	4.2383e-39	892.494	2281.57	0.189779	0.0767576	0.816345	0.0101659	calmodulin binding transcription activator 1	NR_038934.1,NM_001242701.1
SARS	PH_hs_0025953	857	1248	2442	3110	1.49865e-06	9.34819e-07	5.39147e-07	0.00038667	0	0	0	0	1.93598e-12	3.09768e-11	1045.36	2774.81	0.144055	0.15293	0.816104	0.0193465	seryl-tRNA synthetase	NM_006513.3
FRMD6	PH_hs_0061550	552	646	1597	1526	3.16723e-06	2.36131e-06	7.35413e-07	7.65928e-07	0	0	0	0	1.02881e-27	4.50288e-31	598.142	1561.65	0.0921902	0.0867085	0.815096	4.40153e-05	FERM domain containing 6	NM_001267047.1,NM_001267046.1,NM_001042481.2,NM_152330.3
VEGFA	PH_hs_0045863	1374	2052	4005	4465	8.52014e-07	6.03822e-07	4.24441e-07	4.08061e-07	0	0	0	0	9.12478e-12	3.82709e-25	1700.34	4234.21	0.148823	0.0971625	0.814981	0.00146348	vascular endothelial growth factor A	NM_001171630.1,NM_001171629.1,NM_001171628.1,NM_001171627.1,NM_001171626.1,NM_001171625.1,NM_001171624.1,NM_001171623.1,NM_001171622.1,NM_001033756.2,NM_001025370.2,NM_001025369.2,NM_001025368.2,NM_001025367.2,NM_003376.5,NM_001025366.2,NM_001204385.1,NM_001204384.1
OSGEP	PH_hs_0042320	512	506	1282	1337	0.00983256	3.77802e-06	9.08465e-07	8.69827e-07	0	0	0	0	2.85068e-11	5.68508e-34	510.413	1309.42	0.15264	0.082686	0.814452	0.00479942	O-sialoglycoprotein endopeptidase	NM_017807.3
ACTL6A	PH_hs_0025396	909	1317	2449	3243	1.37936e-06	8.83412e-07	5.38496e-07	4.63935e-07	0	0	0	0	1.15678e-12	6.20887e-13	1105.59	2844.58	0.142569	0.140832	0.814357	0.00461378	actin-like 6A	NM_178042.2,NM_177989.2,NM_004301.3
SLC39A14	PH_hs_0043502	127	152	349	404	0.000212022	0.000106432	8.9202e-06	0.00905171	0	0	0	0	1.05296e-17	2.12485e-10	139.223	376.404	0.117816	0.160139	0.814135	0.0291064	solute carrier family 39 (zinc transporter), member 14	NM_001135153.1,NM_001128431.2,NM_015359.4
CDC42EP5	PH_hs_0028374	202	188	498	529	0.00389103	5.33982e-05	3.90646e-06	3.44766e-06	0	0	0	0	2.36085e-10	9.55526e-28	195.833	513.45	0.160563	0.0921328	0.813899	0.00546245	CDC42 effector protein (Rho GTPase binding) 5	NM_145057.2
ACO1	PH_hs_0023784	1522	1724	3989	4120	7.67686e-07	2.02297e-06	4.25101e-07	4.19948e-07	0	0	0	0	5.9665e-35	6.886e-38	1621.99	4054.31	0.0814484	0.0780425	0.812825	3.13988e-06	aconitase 1, soluble	NM_002197.2
KPNA4	PH_hs_0032511	276	416	872	937	1.67712e-05	5.81356e-06	1.46208e-06	1.32271e-06	0	0	0	0	2.20943e-10	4.82714e-28	343.367	904.393	0.160296	0.0916077	0.81254	0.00267613	karyopherin alpha 4 (importin alpha 3)	NM_002268.4
NPM1	PH_hs_0045798	7948	11320	21528	22337	3.50377e-07	3.30251e-07	3.08925e-07	3.08093e-07	0	0	0	0	6.17699e-14	1.20615e-37	9573.81	21931.3	0.134899	0.0783087	0.812482	0.000435451	nucleophosmin (nucleolar phosphoprotein B23, numatrin)	NM_001037738.2
AKAP2|PALM2-AKAP2	PH_hs_0040022	293	401	884	937	1.41946e-05	6.42993e-06	1.43361e-06	1.3227e-06	0	0	0	0	1.05895e-13	3.95818e-30	345.168	910.415	0.136219	0.0881501	0.812378	0.000486201	A kinase (PRKA) anchor protein 2|PALM2-AKAP2 readthrough	NM_001198656.1,NM_001004065.4,NM_001136562.2|NM_147150.2,NM_007203.4
TSPYL1	PH_hs_0026359	201	344	634	791	4.32672e-05	2.23378e-05	2.44172e-06	1.68892e-06	0	0	0	0	2.0256e-07	8.32871e-15	269.61	712.222	0.197373	0.130308	0.811901	0.0176781	TSPY-like 1	NM_003309.3
HSD17B12	PH_hs_0022489	188	274	419	697	5.3505e-05	0.476787	5.71694e-06	2.07012e-06	0	0	0	0	0.420019	4.17703e-07	229.428	557.498	4.9543	0.202967	0.811528	0.0219242	hydroxysteroid (17-beta) dehydrogenase 12	NM_016142.2
RUNX1	PH_hs_0044660	212	360	723	857	3.66368e-05	1.21122e-05	1.94797e-06	0.276044	0	0	0	0	1.123e-07	0.0222882	283.018	789.765	0.193135	0.497852	0.810167	0.011119	runt-related transcription factor 1	NM_001754.4,NM_001001890.2
SLC1A4	PH_hs_0016122	350	379	986	939	8.87563e-06	7.26642e-06	1.23629e-06	1.31878e-06	0	0	0	0	6.83216e-31	1.87542e-29	364.681	962.599	0.0869795	0.0892268	0.809896	0.000149786	solute carrier family 1 (glutamate/neutral amino acid transporter), member 4	NM_001193493.1,NM_003038.4
HIGD1A	PH_hs_0061183	4461	5991	11925	12391	4.08637e-07	3.73632e-07	3.27913e-07	3.26274e-07	0	0	0	0	5.41526e-17	3.56754e-37	5200.81	12157.3	0.12055	0.0788315	0.809451	0.000101245	HIG1 hypoxia inducible domain family, member 1A	NM_001099669.1,NM_001099668.1,NM_014056.3
THAP1	PH_hs_0048484	93	134	270	314	0.000550659	0.000161939	1.78724e-05	1.1758e-05	0	0	0	0	1.6595e-09	5.27922e-17	112.759	291.923	0.169062	0.120506	0.809088	0.00909319	THAP domain containing, apoptosis associated protein 1	NM_199003.1,NM_018105.2
HPS5	PH_hs_0043508	183	309	589	697	5.87481e-05	1.22785e-05	2.79519e-06	2.07095e-06	0	0	0	0	1.04608e-07	9.54204e-18	243.468	642.811	0.192643	0.117658	0.808504	0.0160773	Hermansky-Pudlak syndrome 5	NM_181508.1,NM_181507.1,NM_007216.3
QTRTD1	PH_hs_0041039	146	176	425	426	0.000122027	6.63289e-05	5.53243e-06	5.50283e-06	0	0	0	0	3.77061e-18	9.08223e-35	160.651	425.504	0.116193	0.0816749	0.807579	0.000205969	queuine tRNA-ribosyltransferase domain containing 1	NM_001256835.1,NM_001256837.1,NM_001256836.1,NM_024638.3
ANKRD13C	PH_hs_0039937	134	229	455	487	0.000161776	2.89456e-05	4.74286e-06	4.09268e-06	0	0	0	0	3.08171e-07	2.36035e-26	179.581	470.948	0.200561	0.0947249	0.806489	0.0215547	ankyrin repeat domain 13C	NM_030816.4
FNIP1	PH_hs_0044241	45	97	182	292	0.00784379	0.000481308	5.92774e-05	1.4351e-05	-50	0	0	0	0.000208925	4.29069e-07	69.8792	236.802	0.283403	0.203184	0.80551	0.0200732	folliculin interacting protein 1	NM_001008738.2,NM_133372.2
CRHBP	PH_hs_0042451	990	1146	2713	2714	1.22992e-06	1.02803e-06	5.07574e-07	5.07486e-07	0	0	0	0	2.96844e-31	7.58383e-42	1066.76	2713.53	0.0864401	0.0740617	0.805492	3.83721e-06	corticotropin releasing hormone binding protein	NM_001882.3
FOSL1	PH_hs_0029612	262	341	800	784	1.94555e-05	9.47697e-06	1.65991e-06	1.71239e-06	0	0	0	0	6.99417e-16	9.48316e-34	300.278	792.04	0.125226	0.0829749	0.804747	0.000349152	FOS-like antigen 1	NM_005438.3
MXD1	PH_hs_0047926	199	202	528	536	4.53193e-05	4.27755e-05	3.46359e-06	3.35764e-06	0	0	0	0	1.39963e-19	1.00352e-35	200.923	531.992	0.111404	0.080508	0.803829	0.00037188	MAX dimerization protein 1	NM_001202514.1,NM_001202513.1,NM_002357.3
ATP13A3	PH_hs_0024172	42	115	258	298	0.033688	0.000273931	2.03548e-05	1.355e-05	-50	0	0	0	0.00173447	2.79841e-17	76.8741	277.93	0.342137	0.119425	0.802975	0.000363132	ATPase type 13A3	NM_024524.3
CFLAR	PH_hs_0045636	1125	1932	3093	3103	1.0504e-06	0.328373	4.7442e-07	4.73676e-07	0	0	0	0	0.10406	7.59504e-43	1512.17	3098.02	0.794438	0.0731486	0.802463	0.0713972	CASP8 and FADD-like apoptosis regulator	NM_001127184.2
PITPNA	PH_hs_0020121	627	969	2007	2029	2.49022e-06	1.26467e-06	6.13413e-07	6.0871e-07	0	0	0	0	2.11015e-10	3.57892e-42	791.451	2017.99	0.160111	0.0737601	0.802446	0.00299211	phosphatidylinositol transfer protein, alpha	NM_006224.3
LOC392288	PH_hs_0062365	2149	2689	6124	5604	5.8505e-07	5.10035e-07	3.7153e-07	3.80389e-07	0	0	0	0	2.75329e-22	6.12576e-26	2411.54	5865.03	0.103752	0.0955387	0.800822	0.000185664	microtubule-associated proteins 1A/1B light chain 3B-like	XM_003960443.1,XM_373277.7,XM_001716795.1
DSCR4	PH_hs_0002046	448	256	782	776	0.0219019	2.081e-05	1.73627e-06	1.80558e-06	0	0	0	0	0.00114037	3.81864e-36	357.663	779.021	0.32776	0.0800116	0.800663	0.113312	Down syndrome critical region gene 4	NM_005867.2
CSNK1G1	PH_hs_0019200	174	365	657	715	6.84952e-05	1.33088e-05	2.29126e-06	2.53163e-06	0	0	0	0	2.2635e-05	2.29006e-25	265.405	685.903	0.245171	0.0966991	0.799115	0.0526157	casein kinase 1, gamma 1	NM_022048.3
TUFT1	PH_hs_0014581	140	159	382	402	0.000140006	9.179e-05	7.1229e-06	6.30208e-06	0	0	0	0	1.16053e-22	9.70787e-28	149.397	391.969	0.10281	0.0921451	0.798064	2.64188e-05	tuftelin 1	NM_001126337.1,NM_020127.2
ENY2	PH_hs_0025886	314	455	831	1199	1.17579e-05	4.74298e-06	1.56767e-06	9.76768e-07	0	0	0	0	1.08652e-11	6.55284e-10	381.938	1014.34	0.14939	0.164851	0.797678	0.0130179	enhancer of yellow 2 homolog (Drosophila)	NM_001193557.1,NM_020189.5,NR_036472.1,NR_036471.1
COX7A2	PH_hs_0004116	2882	3719	6861	8969	5.32858e-07	4.37024e-07	3.61498e-07	3.42567e-07	0	0	0	0	1.12929e-19	1.25097e-13	3287.82	7911.24	0.111112	0.136634	0.797061	0.00218892	cytochrome c oxidase subunit VIIa polypeptide 2 (liver)	NM_001865.3,NR_029466.1
GPR150	PH_hs_0048345	79	90	205	219	0.00172032	0.00558694	4.06436e-05	3.32034e-05	0	0	0	0	2.51486e-13	3.05001e-22	84.4354	211.977	0.138418	0.103866	0.796938	0.000973044	G protein-coupled receptor 150	NM_199243.1
SH3BGR	PH_hs_0003368	69	97	213	250	0.471061	0.00629128	3.61741e-05	2.23321e-05	-50	0	0	0	0.37321	1.07378e-15	82.5076	231.435	3.0925	0.126063	0.796305	0.00255635	SH3 domain binding glutamic acid-rich protein	NM_001001713.1,NM_007341.2
TPRA1	PH_hs_0000646	364	387	994	968	8.02281e-06	6.90081e-06	1.22332e-06	1.26662e-06	0	0	0	0	3.03336e-28	2.57643e-33	375.858	981.061	0.0912555	0.0835478	0.795917	0.000162683	transmembrane protein, adipocyte asscociated 1	NM_001142646.2,NM_001136053.2,NR_073377.1
SETD7	PH_hs_0048000	658	935	1912	2117	2.28586e-06	1.32667e-06	6.35966e-07	5.91738e-07	0	0	0	0	3.37045e-13	1.96552e-25	791.568	2014.15	0.139187	0.0965625	0.794378	0.000897045	SET domain containing (lysine methyltransferase) 7	NM_030648.2
PVR	PH_hs_0010286	3049	4231	8396	8640	4.77754e-07	4.15882e-07	3.46697e-07	3.44867e-07	0	0	0	0	4.79551e-15	2.72777e-39	3619.55	8517.67	0.129123	0.0765602	0.793866	0.000337999	poliovirus receptor	NM_001135769.1,NM_001135768.1,NM_006505.3
ATP6V0C|ATP6V0CP3	PH_hs_0042760	4941	10407	15842	18319	3.94744e-07	3.36946e-07	3.17269e-07	3.12975e-07	0	0	0	0	7.23106e-06	1.36388e-21	7556.71	17076.2	0.230589	0.105567	0.793605	0.0393795	ATPase, H+ transporting, lysosomal 16kDa, V0 subunit c|ATPase, H+ transporting, lysosomal 16kDa, V0 subunit c pseudogene 3	NM_001198569.1,NM_001694.3|NR_037141.1
GTPBP4	PH_hs_0012374	1646	2014	4285	4662	7.16448e-07	6.11868e-07	4.13991e-07	4.02173e-07	0	0	0	0	1.998e-24	2.10607e-28	1825.36	4472.87	0.0987	0.0909818	0.791952	1.2019e-05	GTP binding protein 4	NM_012341.2
MTSS1	PH_hs_0004482	392	443	1027	1137	6.69082e-06	5.03729e-06	1.17339e-06	1.03748e-06	0	0	0	0	2.41393e-31	1.37293e-24	417.264	1081.81	0.0863078	0.0983446	0.79147	2.71523e-05	metastasis suppressor 1	NM_014751.4
TIAL1	PH_hs_0023874	948	1553	2556	3739	1.30204e-06	7.53826e-07	5.24862e-07	4.3636e-07	0	0	0	0	3.49261e-09	7.53777e-10	1238.51	3145.37	0.172673	0.165466	0.791305	0.0225605	TIA1 cytotoxic granule-associated RNA binding protein-like 1	NM_003252.3,NM_001033925.1
ACP1	PH_hs_0022450	3958	6048	10910	11981	4.2637e-07	3.73933e-07	1.44363e-06	3.27813e-07	0	0	0	0	3.05896e-11	2.56927e-26	4963.29	11443.7	0.152886	0.0947965	0.790701	0.00334784	acid phosphatase 1, soluble	NM_007099.3,NM_004300.3,NR_024080.1
COX7A2L	PH_hs_0033277	3553	6937	10392	13595	4.45429e-07	3.60595e-07	3.34403e-07	3.22591e-07	0	0	0	0	1.30971e-06	1.25064e-13	5173.61	11987.8	0.212829	0.136634	0.790255	0.0347817	cytochrome c oxidase subunit VIIa polypeptide 2 like	NM_004718.2
AP5Z1	PH_hs_0035935	800	929	2148	2140	1.66009e-06	1.33859e-06	5.85107e-07	0.0874651	0	0	0	0	3.97407e-30	1.13313e-07	863.428	2144.04	0.0881528	0.193197	0.790119	0.0446006	adaptor-related protein complex 5, zeta 1 subunit	NM_014855.2
RIPK4	PH_hs_0003641	91	127	273	277	0.000589348	0.000193551	1.73195e-05	1.66018e-05	0	0	0	0	3.51651e-10	8.09677e-31	108.373	274.996	0.162197	0.0870906	0.789223	0.00692906	receptor-interacting serine-threonine kinase 4	NM_020639.2
HNRNPU	PH_hs_0031959	207	271	584	663	3.94444e-05	1.76639e-05	2.84057e-06	2.25514e-06	0	0	0	0	6.76718e-15	6.54019e-21	237.997	623.364	0.129859	0.10744	0.788622	0.000836139	heterogeneous nuclear ribonucleoprotein U (scaffold attachment factor A)	NM_004501.3,NM_031844.2
TNIP2	PH_hs_0032668	240	411	627	1143	2.51559e-05	5.97972e-06	2.50126e-06	1.17879e-06	0	0	0	0	1.02002e-07	3.54359e-06	322.043	884.066	0.192469	0.222665	0.788371	0.0694896	TNFAIP3 interacting protein 2	NM_024309.3,NM_001161527.1
PDPN	PH_hs_0033987	119	148	351	338	0.0011188	0.000116348	8.79042e-06	9.68655e-06	0	0	0	0	6.24805e-14	8.04123e-27	133.108	344.528	0.134927	0.0938304	0.787672	0.00238563	podoplanin	NM_001006625.1,NM_001006624.1,NM_198389.2,NM_006474.4
ATP1A1	PH_hs_0024197	9009	11504	22870	23158	3.423e-07	3.29512e-07	3.07662e-07	3.07311e-07	0	0	0	0	6.74754e-21	6.30584e-44	10219.7	23013.8	0.107478	0.0721987	0.787366	3.00523e-05	ATPase, Na+/K+ transporting, alpha 1 polypeptide	NM_001160234.1,NM_000701.7,NM_001160233.1
TMEM30A	PH_hs_0060969	522	860	1535	1971	3.54235e-06	1.49109e-06	7.88111e-07	6.80869e-07	0	0	0	0	7.61997e-09	4.74611e-14	684.285	1752.22	0.176715	0.134268	0.78669	0.0144529	transmembrane protein 30A	NM_001143958.1,NM_018247.3
FKRP	PH_hs_0032094	63	104	186	321	0.00281492	0.000378672	5.52361e-05	1.11167e-05	-50	0	0	0	1.44882e-06	2.69379e-06	82.6846	253.256	0.213769	0.219824	0.785907	0.0338501	fukutin related protein	NM_001039885.2,NM_024301.4
GABPB1	PH_hs_0044438	202	329	743	626	4.25631e-05	1.03913e-05	1.86377e-06	2.49731e-06	0	0	0	0	2.20743e-08	1.04649e-16	262.991	684.724	0.182702	0.121704	0.785612	0.0194852	GA binding protein transcription factor, beta subunit 1	NM_181427.3,NM_002041.4,NM_016655.4
MAGOH	PH_hs_0025145	664	807	1561	2269	4.24652e-06	1.63807e-06	7.50392e-07	5.64357e-07	0	0	0	0	3.29967e-23	6.41181e-10	733.759	1913.73	0.101484	0.164756	0.785485	0.00753389	mago-nashi homolog, proliferation-associated (Drosophila)	NM_002370.3
CSNK1E	PH_hs_0048056	86	124	222	235	0.000715765	0.43156	3.18634e-05	2.6824e-05	0	0	0	0	0.279301	1.10905e-23	104.313	228.479	1.70964	0.100374	0.785181	0.172404	casein kinase 1, epsilon	NM_152221.2,NM_001894.4
POT1	PH_hs_0047764	49	105	216	284	0.00681262	0.000367832	3.46066e-05	1.54747e-05	-50	0	0	0	0.000172622	3.45444e-11	75.7944	249.879	0.279427	0.153313	0.783154	0.00444237	protection of telomeres 1 homolog (S. pombe)	NR_003104.1,NR_003103.1,NR_003102.1,NM_015450.2,NM_001042594.1
RABGGTB	PH_hs_0004556	2293	2778	5816	6298	5.60592e-07	5.01112e-07	3.7656e-07	3.01267e-06	0	0	0	0	6.27588e-26	3.79944e-27	2529.7	6056.2	0.0955597	0.0932223	0.782369	6.94875e-05	Rab geranylgeranyltransferase, beta subunit	NR_073562.1,NM_004582.3
VMP1	PH_hs_0042305	576	617	1469	1583	2.91621e-06	2.64627e-06	7.93307e-07	7.41246e-07	0	0	0	0	7.3189e-32	1.00442e-28	596.958	1525.81	0.085556	0.0904336	0.782173	6.26847e-05	vacuole membrane protein 1	NM_030938.3
HSP90AA1	PH_hs_0043676	462	854	1542	1748	4.58624e-06	1.50897e-06	7.59316e-07	1.735e-06	0	0	0	0	5.42442e-07	6.04362e-22	649.856	1644.64	0.205104	0.104632	0.78195	0.0268125	heat shock protein 90kDa alpha (cytosolic), class A member 1	NM_005348.3,NM_001017963.2
MYEOV2	PH_hs_0046273	1303	3171	4107	6917	8.93489e-07	4.68818e-07	4.20456e-07	8.97599e-07	0	0	0	0	8.11348e-05	3.46182e-07	2195.96	5506.92	0.265147	0.201471	0.781786	0.116303	myeloma overexpressed 2	NM_001163424.1
EIF2S1	PH_hs_0009146	68	104	237	323	0.00150643	0.000379749	2.61133e-05	0.399655	-50	0	0	0	9.66954e-08	0.203698	85.3156	279.846	0.192102	1.20702	0.780507	0.164208	eukaryotic translation initiation factor 2, subunit 1 alpha, 35kDa	NM_004094.4
RNF6	PH_hs_0045162	143	148	322	418	0.000130418	0.000116359	0.00152002	5.75052e-06	0	0	0	0	3.88208e-19	2.50294e-10	145.736	369.829	0.112824	0.1608	0.780185	0.0216605	ring finger protein (C3H2C3 type) 6	NM_183043.2,NM_183044.2,NM_005977.3
GABARAPL2	PH_hs_0027060	2732	3298	6787	7440	5.05631e-07	4.60341e-07	3.62399e-07	3.55137e-07	0	0	0	0	1.57811e-26	1.55261e-27	3008.37	7112.4	0.0943875	0.0925116	0.780165	2.17891e-05	GABA(A) receptor-associated protein-like 2	NM_007285.6
ANXA2	PH_hs_0043919	271	401	799	929	1.76652e-05	6.44892e-06	1.66356e-06	3.36171e-06	0	0	0	0	7.41447e-11	6.06523e-19	333.592	863.773	0.156076	0.113462	0.779791	0.00527797	annexin A2	NM_004039.2,NM_001002857.1,NM_001002858.2,NM_001136015.2
ZNF710	PH_hs_0047367	658	799	1703	1991	2.42703e-06	1.66308e-06	6.96374e-07	6.17285e-07	0	0	0	0	1.07251e-23	6.71215e-20	726.792	1846.5	0.10034	0.110413	0.779772	0.000161027	zinc finger protein 710	NM_198526.2
LURAP1L	PH_hs_0061672	743	846	2177	1857	1.86361e-06	1.52698e-06	5.79886e-07	6.49812e-07	0	0	0	0	3.03773e-33	1.30822e-18	793.903	2017.61	0.0836434	0.114588	0.77971	0.00128932	leucine rich adaptor protein 1-like	NM_203403.1
SERTAD2	PH_hs_0004453	4356	5964	11594	11918	4.11582e-07	3.7407e-07	3.29158e-07	3.43503e-07	0	0	0	0	7.66056e-16	1.24418e-39	5132.7	11755.6	0.125402	0.0762123	0.779537	0.00028835	SERTA domain containing 2	NM_014755.2
POLR1D	PH_hs_0045151	667	945	2050	1978	2.2334e-06	1.30757e-06	6.05959e-07	8.23619e-07	0	0	0	0	2.48747e-13	6.35129e-33	801.067	2014.16	0.138389	0.0840754	0.779336	0.00129313	polymerase (RNA) I polypeptide D, 16kDa	NM_015972.3
ASPH	PH_hs_0044449	46	87	172	237	0.00478549	0.00176901	7.10531e-05	2.61136e-05	-50	0	0	0	6.28888e-05	1.35291e-09	65.6424	204.384	0.260785	0.168109	0.778765	0.0103591	aspartate beta-hydroxylase	NM_004318.3,NM_001164750.1
NUP35	PH_hs_0010686	789	1105	2163	2559	1.69554e-06	1.84056e-06	5.82397e-07	5.24489e-07	0	0	0	0	9.07764e-14	4.06697e-19	941.469	2360.31	0.135838	0.11289	0.778036	0.00145605	nucleoporin 35kDa	NM_138285.3
AFF3	PH_hs_0049129	95	153	293	334	0.000512078	0.000104282	1.41928e-05	9.9905e-06	0	0	0	0	1.3254e-07	1.33133e-18	122.861	313.429	0.194298	0.114614	0.777463	0.0272607	AF4/FMR2 family, member 3	NM_001025108.1,NM_002285.2
WASL	PH_hs_0043285	1253	1599	3339	3640	9.31756e-07	7.34603e-07	4.57738e-07	4.4092e-07	0	0	0	0	4.63425e-20	5.85088e-28	1420.91	3489	0.109924	0.0917547	0.777382	6.87389e-05	Wiskott-Aldrich syndrome-like	NM_003941.2
HMOX1	PH_hs_0011943	12992	15993	31969	31913	3.3211e-07	3.16967e-07	3.01494e-07	3.01522e-07	0	0	0	0	1.14549e-24	7.06254e-43	14453.6	31941.5	0.0981744	0.0731207	0.777158	1.40521e-05	heme oxygenase (decycling) 1	NM_002133.2
SLK	PH_hs_0005882	183	274	588	584	5.82199e-05	1.71262e-05	2.8044e-06	2.84042e-06	0	0	0	0	5.47254e-10	5.7485e-35	226.797	586.015	0.164069	0.0814285	0.776959	0.006661	STE20-like kinase	NM_014720.2
ZNF655	PH_hs_0046163	422	442	1075	1149	5.62465e-06	5.06706e-06	1.10893e-06	0.000175446	0	0	0	0	6.53544e-27	1.6622e-22	432.573	1111.88	0.0936611	0.103199	0.776568	0.002795	zinc finger protein 655	NM_024061.3,NM_001085366.1,NM_001009958.1,NM_001085367.1
DIAPH1	PH_hs_0047246	2005	2724	5091	6209	6.13851e-07	5.06439e-07	3.91119e-07	3.70238e-07	0	0	0	0	4.67527e-16	2.85441e-17	2352.44	5648.03	0.124454	0.119459	0.775639	0.00159476	diaphanous homolog 1 (Drosophila)	NM_005219.4,NM_001079812.2
SERP1	PH_hs_0025770	2438	2540	5496	6428	5.39723e-07	5.31048e-07	3.82473e-07	3.67087e-07	0	0	0	0	8.99435e-31	2.10244e-20	2492.63	5960.37	0.0871597	0.108901	0.775502	0.000456925	stress-associated endoplasmic reticulum protein 1	NM_014445.3
EIF6	PH_hs_0044101	3380	4467	8437	9720	4.5524e-07	4.07995e-07	3.46383e-07	3.37941e-07	0	0	0	0	5.55485e-18	7.3833e-22	3906.13	9076.27	0.116798	0.10486	0.77528	0.000471546	eukaryotic translation initiation factor 6	NM_001267810.1,NM_181468.2,NM_002212.3,NR_052023.1
OR10G8|OR10G7|OR10G4|OR10G9	PH_hs_0062064	98	91	172	242	0.000461671	0.000595093	0.432254	2.45602e-05	0	0	0	0	2.00285e-11	0.222181	94.9092	206.874	0.151426	1.30745	0.773704	0.00451581	olfactory receptor, family 10, subfamily G, member 8|olfactory receptor, family 10, subfamily G, member 7|olfactory receptor, family 10, subfamily G, member 4|olfactory receptor, family 10, subfamily G, member 9	NM_001004464.1|NM_001004463.1|NM_001004462.1|NM_001001953.1
TNFRSF10D	PH_hs_0047958	1744	1905	4482	4354	6.82817e-07	6.37333e-07	4.07535e-07	4.11648e-07	0	0	0	0	6.45346e-40	1.72583e-35	1825.01	4418.29	0.075925	0.0807906	0.773666	7.69635e-05	tumor necrosis factor receptor superfamily, member 10d, decoy with truncated death domain	NM_003840.4
RAB31	PH_hs_0012499	358	537	1066	1187	8.36792e-06	3.39825e-06	0.000180581	9.87878e-07	0	0	0	0	8.59786e-11	1.51257e-19	444.146	1126.29	0.156629	0.11151	0.773525	0.0162171	RAB31, member RAS oncogene family	NM_006868.3
WARS	PH_hs_0048306	941	1107	2591	2510	1.65449e-06	1.10461e-06	5.25755e-07	6.45572e-07	0	0	0	0	2.36119e-28	4.09191e-34	1022.4	2550.68	0.0910673	0.082502	0.773506	3.81734e-05	tryptophanyl-tRNA synthetase	NM_213646.1,NM_213645.1,NM_173701.1,NM_004184.3
FBXW7	PH_hs_0047769	220	337	642	788	3.26942e-05	9.76045e-06	2.38664e-06	1.69973e-06	0	0	0	0	1.04051e-09	1.14668e-15	276.273	714.742	0.166907	0.126193	0.773416	0.00983329	F-box and WD repeat domain containing 7, E3 ubiquitin protein ligase	NM_001013415.1,NM_033632.3,NM_018315.4
MGC21881	PH_hs_0044960	151	210	407	528	0.000108867	3.77154e-05	6.11855e-06	3.46262e-06	0	0	0	0	1.19798e-11	1.34713e-12	179.476	467.285	0.14971	0.143004	0.773359	0.00970955	uncharacterized locus MGC21881	NR_015363.1
NBAS	PH_hs_0024958	498	869	1458	1876	3.90582e-06	0.000259195	7.9895e-07	6.44983e-07	0	0	0	0	1.02799e-06	5.68641e-14	675.943	1666.26	0.210622	0.1347	0.772234	0.0266813	neuroblastoma amplified sequence	NM_015909.3,NR_052013.2
CHSY1	PH_hs_0029086	440	792	1485	1573	5.11232e-06	1.68608e-06	7.85312e-07	7.45289e-07	0	0	0	0	2.53948e-07	1.80248e-31	608.749	1528.86	0.199072	0.086122	0.772163	0.0204535	chondroitin sulfate synthase 1	NM_014918.4
COMMD5	PH_hs_0043877	142	267	432	467	0.000133376	0.0408552	5.32943e-06	4.4797e-06	0	0	0	0	0.00082614	6.27432e-25	201.89	449.442	0.317812	0.0976149	0.771966	0.101824	COMM domain containing 5	NM_001081004.1,NM_001081003.1,NM_014066.3
H1FX	PH_hs_0004307	304	383	864	895	1.52632e-05	7.07622e-06	1.49842e-06	1.40883e-06	0	0	0	0	3.10713e-18	4.64181e-34	342.382	879.455	0.115895	0.0825724	0.771665	0.000134003	H1 histone family, member X	NM_006026.3
BTN2A1	PH_hs_0010142	343	491	1171	962	9.32583e-06	4.47813e-06	1.00299e-06	1.27722e-06	0	0	0	0	3.50152e-12	9.83419e-16	414.344	1066.9	0.145824	0.12589	0.771099	0.00851118	butyrophilin, subfamily 2, member A1	NM_001197233.1,NM_078476.2,NM_007049.3
SKP1	PH_hs_0060031	103	118	272	286	0.433163	0.000248078	1.75098e-05	1.52008e-05	0	0	0	0	0.248038	8.53148e-26	110.4	278.978	1.46912	0.0958263	0.770626	0.15721	S-phase kinase-associated protein 1	NM_006930.3
H1F0	PH_hs_0012629	721	1018	2120	2190	1.96148e-06	1.18817e-06	5.90342e-07	1.00824e-06	0	0	0	0	1.54241e-13	3.08934e-36	864.25	2154.9	0.137162	0.0799039	0.770605	0.00106231	H1 histone family, member 0	NM_005318.3
PELO	PH_hs_0025010	1089	2198	3527	4294	1.09172e-06	5.76171e-07	4.46831e-07	4.14219e-07	0	0	0	0	3.48405e-06	2.69509e-17	1619.92	3909.15	0.222486	0.119362	0.770307	0.0410109	pelota homolog (Drosophila)	NM_015946.4
NR4A3	PH_hs_0061169	290	300	748	777	1.46294e-05	1.33222e-05	1.84371e-06	1.73654e-06	0	0	0	0	1.80502e-23	5.31073e-33	295.483	762.457	0.100865	0.0839699	0.768914	0.000290116	nuclear receptor subfamily 4, group A, member 3	NM_173200.2,NM_006981.3
LRRN3	PH_hs_0060964	220	229	558	605	3.27019e-05	2.8953e-05	3.10257e-06	2.65959e-06	0	0	0	0	1.62036e-22	1.5685e-25	224.833	581.422	0.103171	0.0963618	0.768227	0.000319084	leucine rich repeat neuronal 3	NM_001099660.1,NM_018334.4,NM_001099658.1
CCT5	PH_hs_0000217	3345	4785	7911	11074	4.57503e-07	3.98781e-07	3.50702e-07	3.31281e-07	0	0	0	0	1.23951e-13	3.77022e-11	4039.17	9486.83	0.136611	0.153622	0.767686	0.0109755	chaperonin containing TCP1, subunit 5 (epsilon)	NM_012073.3
DAGLB	PH_hs_0007851	190	275	586	666	0.110094	0.00078319	2.82286e-06	2.23751e-06	0	0	0	0	8.10744e-05	8.01126e-21	230.957	625.862	0.265133	0.107689	0.767278	0.0651853	diacylglycerol lipase, beta	NM_139179.3,NM_001142936.1
SLC38A2	PH_hs_0015407	6541	7310	15103	16157	3.76079e-07	3.56466e-07	3.18835e-07	3.16647e-07	0	0	0	0	1.28247e-41	1.61453e-31	6923.51	15628.3	0.0742749	0.0860522	0.767004	1.83295e-05	solute carrier family 38, member 2	NM_018976.4
TGIF2-C20orf24|C20orf24	PH_hs_0044203	5899	9795	15678	19227	7.71202e-07	3.37519e-07	3.17603e-07	3.11686e-07	0	0	0	0	4.3907e-09	4.75105e-17	7769.3	17446.2	0.173831	0.120325	0.766995	0.0127916	TGIF2-C20orf24 readthrough|chromosome 20 open reading frame 24	NM_001199535.1|NM_199483.2,NR_026562.3,NM_001199534.1,NM_018840.4
PIP5K1A|PIP5K1P1	PH_hs_0035303	763	959	2096	2183	1.90088e-06	1.28215e-06	5.95001e-07	5.78802e-07	0	0	0	0	1.13634e-20	3.04515e-35	858.249	2139.37	0.108123	0.0810897	0.766818	3.98691e-05	phosphatidylinositol-4-phosphate 5-kinase, type I, alpha|phosphatidylinositol-4-phosphate 5-kinase, type I, pseudogene 1	NM_001135638.1,NM_001135637.1,NM_001135636.1,NM_003557.2|NR_027712.1
SLC22A4	PH_hs_0021042	756	775	1911	1930	1.81269e-06	1.74307e-06	6.3586e-07	6.3117e-07	0	0	0	0	3.30918e-26	2.48871e-42	766.926	1920.49	0.0950109	0.0736155	0.765304	0.000337501	solute carrier family 22 (organic cation/ergothioneine transporter), member 4	NM_003059.2
IL1R1	PH_hs_0004694	3313	3731	7980	8343	5.14809e-07	4.36651e-07	3.5039e-07	3.47112e-07	0	0	0	0	6.17696e-39	1.08897e-35	3520.32	8160.95	0.0769275	0.0805504	0.765161	4.98673e-06	interleukin 1 receptor, type I	NM_000877.2
HMGN4	PH_hs_0012847	73	100	187	240	0.00673499	0.000431036	5.43043e-05	2.51562e-05	0	0	0	0	7.03527e-09	1.19655e-11	86.0413	213.406	0.176288	0.149706	0.764482	0.0244798	high mobility group nucleosomal binding domain 4	NM_006353.2
C1orf106	PH_hs_0027146	85	98	235	215	0.000744139	0.00046099	2.67817e-05	3.62449e-05	0	0	0	0	3.14872e-17	2.86148e-19	91.4029	225.04	0.119624	0.112394	0.76356	0.00320209	chromosome 1 open reading frame 106	NM_018265.3,NM_001142569.2
CCDC28A	PH_hs_0048143	351	556	1255	1310	0.280063	3.2905e-06	9.29231e-07	8.88302e-07	0	0	0	0	0.012757	9.49621e-34	449.513	1282.42	0.447722	0.0829756	0.763351	0.0822865	coiled-coil domain containing 28A	NM_015439.2
ATP5A1	PH_hs_0045345	115	152	328	346	0.000269917	0.000106425	0.0241015	9.13919e-06	0	0	0	0	1.5421e-12	9.07525e-12	132.909	336.972	0.143393	0.148806	0.762739	0.0759188	ATP synthase, H+ transporting, mitochondrial F1 complex, alpha subunit 1, cardiac muscle	NM_004046.5,NM_001257335.1,NM_001001935.2,NM_001257334.1,NM_001001937.1
TARS	PH_hs_0042066	472	474	1035	1404	4.38163e-06	4.33704e-06	1.16202e-06	8.28449e-07	0	0	0	0	2.04819e-22	9.14494e-12	474.124	1218.84	0.103427	0.14883	0.762351	0.00649187	threonyl-tRNA synthetase	NM_001258438.1,NM_001258437.1,NM_152295.4,NR_047678.1,NR_047677.1,NR_047676.1
OPTN	PH_hs_0024518	495	650	1347	1516	3.95609e-06	5.27963e-05	1.52073e-06	7.70473e-07	0	0	0	0	6.61939e-15	7.49565e-23	570.055	1431.21	0.129811	0.102343	0.761329	0.000731891	optineurin	NM_001008213.1,NM_001008212.1,NM_021980.4,NM_001008211.1
CDK17	PH_hs_0040841	148	186	423	411	0.000116233	5.52254e-05	5.59238e-06	0.0411141	0	0	0	0	9.68828e-16	3.12018e-10	166.467	417.028	0.125861	0.161701	0.761073	0.0720987	cyclin-dependent kinase 17	NM_002595.4,NM_001170464.2
PAIP1	PH_hs_0049637	225	375	668	855	3.0539e-05	7.45193e-06	2.25124e-06	1.50461e-06	0	0	0	0	4.30896e-08	1.12065e-13	297.003	761.168	0.186787	0.13636	0.761015	0.022523	poly(A) binding protein interacting protein 1	NM_183323.2,NM_182789.3,NM_006451.4
OR2T1	PH_hs_0042608	406	593	1080	1486	0.00109164	2.76605e-06	1.10301e-06	7.84793e-07	0	0	0	0	4.79986e-10	2.51133e-11	496.076	1282.27	0.163508	0.152201	0.760776	0.0230798	olfactory receptor, family 2, subfamily T, member 1	NM_030904.1
SEH1L	PH_hs_0015504	54	100	221	244	0.00641541	0.000431076	3.22496e-05	2.39523e-05	-50	0	0	0	2.51249e-05	8.01789e-20	76.0438	232.461	0.246642	0.110651	0.760711	0.000395549	SEH1-like (S. cerevisiae)	NM_001013437.1,NM_031216.3
DDX20	PH_hs_0004017	127	143	325	360	0.000193596	0.000130309	1.07448e-05	8.33307e-06	0	0	0	0	1.354e-22	2.83087e-21	134.936	342.44	0.102977	0.106427	0.760698	0.000255392	DEAD (Asp-Glu-Ala-Asp) box polypeptide 20	NM_007204.4
LRP11	PH_hs_0024747	151	219	528	421	0.000109297	3.31737e-05	3.46092e-06	5.6561e-06	0	0	0	0	1.91812e-10	2.21586e-13	183.763	474.703	0.15973	0.13809	0.760468	0.0203778	low density lipoprotein receptor-related protein 11	NM_032832.5
S100PBP	PH_hs_0044131	82	150	231	283	0.000831481	0.0327425	2.82011e-05	1.56558e-05	0	0	0	0	0.00048272	7.17313e-14	114.592	256.908	0.302993	0.135262	0.758936	0.119979	S100P binding protein	NM_022753.3,NM_001256121.1
LGALS1	PH_hs_0024712	16070	24085	42866	41833	3.16816e-07	3.06495e-07	2.98026e-07	2.97939e-07	0	0	0	0	5.8441e-12	3.05494e-37	19927.4	42352	0.147405	0.0787561	0.758346	0.00286582	lectin, galactoside-binding, soluble, 1	NM_002305.3
SCRN1	PH_hs_0004278	1149	2047	3627	3925	1.02496e-06	6.04858e-07	4.42897e-07	4.27746e-07	0	0	0	0	1.02842e-07	4.31124e-29	1579.57	3775.5	0.192525	0.0898194	0.757854	0.0174071	secernin 1	NM_001145513.1,NM_001145515.1,NM_001145514.1,NM_014766.4
DDT	PH_hs_0043686	2253	3946	6169	8151	5.66936e-07	4.2686e-07	3.71119e-07	3.48747e-07	0	0	0	0	4.5225e-08	3.60577e-13	3064.97	7156.46	0.187093	0.139366	0.757342	0.025822	D-dopachrome tautomerase	NM_001084392.1,NM_001355.3
AKAP8L	PH_hs_0031425	1083	1284	2728	3064	1.09903e-06	9.06964e-07	5.06051e-07	4.76613e-07	0	0	0	0	8.62629e-28	4.58585e-24	1181.42	2895.42	0.0920536	0.0995009	0.757106	5.80626e-05	A kinase (PRKA) anchor protein 8-like	NM_014371.2
SUV420H1	PH_hs_0021127	173	328	573	668	6.97179e-05	1.10077e-05	0.0008129	2.22763e-06	0	0	0	0	2.90586e-06	8.68792e-15	247.256	620.334	0.220598	0.1304	0.756264	0.0875376	suppressor of variegation 4-20 homolog 1 (Drosophila)	NM_017635.3
CTSO	PH_hs_0047524	91	96	216	243	0.000590521	0.000493553	3.45781e-05	2.42551e-05	0	0	0	0	3.42097e-17	2.49764e-18	93.6074	229.454	0.119764	0.11556	0.755916	0.00126897	cathepsin O	NM_001334.2
SNIP1	PH_hs_0005560	460	597	1311	1335	4.63026e-06	2.72507e-06	8.87513e-07	8.7115e-07	0	0	0	0	2.21821e-17	3.55277e-39	526.395	1322.97	0.119037	0.0766784	0.755547	0.000308766	Smad nuclear interacting protein 1	NM_024700.3
SNRPA1	PH_hs_0044153	1729	3558	5667	6623	6.87639e-07	4.61098e-07	3.79232e-07	0.000117071	0	0	0	0	4.91756e-06	3.26499e-16	2604.44	6143.33	0.226205	0.123778	0.754638	0.0770775	small nuclear ribonucleoprotein polypeptide A'	NM_003090.2
YPEL2	PH_hs_0047712	288	298	759	741	1.48871e-05	1.35489e-05	1.80182e-06	1.87164e-06	0	0	0	0	1.84187e-23	8.06068e-33	293.478	750.043	0.100886	0.0842164	0.754507	0.000634591	yippee-like 2 (Drosophila)	NM_001005404.3
LARP4	PH_hs_0048856	462	782	1294	1827	4.58964e-06	1.72006e-06	9.0424e-07	6.5805e-07	0	0	0	0	2.74377e-08	1.24796e-10	615.562	1559.54	0.184001	0.158047	0.752641	0.0328964	La ribonucleoprotein domain family, member 4	NM_001170808.1,NM_001170803.1,NM_199190.2,NM_199188.2,NM_052879.4
HBP1	PH_hs_0025623	121	158	338	365	0.000227984	9.38133e-05	9.68999e-06	7.96775e-06	0	0	0	0	3.56195e-13	5.85836e-24	138.923	351.455	0.139333	0.0997407	0.752538	0.00308189	HMG-box transcription factor 1	NM_001244262.1,NM_012257.3
PPAPDC1B	PH_hs_0048540	265	414	731	994	1.88595e-05	5.87896e-06	1.91329e-06	1.22335e-06	0	0	0	0	1.78323e-09	1.67867e-11	336.626	862.03	0.169401	0.15083	0.75212	0.0195901	phosphatidic acid phosphatase type 2 domain containing 1B	NM_001102559.1
C1orf109	PH_hs_0042001	570	760	1574	1723	2.97519e-06	1.79788e-06	7.58101e-07	6.96945e-07	0	0	0	0	4.19926e-16	1.27397e-26	661.912	1648.25	0.124251	0.0942096	0.75207	0.00052129	chromosome 1 open reading frame 109	NM_017850.1
CCBE1	PH_hs_0061391	289	330	767	807	1.47412e-05	2.27245e-05	1.7722e-06	1.63966e-06	0	0	0	0	9.69339e-27	7.16651e-31	309.246	786.937	0.0939839	0.0870107	0.751478	2.01212e-05	collagen and calcium binding EGF domains 1	NM_133459.3
CASP3	PH_hs_0022563	2019	2302	4852	5357	6.10833e-07	5.59842e-07	3.97002e-07	3.85264e-07	0	0	0	0	1.27955e-35	1.91359e-26	2158.8	5103.64	0.0806343	0.0945486	0.751095	3.47726e-05	caspase 3, apoptosis-related cysteine peptidase	NM_032991.2,NM_004346.3
FOXL1	PH_hs_0047667	88	139	268	291	0.000658611	0.000143471	1.82375e-05	1.44675e-05	0	0	0	0	9.26741e-08	3.01691e-22	112.51	279.462	0.191811	0.103853	0.751094	0.0284463	forkhead box L1	NM_005250.2
SETD5	PH_hs_0033141	231	443	818	848	2.82507e-05	5.03789e-06	1.60505e-06	1.52182e-06	0	0	0	0	2.60274e-06	1.00505e-33	332.549	832.956	0.219475	0.0830079	0.751014	0.039705	SET domain containing 5	NM_001080517.1
SERTAD1	PH_hs_0023332	1302	1555	3322	3563	1.01273e-06	7.60069e-07	4.58789e-07	4.44903e-07	0	0	0	0	5.21181e-27	1.99426e-30	1425.74	3442.1	0.0934773	0.0876877	0.750717	1.17744e-05	SERTA domain containing 1	NM_013376.3
MIR17HG	PH_hs_0002127	350	325	814	920	8.85983e-06	0.000221348	1.61738e-06	1.35607e-06	0	0	0	0	4.31632e-14	5.30138e-22	338.961	866.817	0.134043	0.104484	0.750516	0.00549707	miR-17-92 cluster host gene (non-protein coding)	NR_027350.1,NR_027349.1
PID1	PH_hs_0019814	12116	13713	28191	28118	3.27227e-07	3.22327e-07	3.03543e-07	3.03577e-07	0	0	0	0	9.25229e-39	1.26677e-42	12906.7	28155	0.077111	0.0733493	0.750455	1.0112e-05	phosphotyrosine interaction domain containing 1	NM_001100818.1,NM_017933.4
SUPV3L1	PH_hs_0005923	654	903	2027	1809	2.3097e-06	1.39141e-06	6.09081e-07	6.63157e-07	0	0	0	0	1.87762e-14	1.89979e-22	774.222	1918.43	0.132114	0.103345	0.750441	0.00300356	suppressor of var1, 3-like 1 (S. cerevisiae)	NM_003171.3
DDX21	PH_hs_0032217	1865	2201	4758	4844	6.47676e-07	2.83461e-06	4.04517e-07	3.97211e-07	0	0	0	0	1.0664e-27	1.32731e-41	2029.67	4800.91	0.0922181	0.074289	0.749418	8.24125e-06	DEAD (Asp-Glu-Ala-Asp) box helicase 21	NM_001256910.1,NM_004728.3
TUBE1	PH_hs_0031153	79	102	209	230	0.00102604	0.000404217	0.000103927	2.86616e-05	0	0	0	0	8.87986e-12	6.3058e-19	90.151	219.464	0.148735	0.113519	0.74931	0.00774405	tubulin, epsilon 1	NM_016262.4
RAB5A	PH_hs_0004227	89	108	216	266	0.000635981	0.00033386	3.45888e-05	1.87473e-05	0	0	0	0	7.76531e-15	1.76409e-13	98.2706	240.912	0.130156	0.137504	0.748885	0.00516425	RAB5A, member RAS oncogene family	NM_004162.4
ZMYM5	PH_hs_0028328	234	295	653	688	2.71296e-05	1.70653e-05	2.31694e-06	2.11612e-06	0	0	0	0	2.86205e-17	4.61705e-30	263.635	670.445	0.119463	0.0882549	0.748673	0.000314453	zinc finger, MYM-type 5	NM_001039649.2,NM_001039650.2
IFIT1	PH_hs_0043622	423	488	1101	1183	5.59339e-06	4.08093e-06	1.07769e-06	9.91489e-07	0	0	0	0	1.43647e-28	1.31971e-28	455.009	1141.87	0.0906972	0.0906346	0.747493	1.82748e-05	interferon-induced protein with tetratricopeptide repeats 1	NM_001270930.1,NM_001270929.1,NM_001270928.1,NM_001270927.1,NM_001548.4
MUL1	PH_hs_0001043	632	738	1672	1736	2.76997e-06	0.0216736	0.124145	7.0522e-07	0	0	0	0	2.25152e-11	5.38702e-06	684.056	1703.91	0.151826	0.22722	0.746471	0.000848969	mitochondrial E3 ubiquitin protein ligase 1	NM_024544.2
TMPPE	PH_hs_0038854	117	91	251	259	0.000616718	0.000590344	2.20686e-05	2.02246e-05	0	0	0	0	2.13405e-07	1.27088e-27	104.907	254.989	0.197762	0.0923548	0.745382	0.0318513	transmembrane protein with metallophosphoesterase domain	NM_001136238.1,NM_001039770.2
COPA	PH_hs_0031935	789	1104	2184	2698	1.69606e-06	1.07404e-06	1.3301e-06	0.0215388	0	0	0	0	5.25489e-14	1.48962e-07	940.993	2440.09	0.134511	0.195131	0.745203	0.0694977	coatomer protein complex, subunit alpha	NM_001098398.1,NM_004371.3
ETV4	PH_hs_0025305	387	452	1049	1052	6.90058e-06	4.81385e-06	1.14274e-06	1.18681e-06	0	0	0	0	1.84137e-26	7.3868e-40	418.92	1050.51	0.0945164	0.0759839	0.744252	4.41473e-05	ets variant 4	NM_001261439.1,NM_001261438.1,NM_001261437.1,NM_001079675.2,NM_001986.2
CCDC86	PH_hs_0000470	671	890	1867	1958	2.20874e-06	1.41995e-06	6.47184e-07	6.24534e-07	0	0	0	0	1.25737e-16	1.105e-33	776.975	1912.36	0.122032	0.0830618	0.744241	0.000348405	coiled-coil domain containing 86	NM_024098.3
AAGAB	PH_hs_0023264	80	132	229	291	0.000943356	0.000170291	2.93555e-05	1.44821e-05	0	0	0	0	5.08885e-07	2.0877e-12	104.966	259.89	0.204575	0.144277	0.744205	0.0487948	alpha- and gamma-adaptin binding protein	NM_001271886.1,NM_001271885.1,NM_024666.4
KRTAP20-2	PH_hs_0030515	134	245	458	517	0.000161947	2.3676e-05	4.6748e-06	0.377534	0	0	0	0	1.86213e-06	0.127102	187.202	487.398	0.21616	0.87704	0.744159	0.0458487	keratin associated protein 20-2	NM_181616.1
PPP6C	PH_hs_0017306	379	720	1044	1759	7.27385e-06	1.96483e-06	1.14955e-06	6.7828e-07	0	0	0	0	1.31559e-06	3.58103e-07	542.359	1400.21	0.21287	0.201738	0.744092	0.0833549	protein phosphatase 6, catalytic subunit	NM_001123369.1,NM_001123355.1,NM_002721.4
TMEM79	PH_hs_0016738	152	196	411	469	0.000106467	4.68026e-05	5.98507e-06	4.44124e-06	0	0	0	0	1.42591e-14	1.37621e-19	173.334	439.9	0.131495	0.111381	0.742995	0.00228663	transmembrane protein 79	NR_026678.1,NM_032323.2
BEST1	PH_hs_0022792	155	167	394	425	9.97803e-05	7.81589e-05	6.60767e-06	5.53203e-06	0	0	0	0	1.34962e-23	8.6866e-25	161.1	409.449	0.100571	0.0979161	0.742975	0.000257499	bestrophin 1	NM_004183.3
CCNC	PH_hs_0025404	165	258	460	611	8.13247e-05	2.03427e-05	4.63356e-06	2.62389e-06	0	0	0	0	6.73039e-09	6.70762e-12	209.705	535.23	0.176053	0.14784	0.742802	0.025873	cyclin C	NM_001013399.1,NM_005190.3
ADIPOR2	PH_hs_0016487	464	746	1285	1346	4.54589e-06	0.10021	9.0623e-07	8.63922e-07	0	0	0	0	0.00117381	3.75312e-33	599.468	1315.41	0.328697	0.0837666	0.742664	0.0768362	adiponectin receptor 2	NM_024551.2
PDRG1	PH_hs_0001936	14226	14470	31575	30599	3.20916e-07	1.15044e-06	3.01716e-07	3.02174e-07	0	0	0	0	5.30079e-27	1.08235e-35	14377.5	31089.2	0.093491	0.0805472	0.741493	0.000514446	p53 and DNA-damage regulated 1	NM_030815.2
RNF187	PH_hs_0048251	167	127	372	373	7.84e-05	0.000194292	7.67513e-06	7.63905e-06	0	0	0	0	6.5051e-08	8.68457e-34	148.363	372.503	0.189441	0.082925	0.740825	0.0375377	ring finger protein 187	NM_001010858.2
ATP2B4	PH_hs_0032741	331	612	995	1197	1.02291e-05	0.00193345	1.22191e-06	9.78557e-07	0	0	0	0	1.91723e-05	2.37995e-17	465.662	1095.64	0.242881	0.119154	0.740821	0.0529039	ATPase, Ca++ transporting, plasma membrane 4	NM_001684.4,NM_001001396.2
HLX	PH_hs_0004263	571	644	1514	1499	2.96541e-06	2.37719e-06	7.71418e-07	7.78513e-07	0	0	0	0	7.51579e-34	5.19299e-38	607.187	1506.55	0.0828433	0.0779095	0.74064	6.57171e-05	H2.0-like homeobox	NM_021958.3
INPP4A	PH_hs_0032716	101	96	226	254	0.000421226	0.000494804	3.0153e-05	2.13103e-05	0	0	0	0	2.13593e-12	1.35276e-18	98.8692	239.952	0.144344	0.114637	0.740627	0.00611513	inositol polyphosphate-4-phosphatase, type I, 107kDa	NM_001566.2
SF1	PH_hs_0025808	255	307	630	802	2.20438e-05	1.53116e-05	2.49837e-06	1.65367e-06	0	0	0	0	5.24684e-21	7.41064e-14	280.401	715.694	0.10717	0.135341	0.740006	0.00264117	splicing factor 1	NR_033650.1,NR_033649.1,NM_001178031.1,NM_001178030.1,NM_201998.2,NM_201995.2,NM_004630.3,NM_201997.2
KIAA1609	PH_hs_0001368	47	82	187	184	0.00451006	0.000836309	5.4352e-05	5.72295e-05	-50	0	0	0	1.02416e-05	4.84901e-25	63.7871	185.508	0.234766	0.0973783	0.739962	0.00191356	KIAA1609	NM_020947.3
ZBTB8OS	PH_hs_0024843	102	133	246	337	0.000404848	0.000165812	2.33882e-05	9.78092e-06	0	0	0	0	1.44445e-12	2.9512e-10	117.018	291.337	0.143204	0.161472	0.739841	0.0180895	zinc finger and BTB domain containing 8 opposite strand	NM_178547.2
RORA	PH_hs_0002958	345	378	875	943	9.18709e-06	7.32081e-06	1.45456e-06	2.3033e-06	0	0	0	0	6.90298e-33	4.44629e-27	361.574	908.888	0.0841246	0.0933489	0.73966	0.000133243	RAR-related orphan receptor A	NM_134262.2,NM_002943.3,NM_134260.2,NM_134261.2
PTGER1	PH_hs_0042491	170	219	467	513	7.39657e-05	6.55571e-05	4.48633e-06	3.6728e-06	0	0	0	0	1.34885e-14	1.90718e-23	193.761	489.922	0.131371	0.100921	0.739629	0.00128383	prostaglandin E receptor 1 (subtype EP1), 42kDa	NM_000955.2
IRF1	PH_hs_0004638	391	464	1079	1054	6.73751e-06	4.54588e-06	1.10498e-06	1.13983e-06	0	0	0	0	1.36198e-24	3.70205e-34	426.74	1066.56	0.0983371	0.0824462	0.739481	0.000135502	interferon regulatory factor 1	NM_002198.2
MARCH7	PH_hs_0030920	686	1017	2038	2086	2.12751e-06	1.18884e-06	6.06824e-07	5.9705e-07	0	0	0	0	1.1045e-11	4.77611e-39	845.358	2061.94	0.149443	0.0768113	0.739291	0.00322782	membrane-associated ring finger (C3HC4) 7, E3 ubiquitin protein ligase	NM_022826.2
BYSL	PH_hs_0005945	835	1185	2364	2506	1.55667e-06	1.02185e-06	5.49937e-07	5.32414e-07	0	0	0	0	2.00895e-13	4.65991e-32	1003.78	2434.77	0.137837	0.0852767	0.738881	0.00142662	bystin-like	NM_004053.3
KLHL18	PH_hs_0037886	207	283	606	662	0.0686268	0.00111141	2.65142e-06	2.26181e-06	0	0	0	0	6.05196e-06	6.68928e-25	243.713	633.906	0.228534	0.097674	0.73885	0.0457148	kelch-like 18 (Drosophila)	NM_025010.4
C3orf38	PH_hs_0019245	160	228	405	587	8.99235e-05	2.93205e-05	6.19016e-06	2.82953e-06	0	0	0	0	4.77397e-11	2.07047e-09	192.785	495.673	0.154465	0.170113	0.73836	0.0272655	chromosome 3 open reading frame 38	NM_173824.3
SEMA4C	PH_hs_0000736	516	890	1619	1786	3.62686e-06	1.42065e-06	7.26712e-07	6.69946e-07	0	0	0	0	5.11122e-08	1.06975e-25	695.417	1702.22	0.187874	0.0960242	0.738345	0.0190222	sema domain, immunoglobulin domain (Ig), transmembrane domain (TM) and short cytoplasmic domain, (semaphorin) 4C	NM_017789.4
NGRN	PH_hs_0031613	1115	1744	3694	2962	1.06158e-06	6.8285e-07	4.38243e-07	9.78781e-05	0	0	0	0	2.50731e-10	3.05517e-13	1417.36	3329.39	0.160807	0.138928	0.73796	0.0324097	neugrin, neurite outgrowth associated	NM_001033088.1,NR_028052.1
CD59	PH_hs_0048593	542	749	1546	1686	3.28394e-06	1.83966e-06	7.64369e-07	0.37012	0	0	0	0	3.28944e-14	0.107185	641.939	1615.77	0.133404	0.805389	0.737896	0.00108747	CD59 molecule, complement regulatory protein	NM_001127227.1,NM_001127226.1,NM_000611.5,NM_203331.2,NM_001127225.1,NM_203329.2,NM_203330.2,NM_001127223.1
LRRC57	PH_hs_0025612	57	80	179	181	0.0025844	0.00124044	6.2462e-05	6.51453e-05	-50	0	0	0	1.65412e-08	3.84248e-27	68.0964	179.999	0.181019	0.0932314	0.737357	0.00158418	leucine rich repeat containing 57	NM_153260.2
TNFAIP6	PH_hs_0024700	315	373	858	865	1.16605e-05	7.55169e-06	1.49615e-06	1.47866e-06	0	0	0	0	7.41275e-24	5.61474e-40	343.407	861.499	0.0999727	0.0758645	0.736462	7.75357e-05	tumor necrosis factor, alpha-induced protein 6	NM_007115.3
ZNF473	PH_hs_0033458	259	293	683	711	2.0134e-05	1.42034e-05	2.14254e-06	2.00279e-06	0	0	0	0	2.85798e-28	3.01097e-32	275.837	696.958	0.0912107	0.0850091	0.736278	4.05942e-05	zinc finger protein 473	NM_001006656.1,NM_015428.1
THUMPD2	PH_hs_0024073	187	265	494	650	5.43058e-05	1.88281e-05	3.97091e-06	2.43913e-06	0	0	0	0	1.53679e-11	2.75176e-12	224.615	571.722	0.150534	0.145097	0.735987	0.0137668	THUMP domain containing 2	NM_025264.4,NR_028102.1
HIPK2	PH_hs_0024580	1429	1462	3236	3723	8.14388e-07	7.96942e-07	4.64537e-07	7.17053e-07	0	0	0	0	2.68698e-27	2.18592e-21	1448.27	3478.65	0.0929453	0.10612	0.735925	0.00116641	homeodomain interacting protein kinase 2	NM_022740.4,NM_001113239.2
BRK1	PH_hs_0037792	1435	2288	4099	4551	8.112e-07	9.09401e-07	4.20815e-07	4.05417e-07	0	0	0	0	8.2849e-10	1.17456e-25	1844.84	4324.23	0.165884	0.0961064	0.735142	0.00800744	BRICK1, SCAR/WAVE actin-nucleating complex subunit	NM_018462.4
DMWD	PH_hs_0014210	121	158	346	348	0.000227984	9.3799e-05	9.12051e-06	8.98825e-06	0	0	0	0	3.56121e-13	7.77704e-34	138.923	347.001	0.139333	0.0828626	0.734578	0.00412966	dystrophia myotonica, WD repeat containing	NM_004943.1
CCNT2	PH_hs_0023546	153	238	440	536	0.000104673	2.57869e-05	5.11215e-06	3.35779e-06	0	0	0	0	6.81663e-09	1.63242e-15	193.865	487.831	0.17612	0.126898	0.73343	0.0210823	cyclin T2	NM_058241.2,NM_001241.3,NR_037649.1
CCL3L1|CCL3L3|CCL3|LOC101060267	PH_hs_0062239	1383	1822	3517	4056	8.43676e-07	6.59443e-07	4.47384e-07	4.22411e-07	0	0	0	0	9.17271e-18	1.65025e-21	1595.53	3785.56	0.117594	0.105789	0.73235	0.00076417	chemokine (C-C motif) ligand 3-like 1|chemokine (C-C motif) ligand 3-like 3|chemokine (C-C motif) ligand 3|c-C motif chemokine 3-like	NM_021006.4|NM_001001437.3|NM_002983.2|XM_003960672.1
ATF1	PH_hs_0032288	45	91	150	274	0.00650681	0.000590585	0.000111309	2.16164e-05	-50	0	0	0	0.000101587	1.21454e-05	67.0214	211.776	0.269176	0.236894	0.731765	0.0609171	activating transcription factor 1	NM_005171.4
YBEY	PH_hs_0045554	630	954	1773	2065	2.46877e-06	1.29108e-06	6.77856e-07	6.02642e-07	0	0	0	0	5.66392e-11	3.06728e-20	785.885	1918.49	0.155085	0.109386	0.731632	0.00653404	ybeY metallopeptidase (putative)	NM_001006114.1,NM_058181.1
GPR68	PH_hs_0000939	594	805	1684	1721	2.75212e-06	1.64428e-06	7.02787e-07	6.90247e-07	0	0	0	0	2.84746e-15	5.34491e-39	695.974	1702.46	0.128032	0.0768621	0.730394	0.000890972	G protein-coupled receptor 68	NM_001177676.1,NM_003485.3
YIF1A	PH_hs_0026096	673	1007	1782	2315	2.19927e-06	1.20327e-06	6.71138e-07	5.57211e-07	0	0	0	0	2.24412e-11	1.24762e-13	833.754	2047.55	0.151814	0.136628	0.730232	0.011289	Yip1 interacting factor homolog A (S. cerevisiae)	NM_020470.2
NEK7	PH_hs_0040147	222	276	594	645	3.18285e-05	1.67716e-05	0.00818673	2.36847e-06	0	0	0	0	4.0352e-18	4.07404e-14	248.271	619.415	0.116298	0.133906	0.730206	0.0312662	NIMA-related kinase 7	NM_133494.2
SRP19	PH_hs_0049612	210	296	671	590	3.77236e-05	2.7863e-05	2.2087e-06	2.78724e-06	0	0	0	0	1.1563e-11	1.49492e-19	251.483	630.657	0.149593	0.111494	0.730189	0.00879423	signal recognition particle 19kDa	NM_001204196.1,NM_001204194.1,NM_001204193.1,NM_003135.2
PIK3CD	PH_hs_0033291	69	94	223	204	0.00144599	0.000533692	3.13713e-05	4.12777e-05	-50	0	0	0	7.10334e-10	5.00094e-19	81.0787	213.538	0.165204	0.113185	0.729512	0.00457579	phosphatidylinositol-4,5-bisphosphate 3-kinase, catalytic subunit delta	NM_005026.3
SAV1	PH_hs_0023289	101	122	238	302	0.000449774	0.00758614	2.57831e-05	1.30632e-05	0	0	0	0	2.16958e-11	1.52775e-12	111.253	269.886	0.151699	0.143366	0.729483	0.0190646	salvador homolog 1 (Drosophila)	NM_021818.3
TBC1D5	PH_hs_0048362	613	1164	1962	2256	2.59487e-06	1.00984e-06	6.23571e-07	5.66507e-07	0	0	0	0	9.59498e-07	1.89481e-21	876.962	2108.49	0.210006	0.105952	0.728831	0.0365638	TBC1 domain family, member 5	NM_001134381.1,NM_001134380.1,NM_014744.2
SUN3	PH_hs_0019317	81	134	301	325	0.446128	0.000164622	1.52728e-05	0.119148	0	0	0	0	0.263397	2.11028e-05	106.445	312.96	1.58001	0.244197	0.728326	0.121149	Sad1 and UNC84 domain containing 3	NM_001030019.1,NM_152782.3
SH2D5	PH_hs_0031957	636	823	1738	1810	2.42698e-06	1.59087e-06	6.84774e-07	6.65231e-07	0	0	0	0	3.79186e-18	6.425e-35	726.647	1773.89	0.116202	0.0814882	0.727977	0.000267041	SH2 domain containing 5	NM_001103161.1,NM_001103160.1
ANKLE2	PH_hs_0027015	1225	1573	3214	3410	9.5387e-07	7.45261e-07	4.65842e-07	4.53482e-07	0	0	0	0	1.54386e-19	3.06045e-32	1393.79	3311.69	0.111538	0.085019	0.727877	0.000147605	ankyrin repeat and LEM domain containing 2	NM_015114.1
PRPF3	PH_hs_0001115	491	566	1283	1323	0.0052994	3.0189e-06	9.07806e-07	8.80918e-07	0	0	0	0	1.08294e-16	2.91124e-36	527.941	1302.94	0.121765	0.0798739	0.727336	0.00135985	PRP3 pre-mRNA processing factor 3 homolog (S. cerevisiae)	NM_004698.2
EIF4A2	PH_hs_0030638	6501	7890	16097	15354	3.66086e-07	3.50886e-07	3.16763e-07	3.18286e-07	0	0	0	0	2.87754e-26	1.6956e-32	7178.72	15727.1	0.0948923	0.0846609	0.727188	8.51449e-05	eukaryotic translation initiation factor 4A2	NM_001967.3
TLE4	PH_hs_0005573	45	101	205	256	0.00510921	0.000420088	4.06449e-05	2.08083e-05	-50	0	0	0	0.000273266	8.34408e-13	71.7844	230.41	0.289281	0.141649	0.72713	0.00500071	transducin-like enhancer of split 4 (E(sp1) homolog, Drosophila)	NM_007005.3
TSN	PH_hs_0004268	60	101	203	258	0.00228451	0.000417005	4.24725e-05	2.04256e-05	-50	0	0	0	2.24016e-06	3.8181e-12	79.6772	230.402	0.217971	0.146087	0.726679	0.00612655	translin	NM_001261401.1,NM_004622.2,NR_048559.1,NR_048557.1,NR_048558.1,NR_048556.1
TBC1D12	PH_hs_0061765	39	80	171	186	0.0105834	0.384324	7.23947e-05	5.53672e-05	-50	0	0	0	0.213221	1.43666e-19	58.6251	178.475	1.25739	0.11144	0.726554	0.5925	TBC1 domain family, member 12	NM_015188.1
SCGB2B2	PH_hs_0060007	82	118	213	269	0.00106126	0.000248769	3.64079e-05	1.80707e-05	0	0	0	0	4.01844e-09	1.7819e-12	99.3503	240.901	0.17338	0.143813	0.724271	0.0278022	secretoglobin, family 2B, member 2	NM_001025591.2
FXYD5	PH_hs_0016332	4298	5978	10209	12486	4.13542e-07	3.73845e-07	3.35318e-07	3.25956e-07	0	0	0	0	5.34882e-15	3.44698e-17	5108.85	11343.5	0.129355	0.119777	0.723548	0.00392101	FXYD domain containing ion transport regulator 5	NM_001164605.1,NM_014164.5,NM_144779.2,NR_028406.1
LOC101060521	PH_hs_0029851	595	755	1501	1802	3.22815e-06	1.8163e-06	7.77547e-07	6.65189e-07	0	0	0	0	2.14491e-19	7.84452e-18	672.685	1650.97	0.111992	0.117344	0.723212	0.00131607	DNA-directed RNA polymerase III subunit RPC5-like	XM_003960626.1,XM_003960625.1,XM_003960624.1,XM_003960623.1,XM_003960622.1,XM_003960621.1,XM_003960620.1
AK2	PH_hs_0047238	136	200	392	439	0.000157084	4.39254e-05	6.69138e-06	5.13923e-06	0	0	0	0	6.88606e-10	5.32364e-21	166.821	415.419	0.165068	0.107188	0.72294	0.0141399	adenylate kinase 2	NM_001199199.1,NM_013411.4,NR_037591.1
ZNF384	PH_hs_0029067	475	610	1276	1382	1.45824e-05	2.61811e-06	9.12969e-07	8.41407e-07	0	0	0	0	1.54996e-17	9.33159e-28	540.479	1328.82	0.118445	0.0921145	0.722055	0.000578185	zinc finger protein 384	NM_133476.4,NM_001039920.2,NM_001135734.2
LOC642131|LOC100653243	PH_hs_0045261	47	106	204	281	0.00453318	0.000354886	4.13353e-05	1.59427e-05	-50	0	0	0	0.000265855	7.32272e-10	75.2183	242.362	0.288663	0.165338	0.721587	0.0135031	uncharacterized LOC642131|uncharacterized LOC100653243	XM_003960553.1,XM_001716834.3,XM_001716198.4|XM_003960876.1
SH3BP4	PH_hs_0030751	334	462	954	1083	1.7914e-05	4.58575e-06	1.65991e-06	0.452268	0	0	0	0	2.60561e-13	0.327595	395.795	1018.28	0.13851	2.23932	0.721378	0.00242692	SH3-domain binding protein 4	NM_014521.2
WDR20	PH_hs_0060332	51	77	155	186	0.00358068	0.0124408	9.98007e-05	5.66706e-05	-50	0	0	0	5.90657e-06	1.463e-13	63.5104	170.445	0.228258	0.137028	0.721206	0.0116416	WD repeat domain 20	NM_001242415.1
HIF1A	PH_hs_0048513	347	490	775	1396	9.05907e-06	4.03922e-06	1.7435e-06	8.33155e-07	0	0	0	0	9.90226e-13	2.39477e-06	415.972	1084.38	0.142129	0.218637	0.721041	0.0649847	hypoxia inducible factor 1, alpha subunit (basic helix-loop-helix transcription factor)	NM_001243084.1,NM_181054.2,NM_001530.3
GATC	PH_hs_0044917	334	574	979	1236	9.99164e-06	2.93542e-06	1.24772e-06	9.44758e-07	0	0	0	0	7.13142e-08	1.26105e-14	449.141	1107.04	0.190048	0.131221	0.72036	0.0313627	glutamyl-tRNA(Gln) amidotransferase, subunit C	NR_033684.1,NM_176818.2
ING1	PH_hs_0028890	157	210	451	460	9.57054e-05	3.8275e-05	4.83694e-06	4.63061e-06	0	0	0	0	4.09199e-13	8.82013e-34	182.634	455.49	0.139703	0.0829338	0.720162	0.0035855	inhibitor of growth family, member 1	NM_001267728.1,NM_198217.2,NM_198218.2,NM_198219.2,NM_005537.4
TRIQK	PH_hs_0038404	144	261	463	526	0.000127498	1.96872e-05	4.56562e-06	3.48861e-06	0	0	0	0	1.32081e-06	2.83391e-20	200.084	494.391	0.212907	0.109284	0.720096	0.0510233	triple QxxK/R motif containing	NM_001171795.1,NM_001171799.1,NM_001171798.1,NM_001171797.1,NM_001171796.1,NM_001191036.1,NM_001191035.1
CTSC	PH_hs_0048448	78	76	179	183	0.000977283	0.00106282	6.26282e-05	5.83246e-05	0	0	0	0	3.88905e-12	7.04452e-26	77.241	180.995	0.146144	0.0956597	0.719314	0.00686431	cathepsin C	NM_148170.3,NM_001114173.1
NUTF2	PH_hs_0035831	437	501	1137	1172	5.19164e-06	0.0311698	1.03748e-06	1.18126e-06	0	0	0	0	8.95166e-11	9.14211e-36	468.568	1154.45	0.156781	0.0804597	0.718838	0.00976926	nuclear transport factor 2	NM_005796.1
DCTN6	PH_hs_0031910	191	277	512	653	5.08161e-05	1.71756e-05	3.6855e-06	2.31682e-06	0	0	0	0	7.00661e-11	1.49239e-13	232.436	582.249	0.155866	0.137079	0.718513	0.0149611	dynactin 6	NM_006571.3
MOB1B	PH_hs_0002673	310	442	888	953	1.21719e-05	5.06017e-06	1.42449e-06	1.29292e-06	0	0	0	0	3.22993e-12	2.8706e-28	373.641	920.393	0.145579	0.091214	0.71754	0.00356412	MOB kinase activator 1B	NM_001244766.1,NM_173468.3
DDX6	PH_hs_0049199	1198	2154	3670	4082	9.77626e-07	5.83998e-07	4.39421e-07	3.34377e-05	0	0	0	0	1.39086e-07	2.7453e-21	1656.32	3875.3	0.194641	0.10639	0.717102	0.0462489	DEAD (Asp-Glu-Ala-Asp) box helicase 6	NM_001257191.1,NM_004397.4
PPP3CC	PH_hs_0004287	224	308	732	544	9.71622e-05	1.23993e-05	1.90903e-06	0.00122348	0	0	0	0	1.52356e-12	1.70521e-09	264.565	638.353	0.143358	0.16919	0.716817	0.0638192	protein phosphatase 3, catalytic subunit, gamma isozyme	NM_001243975.1,NM_001243974.1,NM_005605.4
ARIH1	PH_hs_0047405	269	448	776	982	1.80417e-05	4.9094e-06	1.73973e-06	1.34116e-06	0	0	0	0	3.02048e-08	2.68087e-14	354.925	878.634	0.184584	0.132929	0.716705	0.0276518	ariadne homolog, ubiquitin-conjugating enzyme E2 binding protein, 1 (Drosophila)	NM_005744.3
PISD	PH_hs_0043460	859	1115	2278	2470	1.49388e-06	1.06146e-06	5.62925e-07	0.00133157	0	0	0	0	2.4028e-18	1.06926e-17	983.065	2373.68	0.115502	0.117841	0.716342	0.0148031	phosphatidylserine decarboxylase	NM_014338.3
RRN3	PH_hs_0006073	3461	3959	8314	8261	4.5073e-07	4.26573e-07	3.4734e-07	3.47763e-07	0	0	0	0	1.22828e-35	3.39605e-41	3706.79	8287.71	0.080613	0.074675	0.716212	2.33838e-05	RRN3 RNA polymerase I transcription factor homolog (S. cerevisiae)	NM_018427.3
SNHG1	PH_hs_0037289	15313	15558	32279	33183	3.18373e-07	3.17872e-07	3.01349e-07	3.0094e-07	0	0	0	0	7.83791e-28	6.39927e-40	15467.7	32729.8	0.0919795	0.0759214	0.716126	0.000417363	small nucleolar RNA host gene 1 (non-protein coding)	NR_003098.1
ITGB3	PH_hs_0004893	124	148	338	330	0.000211051	0.000116278	9.68704e-06	1.03103e-05	0	0	0	0	8.22322e-18	1.48673e-28	135.739	334.019	0.117419	0.0907227	0.71604	0.00173825	integrin, beta 3 (platelet glycoprotein IIIa, antigen CD61)	NM_000212.2
USP47	PH_hs_0025824	112	152	258	400	0.000302575	0.000108215	2.03468e-05	6.37616e-06	0	0	0	0	1.48745e-11	7.70817e-08	131.33	328.744	0.150426	0.190566	0.715662	0.0453881	ubiquitin specific peptidase 47	NM_017944.3
ZFP62	PH_hs_0030601	35	80	157	198	0.0097606	0.00119154	9.71475e-05	4.54395e-05	-50	0	0	0	0.000526066	8.63397e-12	56.5203	177.427	0.305231	0.148645	0.715505	0.00781731	ZFP62 zinc finger protein	NM_001172638.1,NM_152283.4
USB1	PH_hs_0060316	110	146	285	322	0.000313524	0.000121654	0.10171	1.09985e-05	0	0	0	0	3.10713e-12	4.06865e-06	127.42	303.436	0.145462	0.224138	0.715093	0.151212	U6 snRNA biogenesis 1	NM_001204911.1
TXNL4B	PH_hs_0008085	235	271	605	655	6.00843e-05	1.76893e-05	2.65938e-06	2.30348e-06	0	0	0	0	4.05448e-24	5.59953e-26	252.73	629.917	0.099381	0.0954612	0.715072	0.000144769	thioredoxin-like 4B	NM_001142318.1,NM_001142317.1,NM_017853.2
HMGA2	PH_hs_0044713	353	305	800	840	8.66736e-06	1.27316e-05	1.66015e-06	1.54342e-06	0	0	0	0	2.39049e-12	2.33355e-31	331.014	819.938	0.144677	0.0862862	0.714821	0.0103754	high mobility group AT-hook 2	NM_003484.1
USP31	PH_hs_0047348	196	293	593	607	4.67884e-05	1.41924e-05	2.7596e-06	2.64325e-06	0	0	0	0	3.92269e-10	1.00701e-34	242.688	599.982	0.162654	0.0817308	0.714391	0.0106141	ubiquitin specific peptidase 31	NM_020718.3
MOB2	PH_hs_0001693	387	511	938	1178	6.90114e-06	3.70234e-06	0.0067299	9.96239e-07	0	0	0	0	5.28202e-16	3.52659e-10	447.022	1057.57	0.124686	0.162209	0.71432	0.0470937	MOB kinase activator 2	NM_001172223.1,NM_053005.4
GGT7	PH_hs_0043213	83	99	197	234	0.000811198	0.00219646	4.66179e-05	2.71414e-05	0	0	0	0	2.14002e-13	7.97673e-15	90.8268	215.435	0.138	0.130214	0.713972	0.00701455	gamma-glutamyltransferase 7	NM_178026.2
DEGS1	PH_hs_0023594	538	585	1426	1312	0.000554026	2.83409e-06	8.16502e-07	8.87195e-07	0	0	0	0	1.78994e-24	2.0179e-25	561.722	1369.23	0.0985955	0.096586	0.713547	0.00374509	delta(4)-desaturase, sphingolipid 1	NM_003676.3
SOCS5	PH_hs_0060931	1075	1494	2707	3357	1.10896e-06	7.80897e-07	5.08173e-07	4.56637e-07	0	0	0	0	1.52838e-14	4.32481e-16	1277.24	3030.85	0.13165	0.124306	0.713385	0.0048058	suppressor of cytokine signaling 5	NM_144949.2,NM_014011.4
NFKBIE	PH_hs_0026336	162	187	416	447	8.63962e-05	5.43345e-05	0.0195325	4.93397e-06	0	0	0	0	2.59952e-22	5.31373e-12	174.31	431.449	0.103689	0.147108	0.713051	0.0441353	nuclear factor of kappa light polypeptide gene enhancer in B-cells inhibitor, epsilon	NM_004556.2
BCAS2	PH_hs_0042151	786	1477	2428	2825	1.70578e-06	7.89267e-07	5.41021e-07	4.96672e-07	0	0	0	0	6.4167e-07	1.55407e-20	1117.07	2625.81	0.206513	0.108517	0.712621	0.0374773	breast carcinoma amplified sequence 2	NM_005872.2
ATP6V1C1	PH_hs_0004880	2582	3243	6141	7015	5.21961e-07	4.63881e-07	3.71269e-07	3.59694e-07	0	0	0	0	4.90396e-22	1.27153e-22	2903.24	6576.49	0.104396	0.102909	0.7126	0.000494439	ATPase, H+ transporting, lysosomal 42kDa, V1 subunit C1	NM_001695.4
ERCC1	PH_hs_0025459	209	364	681	708	3.82806e-05	8.02872e-06	2.15321e-06	2.08728e-06	0	0	0	0	2.23911e-07	2.02047e-32	283.345	694.46	0.198121	0.0847667	0.712449	0.0321431	excision repair cross-complementing rodent repair deficiency, complementation group 1 (includes overlapping antisense sequence)	NM_202001.2
ESCO1	PH_hs_0015077	232	275	512	782	2.78375e-05	1.69442e-05	3.68793e-06	1.71905e-06	0	0	0	0	3.69387e-22	1.69623e-08	253.057	646.514	0.104079	0.181164	0.711546	0.0243667	establishment of cohesion 1 homolog 1 (S. cerevisiae)	NM_052911.2
AMIGO3	PH_hs_0034955	101	190	250	261	0.000418773	0.487703	2.22987e-05	1.96719e-05	0	0	0	0	0.461509	4.30724e-26	143.641	255.483	10.3485	0.0952358	0.711385	0.000453413	adhesion molecule with Ig-like domain 3	NM_198722.2
SPDYA	PH_hs_0026688	66	77	185	154	0.00170813	0.00465397	5.62587e-05	0.000102092	-50	0	0	0	1.20212e-12	6.61777e-13	71.4031	169.559	0.142678	0.141007	0.710237	0.0243781	speedy homolog A (Xenopus laevis)	NM_001142634.1,NM_182756.3,NM_001008779.1
KLHL29	PH_hs_0047929	278	430	818	899	1.64545e-05	0.000172998	1.70291e-06	0.000696566	0	0	0	0	1.17286e-08	1.38675e-17	351.087	858.363	0.179072	0.118263	0.710043	0.044247	kelch-like 29 (Drosophila)	NM_052920.1
POP4	PH_hs_0047248	136	154	340	375	0.000153968	0.000104137	9.79863e-06	7.45193e-06	0	0	0	0	1.15992e-22	7.72151e-22	144.911	357.441	0.10281	0.104911	0.709896	0.000533448	processing of precursor 4, ribonuclease P/MRP subunit (S. cerevisiae)	NM_006627.2,NR_027368.1
SLMO2	PH_hs_0000439	80	104	183	268	0.0982872	0.000380768	5.81831e-05	1.82599e-05	0	0	0	0	1.10928e-05	1.82847e-08	91.6298	225.347	0.235756	0.181598	0.70922	0.130003	slowmo homolog 2 (Drosophila)	NM_001256403.1,NM_016045.2
BBS4	PH_hs_0002334	142	245	431	511	0.000133496	2.36623e-05	5.35757e-06	3.70498e-06	0	0	0	0	3.57911e-07	4.94882e-17	191.411	470.86	0.201734	0.120395	0.708915	0.0458848	Bardet-Biedl syndrome 4	NM_001252678.1,NM_033028.4,NR_045566.1,NR_045565.1
INSIG1	PH_hs_0028376	1436	1623	3544	3608	8.10864e-07	7.27425e-07	4.45938e-07	4.43183e-07	0	0	0	0	8.5654e-37	2.70002e-41	1528.63	3575.93	0.0792614	0.0745802	0.70884	3.93488e-05	insulin induced gene 1	NM_198336.2,NM_198337.2,NM_005542.4
GPCPD1	PH_hs_0042082	109	129	278	295	0.000323607	0.000187404	1.64896e-05	1.39885e-05	0	0	0	0	1.77132e-17	7.55963e-25	118.797	286.473	0.118664	0.0977871	0.708725	0.0012088	glycerophosphocholine phosphodiesterase GDE1 homolog (S. cerevisiae)	NM_019593.3
NSRP1	PH_hs_0042396	221	365	617	823	3.22602e-05	7.97448e-06	2.56391e-06	1.6371e-06	0	0	0	0	3.15464e-08	5.17929e-12	290.136	719.632	0.184849	0.147028	0.708354	0.0362762	nuclear speckle splicing regulatory protein 1	NM_001261467.1,NM_032141.3
DNAJB4	PH_hs_0024315	128	156	337	357	0.000190786	0.000646391	9.76418e-06	8.42332e-06	0	0	0	0	7.21697e-15	3.53861e-26	141.654	346.968	0.129998	0.0950679	0.706964	0.00203986	DnaJ (Hsp40) homolog, subfamily B, member 4	NM_007034.3
SNX29	PH_hs_0047564	140	206	435	411	0.000139842	4.00464e-05	5.24617e-06	5.98049e-06	0	0	0	0	6.15778e-10	1.89734e-25	171.783	423.05	0.16458	0.096531	0.7061	0.0177344	sorting nexin 29	NM_032167.3
ZNF335	PH_hs_0022846	189	256	504	515	5.25003e-05	0.195	3.80738e-06	3.64278e-06	0	0	0	0	0.00393958	3.90465e-34	221.381	509.487	0.376335	0.0824759	0.705819	0.115786	zinc finger protein 335	NM_022095.3
USP6NL	PH_hs_0014285	60	86	192	189	0.00222804	0.000711109	4.99426e-05	5.25026e-05	-50	0	0	0	1.87415e-08	2.51233e-25	72.5327	190.508	0.181742	0.0967822	0.705579	0.00273845	USP6 N-terminal like	NM_014688.2,NM_001080491.2
MED23	PH_hs_0044267	109	160	283	391	0.0159808	8.99019e-05	1.57527e-05	6.73738e-06	0	0	0	0	1.76594e-07	3.25709e-10	133.562	336.807	0.196363	0.161879	0.704944	0.0736766	mediator complex subunit 23	NM_001270522.1,NM_001270521.1,NM_015979.3,NM_004830.3
HIVEP2	PH_hs_0004266	244	257	627	615	2.39881e-05	2.06119e-05	2.49022e-06	2.57912e-06	0	0	0	0	1.72564e-24	7.44963e-33	250.798	621.03	0.0985607	0.0841696	0.704896	0.00100734	human immunodeficiency virus type I enhancer binding protein 2	NM_006734.3
MOK	PH_hs_0005777	5668	7300	14210	13724	3.79194e-07	3.56571e-07	3.20957e-07	3.22232e-07	0	0	0	0	4.47704e-20	7.52236e-35	6459.39	13968.1	0.109879	0.0815731	0.704891	0.00032008	MOK protein kinase	NR_073542.1,NR_073541.1,NR_073543.1,NM_001272011.1,NM_014226.2
RPLP1	PH_hs_0045559	21779	29881	44621	60420	3.0866e-07	3.02555e-07	2.97221e-07	2.94426e-07	0	0	0	0	7.0757e-16	2.63172e-12	25692	52492.2	0.125248	0.144964	0.704421	0.0125018	ribosomal protein, large, P1	NM_001003.2
C12orf45	PH_hs_0042054	814	1108	2065	2505	1.61687e-06	1.06939e-06	6.01187e-07	5.31037e-07	0	0	0	0	2.23532e-15	2.50071e-17	956.052	2284.22	0.127535	0.119237	0.704379	0.00341458	chromosome 12 open reading frame 45	NM_152318.2
EMC3	PH_hs_0043157	343	448	915	1009	9.32699e-06	4.91319e-06	1.40736e-06	1.20025e-06	0	0	0	0	2.29823e-16	8.31881e-25	393.863	961.841	0.123127	0.0978759	0.704278	0.00108355	ER membrane protein complex subunit 3	NM_018447.2
UBE3A	PH_hs_0032024	264	413	789	851	1.91029e-05	5.96951e-06	1.69558e-06	1.517e-06	0	0	0	0	1.93951e-09	2.95907e-27	335.624	819.897	0.1698	0.0930222	0.704213	0.0129133	ubiquitin protein ligase E3A	NM_130838.1,NM_130839.2,NM_000462.3
DNAJC27	PH_hs_0025370	273	397	774	886	0.00369036	6.49077e-06	1.7473e-06	1.43162e-06	0	0	0	0	2.99481e-09	9.46498e-21	332.739	829.806	0.171909	0.107896	0.703882	0.0188098	DnaJ (Hsp40) homolog, subfamily C, member 27	NM_001198559.1,NM_016544.2
DMRT1	PH_hs_0005445	302	209	622	692	1.3066e-05	4.93056e-05	2.52649e-06	0.455227	0	0	0	0	4.24994e-07	0.335789	258.454	656.881	0.203106	2.35859	0.703822	0.0577069	doublesex and mab-3 related transcription factor 1	NM_021951.2
TECPR2	PH_hs_0047277	226	345	679	708	3.01272e-05	9.18844e-06	2.16408e-06	2.01653e-06	0	0	0	0	8.00339e-10	6.17188e-32	283.241	693.456	0.165731	0.0854503	0.703397	0.0120639	tectonin beta-propeller repeat containing 2	NM_014844.3
AEBP2	PH_hs_0034610	112	162	290	361	0.000296391	0.00387388	1.46117e-05	8.18766e-06	0	0	0	0	7.84981e-08	1.06908e-13	136.093	325.374	0.190688	0.136242	0.703054	0.0386831	AE binding protein 2	NM_153207.4,NM_001267043.1,NM_001114176.1
C19orf48	PH_hs_0013492	2020	2812	4766	6284	6.10578e-07	4.99663e-07	3.99287e-07	3.69335e-07	0	0	0	0	9.19589e-15	3.16246e-13	2402.24	5522.29	0.130524	0.139018	0.702916	0.0102983	chromosome 19 open reading frame 48	NM_199250.1,NM_199249.1
ACOX3	PH_hs_0035353	90	141	244	310	0.000679336	0.000136562	2.39512e-05	1.22052e-05	0	0	0	0	6.76153e-08	1.51651e-12	114.515	276.883	0.189695	0.143345	0.702599	0.0488467	acyl-CoA oxidase 3, pristanoyl	NM_003501.2,NM_001101667.1
DNAJA2	PH_hs_0047302	371	456	972	1038	7.65827e-06	4.72651e-06	1.25974e-06	1.99321e-06	0	0	0	0	6.62656e-21	1.18743e-28	412.406	1004.89	0.107456	0.0905567	0.702182	0.000270402	DnaJ (Hsp40) homolog, subfamily A, member 2	NM_005880.3
CNN3	PH_hs_0011493	260	535	871	1023	1.98908e-05	3.3721e-06	1.46411e-06	1.17962e-06	0	0	0	0	1.00347e-05	7.30971e-19	391.628	946.734	0.234515	0.113733	0.701904	0.0726656	calponin 3, acidic	NM_001839.3
POLR3D	PH_hs_0000169	741	938	1977	2013	1.87167e-06	5.94359e-06	6.20114e-07	6.12133e-07	0	0	0	0	4.60815e-19	2.84619e-40	836.67	1994.96	0.113068	0.0755712	0.701779	0.000236995	polymerase (RNA) III (DNA directed) polypeptide D, 44kDa	NM_001722.2
NOTCH1	PH_hs_0023725	375	395	932	951	7.45145e-06	6.57386e-06	1.42145e-06	1.29675e-06	0	0	0	0	4.38063e-27	2.11012e-37	385.457	941.478	0.0933369	0.078577	0.701499	0.000569515	notch 1	NM_017617.3
RPL7L1	PH_hs_0044127	5047	8083	12541	15583	3.92154e-07	3.49223e-07	3.25774e-07	3.17813e-07	0	0	0	0	5.82824e-10	3.09466e-16	6505.57	14056.6	0.164341	0.123678	0.701387	0.0173299	ribosomal protein L7-like 1	NM_198486.2
PIGT	PH_hs_0025598	398	484	1113	1031	8.15999e-06	4.71248e-06	1.141e-06	1.16763e-06	0	0	0	0	7.66393e-22	8.78559e-26	439.95	1072.16	0.104902	0.0958519	0.701367	0.00123147	phosphatidylinositol glycan anchor biosynthesis, class T	NM_001184730.2,NM_001184729.2,NM_001184728.2,NM_015937.5,NR_047695.1,NR_047694.1,NR_047693.1,NR_047692.1,NR_047691.1
SASH1	PH_hs_0022786	168	262	444	618	7.7078e-05	2.03158e-05	5.03667e-06	2.55815e-06	0	0	0	0	5.81312e-09	1.83383e-10	213.189	530.688	0.175281	0.159552	0.700747	0.0404817	SAM and SH3 domain containing 1	NM_015278.3
NRG1	PH_hs_0026301	94	103	220	245	0.000792136	0.000392304	3.26958e-05	2.36615e-05	0	0	0	0	8.48105e-20	3.85198e-19	98.52	232.457	0.110726	0.112813	0.700621	0.00201967	neuregulin 1	NM_013958.3,NM_013959.3,NM_001160005.1,NM_013962.2
MCM7	PH_hs_0020775	1431	2223	3581	4881	8.13314e-07	5.72793e-07	4.45348e-07	3.96258e-07	0	0	0	0	1.39204e-10	6.12757e-12	1811.78	4228.67	0.15847	0.147554	0.700431	0.0239416	minichromosome maintenance complex component 7	NM_005916.3,NM_182776.1
ATL2	PH_hs_0044389	579	510	1010	1304	0.391524	3.71537e-06	1.24583e-05	8.92552e-07	0	0	0	0	0.174534	4.93677e-13	547.573	1156.48	1.06792	0.140208	0.699626	0.00569868	atlastin GTPase 2	NM_022374.2,NM_001135673.1,NR_024191.1
ZNF24	PH_hs_0022844	359	397	915	929	8.40201e-06	6.49012e-06	1.36652e-06	1.33814e-06	0	0	0	0	1.30282e-34	1.44463e-38	377.99	921.987	0.0818709	0.0773149	0.699025	0.000188148	zinc finger protein 24	NM_006965.2
SEC24A	PH_hs_0060473	261	307	688	671	1.96697e-05	1.2517e-05	2.11625e-06	0.0493659	0	0	0	0	1.38934e-23	1.05441e-09	283.558	679.54	0.1006	0.166967	0.698326	0.0724278	SEC24 family, member A (S. cerevisiae)	NM_001252231.1
NUP98	PH_hs_0045801	496	536	1228	1273	3.93779e-06	3.3594e-06	9.51355e-07	9.15258e-07	0	0	0	0	1.00311e-32	4.79047e-35	516.283	1250.43	0.0843464	0.0813308	0.698082	0.00020369	nucleoporin 98kDa	NM_005387.5,NM_139131.3
RASD1	PH_hs_0002273	151	225	462	452	0.000108769	3.053e-05	4.58631e-06	4.81319e-06	0	0	0	0	8.78271e-10	8.29999e-31	186.621	457.024	0.166145	0.0871069	0.697953	0.0172734	RAS, dexamethasone-induced 1	NM_001199989.1,NM_016084.4
GLE1	PH_hs_0032142	222	354	642	753	3.18034e-05	8.60468e-06	2.38667e-06	1.8545e-06	0	0	0	0	7.20315e-09	1.6879e-18	285.422	697.306	0.176414	0.114968	0.697737	0.0217406	GLE1 RNA export mediator homolog (yeast)	NM_001003722.1
IQCB1	PH_hs_0043887	274	411	765	894	1.71184e-05	6.33382e-06	1.77901e-06	1.41278e-06	0	0	0	0	1.74609e-10	4.68067e-19	339.933	829.275	0.159358	0.11309	0.697479	0.0111983	IQ motif containing B1	NM_001023570.2,NM_001023571.2
PLAUR	PH_hs_0032020	5333	6385	12660	12585	3.85765e-07	7.16718e-06	3.25387e-07	3.25629e-07	0	0	0	0	4.12338e-25	1.6569e-41	5847.3	12622.8	0.0972304	0.0743796	0.696744	7.39373e-05	plasminogen activator, urokinase receptor	NM_001005377.2,NM_002659.3
VPS4A	PH_hs_0026702	106	160	348	353	0.171165	8.99745e-05	8.99473e-06	8.6743e-06	0	0	0	0	0.000696833	6.60861e-33	131.983	350.496	0.312895	0.0840988	0.696728	0.126704	vacuolar protein sorting 4 homolog A (S. cerevisiae)	NM_013245.2
PFDN2	PH_hs_0015402	2800	3506	6510	7523	4.99216e-07	4.47977e-07	3.66329e-07	3.54308e-07	0	0	0	0	2.20899e-22	1.6273e-21	3143.22	7014.74	0.10351	0.105773	0.696691	0.000772793	prefoldin subunit 2	NM_012394.3
TFB2M	PH_hs_0000767	5328	8321	14626	14260	3.85871e-07	3.47283e-07	3.19937e-07	3.2085e-07	0	0	0	0	1.25695e-10	7.45922e-37	6766.79	14443.9	0.158075	0.0791931	0.696539	0.00832773	transcription factor B2, mitochondrial	NM_022366.2
ZNF474	PH_hs_0008877	87	85	208	194	0.00089029	0.000742498	3.88556e-05	4.84171e-05	0	0	0	0	1.4501e-12	2.98203e-20	86.2634	201.028	0.143216	0.10935	0.696522	0.0102275	zinc finger protein 474	NM_207317.1
RIMKLB	PH_hs_0028260	3	78	165	174	0.498228	0.00102962	8.14384e-05	6.85887e-05	-50	0	0	0	0.421519	6.34324e-22	38.7299	169.486	5.05029	0.104687	0.696492	0.00164355	ribosomal modification protein rimK-like family member B	NM_020734.2
C6orf106	PH_hs_0002289	130	219	399	489	0.0341707	3.34253e-05	6.41394e-06	4.06016e-06	0	0	0	0	1.16599e-05	4.9926e-15	172.713	443.841	0.23638	0.129208	0.696485	0.0928763	chromosome 6 open reading frame 106	NM_022758.4,NM_024294.2
USB1	PH_hs_0024762	280	312	724	753	1.61034e-05	0.380902	1.94419e-06	1.84497e-06	0	0	0	0	0.114877	1.24241e-32	295.937	738.457	0.832643	0.0844742	0.695699	0.136881	U6 snRNA biogenesis 1	NM_001195302.1,NM_024598.3
HEATR1	PH_hs_0023288	38	79	150	195	0.0080599	0.000940695	0.0001112	4.83416e-05	-50	0	0	0	0.000181077	8.9426e-11	57.6226	172.42	0.280408	0.156777	0.695141	0.0121592	HEAT repeat containing 1	NM_018072.5
IL7R	PH_hs_0060724	300	379	827	822	1.33215e-05	7.25948e-06	1.57907e-06	1.59332e-06	0	0	0	0	4.20851e-18	8.05523e-37	338.372	824.52	0.116364	0.079231	0.694897	0.000829259	interleukin 7 receptor	NM_002185.3
DDX5	PH_hs_0049450	449	477	1092	1151	4.91908e-06	4.28445e-06	1.08814e-06	1.02306e-06	0	0	0	0	2.80602e-29	1.23675e-31	463.451	1121.41	0.0895122	0.0858841	0.694183	0.000380859	DEAD (Asp-Glu-Ala-Asp) box helicase 5	NM_004396.3
DLC1	PH_hs_0000915	94	119	247	255	0.000529535	0.000240773	2.31031e-05	2.10454e-05	0	0	0	0	2.56804e-13	1.94628e-27	106.141	250.989	0.138473	0.0926896	0.694141	0.00580872	deleted in liver cancer 1	NM_001164271.1,NM_006094.4,NM_182643.2
LTV1	PH_hs_0022096	91	238	377	388	0.00059029	0.000103579	0.000133233	6.86314e-06	0	0	0	0	0.000589358	2.2375e-26	161.242	382.485	0.308263	0.0946799	0.694123	0.213017	LTV1 homolog (S. cerevisiae)	NM_032860.3
CCT2	PH_hs_0040227	3986	5586	10580	10031	4.25217e-07	3.83565e-07	4.01088e-07	3.3624e-07	0	0	0	0	1.31811e-14	3.77552e-31	4757.97	10306.6	0.131319	0.0865947	0.692336	0.00288168	chaperonin containing TCP1, subunit 2 (beta)	NM_001198842.1,NM_006431.2
WAC	PH_hs_0024133	1512	2162	4143	4185	7.72448e-07	5.82544e-07	4.19086e-07	4.17542e-07	0	0	0	0	1.96983e-13	1.23314e-43	1825.35	4163.98	0.137786	0.0724527	0.690966	0.00285533	WW domain containing adaptor with coiled-coil	NM_016628.4,NR_024557.2,NM_100486.3
IL12A	PH_hs_0000076	117	121	297	271	0.000255171	0.000227991	1.36732e-05	1.76643e-05	0	0	0	0	1.09086e-17	3.75255e-20	119.196	284.051	0.117873	0.109648	0.690804	0.00662237	interleukin 12A (natural killer cell stimulatory factor 1, cytotoxic lymphocyte maturation factor 1, p35)	NM_000882.3
GAB2	PH_hs_0002620	109	128	282	281	0.000323635	0.000188772	1.57858e-05	1.5997e-05	0	0	0	0	5.39897e-18	2.04448e-30	118.32	281.506	0.116753	0.0877044	0.690571	0.00209887	GRB2-associated binding protein 2	NM_012296.3,NM_080491.2
LGMN	PH_hs_0045209	56	76	152	176	0.00276397	0.00127226	0.000106531	6.67538e-05	-50	0	0	0	3.91589e-09	4.14285e-15	65.665	163.958	0.173249	0.128814	0.690378	0.00430959	legumain	NM_001008530.2,NM_005606.6
NACA2|NACA	PH_hs_0034272	3224	5580	7927	11339	4.65156e-07	3.80833e-07	3.50561e-07	3.31615e-07	0	0	0	0	2.64547e-08	1.59424e-10	4354.16	9626.88	0.183781	0.159	0.690144	0.0502158	nascent polypeptide-associated complex alpha subunit 2|nascent polypeptide-associated complex alpha subunit	NM_199290.3|NM_001113203.2,NM_001113202.1,NR_045277.1
NPC1	PH_hs_0024642	1045	1180	2824	2429	4.81378e-06	1.06577e-06	4.9675e-07	5.40883e-07	0	0	0	0	5.84553e-34	2.16875e-19	1111.89	2627.26	0.0827017	0.112007	0.689816	0.00359008	Niemann-Pick disease, type C1	NM_000271.4
REXO4	PH_hs_0030694	521	860	1597	1642	3.55568e-06	1.49105e-06	7.35534e-07	7.17941e-07	0	0	0	0	8.32507e-09	1.82041e-37	683.759	1619.44	0.177191	0.0785059	0.689491	0.0197058	REX4, RNA exonuclease 4 homolog (S. cerevisiae)	NM_020385.2
CRCP	PH_hs_0044097	701	719	1704	1689	2.05039e-06	1.96643e-06	6.95925e-07	7.01113e-07	0	0	0	0	4.62151e-26	1.4424e-38	711.313	1696.55	0.0952961	0.0773142	0.689157	0.00125094	CGRP receptor component	NM_001040648.1,NM_001040647.1,NM_014478.4,NM_001142414.1,NR_024548.1
CDC42SE2	PH_hs_0049321	734	947	1943	2016	1.90054e-06	3.32423e-06	6.28072e-07	6.11476e-07	0	0	0	0	4.9002e-18	6.75156e-36	837.274	1979.39	0.116601	0.0803032	0.689136	0.000406043	CDC42 small effector 2	NM_001038702.1,NM_020240.2
TRIM39	PH_hs_0024948	159	230	458	484	9.1889e-05	2.85704e-05	4.67752e-06	4.31396e-06	0	0	0	0	1.28626e-10	4.83431e-28	193.212	470.959	0.158164	0.0916089	0.689077	0.0121256	tripartite motif containing 39	NM_172016.2,NM_021253.3
TOPORS	PH_hs_0026080	325	333	781	824	1.07309e-05	1.14984e-05	2.0126e-05	1.58766e-06	0	0	0	0	6.66846e-23	1.54036e-27	329.617	802.432	0.102219	0.0925054	0.689021	0.00346927	topoisomerase I binding, arginine/serine-rich, E3 ubiquitin protein ligase	NM_001195622.1,NM_005802.4
CAMTA1	PH_hs_0049283	66	80	176	171	0.00165302	0.00090036	7.63927e-05	7.23924e-05	-50	0	0	0	4.30085e-13	6.97063e-23	72.832	173.512	0.139836	0.102266	0.688709	0.00525486	calmodulin binding transcription activator 1	NM_015215.2
B3GNT5	PH_hs_0023286	151	238	412	532	0.000108771	2.57838e-05	5.95045e-06	3.41268e-06	0	0	0	0	1.25497e-08	8.68654e-13	192.813	471.786	0.17945	0.141762	0.688474	0.0385926	UDP-GlcNAc:betaGal beta-1,3-N-acetylglucosaminyltransferase 5	NM_032047.4
LARP4B	PH_hs_0022932	339	572	967	1205	9.62557e-06	2.95679e-06	1.26812e-06	9.72245e-07	0	0	0	0	3.52314e-08	2.83301e-15	450.819	1085.58	0.185529	0.128022	0.68792	0.0342881	La ribonucleoprotein domain family, member 4B	NM_015155.2
MYH9	PH_hs_0031821	344	665	861	1687	9.2562e-06	2.24326e-06	1.48857e-06	7.31392e-07	0	0	0	0	2.17278e-06	1.32919e-05	497.746	1272.5	0.217669	0.238043	0.687592	0.14561	myosin, heavy chain 9, non-muscle	NM_002473.4
NUP37	PH_hs_0000528	654	1714	2386	2851	2.30982e-06	1.56216e-06	5.47037e-07	4.94293e-07	0	0	0	0	0.000230956	1.9764e-18	1160.5	2617.68	0.285557	0.115206	0.687405	0.139102	nucleoporin 37kDa	NM_024057.2
IL1RL1	PH_hs_0000011	131	99	304	241	0.000768604	0.000446072	1.28353e-05	2.49276e-05	0	0	0	0	5.82598e-07	3.07839e-12	116.084	272.619	0.205699	0.145434	0.687033	0.0784806	interleukin 1 receptor-like 1	NM_003856.2
INSIG1	PH_hs_0047586	9725	12618	22974	23705	3.37911e-07	3.2552e-07	3.07482e-07	3.06969e-07	0	0	0	0	1.44797e-19	5.85263e-39	11127.1	23338.5	0.11145	0.0769031	0.68672	0.000336826	insulin induced gene 1	NM_198336.2,NM_198337.2,NM_005542.4
FGFR1OP2|LOC100335030	PH_hs_0033152	86	97	205	221	0.00283016	0.000478911	4.07248e-05	3.23007e-05	0	0	0	0	1.98192e-16	2.09872e-21	91.4528	212.974	0.122855	0.106072	0.686492	0.00325081	FGFR1 oncogene partner 2|FGFR1 oncogene partner 2 pseudogene	NM_001171887.1,NM_015633.2|NR_033267.1
SOGA1	PH_hs_0048981	96	105	210	259	0.000508427	0.000365902	0.000163853	2.05544e-05	0	0	0	0	1.74751e-20	1.00783e-12	100.525	234.413	0.108665	0.142179	0.685798	0.0127438	suppressor of glucose, autophagy associated 1	NM_080627.2
VIMP	PH_hs_0002724	1332	1465	3170	3309	8.73134e-07	7.95399e-07	4.68865e-07	4.59612e-07	0	0	0	0	6.08836e-41	2.41592e-35	1398.65	3239.29	0.0749179	0.0809674	0.685662	0.000129849	VCP-interacting membrane protein	NM_018445.4
SMAD5	PH_hs_0048296	156	228	440	488	0.000125077	2.9539e-05	5.11192e-06	4.07721e-06	0	0	0	0	3.05213e-10	2.811e-22	190.681	463.918	0.161611	0.103775	0.685202	0.0155327	SMAD family member 5	NM_001001420.1,NM_001001419.1,NM_005903.5
FGF17	PH_hs_0013182	108	114	234	290	0.0016883	0.000409832	2.71694e-05	1.45978e-05	0	0	0	0	6.68186e-16	2.04067e-13	111.126	261.901	0.125138	0.137877	0.684231	0.0125843	fibroblast growth factor 17	NM_003867.2
CITED4	PH_hs_0042670	330	473	898	1022	1.03741e-05	4.35861e-06	1.40586e-06	1.18139e-06	0	0	0	0	4.03706e-12	1.61877e-21	398.93	959.786	0.146258	0.105767	0.683811	0.00693922	Cbp/p300-interacting transactivator, with Glu/Asp-rich carboxy-terminal domain, 4	NM_133467.2
DCTN2	PH_hs_0023515	246	482	682	1086	2.33776e-05	4.85945e-06	2.60667e-06	1.09553e-06	0	0	0	0	4.10101e-06	6.99725e-08	359.017	883.271	0.224223	0.189922	0.683538	0.106221	dynactin 2 (p50)	NM_006400.4,NM_001261413.1,NM_001261412.1
ZBTB43	PH_hs_0023974	597	652	1523	1459	2.72627e-06	2.35149e-06	7.67247e-07	7.98424e-07	0	0	0	0	7.7302e-36	2.03369e-31	624.678	1491.14	0.080373	0.0861986	0.683429	0.000735653	zinc finger and BTB domain containing 43	NM_001135776.1,NM_014007.3
CCT3	PH_hs_0000233	2937	4653	7862	7757	4.86765e-07	0.00331931	3.51136e-07	3.52085e-07	0	0	0	0	5.69908e-07	2.23709e-39	3761.62	7809.8	0.205515	0.0764719	0.682432	0.0335634	chaperonin containing TCP1, subunit 3 (gamma)	NM_001008800.2,NM_005998.4,NR_036564.1,NR_036565.1
ZSCAN25	PH_hs_0048137	405	491	1046	1096	6.19119e-06	4.32882e-05	1.14704e-06	1.08341e-06	0	0	0	0	2.95969e-20	1.47e-32	446.967	1070.92	0.10934	0.084575	0.682159	0.000286337	zinc finger and SCAN domain containing 25	NM_145115.2
SH3RF1	PH_hs_0032574	6	93	211	197	0.381284	0.000549313	3.71944e-05	4.62062e-05	-50	0	0	0	0.051677	2.01138e-20	47.4529	204.028	0.613947	0.108844	0.682124	0.00614767	SH3 domain containing ring finger 1	NM_020870.3
SLC41A1	PH_hs_0031050	241	306	662	676	2.4853e-05	6.19332e-05	0.237313	2.18125e-06	0	0	0	0	6.09993e-16	0.00242339	272.558	668.983	0.124962	0.354982	0.681644	0.15329	solute carrier family 41, member 1	NM_173854.4
DDX24	PH_hs_0024210	1187	1706	3036	3572	9.88458e-07	7.4992e-07	4.78752e-07	4.4442e-07	0	0	0	0	4.29901e-13	1.0236e-19	1437.15	3303.06	0.139835	0.110979	0.681546	0.00591633	DEAD (Asp-Glu-Ala-Asp) box polypeptide 24	NM_020414.3
METTL2B	PH_hs_0030169	938	1529	2258	3562	1.32069e-06	7.64483e-07	5.66149e-07	4.44957e-07	0	0	0	0	2.75209e-09	2.8183e-08	1221.82	2907.65	0.171492	0.184163	0.681143	0.0601455	methyltransferase like 2B	NM_018396.2
CEBPZ	PH_hs_0043297	1415	2213	3910	4233	8.22193e-07	5.74651e-07	4.28385e-07	4.15808e-07	0	0	0	0	2.13569e-10	4.40899e-29	1798.6	4070.96	0.16016	0.0898355	0.680658	0.0106263	CCAAT/enhancer binding protein (C/EBP), zeta	NM_005760.2
KTI12|TXNDC12	PH_hs_0034895	531	806	1545	1589	3.42489e-06	1.64115e-06	7.574e-07	7.38655e-07	0	0	0	0	8.5817e-11	2.54279e-37	663.3	1566.94	0.156622	0.0786671	0.680512	0.00981932	KTI12 homolog, chromatin associated (S. cerevisiae)|thioredoxin domain containing 12 (endoplasmic reticulum)	NM_138417.2|NR_046406.1,NR_046405.1
RBM19	PH_hs_0045073	98	143	275	300	0.000460896	0.000197285	1.71263e-05	0.103769	0	0	0	0	3.33797e-09	9.73674e-06	119.677	287.458	0.172447	0.234146	0.680487	0.199318	RNA binding motif protein 19	NM_016196.3
TAF8	PH_hs_0047788	90	109	216	247	0.000726062	0.000323268	3.46569e-05	2.31477e-05	0	0	0	0	7.72237e-15	2.97905e-17	99.2731	231.446	0.130144	0.119531	0.680365	0.00603549	TAF8 RNA polymerase II, TATA box binding protein (TBP)-associated factor, 43kDa	NM_138572.2
STAT5B	PH_hs_0025369	145	189	401	406	0.00012444	5.2612e-05	8.21577e-06	6.15484e-06	0	0	0	0	6.46978e-14	6.11706e-34	166.317	403.496	0.135011	0.0827272	0.679981	0.00565095	signal transducer and activator of transcription 5B	NM_012448.3
MORF4L1	PH_hs_0030762	1365	2439	3956	4511	8.51917e-07	5.39544e-07	4.26452e-07	4.07748e-07	0	0	0	0	1.07428e-07	1.18564e-22	1879.93	4232.54	0.192827	0.102833	0.679627	0.0344485	mortality factor 4 like 1	NM_001265605.1,NM_001265604.1,NM_001265603.1,NM_206839.2,NM_006791.3
PCK2	PH_hs_0044528	271	292	725	690	1.76619e-05	0.413145	1.93976e-06	2.10576e-06	0	0	0	0	0.188688	1.96054e-28	281.675	707.574	1.13284	0.0909283	0.67946	0.000888755	phosphoenolpyruvate carboxykinase 2 (mitochondrial)	NM_001018073.1,NM_004563.2
HECTD2	PH_hs_0022172	51	105	227	234	0.0102796	0.000368699	2.99164e-05	2.71452e-05	-50	0	0	0	0.000125801	6.07947e-27	76.8467	230.49	0.273178	0.0936022	0.67936	0.00128481	HECT domain containing E3 ubiquitin protein ligase 2	NM_182765.3
LOC101060344|LOC101060456|LOC100996723	PH_hs_0038314	79	97	194	211	0.000937856	0.000476936	4.84022e-05	3.72497e-05	0	0	0	0	1.23573e-13	2.53647e-20	87.7695	202.472	0.136604	0.109141	0.678958	0.00645788	uncharacterized LOC101060344|uncharacterized LOC101060456|uncharacterized LOC100996723	XM_003960252.1|XR_171192.1|XR_159152.1
RBBP4	PH_hs_0037097	108	189	308	398	0.000333237	5.2497e-05	1.24095e-05	6.45149e-06	0	0	0	0	9.99381e-07	2.39911e-12	146.848	352.84	0.210369	0.144688	0.676266	0.0834835	retinoblastoma binding protein 4	NM_001135256.1,NM_001135255.1,NM_005610.2
CNNM3	PH_hs_0049416	66	107	231	238	0.00167149	0.00034424	2.81964e-05	2.58381e-05	-50	0	0	0	6.24959e-07	3.67414e-27	85.6921	234.49	0.20629	0.0931954	0.676206	0.00130506	cyclin M3	NM_199078.2,NM_017623.4
DNAJB11	PH_hs_0023768	240	411	787	751	2.57999e-05	6.01524e-06	1.7022e-06	1.83241e-06	0	0	0	0	1.02851e-07	4.19765e-29	322.043	769.076	0.192526	0.0898002	0.675849	0.0373187	DnaJ (Hsp40) homolog, subfamily B, member 11	NM_016306.4
DBF4B	PH_hs_0025620	68	94	199	212	0.00151461	0.433034	4.4826e-05	3.66359e-05	-50	0	0	0	0.278801	2.62639e-22	80.5526	205.479	1.7053	0.1037	0.675768	0.776412	DBF4 homolog B (S. cerevisiae)	NM_145663.2
JMJD7	PH_hs_0049715	127	233	397	453	0.000193541	2.74725e-05	6.49539e-06	4.78961e-06	0	0	0	0	2.22818e-06	1.70872e-19	177.803	424.903	0.217918	0.111678	0.674069	0.0774611	jumonji domain containing 7	NM_001114632.1
KLF6	PH_hs_0036168	2464	2943	6288	5684	7.74091e-07	4.86257e-07	3.69075e-07	3.78905e-07	0	0	0	0	1.33503e-27	1.79965e-24	2698.26	5987.19	0.0923933	0.0986006	0.673172	0.00126198	Kruppel-like factor 6	NR_027653.1,NM_001160125.1,NM_001160124.1,NM_001300.5
ZNFX1	PH_hs_0024191	751	1200	2215	2255	1.83214e-06	9.75861e-07	5.76297e-07	5.66616e-07	0	0	0	0	1.17166e-09	1.54642e-40	966.722	2234.96	0.167447	0.0753108	0.672523	0.0149218	zinc finger, NFX1-type containing 1	NM_021035.2
HAS1	PH_hs_0003694	858	956	2066	2173	1.49616e-06	1.2875e-06	6.00962e-07	5.80581e-07	0	0	0	0	2.53299e-38	2.67886e-33	906.807	2119.33	0.0775742	0.0835704	0.672328	0.000132911	hyaluronan synthase 1	NM_001523.2
SF3A1	PH_hs_0048813	530	725	1455	1491	3.43663e-06	1.94152e-06	8.01791e-07	7.8236e-07	0	0	0	0	1.1609e-14	5.43974e-38	624.194	1472.95	0.131037	0.0779313	0.67211	0.0027653	splicing factor 3a, subunit 1, 120kDa	NM_001005409.1,NM_005877.4
MB21D2	PH_hs_0001151	137	162	359	360	0.000150226	8.63229e-05	8.30542e-06	8.24794e-06	0	0	0	0	4.12812e-19	1.47601e-33	149.248	359.503	0.112911	0.083227	0.672083	0.00167774	Mab-21 domain containing 2	NM_178496.3
APBB2	PH_hs_0032665	83	117	237	238	0.000853709	0.000268735	0.466753	0.0446427	0	0	0	0	1.23737e-09	0.369666	99.4002	237.501	0.167698	3.00537	0.670652	0.196302	amyloid beta (A4) precursor protein-binding, family B, member 2	NM_001166054.1,NM_001166053.1,NM_001166052.1,NM_001166051.1,NM_001166050.1,NM_004307.1,NM_173075.4
ADPRHL2	PH_hs_0001619	736	1045	1911	2223	1.89275e-06	1.14833e-06	6.35831e-07	5.71931e-07	0	0	0	0	2.53883e-13	2.11239e-20	885.003	2066.46	0.138443	0.108907	0.670184	0.00589457	ADP-ribosylhydrolase like 2	NM_017825.2
SLC6A15	PH_hs_0003225	125	138	328	297	0.000204113	0.000147723	1.04742e-05	1.36691e-05	0	0	0	0	2.81741e-24	6.54467e-20	131.502	312.561	0.099029	0.11038	0.670005	0.00630779	solute carrier family 6 (neutral amino acid transporter), member 15	NM_018057.6
ARHGEF6	PH_hs_0024220	35	42	63	84	0.290043	0.00662913	0.00190889	0.00510368	0	-50	-50	0	0.016018	4.27322e-07	38.421	73.4625	0.466426	0.203151	0.669641	0.757202	Rac/Cdc42 guanine nucleotide exchange factor (GEF) 6	NM_004840.2
SLC6A15	PH_hs_0031199	198	241	517	539	4.53274e-05	2.48425e-05	3.6126e-06	3.32049e-06	0	0	0	0	4.12468e-19	1.00098e-30	218.972	527.967	0.11291	0.08723	0.669597	0.000822013	solute carrier family 6 (neutral amino acid transporter), member 15	NM_001146335.2,NM_182767.5
EXOC8	PH_hs_0017264	595	831	1638	1612	2.74218e-06	0.00330401	7.35663e-07	7.4474e-07	0	0	0	0	3.07626e-09	8.92908e-37	708.883	1625.07	0.172041	0.079282	0.669295	0.0184568	exocyst complex component 8	NM_175876.3
MYPN	PH_hs_0062036	98	104	221	248	0.000549587	0.0105966	3.22448e-05	2.28399e-05	0	0	0	0	9.37089e-13	1.31777e-18	101.101	234.454	0.141974	0.114598	0.668657	0.0169903	myopalladin	NM_001256268.1,NM_001256267.1,NM_032578.3,NR_045663.3,NR_045662.3
TARS	PH_hs_0029021	7203	7944	15712	16151	3.59306e-07	3.50409e-07	3.17533e-07	3.16658e-07	0	0	0	0	1.68156e-44	8.54232e-40	7573.82	15930.9	0.0717212	0.0760474	0.668615	0.00013351	threonyl-tRNA synthetase	NM_001258438.1,NM_001258437.1,NM_152295.4,NR_047678.1,NR_047677.1,NR_047676.1
EXOSC4	PH_hs_0032744	105	196	320	430	0.000366304	4.68003e-05	1.11806e-05	0.00442915	0	0	0	0	4.67686e-06	9.30899e-08	148.604	374.803	0.225652	0.191842	0.668371	0.193296	exosome component 4	NM_019037.2
OSMR	PH_hs_0045893	71	109	236	240	0.00131482	0.000323497	2.82005e-05	2.51521e-05	-50	0	0	0	8.92086e-08	4.59106e-29	89.2756	237.996	0.191552	0.0898646	0.66804	0.0018664	oncostatin M receptor	NM_001168355.1
EIF3M	PH_hs_0022126	697	1204	2045	2285	2.0704e-06	9.7234e-07	6.05293e-07	5.61823e-07	0	0	0	0	4.2804e-08	1.99982e-24	940.214	2164.59	0.186745	0.0987009	0.667619	0.0298411	eukaryotic translation initiation factor 3, subunit M	NM_006360.4
AIFM2	PH_hs_0006413	210	266	539	604	3.77664e-05	1.86963e-05	3.32147e-06	2.74124e-06	0	0	0	0	1.01958e-16	7.09022e-22	237.194	571.389	0.121658	0.104814	0.666936	0.00253423	apoptosis-inducing factor, mitochondrion-associated, 2	NM_001198696.1,NM_032797.5
KDM5B	PH_hs_0008434	110	162	313	329	0.000313477	8.88551e-05	1.18729e-05	0.00023069	0	0	0	0	2.04553e-09	2.67903e-22	135.041	320.975	0.170054	0.103722	0.666896	0.0533894	lysine (K)-specific demethylase 5B	NM_006618.3
ZCCHC7	PH_hs_0035104	101	140	220	357	0.000416209	0.000139711	3.30008e-05	8.42137e-06	0	0	0	0	1.17445e-10	4.33105e-07	119.826	288.253	0.157813	0.203259	0.666314	0.0801562	zinc finger, CCHC domain containing 7	NM_032226.2
HLA-J	PH_hs_0044973	81	115	188	209	0.00203026	0.291792	5.33864e-05	3.82788e-05	0	0	0	0	0.0426094	1.68446e-18	97.3952	198.464	0.580998	0.114965	0.66628	0.249331	major histocompatibility complex, class I, J (pseudogene)	NR_024240.1
EMC6	PH_hs_0002585	6164	9197	12884	20214	3.70924e-07	3.41075e-07	3.24677e-07	3.10444e-07	0	0	0	0	4.56593e-12	1.83505e-08	7623.92	16535.8	0.146637	0.181619	0.665659	0.0520457	ER membrane protein complex subunit 6	NM_001014764.1,NM_031298.2
ZSWIM6	PH_hs_0001332	112	145	263	354	0.0101172	0.000124465	1.92488e-05	8.60611e-06	0	0	0	0	4.33914e-10	8.06373e-11	127.996	308.337	0.163079	0.156389	0.665498	0.0564046	zinc finger, SWIM-type containing 6	NM_020928.1
PFKFB3	PH_hs_0027301	750	882	1872	1930	1.83622e-06	1.43987e-06	6.45855e-07	6.31201e-07	0	0	0	0	4.79849e-28	3.32765e-37	814.733	1900.92	0.0916032	0.0787976	0.665296	5.40784e-05	6-phosphofructo-2-kinase/fructose-2,6-biphosphatase 3	NM_004566.3,NM_001145443.1
PPP2CA	PH_hs_0005098	862	1136	2120	2498	2.34485e-06	1.08276e-06	5.90332e-07	5.31933e-07	0	0	0	0	3.91398e-17	2.02936e-19	994.646	2308.34	0.119993	0.111915	0.665232	0.0029292	protein phosphatase 2, catalytic subunit, alpha isozyme	NM_002715.2
EPT1	PH_hs_0031652	792	1236	2247	2396	1.6862e-06	9.45947e-07	5.67923e-07	0.000646961	0	0	0	0	2.92998e-10	1.45502e-20	1005.44	2321.26	0.161443	0.108434	0.665134	0.0513032	ethanolaminephosphotransferase 1 (CDP-ethanolamine-specific)	NM_033505.2
GPATCH3	PH_hs_0001075	142	150	341	358	0.000133586	0.000111599	9.46881e-06	8.3656e-06	0	0	0	0	7.68206e-21	2.05888e-27	146.163	349.474	0.107637	0.092734	0.664954	0.0016061	G patch domain containing 3	NM_022078.2
SLC26A5	PH_hs_0046379	78	110	219	210	0.000977446	0.000313784	3.31547e-05	3.77185e-05	0	0	0	0	1.68994e-09	2.77394e-23	93.4352	214.519	0.169148	0.101304	0.664922	0.02978	solute carrier family 26, member 5 (prestin)	NM_001167962.1,NM_198999.2,NM_206884.2,NM_206883.2
FERMT2	PH_hs_0045598	136	183	348	415	0.000154147	5.81811e-05	8.99566e-06	5.85066e-06	0	0	0	0	1.84152e-12	3.27486e-16	158.724	381.382	0.143909	0.123783	0.664507	0.014784	fermitin family member 2	NM_001135000.1
PSME2	PH_hs_0045480	1463	2210	3848	4328	7.96418e-07	5.74229e-07	4.33597e-07	4.12525e-07	0	0	0	0	2.04343e-11	4.23565e-24	1822.43	4087.18	0.151495	0.0994235	0.664423	0.00971476	proteasome (prosome, macropain) activator subunit 2 (PA28 beta)	NM_002818.2
DDX60L	PH_hs_0047512	76	95	192	159	0.00136659	0.000514852	4.99418e-05	0.200977	0	0	0	0	1.54578e-12	0.00111597	85.2383	175.563	0.1434	0.327065	0.663415	0.239809	DEAD (Asp-Glu-Ala-Asp) box polypeptide 60-like	NM_001012967.1
HIPK2	PH_hs_0047476	9695	11689	21669	22500	3.38084e-07	3.28793e-07	3.08776e-07	3.07934e-07	0	0	0	0	3.00718e-27	1.77324e-37	10668.8	22083.3	0.0930351	0.0784933	0.66328	4.81639e-05	homeodomain interacting protein kinase 2	NM_022740.4,NM_001113239.2
NCOA7	PH_hs_0023544	265	332	675	705	1.88306e-05	0.199602	2.18614e-06	2.03155e-06	0	0	0	0	0.00223037	1.26232e-31	297.57	689.954	0.351667	0.085897	0.663092	0.115412	nuclear receptor coactivator 7	NM_001199622.1,NM_001199621.1,NM_001199620.1,NM_001199619.1,NM_181782.4,NM_001122842.2
RPS9	PH_hs_0029205	16553	22694	34603	44695	3.159e-07	3.07762e-07	3.00343e-07	2.97203e-07	0	0	0	0	6.60643e-16	2.99919e-14	19519	39631	0.125116	0.133189	0.662705	0.0122012	ribosomal protein S9	NM_001013.3
C3orf58	PH_hs_0015017	653	633	1493	1539	2.34018e-06	2.44772e-06	9.27115e-07	7.60077e-07	0	0	0	0	5.23145e-20	1.64005e-36	645.095	1515.94	0.110083	0.0795848	0.662051	0.00411801	chromosome 3 open reading frame 58	NM_001134470.1,NM_173552.3
RSC1A1	PH_hs_0012899	41	82	167	182	0.0113839	0.00113809	7.85457e-05	5.92396e-05	-50	0	0	0	0.000141781	2.8045e-19	60.63	174.475	0.275492	0.112366	0.661717	0.00253976	regulatory solute carrier protein, family 1, member 1	NM_006511.1
UTP14A	PH_hs_0032403	492	686	1388	1362	4.00443e-06	2.12645e-06	8.37991e-07	8.53705e-07	0	0	0	0	1.06621e-13	8.4682e-36	585.623	1375.07	0.136236	0.0804201	0.661624	0.00530978	UTP14, U3 small nucleolar ribonucleoprotein, homolog A (yeast)	NM_001166221.1,NM_006649.3
HECTD4	PH_hs_0048245	82	122	200	275	0.00294946	0.000221529	4.39137e-05	1.74225e-05	0	0	0	0	4.04778e-08	7.23871e-10	101.255	237.366	0.186394	0.165287	0.661335	0.0743613	HECT domain containing E3 ubiquitin protein ligase 4	NM_001109662.3
ZFAND5	PH_hs_0019249	3918	4750	9082	9371	4.28081e-07	3.99725e-07	3.41818e-07	3.39993e-07	0	0	0	0	3.35821e-26	1.10287e-38	4324.01	9226.09	0.0950234	0.0771912	0.661202	8.10256e-05	zinc finger, AN1-type domain 5	NM_001102421.1,NM_001102420.1,NM_006007.2
HCFC1	PH_hs_0004770	663	984	1668	2183	2.25516e-06	1.23945e-06	7.08496e-07	1.47286e-06	0	0	0	0	1.26285e-11	5.44408e-13	817.538	1924.58	0.149883	0.140473	0.66115	0.0242774	host cell factor C1 (VP16-accessory protein)	NM_005334.2
SQRDL	PH_hs_0025406	2114	2257	4693	5030	5.92612e-07	5.66285e-07	4.01295e-07	3.92566e-07	0	0	0	0	4.18478e-35	8.81499e-31	2187.36	4860.95	0.0812587	0.0871464	0.660748	0.000497208	sulfide quinone reductase-like (yeast)	NM_001271213.1,NM_021199.3
ARMCX3	PH_hs_0010341	1097	1366	2694	2921	1.08238e-06	8.51198e-07	6.66614e-07	4.88119e-07	0	0	0	0	4.23224e-22	2.36307e-28	1227.85	2807.12	0.104231	0.0910679	0.660714	0.000323639	armadillo repeat containing, X-linked 3	NM_177948.2,NM_177947.2,NM_016607.3
TMEM161B	PH_hs_0024308	103	150	290	299	0.000397102	0.000116975	1.46786e-05	1.41261e-05	0	0	0	0	1.69532e-09	8.81317e-29	125.642	294.487	0.169163	0.0903378	0.660461	0.0312713	transmembrane protein 161B	NM_153354.3
GRPEL2	PH_hs_0028783	134	136	304	336	0.000161958	0.000154775	1.28314e-05	9.83973e-06	0	0	0	0	2.85876e-17	3.33729e-21	135.285	319.946	0.119461	0.106624	0.660177	0.00459534	GrpE-like 2, mitochondrial (E. coli)	NM_152407.3
GET4	PH_hs_0027205	90	119	235	240	0.000610672	0.000241555	2.68332e-05	0.0725856	0	0	0	0	1.27124e-11	4.33529e-08	104.036	237.494	0.149905	0.186826	0.659692	0.176633	golgi to ER traffic protein 4 homolog (S. cerevisiae)	NM_015949.2
TNFRSF1B	PH_hs_0032350	243	387	661	759	2.42422e-05	3.00688e-05	0.169217	1.80126e-06	0	0	0	0	1.29374e-08	0.000209393	312.19	709.83	0.179621	0.28345	0.659662	0.180016	tumor necrosis factor receptor superfamily, member 1B	NM_001066.2
SNX13	PH_hs_0049307	97	147	314	334	0.329695	0.000142064	1.17599e-05	9.99056e-06	0	0	0	0	0.0379191	2.7565e-25	121.056	323.968	0.563266	0.0968656	0.659649	0.195478	sorting nexin 13	NM_015132.4
ZNF252P	PH_hs_0047566	464	589	1160	1315	5.76327e-06	2.79486e-06	1.01384e-06	8.8471e-07	0	0	0	0	8.30071e-19	2.8732e-22	524.689	1237.23	0.113918	0.103799	0.65956	0.00173782	zinc finger protein 252, pseudogene	NR_023392.1
COPS2	PH_hs_0035410	319	453	841	978	1.12741e-05	4.7895e-06	1.79288e-06	1.25116e-06	0	0	0	0	2.10915e-12	1.66508e-19	383.616	909.261	0.144307	0.111642	0.659527	0.00905939	COP9 constitutive photomorphogenic homolog subunit 2 (Arabidopsis)	NM_001143887.1,NM_004236.3
ATG2A	PH_hs_0024152	244	424	607	718	2.39531e-05	0.137157	2.64228e-06	1.97035e-06	0	0	0	0	0.00567795	7.95775e-18	330.339	662.306	0.395015	0.117367	0.658995	0.158658	autophagy related 2A	NM_015104.2
WDFY1	PH_hs_0043240	673	807	1713	1730	2.19746e-06	1.6392e-06	7.03911e-07	7.01609e-07	0	0	0	0	3.20118e-25	5.37678e-42	738.495	1721.49	0.0970006	0.0739232	0.658976	0.000198017	WD repeat and FYVE domain containing 1	NM_020830.3
PPA1	PH_hs_0043401	456	684	1345	1308	9.12926e-06	2.13969e-06	8.6455e-07	8.89589e-07	0	0	0	0	6.6931e-11	6.74824e-34	565.728	1326.59	0.155697	0.0827825	0.65893	0.0140184	pyrophosphatase (inorganic) 1	NM_021129.3
DR1	PH_hs_0047239	96	126	223	293	0.000493764	0.000198784	3.14094e-05	1.4193e-05	0	0	0	0	4.17346e-12	2.89547e-11	110.527	257.875	0.14636	0.152694	0.658584	0.030819	down-regulator of transcription 1, TBP-binding (negative cofactor 2)	NM_001938.2
DNAL1	PH_hs_0037572	224	403	700	759	3.0979e-05	6.41721e-06	2.05525e-06	1.80517e-06	0	0	0	0	5.34646e-07	3.13854e-26	309.814	729.402	0.204984	0.0949659	0.658124	0.0532571	dynein, axonemal, light chain 1	NM_031427.3,NM_001201366.1
DDX19A	PH_hs_0024969	116	158	320	329	0.00217752	9.3735e-05	1.11809e-05	1.03915e-05	0	0	0	0	2.0543e-10	5.14486e-30	136.292	324.488	0.160004	0.0883288	0.657842	0.0249991	DEAD (Asp-Glu-Ala-Asp) box polypeptide 19A	NM_018332.3
ATP6V1C1	PH_hs_0048373	141	200	399	443	0.0490811	4.4161e-05	6.41296e-06	5.03904e-06	0	0	0	0	1.292e-06	7.66303e-22	169.452	420.925	0.212703	0.104902	0.657783	0.0738767	ATPase, H+ transporting, lysosomal 42kDa, V1 subunit C1	NM_001695.4
SCAF8	PH_hs_0026677	65	91	179	212	0.00371518	0.000594425	6.26698e-05	3.66938e-05	-50	0	0	0	9.99817e-09	1.20427e-14	77.5451	195.442	0.178189	0.131118	0.656441	0.00627162	SR-related CTD-associated factor 8	NM_014892.3
CCDC71L	PH_hs_0022078	1210	1141	2237	3183	9.66888e-07	1.14225e-06	2.64812e-05	4.6798e-07	0	0	0	0	1.02448e-18	5.61157e-10	1180.14	2708.3	0.114226	0.164178	0.656202	0.0422622	coiled-coil domain containing 71-like	NM_175884.4
PSME4	PH_hs_0047771	150	219	365	522	0.000111233	3.31575e-05	7.99462e-06	3.56223e-06	0	0	0	0	2.91506e-10	1.2474e-09	183.237	443.218	0.161422	0.167735	0.656108	0.0513391	proteasome (prosome, macropain) activator subunit 4	NM_014614.2
LUM	PH_hs_0040682	551	647	1338	1465	3.17854e-06	2.35472e-06	8.69154e-07	7.96093e-07	0	0	0	0	2.99781e-27	2.24066e-26	598.092	1401.29	0.0930326	0.0946811	0.654328	0.000252922	lumican	NM_002345.3
ST3GAL1	PH_hs_0039500	1560	1636	3871	3369	7.52087e-07	7.20979e-07	4.30099e-07	4.55901e-07	0	0	0	0	3.07915e-31	1.65685e-20	1600.07	3620.97	0.0864636	0.108598	0.654181	0.00625125	ST3 beta-galactoside alpha-2,3-sialyltransferase 1	NM_173344.2,NM_003033.3
CTNNA1	PH_hs_0028041	791	1322	2245	2444	1.68888e-06	8.79889e-07	0.0764404	5.41053e-07	0	0	0	0	1.00392e-08	1.62029e-07	1045.88	2344.17	0.178211	0.195737	0.653981	0.14744	catenin (cadherin-associated protein), alpha 1, 102kDa	NM_001903.2
ZNF433	PH_hs_0018078	109	114	263	251	0.00032317	0.000278059	1.92739e-05	2.20411e-05	0	0	0	0	5.51518e-18	5.87001e-24	111.652	257.025	0.116786	0.0997426	0.653712	0.00649351	zinc finger protein 433	NM_001080411.1
NRG1	PH_hs_0044682	448	529	1096	1194	4.91299e-06	3.44955e-06	6.7352e-06	1.65664e-06	0	0	0	0	9.7297e-26	1.05489e-24	487.692	1144.84	0.0959411	0.0980972	0.652993	0.000664878	neuregulin 1	NM_013958.3,NM_013959.3,NM_001160005.1,NM_013962.2
NDUFAF4	PH_hs_0026725	271	442	751	865	1.80107e-05	0.00109093	1.83186e-06	1.62627e-06	0	0	0	0	5.38759e-07	4.08287e-20	353.12	807.802	0.205047	0.109758	0.652966	0.0452295	NADH dehydrogenase (ubiquinone) complex I, assembly factor 4	NM_014165.3
SEC61B	PH_hs_0032087	7753	11722	18756	20946	3.65145e-07	3.28669e-07	3.12338e-07	3.09564e-07	0	0	0	0	1.25169e-11	2.50388e-25	9662.67	19847.3	0.149854	0.0967792	0.652727	0.0105681	Sec61 beta subunit	NM_006808.2
MTF1	PH_hs_0026548	129	187	387	357	0.000183959	5.79214e-05	6.90077e-06	8.42167e-06	0	0	0	0	4.18195e-10	2.8291e-22	156.946	372.06	0.162923	0.103782	0.651321	0.030458	metal-regulatory transcription factor 1	NM_005955.2
ZNF281	PH_hs_0061574	304	409	883	859	0.0952399	6.05351e-06	1.43662e-06	1.49384e-06	0	0	0	0	8.42225e-06	1.0022e-32	354.766	871.056	0.232392	0.0843458	0.651077	0.0796713	zinc finger protein 281	NM_012482.3
DNAJC15	PH_hs_0036011	145	244	342	561	0.00170259	0.00292973	9.40641e-06	3.06863e-06	0	0	0	0	8.45228e-06	3.34781e-07	192.514	451.105	0.232435	0.201208	0.65071	0.132107	DnaJ (Hsp40) homolog, subfamily C, member 15	NM_013238.2
RPS19BP1	PH_hs_0035814	2200	2145	4371	5308	5.75988e-07	6.04426e-07	4.11097e-07	3.86303e-07	0	0	0	0	3.71902e-22	1.61035e-17	2179.26	4837.85	0.104086	0.118508	0.650062	0.00869863	ribosomal protein S19 binding protein 1	NM_194326.2
ASPHD2	PH_hs_0010861	189	237	553	465	0.000388257	2.61511e-05	3.15589e-06	4.52187e-06	0	0	0	0	2.10264e-15	4.11826e-16	212.331	509.168	0.12741	0.124214	0.649843	0.0219684	aspartate beta-hydroxylase domain containing 2	NM_020437.4
SNORD43	PH_hs_0043690	69	98	193	228	0.0014385	0.000464035	4.92338e-05	2.93839e-05	-50	0	0	0	5.23376e-09	5.00018e-15	82.9839	210.439	0.174734	0.129211	0.649239	0.00649265	small nucleolar RNA, C/D box 43	NR_002439.1
MANBAL	PH_hs_0030927	349	396	866	889	8.91952e-06	6.5332e-06	1.47624e-06	1.42254e-06	0	0	0	0	6.00086e-30	6.73435e-36	372.252	877.47	0.0884343	0.0803019	0.649174	0.000241744	mannosidase, beta A, lysosomal-like	NM_001003897.1,NM_022077.3
CNOT4	PH_hs_0044433	133	149	306	360	0.000166549	0.000113715	1.26065e-05	8.24894e-06	0	0	0	0	1.55183e-23	1.12225e-16	140.951	332.906	0.100712	0.121829	0.648784	0.00439731	CCR4-NOT transcription complex, subunit 4	NM_013316.3,NM_001190849.1,NM_001190848.1,NM_001190847.1,NM_001008225.2,NM_001190850.1
MED21	PH_hs_0014800	233	408	707	778	2.75473e-05	6.08297e-06	2.02128e-06	1.73324e-06	0	0	0	0	2.22803e-07	1.74529e-24	316.931	742.38	0.198084	0.0985715	0.648763	0.0487038	mediator complex subunit 21	NM_001271811.1,NM_004264.4,NR_073464.1,NR_073463.1
CRIPT	PH_hs_0003016	98	128	253	264	0.000461437	0.000370383	2.15401e-05	1.90426e-05	0	0	0	0	6.47929e-12	3.07101e-26	112.532	258.483	0.14773	0.0949474	0.648497	0.0131379	cysteine-rich PDZ-binding protein	NM_014171.4
PCLO	PH_hs_0048832	349	387	834	942	8.92096e-06	0.410976	1.55981e-06	1.31641e-06	0	0	0	0	0.185	4.17211e-22	367.966	887.814	1.11548	0.104215	0.648382	0.163868	piccolo presynaptic cytomatrix protein	NM_014510.2
NUFIP2	PH_hs_0048136	139	241	544	363	0.00015822	2.48901e-05	3.26145e-06	8.07606e-06	0	0	0	0	4.44947e-07	2.20038e-08	187.928	453.838	0.203478	0.182683	0.647953	0.125957	nuclear fragile X mental retardation protein interacting protein 2	NM_020772.2
PTHLH	PH_hs_0005005	534	480	1188	1197	3.38476e-06	4.22423e-06	9.86833e-07	9.78545e-07	0	0	0	0	9.84485e-15	1.64863e-41	509.605	1192.5	0.130674	0.0743775	0.647803	0.0128108	parathyroid hormone-like hormone	NM_198964.1,NM_002820.2
HSPBAP1	PH_hs_0002532	1457	1597	3416	3445	7.99487e-07	7.35463e-07	4.53105e-07	4.51413e-07	0	0	0	0	2.5204e-40	7.56701e-44	1527.3	3430.49	0.0755191	0.0722676	0.647287	0.000420253	HSPB (heat shock 27kDa) associated protein 1	NM_024610.5
SLU7	PH_hs_0020409	314	290	702	768	1.17626e-05	0.00519303	4.7689e-06	0.000153523	0	0	0	0	4.67275e-11	8.96406e-20	303.348	734.889	0.154388	0.1108	0.646837	0.0635534	SLU7 splicing factor homolog (S. cerevisiae)	NM_006425.4
SMIM4	PH_hs_0042014	82	120	145	341	0.000833266	0.000233848	0.000127112	9.4662e-06	0	0	0	0	6.90705e-09	0.000303087	100.303	242.644	0.17619	0.291644	0.646026	0.207676	small integral membrane protein 4	NM_001124767.1
OR52N2	PH_hs_0042686	77	55	162	190	0.00130716	0.00287281	0.204328	0.0332878	0	-50	0	0	7.32737e-06	0.00234531	66.7126	175.951	0.230744	0.353664	0.645747	0.408149	olfactory receptor, family 52, subfamily N, member 2	NM_001005174.1
DPH1|OVCA2	PH_hs_0062200	1865	2284	4822	4323	6.47665e-07	5.61987e-07	3.97793e-07	4.12697e-07	0	0	0	0	1.89179e-24	1.86475e-23	2069.2	4573.48	0.098648	0.100898	0.645346	0.0027309	DPH1 homolog (S. cerevisiae)|ovarian tumor suppressor candidate 2	NM_001383.3|NM_080822.2
NFKBIB	PH_hs_0044317	515	546	1223	1256	3.64139e-06	3.25327e-06	9.55699e-07	9.2855e-07	0	0	0	0	1.22575e-29	5.20967e-37	531.044	1239.46	0.0889286	0.0790165	0.644646	0.000944353	nuclear factor of kappa light polypeptide gene enhancer in B-cells inhibitor, beta	NM_001243116.1,NM_002503.4,NR_040515.1
RTCA	PH_hs_0048512	529	814	1340	1777	3.44772e-06	1.61684e-06	8.67833e-07	9.76851e-07	0	0	0	0	2.04555e-10	1.42233e-12	666.058	1557.72	0.159987	0.14316	0.64453	0.035615	RNA 3'-terminal phosphate cyclase	NM_001130841.1,NM_003729.3
MARCKSL1	PH_hs_0004265	164	228	414	519	8.29529e-05	2.96782e-05	5.87927e-06	1.53057e-05	0	0	0	0	7.41573e-12	2.28206e-13	194.89	466.314	0.148158	0.138166	0.644297	0.0301635	MARCKS-like 1	NM_023009.6,NR_052852.1
CD44	PH_hs_0032595	1711	2182	3845	4804	6.93569e-07	5.78972e-07	4.31213e-07	3.98264e-07	0	0	0	0	2.19283e-20	9.17279e-16	1939.58	4322.8	0.108954	0.125754	0.643943	0.00614807	CD44 molecule (Indian blood group)	NM_001202555.1,NM_001001392.1,NM_001001391.1,NM_001001390.1,NM_001001389.1,NM_000610.3,NM_001202556.1
CDKN1A	PH_hs_0024155	1228	1455	3009	3025	9.51444e-07	4.41972e-06	4.80886e-07	4.83065e-07	0	0	0	0	2.2056e-26	2.24208e-43	1339.17	3017.01	0.0946678	0.0726776	0.643822	0.000206745	cyclin-dependent kinase inhibitor 1A (p21, Cip1)	NM_078467.2,NM_000389.4,NM_001220778.1,NM_001220777.1
USP1	PH_hs_0002857	43	100	185	244	0.00575449	0.000433126	6.28275e-05	2.39557e-05	-50	0	0	0	0.000396254	8.72812e-11	70.2558	214.395	0.298027	0.156686	0.643817	0.0203167	ubiquitin specific peptidase 1	NM_001017416.1,NM_001017415.1,NM_003368.4
TMEM38B	PH_hs_0043163	140	169	345	385	0.000139859	7.53048e-05	9.18919e-06	6.98895e-06	0	0	0	0	8.02512e-18	7.32908e-21	154.16	364.932	0.11738	0.107579	0.641853	0.00398171	transmembrane protein 38B	NM_018112.2
LRIF1	PH_hs_0002219	462	670	1172	1447	4.59092e-06	2.21431e-06	1.00215e-06	8.047e-07	0	0	0	0	4.14708e-12	6.35796e-16	562.217	1309.01	0.146341	0.125042	0.64143	0.0177302	ligand dependent nuclear receptor interacting factor 1	NM_001006945.1,NM_018372.3
C1QTNF9B-AS1	PH_hs_0060514	88	99	212	209	0.000663482	0.00203786	3.66378e-05	4.30468e-05	0	0	0	0	9.12825e-17	3.23139e-26	93.4577	210.508	0.121462	0.0949907	0.641364	0.00805557	C1QTNF9B antisense RNA 1	NM_001014442.2
CDKN1A	PH_hs_0061784	799	802	1834	1854	1.66483e-06	1.65503e-06	6.56121e-07	7.95871e-07	0	0	0	0	8.1578e-24	1.21787e-41	802.412	1843.99	0.100068	0.0742539	0.640964	0.00318241	cyclin-dependent kinase inhibitor 1A (p21, Cip1)	NM_078467.2,NM_000389.4,NM_001220778.1,NM_001220777.1
FBN2	PH_hs_0004603	343	361	802	845	0.000632355	8.19063e-06	1.65365e-06	1.53006e-06	0	0	0	0	3.74855e-20	8.54711e-31	352.425	823.432	0.109646	0.0871262	0.64089	0.00483604	fibrillin 2	NM_001999.3
FGFR1OP2|LOC100335030	PH_hs_0048957	516	592	1245	1329	3.62708e-06	2.77153e-06	9.37377e-07	8.75162e-07	0	0	0	0	2.22439e-30	7.4016e-30	553.48	1286.86	0.0877609	0.0885786	0.640466	0.0001457	FGFR1 oncogene partner 2|FGFR1 oncogene partner 2 pseudogene	NM_001171887.1,NM_015633.2|NR_033267.1
PEX19	PH_hs_0025832	93	154	257	310	0.0005497	0.000102076	2.05759e-05	1.2178e-05	0	0	0	0	3.35208e-07	7.36626e-15	122.285	283.407	0.201218	0.130042	0.639986	0.0829938	peroxisomal biogenesis factor 19	NM_002857.3,NM_001193644.1,NR_036493.1,NR_036492.1
ABCE1	PH_hs_0001128	114	178	280	317	0.000278119	0.192343	1.61246e-05	0.02014	0	0	0	0	0.00970497	2.04548e-09	144.766	298.436	0.427796	0.170054	0.639772	0.0851586	ATP-binding cassette, sub-family E (OABP), member 1	NM_001040876.1,NM_002940.2
RPS14	PH_hs_0029971	3088	4412	7301	8456	4.82797e-07	2.48327e-06	4.34358e-07	3.46237e-07	0	0	0	0	4.68826e-13	3.02895e-21	3726.28	7876.49	0.140069	0.106508	0.639695	0.00772684	ribosomal protein S14	NM_005617.3
MXI1	PH_hs_0006538	493	582	1238	1256	3.98889e-06	2.85937e-06	9.42992e-07	9.31829e-07	0	0	0	0	3.84981e-26	6.85483e-40	536.614	1246.98	0.0951398	0.0759513	0.639592	0.000265865	MAX interactor 1, dimerization protein	NM_005962.4,NM_130439.3,NM_001008541.1
HNRNPF	PH_hs_0000095	101	137	258	290	0.000417378	0.00015038	2.38716e-05	0.000628892	0	0	0	0	2.93711e-11	2.3905e-15	118.397	273.945	0.152744	0.127672	0.639296	0.0553051	heterogeneous nuclear ribonucleoprotein F	NM_001098206.1,NM_001098204.1,NM_001098205.1,NM_001098207.1,NM_001098208.1,NM_004966.3
TNIP1	PH_hs_0023969	500	503	1175	1165	3.87156e-06	3.82345e-06	9.99259e-07	1.18176e-06	0	0	0	0	8.76808e-23	2.27065e-37	502.67	1170.03	0.10251	0.0786124	0.639042	0.00353933	TNFAIP3 interacting protein 1	NM_001252393.1,NM_001252392.1,NM_006058.4,NM_001252391.1,NM_001252390.1,NM_001252386.1,NM_001252385.1,NM_001258456.1,NM_001258455.1,NM_001258454.1
RNF111	PH_hs_0028765	137	163	346	359	0.00015028	8.45711e-05	9.13019e-06	8.30629e-06	0	0	0	0	1.13755e-18	3.63144e-29	149.724	352.481	0.114381	0.0896962	0.638562	0.00244071	ring finger protein 111	NM_001270530.1,NM_001270529.1,NM_001270528.1,NM_017610.7
GAPDH	PH_hs_0060520	16862	22019	35549	41282	3.15343e-07	3.08413e-07	2.99973e-07	2.98131e-07	0	0	0	0	4.08177e-19	2.9829e-21	19360.1	38405.5	0.112895	0.106489	0.638166	0.00335516	glyceraldehyde-3-phosphate dehydrogenase	NM_002046.4
UPF2	PH_hs_0000436	194	299	546	599	4.85071e-05	1.97891e-05	3.23805e-06	2.71112e-06	0	0	0	0	2.65101e-09	4.24189e-24	244.493	572.411	0.171309	0.0994249	0.637986	0.0278156	UPF2 regulator of nonsense transcripts homolog (yeast)	NM_015542.3,NM_080599.2
KIAA1644	PH_hs_0000691	957	1452	2488	2906	3.19343e-05	8.02134e-07	5.47315e-07	5.48759e-07	0	0	0	0	1.49434e-10	3.81047e-20	1195.14	2696.27	0.158746	0.109668	0.636535	0.0204867	KIAA1644	NM_001099294.1
RAB1A	PH_hs_0012652	3329	4598	7070	9865	4.58357e-07	4.04019e-07	3.59069e-07	3.37134e-07	0	0	0	0	2.61119e-15	3.05146e-11	3941.69	8462.49	0.127854	0.152877	0.636524	0.0276802	RAB1A, member RAS oncogene family	NM_015543.1,NM_004161.4
TMEM181	PH_hs_0022239	966	941	2200	2284	1.27024e-06	0.014213	5.79717e-07	5.62492e-07	0	0	0	0	2.60757e-11	5.60547e-36	956.49	2241.88	0.152331	0.0802077	0.636272	0.0333607	transmembrane protein 181	NM_020823.1
FLRT2	PH_hs_0003424	123	171	322	363	0.00021631	7.2436e-05	2.36932e-05	8.07755e-06	0	0	0	0	3.99534e-11	2.95764e-19	146.168	342.429	0.153828	0.11244	0.636202	0.0282583	fibronectin leucine rich transmembrane protein 2	NM_013231.4
HSF2	PH_hs_0009571	175	279	451	541	6.71891e-05	1.64583e-05	0.27239	3.29602e-06	0	0	0	0	1.32432e-08	0.00934083	224.969	495.842	0.179753	0.425202	0.635644	0.0335541	heat shock transcription factor 2	NM_001135564.1,NM_004506.3
C17orf89	PH_hs_0042994	205	338	606	647	4.09281e-05	9.70656e-06	2.65108e-06	2.35464e-06	0	0	0	0	3.46772e-08	8.06273e-28	268.857	626.433	0.185431	0.0920014	0.635618	0.0415037	chromosome 17 open reading frame 89	NM_001086521.1
DHX30	PH_hs_0016101	451	716	1292	1367	4.83749e-06	1.98495e-06	9.01207e-07	8.50592e-07	0	0	0	0	1.51546e-09	2.20956e-31	578.339	1329.38	0.168636	0.0862514	0.635058	0.0247982	DEAH (Asp-Glu-Ala-His) box polypeptide 30	NM_014966.3,NM_138615.2
NANOS1	PH_hs_0017020	83	61	200	191	0.000870825	0.00211661	4.40967e-05	5.81751e-05	0	-50	0	0	2.51643e-06	4.46788e-22	72.7275	195.519	0.219134	0.104291	0.634857	0.00790299	nanos homolog 1 (Drosophila)	NM_199461.2
ZNF276	PH_hs_0049026	104	134	267	276	0.000517381	0.000161748	1.8453e-05	1.67697e-05	0	0	0	0	6.88484e-13	7.2359e-28	118.547	271.487	0.141116	0.0919179	0.634855	0.0143495	zinc finger protein 276	NM_001113525.1,NM_152287.3
SLC12A8	PH_hs_0049084	47	96	179	230	0.00450844	0.000494569	6.26071e-05	6.79021e-05	-50	0	0	0	9.65585e-05	3.84531e-11	70.4553	204.409	0.268251	0.153692	0.634274	0.019963	solute carrier family 12 (potassium/chloride transporters), member 8	NM_024628.5,NM_001195483.1
TP53INP1	PH_hs_0004332	461	478	1052	1132	4.61332e-06	4.26016e-06	1.13879e-06	1.04287e-06	0	0	0	0	5.63264e-26	2.70117e-28	470.241	1091.87	0.0954663	0.0911682	0.634068	0.00196552	tumor protein p53 inducible nuclear protein 1	NM_001135733.1,NM_033285.3
SHISA5	PH_hs_0033239	304	362	724	836	1.28275e-05	8.13386e-06	1.9434e-06	1.55386e-06	0	0	0	0	4.23212e-23	6.5996e-20	332.38	779.805	0.101742	0.110391	0.633807	0.00195299	shisa homolog 5 (Xenopus laevis)	NM_001272083.1,NM_001272082.1,NM_001272068.1,NM_001272067.1,NM_001272066.1,NM_001272065.1,NM_016479.4
LOC100506548	PH_hs_0061734	372	448	1051	867	7.60134e-06	4.91259e-06	1.14005e-06	1.47381e-06	0	0	0	0	8.0294e-23	7.22138e-16	409.122	959.35	0.102416	0.125288	0.633689	0.0139614	uncharacterized LOC100506548	NR_037665.1
YPEL5	PH_hs_0010870	1360	1826	3508	3508	8.54952e-07	6.58317e-07	4.48825e-07	4.47873e-07	0	0	0	0	1.51304e-16	3.90962e-42	1585.33	3508.05	0.122365	0.0737954	0.633374	0.00226311	yippee-like 5 (Drosophila)	NM_001127401.1,NM_001127400.1,NM_001127399.1,NM_016061.2
CHIC2	PH_hs_0023299	108	149	270	354	0.000333769	0.000113674	1.78493e-05	0.00844384	0	0	0	0	5.59154e-11	1.46276e-07	127.796	311.85	0.155038	0.195001	0.632985	0.145742	cysteine-rich hydrophobic domain 2	NM_012110.3
PLA2G1B	PH_hs_0028693	259	417	740	809	2.01186e-05	5.78099e-06	0.00235628	1.65226e-06	0	0	0	0	7.87749e-09	1.28863e-16	334.898	774.384	0.176893	0.122076	0.632958	0.0991141	phospholipase A2, group IB (pancreas)	NM_000928.2
RAF1	PH_hs_0048162	763	936	1824	2050	1.83995e-06	1.32457e-06	6.58991e-07	1.73208e-06	0	0	0	0	5.65519e-23	7.0132e-23	847.294	1936.61	0.102046	0.102273	0.632954	0.00142464	v-raf-1 murine leukemia viral oncogene homolog 1	NM_002880.3
GPN1	PH_hs_0044349	2907	3848	6644	7657	4.89833e-07	4.31075e-07	3.64198e-07	3.53018e-07	0	0	0	0	8.00757e-18	8.92631e-22	3362.41	7148.74	0.117377	0.105077	0.632873	0.00375862	GPN-loop GTPase 1	NM_001145049.1,NM_001145048.1,NM_001145047.1,NM_007266.3,NR_026735.1
FAM134C	PH_hs_0020053	708	1065	1713	2345	2.01668e-06	1.12164e-06	6.92945e-07	5.57004e-07	0	0	0	0	3.05147e-11	1.20998e-11	879.796	2027.87	0.152877	0.149742	0.632545	0.0357744	family with sequence similarity 134, member C	NM_178126.3,NR_026697.1
TMEM199	PH_hs_0024087	621	807	1609	1646	2.5341e-06	1.63974e-06	7.33486e-07	7.16462e-07	0	0	0	0	8.06183e-18	1.21087e-38	711.133	1627.45	0.117388	0.0772339	0.631561	0.00176701	transmembrane protein 199	NM_152464.1
KLF16	PH_hs_0029197	95	154	243	330	0.000581858	0.000102215	2.42408e-05	1.03319e-05	0	0	0	0	1.7329e-07	1.8205e-10	123.337	286.344	0.196226	0.159523	0.631518	0.0971582	Kruppel-like factor 16	NM_031918.3
NIPAL3	PH_hs_0048561	111	127	277	266	0.000303976	0.000194631	1.65995e-05	1.86261e-05	0	0	0	0	5.43744e-20	5.14442e-25	118.896	271.524	0.110134	0.0974325	0.631276	0.00608111	NIPA-like domain containing 3	NM_020448.4
MCL1	PH_hs_0004861	3089	4037	7292	7693	4.74993e-07	4.23212e-07	3.56658e-07	3.52754e-07	0	0	0	0	9.41052e-19	7.81421e-34	3548.2	7491.87	0.114101	0.0828653	0.63079	0.00134314	myeloid cell leukemia sequence 1 (BCL2-related)	NM_001197320.1,NM_182763.2,NM_021960.4
RNF40	PH_hs_0043074	312	479	1033	801	1.19643e-05	8.55372e-06	1.16509e-06	1.65677e-06	0	0	0	0	7.3606e-10	6.56969e-13	392.316	917.438	0.165361	0.140987	0.63074	0.0505286	ring finger protein 40, E3 ubiquitin protein ligase	NM_014771.3,NM_001207034.1,NM_001207033.1
RPL36AL	PH_hs_0042078	5856	7609	12908	14607	3.75876e-07	3.53475e-07	1.65111e-06	3.1998e-07	0	0	0	0	2.27064e-19	8.1933e-23	6705.49	13754.6	0.112071	0.102438	0.630572	0.00303987	ribosomal protein L36a-like	NM_001001.3
ZNF777	PH_hs_0047423	197	246	498	501	5.44566e-05	0.236071	9.43139e-06	3.85777e-06	0	0	0	0	0.00671725	3.73456e-35	220.828	499.501	0.404524	0.0811981	0.629882	0.180551	zinc finger protein 777	NM_015694.2
SPSB1	PH_hs_0047919	107	161	308	357	0.115178	8.81008e-05	1.24152e-05	8.42268e-06	0	0	0	0	0.000101336	1.26742e-17	132.986	332.415	0.269131	0.118116	0.629712	0.151515	splA/ryanodine receptor domain and SOCS box containing 1	NM_025106.3
GRPEL1	PH_hs_0029233	2196	2266	4906	4804	5.76525e-07	5.64833e-07	3.95621e-07	3.98267e-07	0	0	0	0	3.96204e-29	2.75951e-37	2234.79	4855.25	0.0897587	0.0787067	0.629578	0.00211724	GrpE-like 1, mitochondrial (E. coli)	NM_025196.2
RNF213	PH_hs_0048408	141	189	382	387	0.000142692	5.24978e-05	7.1232e-06	6.90125e-06	0	0	0	0	1.08152e-12	7.16708e-34	164.212	384.496	0.142378	0.0828164	0.629291	0.0137312	ring finger protein 213	NM_020954.3
NRL	PH_hs_0031397	211	143	422	413	3.71743e-05	0.000130312	6.65096e-06	5.91744e-06	0	0	0	0	1.44441e-06	4.15261e-30	179.135	417.522	0.213741	0.0881827	0.629214	0.110162	neural retina leucine zipper	NM_006177.3
ARHGEF7	PH_hs_0046510	124	162	277	340	0.000209689	8.65694e-05	0.395317	9.61458e-06	0	0	0	0	3.01832e-13	0.13342	142.407	308.389	0.138896	0.900601	0.629062	0.0123951	Rho guanine nucleotide exchange factor (GEF) 7	NM_001113513.1,NM_003899.3
RPS6KA2	PH_hs_0047240	552	614	1311	1375	3.16891e-06	2.63989e-06	8.87509e-07	8.45659e-07	0	0	0	0	2.01323e-36	5.80979e-33	582.901	1342.9	0.0796877	0.0840228	0.628477	0.000313256	ribosomal protein S6 kinase, 90kDa, polypeptide 2	NM_001006932.1,NM_021135.4
CBX6	PH_hs_0026686	373	509	863	1059	7.55198e-06	3.73082e-06	0.0716251	1.12947e-06	0	0	0	0	2.87999e-14	1.44597e-06	438.703	960.654	0.133095	0.213751	0.628468	0.140967	chromobox homolog 6	NM_014292.3
ST3GAL6	PH_hs_0025815	163	232	385	518	8.46176e-05	0.000251823	0.000576826	3.59768e-06	0	0	0	0	3.89416e-10	4.77786e-10	196.269	451.262	0.162623	0.163488	0.628317	0.0758585	ST3 beta-galactoside alpha-2,3-sialyltransferase 6	NM_001271148.1,NM_001271147.1,NM_001271146.1,NM_001271145.1,NM_001271142.1,NM_006100.3
SH3PXD2B	PH_hs_0042211	477	662	1271	1331	4.27871e-06	2.26093e-06	9.16887e-07	8.7381e-07	0	0	0	0	7.30037e-14	3.58229e-33	566.299	1300.91	0.135304	0.0837394	0.62819	0.00650846	SH3 and PX domains 2B	NM_001017995.2
PCGF1	PH_hs_0015967	151	258	401	551	0.000119771	2.03422e-05	6.33767e-06	3.1821e-06	0	0	0	0	2.38892e-07	9.98221e-11	202.339	475.732	0.198609	0.157193	0.627345	0.0903388	polycomb group ring finger 1	NM_032673.2
IL36RN	PH_hs_0040322	1526	1727	3712	3473	7.65853e-07	6.90035e-07	4.37365e-07	4.49944e-07	0	0	0	0	1.18963e-36	1.01332e-28	1625.52	3592.99	0.0794245	0.0904401	0.627047	0.00160667	interleukin 36 receptor antagonist	NM_173170.1,NM_012275.2
BCAT1	PH_hs_0047859	131	121	291	287	0.000174547	0.000227664	1.44639e-05	1.5031e-05	0	0	0	0	2.42589e-12	5.03584e-29	126.562	289.011	0.144721	0.0899313	0.624551	0.0233958	branched chain amino-acid transaminase 1, cytosolic	NM_001178094.1,NM_001178093.1,NM_001178092.1,NM_001178091.1,NM_005504.6
RPL39	PH_hs_0032564	9735	16659	24378	27546	5.18085e-07	3.15705e-07	3.06248e-07	3.05216e-07	0	0	0	0	1.57023e-08	5.52278e-24	13057.1	25956.5	0.18072	0.0996828	0.623403	0.0400289	ribosomal protein L39	NM_001000.2
RNF183	PH_hs_0061000	80	52	172	201	0.00348641	0.0703455	7.10598e-05	4.3329e-05	0	-50	0	0	0.000447999	3.74922e-15	66.8622	186.449	0.301087	0.128604	0.623027	0.0172177	ring finger protein 183	NM_145051.3
PIGY|PYURF	PH_hs_0046209	81	120	202	247	0.000863704	0.000236857	4.2574e-05	2.3132e-05	0	0	0	0	1.24959e-08	1.33481e-13	99.7767	224.421	0.179426	0.136797	0.62256	0.0611921	phosphatidylinositol glycan anchor biosynthesis, class Y|PIGY upstream reading frame	NM_001042616.2|NM_032906.4
NR3C1	PH_hs_0044685	1016	1189	2560	2385	1.18999e-06	9.85966e-07	5.24369e-07	5.46961e-07	0	0	0	0	1.46495e-29	8.61999e-28	1100.92	2472.85	0.0890532	0.092053	0.621758	0.00182972	nuclear receptor subfamily 3, group C, member 1 (glucocorticoid receptor)	NM_001020825.1,NM_001018077.1,NM_001018076.1,NM_001018075.1,NM_001018074.1,NM_000176.2,NM_001204264.1,NM_001204263.1,NM_001204262.1,NM_001204261.1,NM_001204260.1,NM_001204259.1,NM_001204258.1,NM_001024094.1
CCDC59	PH_hs_0005050	746	1058	1974	2041	1.85152e-06	1.13073e-06	6.46809e-07	0.0815902	0	0	0	0	2.22464e-13	1.49247e-07	896.457	2007.4	0.1381	0.195145	0.621748	0.142545	coiled-coil domain containing 59	NM_014167.4,NR_033192.1
CNN1	PH_hs_0001829	79	91	184	187	0.00108302	0.0455335	5.71942e-05	5.44313e-05	0	0	0	0	1.73224e-08	6.95801e-27	84.9117	185.497	0.181285	0.0937122	0.62135	0.0640739	calponin 1, basic, smooth muscle	NM_001299.4
NOMO2|NOMO3|LOC101060373|NOMO1	PH_hs_0062277	4693	7993	11256	14443	4.01295e-07	3.49985e-07	3.30514e-07	3.20387e-07	0	0	0	0	1.27563e-08	1.60702e-14	6276.44	12843.8	0.179542	0.131763	0.621311	0.0510939	NODAL modulator 2|NODAL modulator 3|nodal modulator 1-like|NODAL modulator 1	NM_173614.2,NM_001004060.1|NM_001004067.3|XM_003960648.1|NM_014287.3
ATG4D	PH_hs_0026879	149	183	383	390	0.000114416	5.84085e-05	7.08601e-06	1.29589e-05	0	0	0	0	4.5488e-17	6.31629e-32	165.564	386.492	0.12025	0.0854646	0.621235	0.00541402	autophagy related 4D, cysteine peptidase	NM_032885.4
INSR	PH_hs_0049088	2	78	163	157	0.458745	0.000984337	8.47813e-05	9.57307e-05	-50	0	0	0	0.0701933	1.42248e-21	38.2037	160.013	0.678264	0.105616	0.62107	0.0131282	insulin receptor	NM_001079817.1,NM_000208.2
UBC|UBA52	PH_hs_0030809	9661	14327	25152	22513	3.38276e-07	3.20684e-07	3.05629e-07	3.07921e-07	0	0	0	0	2.58508e-12	1.29346e-23	11907.4	23837.7	0.14491	0.100528	0.62082	0.0163425	ubiquitin C|ubiquitin A-52 residue ribosomal protein fusion product 1	NM_021009.5|NM_003333.3,NM_001033930.1
ATP2B1	PH_hs_0022028	261	316	644	709	0.0296409	1.15614e-05	2.38552e-06	2.01262e-06	0	0	0	0	4.9605e-10	3.47202e-24	287.844	676.39	0.163648	0.0992305	0.620369	0.0365694	ATPase, Ca++ transporting, plasma membrane 1	NM_001001323.1,NM_001682.2
PSEN1	PH_hs_0027047	4103	5319	9617	9754	4.20602e-07	3.8977e-07	3.38529e-07	3.37762e-07	0	0	0	0	1.85072e-19	3.68541e-43	4692.36	9685.38	0.111788	0.0728692	0.620057	0.00128738	presenilin 1	NM_000021.3,NM_007318.2
PLK3	PH_hs_0009238	677	848	1725	1720	2.2061e-06	1.52188e-06	6.88953e-07	9.01329e-07	0	0	0	0	8.83098e-21	1.19916e-39	760.128	1722.53	0.10781	0.0761961	0.619751	0.00121446	polo-like kinase 3	NM_004073.2
KATNBL1	PH_hs_0022353	893	983	2127	2100	1.41329e-06	1.2411e-06	5.89014e-07	6.00014e-07	0	0	0	0	1.1577e-39	4.24711e-38	938.084	2113.58	0.0761806	0.0778152	0.61963	0.00103625	katanin p80 subunit B-like 1	NM_024713.2
GORAB	PH_hs_0010829	262	304	598	715	1.95888e-05	0.000233757	0.000968298	0.000104804	0	0	0	0	2.96028e-21	4.58789e-12	282.655	656.294	0.10648	0.146652	0.619461	0.0340297	golgin, RAB6-interacting	NM_152281.2,NR_027397.1
FEM1A	PH_hs_0029824	395	471	961	1027	6.57163e-06	4.39974e-06	1.2786e-06	1.1736e-06	0	0	0	0	4.23287e-24	4.3281e-29	432.179	993.892	0.0994228	0.0898222	0.619394	0.000450471	fem-1 homolog a (C. elegans)	NM_018708.2
TSPYL2	PH_hs_0027850	88	103	210	212	0.000659397	0.000390489	3.77226e-05	0.000774437	0	0	0	0	1.25928e-16	4.01473e-23	95.3629	210.999	0.122035	0.101687	0.618894	0.0241228	TSPY-like 2	NM_022117.3
VHLL	PH_hs_0034773	582	446	1156	1225	2.85919e-06	5.2616e-06	1.0182e-06	2.98149e-05	0	0	0	0	2.19876e-09	1.95884e-26	518.668	1190.39	0.170401	0.0945682	0.618766	0.0763732	von Hippel-Lindau tumor suppressor-like	NM_001004319.2
PES1	PH_hs_0022478	347	438	887	914	9.05227e-06	5.16349e-06	1.42673e-06	1.36861e-06	0	0	0	0	1.34276e-18	3.26057e-35	391.205	900.463	0.114626	0.081126	0.618415	0.00178649	pescadillo ribosomal biogenesis factor 1	NM_001243225.1,NM_014303.3,NR_036550.2
RRP15	PH_hs_0003659	2020	2704	5157	4934	6.10627e-07	5.08501e-07	3.89602e-07	3.94913e-07	0	0	0	0	6.03266e-17	1.26574e-32	2350.8	5045.98	0.120737	0.0844853	0.618006	0.00407208	ribosomal RNA processing 15 homolog (S. cerevisiae)	NM_016052.3
DOK3	PH_hs_0046179	143	161	350	356	0.00013037	8.90726e-05	8.8608e-06	8.48454e-06	0	0	0	0	1.0338e-23	1.8181e-32	151.928	352.994	0.100303	0.084703	0.617693	0.00176221	docking protein 3	NM_001144876.1,NM_001144875.1
HIGD2A	PH_hs_0046527	1385	2522	3824	4504	8.41517e-07	5.28952e-07	4.32156e-07	4.06848e-07	0	0	0	0	2.02465e-07	1.02474e-19	1929.99	4162.81	0.19737	0.110981	0.61765	0.0609714	HIG1 hypoxia inducible domain family, member 2A	NM_138820.2
TBC1D12	PH_hs_0044819	64	83	159	183	0.00363476	0.000798724	9.18806e-05	5.82212e-05	-50	0	0	0	2.68016e-10	1.29305e-15	73.2085	170.958	0.161078	0.126432	0.617301	0.00847893	TBC1 domain family, member 12	NM_015188.1
LIMS1	PH_hs_0061933	6928	8509	15342	15853	3.93285e-07	3.45833e-07	3.18311e-07	3.17247e-07	0	0	0	0	9.02586e-25	1.5833e-38	7698.23	15596.8	0.0979518	0.0773571	0.617183	0.000241978	LIM and senescent cell antigen-like domains 1	NM_001193488.1,NM_001193484.1,NM_001193482.1,NM_001193485.2,NM_004987.5,NM_001193483.2
ADNP	PH_hs_0026205	84	116	187	228	0.000768544	0.000265703	0.443481	2.93364e-05	0	0	0	0	3.43637e-10	0.271058	99.4501	207.428	0.162101	1.64038	0.617156	0.0329985	activity-dependent neuroprotector homeobox	NM_181442.1,NM_015339.2
ID4	PH_hs_0024544	146	202	384	419	0.000124384	4.25862e-05	5.05839e-05	5.75907e-06	0	0	0	0	1.01911e-11	1.33851e-21	173.035	401.441	0.149181	0.105545	0.617145	0.0303124	inhibitor of DNA binding 4, dominant negative helix-loop-helix protein	NM_001546.3
TFDP2	PH_hs_0043079	82	130	218	257	0.00156908	0.000179611	3.36195e-05	2.05713e-05	0	0	0	0	1.99856e-07	1.53279e-15	105.066	237.432	0.197274	0.126772	0.617132	0.0851156	transcription factor Dp-2 (E2F dimerization partner 2)	NM_001178142.1,NM_001178141.1,NM_001178140.1,NM_001178139.1,NM_001178138.1,NM_006286.4
RPL10A	PH_hs_0034466	8576	13164	20140	22979	3.45337e-07	3.23823e-07	3.10513e-07	3.07476e-07	0	0	0	0	3.68378e-11	6.22474e-23	10782.5	21554.6	0.15354	0.102147	0.617005	0.0190335	ribosomal protein L10a	NM_007104.4
NMB	PH_hs_0024396	9095	9548	18722	18938	3.41751e-07	3.3893e-07	3.12386e-07	3.12081e-07	0	0	0	0	5.16735e-33	3.50325e-44	9333.34	18829.9	0.0839539	0.07198	0.616997	0.00139579	neuromedin B	NM_205858.1,NM_021077.3
CACUL1	PH_hs_0047845	332	423	778	964	1.01474e-05	5.59262e-06	1.88153e-06	1.27355e-06	0	0	0	0	7.92519e-18	2.36749e-15	376.167	870.671	0.11736	0.127653	0.616709	0.00967874	CDK2-associated, cullin domain 1	NM_153810.4
DIAPH2	PH_hs_0045562	72	103	150	238	0.00195639	0.000390604	0.000111579	2.57913e-05	0	0	0	0	8.3366e-09	4.58227e-07	86.944	193.841	0.177198	0.203717	0.616316	0.114012	diaphanous homolog 2 (Drosophila)	NM_007309.3
WDR3	PH_hs_0022987	488	688	1328	1331	4.0751e-06	2.116e-06	8.75908e-07	1.96843e-06	0	0	0	0	3.1626e-13	2.74391e-39	584.471	1329.51	0.139019	0.0765628	0.616017	0.0111214	WD repeat domain 3	NM_006784.2
KCTD5	PH_hs_0003931	804	1089	2013	2209	1.64819e-06	1.09172e-06	6.12093e-07	5.74282e-07	0	0	0	0	1.2501e-15	1.28826e-26	941.741	2110.67	0.126365	0.0942188	0.615844	0.00414261	potassium channel tetramerisation domain containing 5	NM_018992.3
DCP1A	PH_hs_0008362	342	383	814	857	9.50577e-06	7.08307e-06	1.61734e-06	1.49868e-06	0	0	0	0	6.27307e-32	5.74305e-31	362.377	835.432	0.0854603	0.0868663	0.615358	0.000515926	DCP1 decapping enzyme homolog A (S. cerevisiae)	NM_018403.5
NRAS	PH_hs_0013620	231	295	622	597	0.000326122	1.3928e-05	2.52749e-06	2.7645e-06	0	0	0	0	5.89792e-15	3.93233e-29	262.057	609.554	0.129563	0.0897533	0.615215	0.0105446	neuroblastoma RAS viral (v-ras) oncogene homolog	NM_002524.4
MLLT4	PH_hs_0047503	111	128	270	269	0.000304412	0.000188842	1.78508e-05	1.80694e-05	0	0	0	0	2.12682e-19	5.08254e-30	119.373	269.505	0.11198	0.0883205	0.614716	0.00505696	myeloid/lymphoid or mixed-lineage leukemia (trithorax homolog, Drosophila); translocated to, 4	NM_001040000.2
RCHY1	PH_hs_0003386	152	211	382	458	0.000106432	3.71693e-05	7.12088e-06	4.69569e-06	0	0	0	0	1.00687e-11	4.11445e-16	180.479	419.866	0.149142	0.124212	0.61468	0.0259895	ring finger and CHY zinc finger domain containing 1, E3 ubiquitin protein ligase	NM_001009922.2,NM_001008925.2,NM_015436.3,NR_037914.1,NR_037913.1
ULBP2	PH_hs_0013269	351	446	879	943	8.79291e-06	4.96635e-06	1.44513e-06	1.31166e-06	0	0	0	0	3.66358e-18	2.70974e-28	397.12	910.895	0.116148	0.0911706	0.613439	0.00215654	UL16 binding protein 2	NM_025217.2
FBXO8	PH_hs_0004439	575	888	1686	1659	0.00339481	1.42448e-06	7.02209e-07	7.11695e-07	0	0	0	0	1.966e-08	7.23771e-37	725.509	1672.57	0.182021	0.0791782	0.612852	0.0491684	F-box protein 8	NM_012180.2
ZFYVE27	PH_hs_0015225	2043	2356	4589	4860	6.05905e-07	5.51166e-07	4.0429e-07	3.96792e-07	0	0	0	0	2.1621e-33	7.45601e-33	2197.15	4724.07	0.0834465	0.0841701	0.612363	0.000153874	zinc finger, FYVE domain containing 27	NM_001174122.1,NM_001174121.1,NM_001174120.1,NM_001174119.1,NM_001002262.3,NM_144588.6,NM_001002261.3
RBPMS	PH_hs_0048194	195	277	528	555	4.75471e-05	1.65993e-05	3.51691e-06	3.13509e-06	0	0	0	0	1.50574e-11	1.62438e-29	234.541	541.458	0.150466	0.0891257	0.611694	0.0180353	RNA binding protein with multiple splicing	NM_001008711.1,NM_001008710.1,NM_006867.2
BAGE2|BAGE4|BAGE3|BAGE5	PH_hs_0062274	101	164	273	326	0.000419679	8.50633e-05	1.72953e-05	1.1778e-05	0	0	0	0	1.42333e-07	1.78612e-15	131.258	299.407	0.194805	0.127079	0.611217	0.088703	B melanoma antigen family, member 2|B melanoma antigen family, member 4|B melanoma antigen family, member 3|B melanoma antigen family, member 5	NM_182482.2|NM_181704.1|NM_182481.1|NM_182484.1
PEA15	PH_hs_0011496	1161	1301	2726	2726	1.01281e-06	9.55149e-07	5.06249e-07	5.06249e-07	0	0	0	0	4.96766e-38	9.35086e-42	1230.56	2726.04	0.0778887	0.0741465	0.61108	0.000616525	phosphoprotein enriched in astrocytes 15	NM_003768.3
TBC1D15	PH_hs_0039971	81	129	227	237	0.0011415	0.000184719	2.98433e-05	0.435985	0	0	0	0	1.95349e-07	0.264589	104.063	231.985	0.197105	1.58916	0.610978	0.078143	TBC1 domain family, member 15	NM_001146213.1,NM_022771.4,NM_001146214.1,NR_027449.1
IQCF1	PH_hs_0024348	1	91	187	190	0.486035	0.000591437	5.43874e-05	5.1693e-05	-50	0	0	0	0.081621	4.4773e-27	43.8694	188.497	0.717231	0.0933545	0.610943	0.00621342	IQ motif containing F1	NM_152397.2
OLIG2	PH_hs_0010524	83	90	183	195	0.00159374	0.000612411	6.28542e-05	4.75974e-05	0	0	0	0	2.93299e-17	1.21594e-21	86.5401	188.981	0.119504	0.105433	0.610851	0.00792751	oligodendrocyte lineage transcription factor 2	NM_005806.3
CEBPA	PH_hs_0004394	119	120	276	263	0.000272414	0.000236921	1.75651e-05	1.93862e-05	0	0	0	0	5.19347e-16	5.07796e-24	119.772	269.527	0.124654	0.0996005	0.610751	0.014106	CCAAT/enhancer binding protein (C/EBP), alpha	NM_004364.3
MTMR3	PH_hs_0024915	430	447	950	1062	5.38624e-06	1.13001e-05	1.36708e-06	1.12845e-06	0	0	0	0	3.36347e-25	2.38801e-23	439.164	1005.81	0.0970454	0.101151	0.610626	0.00419595	myotubularin related protein 3	NM_153051.2,NM_153050.2,NM_021090.3
HPCAL1	PH_hs_0000422	2897	3819	6224	7876	4.93718e-07	4.33549e-07	3.70013e-07	3.5101e-07	0	0	0	0	4.20468e-18	3.66708e-15	3343.34	7047.07	0.116362	0.128558	0.610592	0.0130322	hippocalcin-like 1	NM_001258359.1,NM_001258358.1,NM_001258357.1,NM_134421.2,NM_002149.3
ZMYND11	PH_hs_0047949	891	1039	1994	2333	1.41774e-06	1.15661e-06	6.16284e-07	5.55038e-07	0	0	0	0	8.7983e-30	6.0157e-20	963.704	2162.91	0.0886981	0.110268	0.610414	0.00217721	zinc finger, MYND-type containing 11	NM_001202466.1,NM_001202465.1,NM_001202464.1,NM_006624.5
SERF1A|SERF1B	PH_hs_0045877	48	104	172	268	0.0179044	0.000382142	7.10531e-05	2.02163e-05	-50	0	0	0	0.000274693	2.07179e-07	74.7919	219.827	0.289398	0.197541	0.609804	0.0668708	small EDRK-rich factor 1A (telomeric)|small EDRK-rich factor 1B (centromeric)	NM_022968.1|NM_001178087.1
CACNA2D2	PH_hs_0061150	141	108	275	275	0.000136572	0.000352717	1.72825e-05	0.375806	0	0	0	0	9.13757e-08	0.103109	125.632	275.004	0.191715	0.791119	0.609767	0.0852053	calcium channel, voltage-dependent, alpha 2/delta subunit 2	NM_001005505.1,NM_001174051.1,NM_006030.2
ZC3H12D	PH_hs_0033753	102	107	213	241	0.000404137	0.000343897	0.0632935	2.74651e-05	0	0	0	0	1.07952e-17	1.80633e-07	104.635	226.952	0.117856	0.196529	0.609253	0.161954	zinc finger CCCH-type containing 12D	NM_207360.2
ARL8B	PH_hs_0023390	4739	5546	10523	10484	4.00023e-07	3.81483e-07	3.33794e-07	3.33957e-07	0	0	0	0	1.49393e-31	4.97741e-42	5135.14	10503.7	0.0860032	0.0738922	0.608917	0.000194583	ADP-ribosylation factor-like 8B	NM_018184.2
RAP1B	PH_hs_0027411	11942	13904	23574	28122	3.27854e-07	3.21811e-07	3.06939e-07	3.5381e-06	0	0	0	0	7.86192e-33	1.17843e-17	12906.1	25840	0.0842016	0.117998	0.608637	0.00701193	RAP1B, member of RAS oncogene family	NM_001251922.1,NM_001251921.1,NM_001251918.1,NM_001251917.1,NM_001010942.2,NM_015646.5
RPS3A	PH_hs_0029871	177	278	399	802	6.47703e-05	1.64332e-05	6.41378e-06	0.000177803	0	0	0	0	6.65003e-09	8.98914e-05	225.546	599.769	0.175989	0.266962	0.608618	0.220512	ribosomal protein S3A	NM_001006.4
TNFRSF9	PH_hs_0036356	317	327	713	774	1.14778e-05	1.0584e-05	1.99363e-06	1.74669e-06	0	0	0	0	1.27772e-23	3.8969e-26	322.55	743.398	0.100516	0.0951502	0.608308	0.00389488	tumor necrosis factor receptor superfamily, member 9	NM_001561.5
CLPX	PH_hs_0035534	347	462	885	954	9.05334e-06	4.58915e-06	1.4313e-06	1.2911e-06	0	0	0	0	2.44416e-15	1.23225e-27	402.636	919.386	0.127718	0.0923307	0.608237	0.00522742	ClpX caseinolytic peptidase X homolog (E. coli)	NM_006660.3
AHR	PH_hs_0027923	243	290	642	586	2.44901e-05	3.95175e-05	2.55197e-06	7.77936e-06	0	0	0	0	8.65782e-21	4.19666e-22	265.989	614.111	0.107785	0.104221	0.608106	0.00825075	aryl hydrocarbon receptor	NM_001621.4
TMTC4	PH_hs_0010360	100	184	307	332	0.000434508	5.72213e-05	1.25419e-05	7.3806e-05	0	0	0	0	3.83195e-06	3.7562e-21	140.257	319.458	0.223495	0.106766	0.608038	0.146185	transmembrane and tetratricopeptide repeat containing 4	NM_032813.2,NM_001079669.1
ETF1	PH_hs_0004457	1932	2804	4856	5149	6.37395e-07	4.98618e-07	3.96899e-07	3.89785e-07	0	0	0	0	6.60167e-13	1.13961e-32	2352.13	5002.03	0.141001	0.0844225	0.607548	0.0100294	eukaryotic translation termination factor 1	NM_004730.3,NR_045994.1,NR_045992.1
RRM2	PH_hs_0049279	1397	1929	2839	4657	8.32506e-07	6.31437e-07	4.9537e-07	4.02327e-07	0	0	0	0	5.1698e-15	1.16305e-07	1653.86	3744.72	0.129282	0.193379	0.607468	0.0780137	ribonucleotide reductase M2	NM_001165931.1,NM_001034.3
FOLR1	PH_hs_0004211	92	109	211	218	0.00224688	0.471015	3.71719e-05	3.37279e-05	0	0	0	0	0.389894	4.67147e-26	100.325	214.49	3.57658	0.0953053	0.607462	0.00551609	folate receptor 1 (adult)	NM_016729.2,NM_016724.2,NM_016725.2,NM_000802.3
RPL17	PH_hs_0024237	2399	2436	5046	5275	5.44996e-07	5.39947e-07	3.92182e-07	4.00235e-07	0	0	0	0	6.39329e-27	2.06524e-35	2422.58	5160.15	0.0936432	0.0808848	0.607077	0.0028861	ribosomal protein L17	NM_000985.4,NM_001199343.1,NM_001199342.1,NM_001199340.1
ATXN1L	PH_hs_0039439	162	234	429	479	8.63287e-05	2.71375e-05	5.41452e-06	4.24005e-06	0	0	0	0	1.07853e-10	1.45448e-21	196.696	453.914	0.157487	0.105642	0.6068	0.0273789	ataxin 1-like	NM_001137675.3
SNHG8	PH_hs_0015323	1984	2436	4661	4772	6.18658e-07	5.40112e-07	4.022e-07	3.99149e-07	0	0	0	0	3.25578e-24	3.79138e-40	2204.21	4716.36	0.0991684	0.0756946	0.606728	0.000436832	small nucleolar RNA host gene 8 (non-protein coding)	NR_034010.1,NR_003584.3
SLC9B2	PH_hs_0021617	282	314	678	695	2.24144e-05	1.1762e-05	2.16949e-06	2.08006e-06	0	0	0	0	8.14428e-31	4.03247e-35	297.942	686.478	0.0870945	0.0812389	0.606212	0.00111646	solute carrier family 9, subfamily B (NHA2, cation proton antiporter 2), member 2	NM_178833.4
XRN2	PH_hs_0013738	104	173	267	332	0.000378708	0.00381187	1.84569e-05	1.01601e-05	0	0	0	0	5.85492e-06	1.42556e-13	137.123	299.385	0.228158	0.136963	0.605932	0.12441	5'-3' exoribonuclease 2	NM_012255.3
SERPINB8	PH_hs_0045586	1347	1642	3186	3322	8.6445e-07	7.17993e-07	4.68659e-07	4.68228e-07	0	0	0	0	1.29061e-24	1.49508e-35	1490.85	3253.79	0.0982864	0.0807155	0.605766	0.000296448	serpin peptidase inhibitor, clade B (ovalbumin), member 8	NM_001031848.1
FAM168B	PH_hs_0061390	137	159	322	358	0.000153294	9.20562e-05	1.10776e-05	8.37277e-06	0	0	0	0	1.56855e-20	6.47826e-21	147.819	339.939	0.108529	0.107428	0.605388	0.00423687	family with sequence similarity 168, member B	NM_001009993.2
HIST1H2BK	PH_hs_0013112	140	188	356	393	0.000141212	0.000266541	8.48286e-06	6.6554e-06	0	0	0	0	1.06452e-11	5.87869e-22	163.21	374.437	0.149323	0.104601	0.604865	0.0177101	histone cluster 1, H2bk	NM_080593.2
RAB23	PH_hs_0005181	176	303	542	538	6.60131e-05	1.29475e-05	3.2838e-06	3.33283e-06	0	0	0	0	2.13257e-07	2.18765e-34	236.927	540.015	0.197756	0.0821549	0.604743	0.0710242	RAB23, member RAS oncogene family	NM_183227.1,NM_016277.3
RAE1	PH_hs_0024189	6514	6525	12926	13529	3.76434e-07	3.6576e-07	3.24545e-07	3.22771e-07	0	0	0	0	1.0104e-25	1.24851e-35	6535.41	13226.6	0.0959742	0.0806215	0.604594	0.00422935	RAE1 RNA export 1 homolog (S. pombe)	NM_003610.3,NM_001015885.1
TIMM10	PH_hs_0042416	594	878	1522	1760	2.75106e-06	1.44751e-06	7.67776e-07	6.77849e-07	0	0	0	0	1.10782e-11	9.88808e-21	730.743	1640.59	0.149453	0.10795	0.604401	0.0193199	translocase of inner mitochondrial membrane 10 homolog (yeast)	NM_012456.2
DNAJB14	PH_hs_0048976	183	262	482	535	5.83391e-05	1.94565e-05	4.18663e-06	3.37038e-06	0	0	0	0	3.4822e-11	1.70828e-22	221.082	508.41	0.153341	0.103229	0.60371	0.0234253	DnaJ (Hsp40) homolog, subfamily B, member 14	NM_001031723.2
TCEB3	PH_hs_0043245	371	435	880	955	7.6524e-06	5.24588e-06	1.44313e-06	1.28957e-06	0	0	0	0	8.96125e-26	1.01944e-26	402.404	917.375	0.0958692	0.0940254	0.603654	0.000662966	transcription elongation factor B (SIII), polypeptide 3 (110kDa, elongin A)	NM_003198.2
HSPA6|HSPA7	PH_hs_0049600	205	188	445	468	4.06487e-05	5.61449e-05	4.98349e-06	4.46128e-06	0	0	0	0	1.60646e-13	1.23595e-28	197.412	456.464	0.137265	0.0905862	0.603609	0.0212764	heat shock 70kDa protein 6 (HSP70B')|heat shock 70kDa protein 7 (HSP70B)	NM_002155.3|NR_024151.1
SRGAP1	PH_hs_0049442	287	433	806	819	1.50296e-05	5.30065e-06	1.6412e-06	1.60213e-06	0	0	0	0	2.11074e-10	8.15277e-38	357.252	812.487	0.160112	0.0781224	0.603346	0.0240987	SLIT-ROBO Rho GTPase activating protein 1	NM_020762.2
BRPF3	PH_hs_0013085	252	291	616	634	2.91442e-05	1.45033e-05	2.57255e-06	2.44076e-06	0	0	0	0	4.40746e-25	7.35046e-34	271.201	624.975	0.0972911	0.0828307	0.60313	0.000783153	bromodomain and PHD finger containing, 3	NM_015695.2
EIF4EBP3	PH_hs_0026884	77	98	197	183	0.00179237	0.000460787	4.60441e-05	5.81977e-05	0	0	0	0	9.22851e-12	1.34779e-19	87.1934	190.028	0.14886	0.111352	0.603044	0.0343333	eukaryotic translation initiation factor 4E binding protein 3	NM_003732.2
FOXD1	PH_hs_0005225	659	1087	1738	2112	2.28106e-06	1.09415e-06	6.84736e-07	5.9209e-07	0	0	0	0	6.40274e-09	3.98697e-17	864.492	1924.34	0.175789	0.120025	0.602358	0.0457467	forkhead box D1	NM_004472.2
UBA52	PH_hs_0037046	132	180	351	361	0.000170141	6.13919e-05	8.79236e-06	8.1974e-06	0	0	0	0	6.42801e-12	1.27242e-30	155.19	355.986	0.147705	0.0873885	0.60213	0.0233584	ubiquitin A-52 residue ribosomal protein fusion product 1	NM_003333.3,NM_001033930.1
AMIGO2	PH_hs_0060654	229	247	503	599	2.93859e-05	2.31044e-05	4.60524e-06	2.70819e-06	0	0	0	0	4.72632e-27	5.51683e-17	238.142	550.831	0.0933982	0.120582	0.601521	0.00747591	adhesion molecule with Ig-like domain 2	NM_001143668.1
MPP3	PH_hs_0024565	85	93	215	170	0.16377	0.000548859	3.5079e-05	0.00010913	0	0	0	0	0.000106639	2.70161e-11	89.0214	192.585	0.27007	0.152453	0.601429	0.247139	membrane protein, palmitoylated 3 (MAGUK p55 subfamily member 3)	NM_001932.4,NR_003562.2
BTG3	PH_hs_0004454	4874	5525	9958	11241	3.96435e-07	3.81893e-07	3.3663e-07	3.30576e-07	0	0	0	0	6.34194e-38	5.47485e-24	5196.17	10597.3	0.0780036	0.0996742	0.601288	0.00146978	BTG family, member 3	NM_001130914.1,NM_006806.4
RGPD4|RGPD6|RGPD5|RGPD8|GCC2	PH_hs_0062287	295	318	670	747	1.3926e-05	0.00169543	2.21503e-06	1.84743e-06	0	0	0	0	4.27104e-20	6.07247e-23	306.687	708.368	0.109817	0.102121	0.601071	0.0120676	RANBP2-like and GRIP domain containing 4|RANBP2-like and GRIP domain containing 6|RANBP2-like and GRIP domain containing 5|RANBP2-like and GRIP domain containing 8|GRIP and coiled-coil domain containing 2	NM_182588.2|NM_001123363.3|NM_005054.2|NM_001164463.1|NM_181453.3,NR_028063.1
MTMR4	PH_hs_0008374	304	505	751	1097	1.28317e-05	3.7921e-06	1.83185e-06	1.08219e-06	0	0	0	0	2.22782e-08	1.409e-09	400.491	923.378	0.182756	0.168297	0.600547	0.0874036	myotubularin related protein 4	NM_004687.4
LRRC37B|LRRC37BP1	PH_hs_0027404	374	641	877	976	7.50098e-06	0.335355	1.44984e-06	4.82475e-06	0	0	0	0	0.112611	1.34249e-22	502.1	926.331	0.824565	0.102967	0.600533	0.00489115	leucine rich repeat containing 37B|leucine rich repeat containing 37B pseudogene 1	NM_052888.2|NR_015341.2
SLC24A2	PH_hs_0014583	201	143	408	387	4.32409e-05	0.000130303	6.0839e-06	6.89942e-06	0	0	0	0	3.94275e-07	1.21587e-25	173.874	397.544	0.202504	0.0961368	0.600087	0.109594	solute carrier family 24 (sodium/potassium/calcium exchanger), member 2	NM_001193288.2,NM_020344.3
TSG101	PH_hs_0025977	2652	2717	5510	5827	5.13974e-07	5.07439e-07	3.82212e-07	3.76374e-07	0	0	0	0	2.93328e-28	3.10307e-33	2689.54	5668	0.0912302	0.0836558	0.600078	0.00261074	tumor susceptibility gene 101	NM_006292.3
ATP6V0A2	PH_hs_0061800	152	217	435	493	0.315378	3.41123e-05	5.51735e-06	3.99057e-06	0	0	0	0	0.0279436	2.84897e-20	183.337	463.9	0.523036	0.109291	0.599943	0.209562	ATPase, H+ transporting, lysosomal V0 subunit a2	NM_012463.3
BTBD7	PH_hs_0040476	85	119	194	197	0.000738865	0.445489	4.84416e-05	6.77229e-05	0	0	0	0	0.316894	6.73655e-27	101.405	195.497	2.09906	0.0936858	0.59935	0.00714986	BTB (POZ) domain containing 7	NM_001002860.2
TMEM41B	PH_hs_0046418	148	216	456	377	0.000117095	3.46428e-05	4.72315e-06	7.3624e-06	0	0	0	0	3.04847e-10	7.79477e-15	180.756	416.65	0.161606	0.130164	0.599192	0.0591659	transmembrane protein 41B	NM_001165030.2,NR_028491.2
ING3	PH_hs_0044303	753	850	1797	1781	1.8242e-06	1.51659e-06	6.66654e-07	6.714e-07	0	0	0	0	5.78522e-35	1.14792e-38	801.07	1789.05	0.0814319	0.0772095	0.598954	0.000975484	inhibitor of growth family, member 3	NM_198267.1
CHURC1	PH_hs_0032667	229	278	478	712	2.89495e-05	1.64332e-05	4.25947e-06	2.01083e-06	0	0	0	0	5.15129e-20	6.11288e-09	252.907	594.579	0.110063	0.175545	0.598486	0.0507174	churchill domain containing 1	NM_145165.3,NM_001204064.1,NM_001204063.1
ZXDB	PH_hs_0042863	494	595	1192	1257	3.97081e-06	0.000196533	9.83085e-07	9.27865e-07	0	0	0	0	3.29278e-19	9.04878e-32	543.332	1224.4	0.112591	0.0856883	0.59825	0.00228035	zinc finger, X-linked, duplicated B	NM_007157.3
CEP170B	PH_hs_0010777	946	1139	2316	2283	1.30591e-06	1.03551e-06	5.57032e-07	5.62145e-07	0	0	0	0	1.64194e-25	6.72064e-38	1040.27	2299.59	0.0964024	0.078031	0.598055	0.000931533	centrosomal protein 170B	NM_001112726.2,NM_015005.2
OAZ1	PH_hs_0035238	11073	16721	25687	28226	3.31285e-07	3.15593e-07	3.05223e-07	3.4085e-07	0	0	0	0	1.08231e-11	2.33454e-27	13790.6	26952.2	0.149377	0.0928335	0.597577	0.0185659	ornithine decarboxylase antizyme 1	NM_004152.2
MDFIC	PH_hs_0046025	812	1024	1978	2082	3.62279e-06	1.17769e-06	6.19884e-07	5.97734e-07	0	0	0	0	4.32027e-20	4.30806e-33	914.991	2029.84	0.109832	0.0838472	0.597409	0.00140998	MyoD family inhibitor domain containing	NM_001166346.1
TRMT13	PH_hs_0049259	86	147	246	268	0.000711073	0.00013304	2.3378e-05	1.823e-05	0	0	0	0	1.06924e-06	1.70471e-21	115.268	256.963	0.210976	0.105827	0.596731	0.111694	tRNA methyltransferase 13 homolog (S. cerevisiae)	NM_019083.2
DDAH1	PH_hs_0018551	92	105	206	225	0.000572359	0.000368459	4.01592e-05	3.06252e-05	0	0	0	0	1.54369e-18	2.5823e-20	98.4203	215.468	0.114834	0.109164	0.596667	0.00638782	dimethylarginine dimethylaminohydrolase 1	NM_001134445.1,NM_012137.3
NOP2	PH_hs_0001422	262	309	687	621	1.94864e-05	1.26765e-05	2.12131e-06	2.53403e-06	0	0	0	0	2.69887e-23	4.60008e-22	285.036	654.13	0.101276	0.104324	0.596306	0.00856128	NOP2 nucleolar protein	NM_001258310.1,NM_001258309.1,NM_001258308.1,NM_001033714.2,NM_006170.3
HN1L	PH_hs_0025603	128	226	354	443	0.000188859	3.0133e-05	8.60646e-06	5.03861e-06	0	0	0	0	8.53469e-07	7.69055e-14	174.995	398.342	0.208971	0.135431	0.596221	0.112831	hematological and neurological expressed 1-like	NM_144570.2
RPL13A	PH_hs_0045982	3693	4183	7587	8672	4.3829e-07	4.1761e-07	3.53685e-07	3.4385e-06	0	0	0	0	7.4191e-38	5.33082e-21	3935.55	8127.62	0.0780778	0.10719	0.595578	0.0043246	ribosomal protein L13a	NR_073024.1,NM_001270491.1,NM_012423.3
NCL	PH_hs_0004572	6664	9359	14426	17346	3.63941e-07	4.00954e-07	9.36596e-07	3.14527e-07	0	0	0	0	1.60832e-14	5.28949e-18	7964.17	15880.9	0.131765	0.116721	0.595501	0.0146299	nucleolin	NM_005381.2
FIGNL1	PH_hs_0030773	89	141	303	296	0.418581	0.000137515	1.62075e-05	1.3818e-05	0	0	0	0	0.17988	1.35296e-27	113.988	299.517	1.09192	0.0924038	0.595081	0.00878424	fidgetin-like 1	NM_022116.3,NM_001042762.1
NKD2	PH_hs_0029474	93	86	188	201	0.000548192	0.00073094	5.37005e-05	4.35978e-05	0	0	0	0	4.48655e-11	1.37904e-21	89.8968	194.479	0.154242	0.10558	0.59486	0.0328091	naked cuticle homolog 2 (Drosophila)	NM_001271082.1,NM_033120.3
RPL21|RPL21P28	PH_hs_0035139	4862	7370	11825	12438	3.96932e-07	3.55845e-07	3.28402e-07	3.26115e-07	0	0	0	0	1.62708e-11	1.35275e-34	6068.63	12130.5	0.150725	0.0818914	0.594809	0.0167404	ribosomal protein L21|ribosomal protein L21 pseudogene 28	NM_000982.3|NR_026911.1
PAPOLA	PH_hs_0022981	1801	2927	4969	4867	6.66957e-07	4.87606e-07	3.94048e-07	3.96627e-07	0	0	0	0	1.68382e-09	2.34441e-37	2341.78	4918.25	0.169131	0.0786278	0.594648	0.0336922	poly(A) polymerase alpha	NM_032632.4
TMEM38B	PH_hs_0024885	3606	4206	7720	8199	6.71339e-07	4.16778e-07	0.00227518	3.48269e-07	0	0	0	0	1.52702e-31	5.72315e-19	3900.73	7958.73	0.086017	0.113379	0.594494	0.0239351	transmembrane protein 38B	NM_018112.2
CDC26	PH_hs_0035902	175	251	466	501	6.71891e-05	2.20425e-05	4.50063e-06	3.86168e-06	0	0	0	0	4.80856e-11	6.80043e-26	211.633	483.442	0.154491	0.0956292	0.594027	0.0259329	cell division cycle 26 homolog (S. cerevisiae)	NM_139286.3
ZFP64	PH_hs_0008731	153	194	407	386	0.000104176	4.84537e-05	6.13093e-06	6.95062e-06	0	0	0	0	2.03474e-15	1.30768e-25	172.908	396.544	0.127344	0.0962009	0.593583	0.0140679	ZFP64 zinc finger protein	NM_199426.1,NM_022088.4,NM_018197.2
KLF10	PH_hs_0004701	1275	1380	2733	3068	9.17851e-07	8.57087e-07	5.05533e-07	4.77504e-07	0	0	0	0	6.50048e-37	4.01033e-24	1328.18	2899.93	0.0791252	0.0993703	0.593026	0.00255848	Kruppel-like factor 10	NM_001032282.2,NM_005655.2
CLK1	PH_hs_0044272	2786	3632	6584	6651	5.00331e-07	4.41315e-07	3.64979e-07	3.98432e-07	0	0	0	0	6.72846e-19	6.30584e-44	3195.86	6617.47	0.113612	0.0722009	0.593007	0.00240843	CDC-like kinase 1	NM_001162407.1,NM_004071.3,NR_027856.1,NR_027855.1
DCAF12	PH_hs_0061445	655	948	1664	1865	2.30358e-06	3.1572e-06	7.09883e-07	6.47678e-07	0	0	0	0	3.36213e-12	7.02666e-24	796.181	1764.16	0.1457	0.0999198	0.59284	0.0146891	DDB1 and CUL4 associated factor 12	NM_015397.3
MGEA5	PH_hs_0000582	355	532	954	1026	8.54278e-06	3.41478e-06	1.29129e-06	1.17788e-06	0	0	0	0	8.17341e-11	3.83425e-28	440.186	989.881	0.15644	0.0914326	0.592755	0.0236602	meningioma expressed antigen 5 (hyaluronidase)	NM_001142434.1,NM_012215.3
ELMOD2	PH_hs_0061916	308	372	750	792	1.2396e-05	7.60885e-06	1.83633e-06	1.68842e-06	0	0	0	0	8.86463e-22	3.34224e-30	339.248	770.933	0.105069	0.0880353	0.59261	0.00117331	ELMO/CED-12 domain containing 2	NM_153702.3
DEF8	PH_hs_0003953	1584	2500	3774	4913	7.40717e-07	5.31719e-07	4.3464e-07	3.95439e-07	0	0	0	0	3.48366e-10	9.85746e-14	2024.22	4341.47	0.162158	0.136041	0.592568	0.0471114	differentially expressed in FDCP 8 homolog (mouse)	NM_001242821.1,NM_017702.3,NM_001242822.1
EEF1A1	PH_hs_0033695	2135	2594	4866	5099	5.87508e-07	5.20418e-07	3.96639e-07	3.90933e-07	0	0	0	0	1.64078e-25	6.14646e-35	2358.92	4982.14	0.0964018	0.0814644	0.59254	0.000449094	eukaryotic translation elongation factor 1 alpha 1	NM_001402.5
ZNF587	PH_hs_0028127	86	125	229	233	0.000711571	0.000204207	2.89733e-05	2.75066e-05	0	0	0	0	3.90958e-09	8.2463e-29	104.789	230.996	0.173241	0.0902892	0.592403	0.0558899	zinc finger protein 587	NM_001204817.1,NM_032828.3
KDM5C	PH_hs_0022253	413	530	1044	1071	6.297e-06	3.43547e-06	1.14955e-06	1.11415e-06	0	0	0	0	7.28435e-18	9.74987e-37	469.752	1057.46	0.117226	0.0793256	0.592212	0.00354181	lysine (K)-specific demethylase 5C	NM_001146702.1,NM_004187.3
TREM1	PH_hs_0014586	112	195	312	374	0.000294947	4.75479e-05	1.19618e-05	7.50847e-06	0	0	0	0	8.00916e-07	1.14962e-15	151.811	342.891	0.208416	0.126198	0.591369	0.115968	triggering receptor expressed on myeloid cells 1	NM_001242590.1,NM_018643.3
TRIM33	PH_hs_0023549	125	180	322	368	0.00160742	0.000342645	1.10089e-05	7.80725e-06	0	0	0	0	8.18596e-09	9.82098e-19	151.507	344.92	0.1771	0.114164	0.591091	0.056799	tripartite motif containing 33	NM_033020.2,NM_015906.3
QSOX1	PH_hs_0004450	98	117	222	250	0.000461824	0.000255063	3.18225e-05	2.24268e-05	0	0	0	0	2.86207e-16	2.24699e-18	107.293	235.952	0.123532	0.1154	0.590453	0.0126712	quiescin Q6 sulfhydryl oxidase 1	NM_002826.4
GNL3	PH_hs_0029728	757	920	1778	1932	1.80881e-06	1.3599e-06	6.72331e-07	6.30916e-07	0	0	0	0	5.75202e-24	8.34577e-28	836.516	1854.74	0.0997227	0.092028	0.590393	0.000890774	guanine nucleotide binding protein-like 3 (nucleolar)	NM_206826.1,NM_206825.1,NM_014366.4
RGS3	PH_hs_0004711	6114	9824	15044	16083	3.71686e-07	3.37359e-07	3.18967e-07	3.1679e-07	0	0	0	0	6.8382e-10	1.23608e-31	7896.25	15561.8	0.165037	0.0858838	0.590269	0.0290246	regulator of G-protein signaling 3	NM_144488.4,NM_144489.2,NM_021106.3,NM_130795.2,NM_134427.1
SENP5	PH_hs_0001262	188	209	420	483	0.109716	3.82856e-05	5.86814e-06	4.16826e-06	0	0	0	0	1.51439e-06	4.89565e-19	198.469	451.391	0.214185	0.113155	0.589841	0.132133	SUMO1/sentrin specific peptidase 5	NM_152699.4
TRAF6	PH_hs_0005066	89	115	211	234	0.00063537	0.000353601	3.71951e-05	2.71457e-05	0	0	0	0	3.82154e-12	2.99488e-19	101.605	222.461	0.14609	0.112458	0.589508	0.0257885	TNF receptor-associated factor 6, E3 ubiquitin protein ligase	NM_004620.3,NM_145803.2
C10orf88	PH_hs_0014575	190	285	516	554	5.34089e-05	1.53238e-05	3.62879e-06	3.14465e-06	0	0	0	0	5.38887e-10	1.79896e-26	235.72	534.938	0.164003	0.0944969	0.589293	0.0352626	chromosome 10 open reading frame 88	NM_024942.3
BUD31	PH_hs_0018480	760	1071	1783	2259	1.82945e-06	1.11396e-06	7.91893e-07	5.65966e-07	0	0	0	0	1.16636e-13	9.43773e-15	910.015	2020.15	0.136459	0.130581	0.588924	0.0236444	BUD31 homolog (S. cerevisiae)	NM_003910.3
ARVCF	PH_hs_0023814	86	107	181	216	0.000711109	0.000344284	0.254087	3.46853e-05	0	0	0	0	1.46256e-13	0.00565581	96.2157	198.439	0.137028	0.394801	0.588258	0.290059	armadillo repeat gene deleted in velocardiofacial syndrome	NM_001670.2
ZNF513	PH_hs_0020970	93	112	216	231	0.000548571	0.000296235	7.80224e-05	7.57906e-05	0	0	0	0	1.78403e-15	1.41294e-20	102.281	223.476	0.127077	0.108397	0.58783	0.0139854	zinc finger protein 513	NM_144631.5,NM_001201459.1
AHCTF1	PH_hs_0044462	333	229	630	656	1.00689e-05	2.89478e-05	2.46872e-06	2.29736e-06	0	0	0	0	4.16405e-07	7.40716e-32	284.292	642.961	0.202942	0.0855635	0.58776	0.109374	AT hook containing transcription factor 1	NM_015446.4
YY1AP1	PH_hs_0029900	1308	1681	3118	3294	8.89625e-07	7.03836e-07	4.7258e-07	4.60567e-07	0	0	0	0	1.56527e-19	5.47431e-33	1488.91	3205.72	0.111557	0.0839878	0.587652	0.00171377	YY1 associated protein 1	NM_001198906.1,NM_001198905.1,NM_001198904.1,NM_001198903.1,NM_001198902.1,NM_001198901.1,NM_001198900.1,NM_001198899.1,NM_139121.2,NM_139118.2,NM_018253.3,NM_139119.2
NPDC1	PH_hs_0005864	96	153	261	288	0.000493718	0.000120306	2.00658e-05	1.4886e-05	0	0	0	0	9.8662e-08	1.18313e-20	123.387	274.454	0.19224	0.108174	0.587223	0.0896752	neural proliferation, differentiation and control, 1	NM_015392.3
CALB2	PH_hs_0005942	183	207	420	471	0.00619504	4.45373e-05	6.06465e-06	4.40006e-06	0	0	0	0	3.51064e-16	4.62917e-21	194.885	445.413	0.123913	0.107018	0.587136	0.0231865	calbindin 2	NR_027910.2,NM_001740.4,NM_007088.3
PIAS3|LOC101060431	PH_hs_0028427	142	189	371	379	0.000133245	5.2489e-05	2.39261e-05	7.2676e-06	0	0	0	0	5.33202e-13	2.21999e-30	164.739	374.99	0.140417	0.0877596	0.586369	0.0254479	protein inhibitor of activated STAT, 3|E3 SUMO-protein ligase PIAS3-like	NM_006099.3|XM_003960159.1,XM_003960158.1,XM_003960157.1,XM_003960156.1,XM_003960155.1,XM_003960154.1,XM_003960153.1
WDR5	PH_hs_0061261	560	826	1376	1701	1.4526e-05	1.59007e-06	8.45021e-07	6.96977e-07	0	0	0	0	2.16526e-11	5.83646e-16	688.086	1537.93	0.151692	0.124877	0.585308	0.0349204	WD repeat domain 5	NM_052821.3,NM_017588.2
TMCO1	PH_hs_0005153	3532	4859	7916	9036	4.47966e-07	3.97771e-07	3.50661e-07	3.42121e-07	0	0	0	0	1.55683e-15	9.32508e-23	4172.82	8474.06	0.126803	0.102576	0.585215	0.00986237	transmembrane and coiled-coil domains 1	NM_001256165.1,NM_001256164.1,NM_019026.4,NR_045818.1
JMJD1C	PH_hs_0025863	201	252	505	522	4.32556e-05	2.18123e-05	3.79187e-06	3.54219e-06	0	0	0	0	3.57199e-17	4.82132e-32	225.79	513.476	0.119838	0.0852977	0.584542	0.0055074	jumonji domain containing 1C	NM_004241.2,NM_032776.1
STK19	PH_hs_0045246	59	101	225	183	0.00235916	0.275476	3.05929e-05	5.83409e-05	-50	0	0	0	0.0539699	1.55509e-12	79.151	204.08	0.622075	0.143417	0.584528	0.513203	serine/threonine kinase 19	NM_032454.1,NM_004197.1,NR_026717.1
CNOT2	PH_hs_0047530	283	393	733	786	1.56291e-05	6.65446e-06	1.9053e-06	0.000103842	0	0	0	0	4.7814e-13	1.0075e-22	336.095	759.413	0.140122	0.102659	0.584351	0.0346244	CCR4-NOT transcription complex, subunit 2	NM_001199303.1,NM_001199302.1,NM_014515.5,NR_037615.1
AKAP2|PALM2-AKAP2	PH_hs_0049493	380	354	694	1003	7.21433e-06	8.6133e-06	2.08592e-06	1.22751e-06	0	0	0	0	5.1479e-16	8.67146e-10	368.56	847.945	0.124637	0.166088	0.584179	0.0605013	A kinase (PRKA) anchor protein 2|PALM2-AKAP2 readthrough	NM_001198656.1,NM_001004065.4,NM_001136562.2|NM_147150.2,NM_007203.4
LIMS1	PH_hs_0045769	3713	4329	8122	8215	4.37316e-07	4.12486e-07	3.48897e-07	3.48133e-07	0	0	0	0	4.82754e-32	7.56701e-44	4015.62	8168.44	0.0852985	0.0722631	0.584162	0.000236033	LIM and senescent cell antigen-like domains 1	NM_001193488.1,NM_001193484.1,NM_001193482.1,NM_001193485.2,NM_004987.5,NM_001193483.2
FZD5	PH_hs_0009160	332	399	802	842	1.0148e-05	1.23755e-05	1.65365e-06	1.53802e-06	0	0	0	0	5.64761e-22	2.18395e-31	364.736	821.938	0.104555	0.086244	0.584031	0.00104081	frizzled family receptor 5	NM_003468.3
KBTBD2	PH_hs_0001760	1254	1567	2975	3085	9.30016e-07	7.47806e-07	4.83614e-07	4.75015e-07	0	0	0	0	6.29351e-22	1.14365e-36	1406.19	3029.84	0.104678	0.0794048	0.583593	0.000963398	kelch repeat and BTB (POZ) domain containing 2	NM_015483.2
GPT2	PH_hs_0017245	274	355	676	742	1.80827e-05	8.74741e-06	2.18128e-06	1.8681e-06	0	0	0	0	3.20187e-16	1.16994e-24	313.26	708.889	0.123741	0.0981942	0.583385	0.00639581	glutamic pyruvate transaminase (alanine aminotransferase) 2	NM_001142466.1,NM_133443.2
TAP1	PH_hs_0032801	1644	1902	3757	3796	7.17259e-07	7.19341e-06	4.35231e-07	3.89188e-06	0	0	0	0	2.02849e-29	1.59619e-39	1770.97	3776.48	0.0892822	0.0763222	0.583207	0.00194286	transporter 1, ATP-binding cassette, sub-family B (MDR/TAP)	NM_000593.5
PEAK1	PH_hs_0000987	69	88	164	170	0.0123587	0.000659534	8.29425e-05	7.39917e-05	0	0	0	0	1.52022e-09	1.50156e-23	78.2209	166.991	0.168651	0.100679	0.583168	0.0601108	NKF3 kinase family member	NM_024776.3
RSRC2	PH_hs_0033316	2379	2918	5374	5630	5.47793e-07	4.8838e-07	3.84915e-07	3.79898e-07	0	0	0	0	1.77467e-24	4.71833e-35	2641.63	5501.61	0.0985873	0.0813227	0.582828	0.000729414	arginine/serine-rich coiled-coil 2	NM_023012.5,NR_036435.1,NR_036436.1,NR_036434.1
PAM	PH_hs_0023953	7950	9874	17558	17433	3.50361e-07	3.37084e-07	3.14159e-07	3.14365e-07	0	0	0	0	1.3544e-23	2.72188e-41	8886.13	17496	0.100574	0.0745835	0.582801	0.000905766	peptidylglycine alpha-amidating monooxygenase	NR_033440.1,NM_001177306.1,NM_138821.2,NM_138822.2,NM_138766.2,NM_000919.3
MLLT6	PH_hs_0049170	120	215	357	389	0.000403881	3.5082e-05	8.42426e-06	2.31591e-05	0	0	0	0	1.64721e-06	4.81355e-22	165.546	372.946	0.214982	0.104375	0.582797	0.132125	myeloid/lymphoid or mixed-lineage leukemia (trithorax homolog, Drosophila); translocated to, 6	NM_005937.3
SLC7A6OS	PH_hs_0016485	98	125	231	257	0.000461493	0.00020517	2.81934e-05	2.05806e-05	0	0	0	0	3.26817e-13	1.9283e-19	111.103	243.956	0.139105	0.111844	0.582601	0.0239961	solute carrier family 7, member 6 opposite strand	NM_032178.2
AP5Z1	PH_hs_0043465	230	246	516	569	2.86133e-05	2.35259e-05	3.62681e-06	2.98673e-06	0	0	0	0	5.74583e-26	2.2632e-23	238.192	542.41	0.0954834	0.101096	0.582444	0.00431349	adaptor-related protein complex 5, zeta 1 subunit	NM_014855.2
MROH8	PH_hs_0016849	288	379	657	856	1.48982e-05	7.26047e-06	2.29543e-06	1.5329e-06	0	0	0	0	1.55575e-15	6.2951e-13	332.058	756.146	0.126801	0.14087	0.581962	0.0267591	maestro heat-like repeat family member 8	NM_213632.1,NM_213631.1
PMPCB	PH_hs_0010853	195	285	523	554	4.76497e-05	1.53457e-05	3.5303e-06	3.1462e-06	0	0	0	0	1.03261e-10	2.37425e-28	238.351	538.45	0.157321	0.0910714	0.581934	0.0303084	peptidase (mitochondrial processing) beta	NM_004279.2
IDH3G	PH_hs_0044226	928	1463	2457	2646	1.34006e-06	8.02608e-07	5.37188e-07	5.14629e-07	0	0	0	0	4.62569e-10	1.67665e-29	1185.12	2551.19	0.16335	0.089148	0.581904	0.0287542	isocitrate dehydrogenase 3 (NAD+) gamma	NM_174869.2,NM_004135.3
RC3H1	PH_hs_0002599	468	573	1163	1145	4.4614e-06	0.00121446	1.01505e-06	1.02923e-06	0	0	0	0	2.18799e-15	5.3569e-36	519.173	1154.05	0.127491	0.0801845	0.581541	0.012319	ring finger and CCCH-type domains 1	NM_172071.2
EFNB2	PH_hs_0002640	1234	1601	2984	3083	9.46594e-07	7.33794e-07	4.82881e-07	4.75177e-07	0	0	0	0	9.34726e-19	1.74083e-37	1411.86	3033.36	0.114091	0.0784844	0.581212	0.0023365	ephrin-B2	NM_004093.3
MRPS18C	PH_hs_0062451	353	369	790	828	0.000713283	7.7681e-06	1.69307e-06	1.57676e-06	0	0	0	0	2.27144e-19	1.27184e-31	361.497	808.941	0.112071	0.0859017	0.581117	0.0123101	mitochondrial ribosomal protein S18C	NM_016067.2
CYB561	PH_hs_0017204	579	759	1383	1577	2.9014e-06	1.80224e-06	8.42493e-07	7.43678e-07	0	0	0	0	3.84317e-17	6.49129e-22	666.171	1479.66	0.119962	0.104713	0.580627	0.00732571	cytochrome b-561	NM_001915.3,NM_001017917.1,NM_001017916.1
IL5RA	PH_hs_0004089	43	68	128	138	0.00672577	0.00163891	0.000188867	0.000147223	-50	0	0	0	2.45765e-06	2.43546e-18	55.0142	132.983	0.218896	0.115522	0.580618	0.0106267	interleukin 5 receptor, alpha	NM_001243099.1,NM_175726.3,NM_000564.4
ATP6V0A2	PH_hs_0022997	399	539	1050	1032	6.41324e-06	3.32205e-06	1.14139e-06	1.16627e-06	0	0	0	0	7.3346e-15	2.54691e-35	466.672	1041.05	0.130032	0.0809952	0.579558	0.0106222	ATPase, H+ transporting, lysosomal V0 subunit a2	NM_012463.3
N4BP2L2	PH_hs_0044758	107	128	245	252	0.000344161	0.332606	2.36752e-05	2.1887e-05	0	0	0	0	0.0547271	7.2561e-28	117.268	248.491	0.624746	0.0919201	0.579357	0.272706	NEDD4 binding protein 2-like 2	NM_033111.3
FAM135A	PH_hs_0044270	81	87	178	179	0.00165434	0.000684117	6.37819e-05	6.26698e-05	0	0	0	0	1.81362e-16	1.88679e-27	84.0589	178.501	0.122693	0.0926651	0.578965	0.0164593	family with sequence similarity 135, member A	NM_001162529.1,NM_020819.4,NM_001105531.2
SUPT6H	PH_hs_0032323	1329	1568	2862	3371	8.75149e-07	7.48138e-07	4.93388e-07	4.56152e-07	0	0	0	0	7.09454e-29	1.33219e-19	1446.13	3115.61	0.0901796	0.111337	0.578852	0.00406001	suppressor of Ty 6 homolog (S. cerevisiae)	NM_003170.3
STK3	PH_hs_0010029	161	199	384	428	8.83317e-05	0.00115932	7.03823e-06	5.44362e-06	0	0	0	0	6.85885e-14	2.3647e-21	179.499	405.925	0.135153	0.106213	0.57761	0.0171475	serine/threonine kinase 3	NM_001256313.1,NM_001256312.1,NM_006281.3
RTN3	PH_hs_0033130	886	1106	1965	2394	1.43519e-06	1.07167e-06	6.22899e-07	5.4579e-07	0	0	0	0	1.48266e-21	4.99565e-17	992.985	2178.74	0.105664	0.120411	0.577405	0.00866055	reticulon 3	NM_001265590.1,NM_001265591.1,NM_001265589.1,NM_201430.2,NM_201429.2,NM_201428.2,NM_006054.3,NR_049751.1,NR_049750.1
TBX20	PH_hs_0046116	119	106	239	254	0.00024078	0.000355326	2.7351e-05	2.1289e-05	0	0	0	0	8.85024e-11	1.1236e-23	113.104	246.476	0.156738	0.100387	0.577353	0.0479581	T-box 20	NM_001166220.1
ARHGEF18	PH_hs_0000626	1220	1448	2832	2904	9.58173e-07	8.04237e-07	4.98438e-07	4.89596e-07	0	0	0	0	7.29404e-28	3.62951e-39	1331.62	2867.91	0.0919241	0.0766879	0.577179	0.00034716	Rho/Rac guanine nucleotide exchange factor (GEF) 18	NM_001130955.1,NM_015318.3
ITGB1	PH_hs_0044701	8009	11236	17785	19596	3.49979e-07	3.30898e-07	3.13794e-07	3.11198e-07	0	0	0	0	1.20604e-14	4.80789e-27	9565.9	18687.4	0.131122	0.093412	0.577027	0.00991374	integrin, beta 1 (fibronectin receptor, beta polypeptide, antigen CD29 includes MDF2, MSK12)	NM_002211.3,NM_133376.2,NM_033668.2
MRPL55	PH_hs_0003971	606	1014	1490	1665	2.65039e-06	0.0373174	3.82362e-06	7.09527e-07	0	0	0	0	0.000151647	5.06291e-23	801.834	1577.2	0.276819	0.101929	0.576773	0.161934	mitochondrial ribosomal protein L55	NM_181441.2,NM_181465.2,NM_181464.2,NM_181462.2,NM_181456.2,NM_181455.2,NM_181454.2,NM_181463.2
CCNDBP1	PH_hs_0002911	850	1161	2188	2161	1.51655e-06	1.01281e-06	5.77942e-07	5.82788e-07	0	0	0	0	3.10061e-15	3.01029e-38	1000.24	2174.58	0.128209	0.0776544	0.576759	0.00819983	cyclin D-type binding-protein 1	NM_012142.4,NR_045999.1,NR_045998.1,NR_027513.2,NR_027514.2
NAA16	PH_hs_0044472	61	85	169	171	0.477703	0.0193694	7.51926e-05	7.26913e-05	-50	0	0	0	0.401634	1.38745e-26	72.5826	169.999	4.01412	0.0942804	0.576577	0.0395212	N(alpha)-acetyltransferase 16, NatA auxiliary subunit	NM_018527.3,NM_001110798.1
TROVE2	PH_hs_0023502	62	85	168	172	0.00201303	0.000738904	7.6849e-05	7.11064e-05	-50	0	0	0	2.2006e-09	4.08259e-25	73.1088	169.995	0.170405	0.0972213	0.576197	0.0108391	TROVE domain family, member 2	NM_001173524.1,NM_004600.5,NR_033393.1
FBRS	PH_hs_0023214	263	305	607	677	1.92499e-05	1.27199e-05	2.65327e-06	2.17527e-06	0	0	0	0	3.36606e-25	1.15926e-22	283.657	641.88	0.0970461	0.102809	0.575946	0.00268435	fibrosin	NM_001105079.1
MRPS24|URGCP-MRPS24	PH_hs_0014733	24286	28790	47636	50408	3.06345e-07	3.03174e-07	2.96553e-07	2.95997e-07	0	0	0	0	7.04625e-30	1.23938e-33	26491.5	49017.6	0.0885447	0.0831272	0.57593	0.000356487	mitochondrial ribosomal protein S24|URGCP-MRPS24 readthrough	NM_032014.2|NM_001204871.1
C12orf44	PH_hs_0001025	2887	3191	6181	6333	4.91202e-07	9.7958e-06	3.70661e-07	3.68423e-07	0	0	0	0	4.36816e-38	3.46956e-40	3038.96	6256.81	0.0778283	0.0756564	0.575691	0.00139309	chromosome 12 open reading frame 44	NM_001098673.1,NM_021934.4
TOB1	PH_hs_0010585	337	395	711	948	9.77233e-06	6.5686e-06	2.00287e-06	1.33734e-06	0	0	0	0	2.42601e-25	3.9298e-12	365.462	829.077	0.0967508	0.146176	0.575566	0.0245324	transducer of ERBB2, 1	NM_001243885.1,NM_001243877.1,NM_005749.3
DNAL1	PH_hs_0061224	146	316	478	525	0.000121728	1.16652e-05	4.26173e-06	3.51499e-06	0	0	0	0	3.83227e-05	1.53605e-23	227.333	501.421	0.252867	0.100701	0.57552	0.179201	dynein, axonemal, light chain 1	NM_031427.3,NM_001201366.1
TTC4|HEATR8-TTC4	PH_hs_0044805	1731	2411	4320	4325	6.8699e-07	5.43533e-07	4.12879e-07	4.12628e-07	0	0	0	0	1.11617e-14	1.03416e-42	2059.18	4322.55	0.13095	0.0732697	0.575424	0.00892632	tetratricopeptide repeat domain 4|HEATR8-TTC4 readthrough	NM_004623.4|NR_037639.1,NR_037641.1,NR_037640.1
UBTD2	PH_hs_0010648	1510	1633	3362	3358	7.73267e-07	7.2132e-07	4.56322e-07	4.57856e-07	0	0	0	0	3.36169e-37	9.39991e-42	1572.33	3360.05	0.0788026	0.0741486	0.575223	0.00231678	ubiquitin domain containing 2	NM_152277.2
UBE2G1	PH_hs_0049064	188	299	508	575	5.34016e-05	1.34246e-05	3.74767e-06	2.92586e-06	0	0	0	0	9.76649e-09	7.8451e-21	241.336	541.385	0.17806	0.107663	0.574856	0.0590587	ubiquitin-conjugating enzyme E2G 1	NM_003342.4
C19orf12	PH_hs_0049396	103	87	198	211	0.000393155	0.000688843	0.124221	4.2053e-05	0	0	0	0	5.41233e-09	1.00178e-05	95.6349	204.479	0.174909	0.234494	0.574691	0.292504	chromosome 19 open reading frame 12	NR_045692.1,NR_045691.1,NR_045690.1,NM_001256047.1,NM_001256046.1,NM_031448.4,NM_001031726.3
CDC23	PH_hs_0009232	59	120	183	329	0.00233057	0.00023406	5.83307e-05	1.04017e-05	-50	0	0	0	5.85032e-05	6.54888e-06	88.2007	255.736	0.259584	0.229439	0.57382	0.134054	cell division cycle 23 homolog (S. cerevisiae)	NM_004661.3
AKIRIN2	PH_hs_0032149	717	943	1620	2029	1.99445e-06	1.31601e-06	7.26366e-07	6.10181e-07	0	0	0	0	3.13376e-17	2.45882e-15	826.423	1823.77	0.119616	0.12773	0.573506	0.0174235	akirin 2	NM_018064.3
ZNF7	PH_hs_0040102	326	462	901	844	1.06457e-05	4.63883e-06	1.3958e-06	1.91526e-06	0	0	0	0	1.67036e-12	1.20629e-26	391.586	872.616	0.143625	0.0941644	0.573099	0.0235372	zinc finger protein 7	NM_003416.2
ITGB1	PH_hs_0027353	12545	16889	25175	31571	3.25762e-07	3.15297e-07	3.0561e-07	3.01692e-07	0	0	0	0	5.65646e-17	9.54108e-16	14645.2	28361.7	0.120625	0.125831	0.57302	0.0201784	integrin, beta 1 (fibronectin receptor, beta polypeptide, antigen CD29 includes MDF2, MSK12)	NM_002211.3,NM_133376.2,NM_033668.2
FXR2	PH_hs_0003536	227	228	474	561	2.97868e-05	2.93296e-05	4.33975e-06	3.07367e-06	0	0	0	0	2.03237e-19	2.45581e-17	228.04	517.348	0.111917	0.119207	0.572763	0.0173607	fragile X mental retardation, autosomal homolog 2	NM_004860.3
ZNF189	PH_hs_0028898	77	110	190	207	0.00127087	0.000631977	5.16319e-05	5.26516e-05	0	0	0	0	8.57054e-09	8.74766e-20	92.909	198.472	0.177348	0.110767	0.572746	0.0627431	zinc finger protein 189	NM_197977.1,NM_003452.2
ZNF121	PH_hs_0060053	5	87	171	177	0.447605	0.000690191	7.27265e-05	6.48545e-05	-50	0	0	0	0.0796206	4.65751e-24	44.0689	173.991	0.710415	0.099516	0.572705	0.00965119	zinc finger protein 121	NM_001008727.2
ZFAND5	PH_hs_0048703	85	101	207	182	0.000750214	0.111277	3.9446e-05	5.9211e-05	0	0	0	0	2.04687e-05	5.38194e-16	92.8318	194.548	0.243776	0.124722	0.572629	0.203735	zinc finger, AN1-type domain 5	NM_001102421.1,NM_001102420.1,NM_006007.2
ZFC3H1	PH_hs_0025377	103	116	233	242	0.000390542	0.000262043	2.75132e-05	2.45368e-05	0	0	0	0	1.40883e-20	3.32495e-26	109.448	237.487	0.108393	0.0950149	0.572596	0.00544641	zinc finger, C3H1-type containing	NM_144982.4
PPP3CB	PH_hs_0022890	406	579	1016	1155	6.15921e-06	2.88721e-06	1.1906e-06	1.04414e-06	0	0	0	0	1.44045e-12	8.5253e-22	489.407	1085.26	0.143196	0.105024	0.572541	0.0210989	protein phosphatase 3, catalytic subunit, beta isozyme	NM_001142354.1,NM_001142353.1,NM_021132.2
GTPBP2	PH_hs_0001250	3804	3342	6907	7700	4.33059e-07	4.57555e-07	3.60975e-07	3.52615e-07	0	0	0	0	5.49725e-15	2.34313e-25	3593.39	7302.15	0.129413	0.0967197	0.572515	0.0271673	GTP binding protein 2	NM_019096.3
ZKSCAN5	PH_hs_0006100	51	73	144	142	0.0112535	0.00124795	0.000127418	0.000133362	-50	0	0	0	2.17218e-07	6.27949e-23	61.6052	143.006	0.197894	0.102156	0.572301	0.0216096	zinc finger with KRAB and SCAN domains 5	NM_145102.2,NM_014569.3
NRP2	PH_hs_0044623	121	137	280	290	0.000228122	0.000153261	1.61441e-05	1.51096e-05	0	0	0	0	1.32505e-21	6.58926e-28	128.921	284.986	0.105533	0.0918459	0.572207	0.00415716	neuropilin 2	NM_201264.1
ARL4D	PH_hs_0010807	330	347	761	759	1.03219e-05	9.05249e-06	1.79367e-06	1.80125e-06	0	0	0	0	3.82153e-26	3.30914e-37	338.916	760.014	0.0951335	0.0787949	0.572119	0.0055214	ADP-ribosylation factor-like 4D	NM_001661.3
CASP8	PH_hs_0062019	137	261	339	447	0.000150246	1.9671e-05	0.421748	4.94204e-06	0	0	0	0	4.47572e-06	0.195476	196.401	392.807	0.225171	1.16565	0.571568	0.13824	caspase 8, apoptosis-related cysteine peptidase	NM_033358.3
PRR25	PH_hs_0034631	106	132	266	254	0.000946076	0.000170102	1.86263e-05	2.52125e-05	0	0	0	0	8.59784e-14	6.48241e-24	118.647	260.026	0.135704	0.0998403	0.570453	0.0307359	proline rich 25	NM_001013638.1
TRMT61A	PH_hs_0048230	119	150	281	319	0.000242853	0.000111196	1.61226e-05	0.000553731	0	0	0	0	1.3471e-14	4.13477e-15	134.061	299.934	0.131368	0.12881	0.570429	0.0566218	tRNA methyltransferase 61 homolog A (S. cerevisiae)	NM_152307.2
VWA9	PH_hs_0000674	627	1429	2114	2142	2.49005e-06	8.17588e-07	5.91507e-07	5.86208e-07	0	0	0	0	3.70434e-05	1.10478e-41	1010.55	2127.98	0.252349	0.0742142	0.570306	0.160872	von Willebrand factor A domain containing 9	NM_001207059.1,NM_001207058.1,NR_045901.1,NR_045106.2,NR_045105.2,NR_045104.1,NR_045107.1
TAP2	PH_hs_0045366	129	183	310	388	0.000190343	5.9631e-05	1.24098e-05	6.85905e-06	0	0	0	0	1.1582e-10	1.36867e-13	155.04	348.862	0.15776	0.13686	0.570293	0.0601131	transporter 2, ATP-binding cassette, sub-family B (MDR/TAP)	NM_000544.3
NUPL1	PH_hs_0043778	552	666	1334	1352	3.16733e-06	2.23745e-06	8.72159e-07	8.60048e-07	0	0	0	0	5.77737e-24	2.12542e-40	607.668	1342.99	0.099727	0.0754462	0.570191	0.00148323	nucleoporin like 1	NM_014089.3,NM_001008564.1
CCDC142	PH_hs_0048681	67	82	161	164	0.0614066	0.000834665	8.8359e-05	8.29438e-05	-50	0	0	0	3.08487e-07	2.74157e-25	74.3108	162.497	0.200569	0.0968608	0.569805	0.0134054	coiled-coil domain containing 142	NM_032779.3
GMFB	PH_hs_0009126	228	256	519	567	0.0392885	2.08351e-05	3.74881e-06	3.00684e-06	0	0	0	0	1.18894e-10	2.28637e-24	241.902	542.919	0.15786	0.0988287	0.569414	0.0673275	glia maturation factor, beta	NM_004124.2
HPCAL1	PH_hs_0030900	976	2024	2907	3268	1.25316e-06	6.09753e-07	1.72904e-06	4.62539e-07	0	0	0	0	6.3765e-06	3.13173e-23	1477.58	3086.88	0.229132	0.10143	0.569333	0.133106	hippocalcin-like 1	NM_001258359.1,NM_001258358.1,NM_001258357.1,NM_134421.2,NM_002149.3
TMEM200A	PH_hs_0047747	102	170	281	315	0.0004311	7.41822e-05	1.5956e-05	1.17151e-05	0	0	0	0	3.12845e-07	1.07242e-19	134.642	297.942	0.200678	0.111042	0.569276	0.117982	transmembrane protein 200A	NM_001258277.1,NM_001258276.1,NM_001258278.1,NM_052913.2
PPP2R2A	PH_hs_0028631	266	492	714	956	1.86294e-05	4.00517e-06	2.05366e-06	1.29269e-06	0	0	0	0	9.12266e-07	5.44354e-12	374.304	834.568	0.209558	0.147183	0.568797	0.118863	protein phosphatase 2, regulatory subunit B, alpha	NM_001177591.1,NM_002717.3
STAG2	PH_hs_0000880	63	92	193	177	0.00781417	0.000572549	4.95928e-05	6.47821e-05	-50	0	0	0	1.30638e-07	1.82381e-18	76.969	185.032	0.194196	0.115084	0.568701	0.0259372	stromal antigen 2	NM_006603.4,NM_001042751.1,NM_001042750.1,NM_001042749.1
ELOVL4	PH_hs_0005663	564	707	1374	1418	3.03752e-06	2.0253e-06	8.46274e-07	8.2082e-07	0	0	0	0	2.36529e-20	2.83571e-36	633.511	1395.94	0.109051	0.0798606	0.568699	0.00265511	ELOVL fatty acid elongase 4	NM_022726.3
DYRK3	PH_hs_0044235	3693	4343	7862	8287	7.40547e-07	5.30296e-07	5.26578e-07	3.47555e-07	0	0	0	0	7.4041e-30	1.30354e-33	4011.76	8073.83	0.0885788	0.083156	0.568459	0.000483732	dual-specificity tyrosine-(Y)-phosphorylation regulated kinase 3	NM_001004023.1,NM_003582.2
CPEB2	PH_hs_0003250	145	189	363	385	0.000124376	5.2489e-05	0.000228455	7.06231e-06	0	0	0	0	6.4454e-14	3.6824e-22	166.317	373.965	0.135002	0.104075	0.568422	0.0425328	cytoplasmic polyadenylation element binding protein 2	NM_001177382.1,NM_001177381.1,NM_182646.2,NM_182485.2,NM_001177384.1,NM_001177383.1
RAPGEF2	PH_hs_0018074	491	356	918	959	3.07867e-05	9.54296e-06	5.9143e-06	1.28258e-06	0	0	0	0	9.81584e-08	6.97842e-31	427.918	938.438	0.192205	0.0869934	0.567934	0.103882	Rap guanine nucleotide exchange factor (GEF) 2	NM_014247.2
NFE2L2	PH_hs_0009358	3159	3652	6509	7337	4.69668e-07	4.40307e-07	3.65999e-07	3.56185e-07	0	0	0	0	1.89029e-33	4.72514e-24	3401.66	6921.58	0.083369	0.0995301	0.567711	0.00212242	nuclear factor (erythroid-derived 2)-like 2	NM_001145413.2,NM_001145412.2,NM_006164.4
ASPHD2	PH_hs_0047283	147	191	373	384	0.000118881	5.07709e-05	7.57156e-06	7.03884e-06	0	0	0	0	4.18723e-14	7.0494e-31	168.322	378.485	0.133971	0.087	0.567551	0.0177464	aspartate beta-hydroxylase domain containing 2	NM_020437.4
PFDN4	PH_hs_0005073	233	281	528	636	0.0110762	1.65242e-05	3.46348e-06	2.42827e-06	0	0	0	0	1.80687e-12	1.88666e-16	256.441	581.81	0.143853	0.122765	0.566569	0.0570109	prefoldin subunit 4	NM_002623.3
MCMBP	PH_hs_0061810	883	1345	2309	2422	1.43589e-06	8.76994e-07	5.58125e-07	5.41847e-07	0	0	0	0	5.65046e-11	5.61531e-34	1105.24	2365.32	0.155076	0.0826791	0.566525	0.0248225	minichromosome maintenance complex binding protein	NM_001256379.1,NM_001256378.1,NM_024834.3
MRAS	PH_hs_0016853	208	258	501	545	3.88717e-05	6.26619e-05	3.85571e-06	8.60922e-05	0	0	0	0	4.09182e-17	3.69358e-21	232.331	522.926	0.120069	0.106746	0.566412	0.0178101	muscle RAS oncogene homolog	NM_012219.4,NM_001252093.1,NM_001252092.1,NM_001252091.1,NM_001252090.1,NM_001085049.2
UBL3	PH_hs_0022600	62	79	146	165	0.00201665	0.00093781	0.000123557	8.29586e-05	-50	0	0	0	3.83255e-11	3.50297e-16	70.251	155.467	0.15368	0.123909	0.566392	0.014178	ubiquitin-like 3	NM_007106.3
MRPS24|URGCP-MRPS24	PH_hs_0062178	22658	25293	45374	43614	3.0778e-07	3.05518e-07	2.97044e-07	2.97469e-07	0	0	0	0	1.85112e-42	4.46099e-34	23969.3	44497.8	0.0734985	0.0825502	0.566355	0.00185662	mitochondrial ribosomal protein S24|URGCP-MRPS24 readthrough	NM_032014.2|NM_001204871.1
ALCAM	PH_hs_0001048	45	75	149	145	0.0196454	0.00178054	0.000260663	0.000124366	-50	0	0	0	1.90303e-05	1.01548e-20	59.4007	147.009	0.24278	0.107983	0.566248	0.0341144	activated leukocyte cell adhesion molecule	NM_001243280.1,NM_001627.3
ATXN1	PH_hs_0043740	78	87	159	188	0.000975219	0.000684655	9.76119e-05	5.33974e-05	0	0	0	0	1.40094e-18	2.84732e-14	82.4803	173.449	0.114689	0.133069	0.565995	0.0243382	ataxin 1	NM_001128164.1,NM_000332.3
SMEK1	PH_hs_0016459	165	163	318	430	8.15273e-05	8.48329e-05	1.13983e-05	5.38598e-06	0	0	0	0	1.20164e-16	6.18473e-11	164.457	373.8	0.121951	0.155407	0.565665	0.0510737	SMEK homolog 1, suppressor of mek1 (Dictyostelium)	NM_032560.4
GIGYF2	PH_hs_0045405	84	84	173	181	0.000767964	0.000767926	7.03593e-05	6.13422e-05	0	0	0	0	1.24718e-13	5.07752e-23	84.2085	176.988	0.136627	0.101932	0.565518	0.0242171	GRB10 interacting GYF protein 2	NM_001103148.1,NM_001103147.1,NM_001103146.1,NM_015575.3
TMEM147	PH_hs_0061998	738	1117	1910	2064	1.88622e-06	1.05938e-06	6.36133e-07	7.49558e-07	0	0	0	0	4.44734e-11	1.7501e-28	920.349	1986.74	0.154211	0.0908437	0.565043	0.027159	transmembrane protein 147	NM_032635.3,NM_001242598.1,NM_001242597.1
SUPT3H	PH_hs_0047409	42	75	139	154	0.00616599	0.00110967	0.00014322	0.000110125	-50	0	0	0	2.14107e-05	4.90876e-17	57.8221	146.474	0.244397	0.120381	0.564693	0.0125736	suppressor of Ty 3 homolog (S. cerevisiae)	NM_001261823.1,NM_181356.2,NM_003599.3
BRWD3	PH_hs_0048909	72	78	138	171	0.129996	0.000977511	0.000146681	7.24046e-05	0	0	0	0	1.91055e-05	5.11363e-12	75.0365	154.442	0.242834	0.146988	0.564333	0.228181	bromodomain and WD repeat domain containing 3	NM_153252.4
NME1	PH_hs_0045569	77	84	132	210	0.00235379	0.000766603	0.000216855	3.78015e-05	0	0	0	0	1.0846e-16	7.00582e-07	80.5252	170.859	0.121768	0.207261	0.564125	0.126215	NME/NM23 nucleoside diphosphate kinase 1	NM_198175.1,NM_000269.2
MSANTD3	PH_hs_0031937	588	699	1344	1482	3.02897e-06	2.07379e-06	8.98632e-07	7.93603e-07	0	0	0	0	8.24749e-26	1.82433e-25	642.329	1412.77	0.0957968	0.096496	0.56398	0.00186858	Myb/SANT-like DNA-binding domain containing 3	NM_080655.2,NM_001198806.1,NM_001198805.1,NM_001198807.1
MOB1A	PH_hs_0043083	548	1001	1538	1771	9.20672e-06	2.50362e-06	7.60778e-07	9.55023e-07	0	0	0	0	4.94639e-07	6.73817e-21	765.124	1654.1	0.204342	0.107476	0.563245	0.096177	MOB kinase activator 1A	NM_018221.3
CRYBB3	PH_hs_0042324	788	1182	1780	1937	1.70053e-06	0.437497	6.71779e-07	6.29476e-07	0	0	0	0	0.299979	1.32883e-27	977.618	1858.24	1.90672	0.0923897	0.56321	0.00111653	crystallin, beta B3	NM_004076.3
EXOC3	PH_hs_0036049	518	783	1391	1428	3.59813e-06	1.72073e-06	8.53244e-07	8.15114e-07	0	0	0	0	6.80406e-11	1.96657e-37	645.505	1409.45	0.155758	0.0785431	0.563144	0.0309165	exocyst complex component 3	NM_007277.4
BTN3A2	PH_hs_0029937	75	129	211	252	0.00137705	0.000183729	3.71743e-05	0.236063	0	0	0	0	1.9226e-06	0.00918423	100.906	231.428	0.21647	0.424069	0.563043	0.125588	butyrophilin, subfamily 3, member A2	NM_001197247.1,NM_001197249.1,NM_001197248.1,NM_001197246.1,NM_007047.3
SLC30A7	PH_hs_0047547	39	81	148	171	0.00753683	0.00143067	0.000116394	7.26147e-05	-50	0	0	0	0.000209583	4.14832e-15	59.1014	159.46	0.28347	0.128817	0.562694	0.0198671	solute carrier family 30 (zinc transporter), member 7	NM_001144884.1,NM_133496.4
SHQ1	PH_hs_0043342	465	661	1129	1335	4.52172e-06	2.26708e-06	1.04606e-06	8.71672e-07	0	0	0	0	7.57704e-13	1.15883e-18	559.509	1231.64	0.141381	0.114408	0.56251	0.0258654	SHQ1, H/ACA ribonucleoprotein assembly factor	NM_018130.2
KIF25-AS1	PH_hs_0012616	98	83	152	174	0.38056	0.000814612	0.02489	6.84432e-05	0	0	0	0	0.158547	2.06577e-09	91.0988	162.962	0.999554	0.170102	0.562473	0.142396	KIF25 antisense RNA 1	XR_132743.1,XR_133441.1
MNAT1	PH_hs_0060547	1120	2146	3590	3761	0.045369	5.85468e-07	4.43602e-07	4.35039e-07	0	0	0	0	6.2042e-05	9.78792e-35	1611.46	3675.24	0.260558	0.0817154	0.562446	0.162455	menage a trois homolog 1, cyclin H assembly factor (Xenopus laevis)	NM_001177963.1,NM_002431.3
BCAR3	PH_hs_0022999	112	166	297	313	0.000295558	8.05264e-05	1.36823e-05	1.1863e-05	0	0	0	0	2.51971e-09	4.43985e-26	137.998	304.975	0.171061	0.0952617	0.56237	0.0695072	breast cancer anti-estrogen resistance 3	NM_001261408.1,NM_001261410.1,NM_001261409.1,NM_003567.3
FXYD2|FXYD6-FXYD2	PH_hs_0062202	750	548	1420	1442	1.83574e-06	3.21257e-06	8.19364e-07	8.07495e-07	0	0	0	0	1.50323e-08	4.26146e-40	655.649	1430.98	0.180471	0.0757451	0.561767	0.0941429	FXYD domain containing ion transport regulator 2|FXYD6-FXYD2 readthrough	NM_001680.4,NM_021603.3|NM_001243598.2,NM_001204268.1
HEXB	PH_hs_0022175	955	1019	2018	2253	1.28931e-06	1.18525e-06	5.96816e-06	6.07896e-07	0	0	0	0	3.70248e-33	7.04964e-23	987.854	2135.1	0.0837586	0.102278	0.561567	0.00841555	hexosaminidase B (beta polypeptide)	NM_000521.3
LINC00494	PH_hs_0023591	112	118	233	265	0.00183516	0.000247718	2.74852e-05	1.88328e-05	0	0	0	0	4.5808e-16	6.62125e-18	115.136	248.945	0.124415	0.117075	0.561535	0.0259579	long intergenic non-protein coding RNA 494	NR_026958.1
MIER1	PH_hs_0012491	111	140	252	300	0.000304487	0.000139799	2.17942e-05	0.000117048	0	0	0	0	2.98769e-14	4.59505e-14	125.088	275.916	0.13318	0.134191	0.561451	0.0492048	mesoderm induction early response 1 homolog (Xenopus laevis)	NM_001077702.2,NM_020948.3,NM_001146111.1,NM_001146113.1,NM_001146112.1,NM_001146110.1,NM_001077704.2,NM_001077703.2,NM_001077701.2,NM_001077700.2
TANK	PH_hs_0044522	114	190	304	362	0.00027816	5.16255e-05	2.9097e-05	8.15408e-06	0	0	0	0	2.19607e-07	1.38248e-15	150.482	332.898	0.197976	0.126565	0.561366	0.125916	TRAF family member-associated NFKB activator	NM_133484.1
SLC22A15	PH_hs_0001888	52	102	205	207	0.00344901	0.00160966	4.06445e-05	3.95131e-05	-50	0	0	0	9.07261e-05	7.69587e-29	75.944	205.999	0.267127	0.0902388	0.560874	0.0143621	solute carrier family 22, member 15	NM_018420.2
SELM	PH_hs_0003651	443	611	1074	1234	5.03478e-06	2.61034e-06	1.11038e-06	1.75793e-06	0	0	0	0	4.83014e-14	1.62472e-20	524.118	1153.72	0.13431	0.108573	0.560323	0.0204475	selenoprotein M	NM_080430.2
WDR73	PH_hs_0002576	251	359	694	751	0.161317	8.31325e-06	2.09044e-06	1.83206e-06	0	0	0	0	0.000335972	1.85316e-26	303.063	722.405	0.29405	0.0945218	0.560013	0.170159	WD repeat domain 73	NM_032856.2
KIAA0430	PH_hs_0030165	571	745	1415	1450	2.98563e-06	1.85549e-06	8.22186e-07	8.07018e-07	0	0	0	0	2.02392e-17	6.51161e-38	655.293	1432.46	0.118885	0.0780161	0.559678	0.00611896	KIAA0430	NM_001184999.1,NM_001184998.1,NM_014647.3
NLE1	PH_hs_0004829	121	148	283	308	0.000233202	0.000116668	1.58992e-05	1.23941e-05	0	0	0	0	3.47522e-16	2.76519e-22	134.16	295.458	0.123894	0.103757	0.55923	0.0153716	notchless homolog 1 (Drosophila)	NM_018096.3,NM_001014445.1
CD72	PH_hs_0006382	119	124	271	253	0.000270894	0.000210049	1.77218e-05	0.000851178	0	0	0	0	3.19126e-18	1.227e-17	121.677	262.037	0.115936	0.118064	0.559222	0.0557065	CD72 molecule	NM_001782.2
C1orf198	PH_hs_0002369	1674	1848	3734	3667	7.0632e-07	6.52234e-07	4.40136e-07	4.39565e-07	0	0	0	0	1.30881e-42	1.11703e-37	1761.03	3700.67	0.0733618	0.0782721	0.559175	0.00255478	chromosome 1 open reading frame 198	NM_001136495.1,NM_001136494.1,NM_032800.2
C12orf45	PH_hs_0015316	47	76	145	151	0.00453056	0.00187707	0.000124426	0.000108757	-50	0	0	0	3.57894e-06	4.76265e-22	60.9293	147.991	0.22277	0.104363	0.559046	0.0170842	chromosome 12 open reading frame 45	NM_152318.2
BEST1	PH_hs_0045864	132	146	304	310	0.000170385	0.000121616	1.287e-05	1.21719e-05	0	0	0	0	7.93696e-25	6.46311e-31	138.996	306.993	0.0978323	0.0869433	0.558938	0.00539151	bestrophin 1	NM_001139443.1,NM_004183.3
BRIX1	PH_hs_0002981	4276	6073	9787	10452	4.14313e-07	3.7237e-07	3.37565e-07	3.34112e-07	0	0	0	0	5.41795e-14	1.03695e-31	5142.52	10118.4	0.134584	0.0857735	0.558452	0.0136132	BRX1, biogenesis of ribosomes, homolog (S. cerevisiae)	NM_018321.3
R3HCC1L	PH_hs_0033262	124	149	276	326	0.000209689	0.000113681	1.67656e-05	1.06437e-05	0	0	0	0	2.16498e-17	3.71085e-16	136.215	300.912	0.118997	0.124018	0.557933	0.0211849	R3H domain and coiled-coil containing 1-like	NM_014472.4,NM_001256621.1,NM_001256620.1,NM_138469.2,NM_001256619.1
POLR1E	PH_hs_0002184	340	454	850	928	0.0110708	4.76981e-06	1.51662e-06	1.34013e-06	0	0	0	0	5.26737e-10	7.18003e-26	395.142	888.869	0.163905	0.0956763	0.557773	0.0529499	polymerase (RNA) I polypeptide E, 53kDa	NM_022490.1
BHLHE40	PH_hs_0010283	2658	3524	6250	6213	5.13326e-07	5.58271e-07	3.69628e-07	3.70207e-07	0	0	0	0	1.39837e-17	3.9242e-41	3077.07	6231.65	0.118277	0.0747349	0.557572	0.00595361	basic helix-loop-helix family, member e40	NM_003670.2
UBE2D3	PH_hs_0024881	11670	14364	26665	23220	3.28872e-07	3.20571e-07	3.04526e-07	3.19802e-07	0	0	0	0	1.11723e-24	6.72693e-21	12982.1	24949.2	0.098151	0.107474	0.557164	0.0110117	ubiquitin-conjugating enzyme E2D 3	NM_181892.2,NM_181888.2,NM_181886.2,NM_003340.5,NM_181893.1,NM_181891.1,NM_181890.1,NM_181889.1,NM_181887.1
GNA13	PH_hs_0001001	355	325	730	787	8.54553e-06	1.07339e-05	0.000989096	5.04178e-05	0	0	0	0	6.66104e-15	2.91567e-17	341.592	758.406	0.129825	0.119494	0.557057	0.0891627	guanine nucleotide binding protein (G protein), alpha 13	NM_006572.4
FNDC3B	PH_hs_0015451	457	556	1084	1136	4.7207e-06	3.12257e-06	1.0978e-06	1.03854e-06	0	0	0	0	1.60061e-22	1.25018e-32	505.288	1109.92	0.103158	0.0844779	0.556898	0.0019641	fibronectin type III domain containing 3B	NM_001135095.1,NM_022763.3
SUGP1	PH_hs_0020461	1203	1834	3007	3317	9.73109e-07	6.56083e-07	4.81044e-07	4.59116e-07	0	0	0	0	4.50976e-11	2.72692e-26	1506.53	3161.47	0.154261	0.0948468	0.55688	0.0286671	SURP and G patch domain containing 1	NM_172231.3
IP6K1	PH_hs_0037194	987	1010	2122	2189	1.23479e-06	1.19867e-06	5.8998e-07	5.77744e-07	0	0	0	0	1.25623e-26	2.58293e-37	1000.4	2155.41	0.0941979	0.0786747	0.556561	0.00693646	inositol hexakisphosphate kinase 1	NM_001242829.1,NM_001006115.2,NM_153273.3
PBLD	PH_hs_0044520	103	131	248	256	0.000390661	0.000174538	2.28239e-05	2.08165e-05	0	0	0	0	1.48759e-13	1.73997e-27	116.592	251.989	0.137071	0.0926012	0.556331	0.0275295	phenazine biosynthesis-like protein domain containing	NM_001033083.1
FSD1L	PH_hs_0044581	165	185	395	389	8.15021e-05	5.62291e-05	6.56889e-06	6.82079e-06	0	0	0	0	1.55297e-25	5.78271e-31	174.936	392.016	0.096353	0.0868708	0.555812	0.00672488	fibronectin type III and SPRY domain containing 1-like	NM_031919.3
C7orf62	PH_hs_0006202	52	78	153	151	0.00338427	0.00126962	0.000104186	0.00010881	-50	0	0	0	2.61253e-07	1.38716e-23	64.5128	152.006	0.199288	0.100599	0.555506	0.0239542	chromosome 7 open reading frame 62	NM_152706.3
ELOF1	PH_hs_0023793	798	1540	2109	2770	1.66625e-06	7.59597e-07	5.92443e-07	5.02155e-07	0	0	0	0	1.30497e-06	3.18427e-13	1153.39	2438.32	0.212795	0.139037	0.555366	0.123054	elongation factor 1 homolog (S. cerevisiae)	NM_032377.3
MIER3	PH_hs_0048867	284	315	629	706	1.54763e-05	1.38156e-05	2.47675e-06	2.0388e-06	0	0	0	0	7.80439e-32	3.99411e-22	299.47	667.368	0.085596	0.104166	0.55526	0.00469732	mesoderm induction early response 1, family member 3	NM_152622.3
C1orf162	PH_hs_0014933	152	178	344	388	0.000106569	0.0324444	1.44276e-05	1.62657e-05	0	0	0	0	1.49951e-09	5.08268e-19	164.761	365.924	0.168587	0.113208	0.554461	0.0891043	chromosome 1 open reading frame 162	NM_174896.2
PHLDA1	PH_hs_0004692	1946	2028	4116	4157	6.27326e-07	6.08862e-07	4.20099e-07	4.25389e-07	0	0	0	0	1.53555e-30	1.1911e-43	1989.89	4136.48	0.0875133	0.072439	0.55389	0.0049367	pleckstrin homology-like domain, family A, member 1	NM_007350.3
HYPK|SERF2-C15ORF63	PH_hs_0026695	1723	1911	3699	3897	6.89647e-07	6.35835e-07	4.38938e-07	4.28944e-07	0	0	0	0	8.26486e-42	1.15373e-33	1816.82	3797.69	0.0740965	0.0830863	0.553755	0.00147523	huntingtin interacting protein K|SERF2-C15orf63 readthrough	NM_001199885.1,NM_016400.3|NR_037673.1
FLJ44838	PH_hs_0044005	182	215	436	449	5.9344e-05	3.50761e-05	5.22717e-06	4.88524e-06	0	0	0	0	4.98582e-21	7.81343e-32	198.17	442.482	0.107108	0.0855967	0.553737	0.00419096	uncharacterized LOC644767	XR_159149.1,XR_111749.1
TTC29	PH_hs_0005378	101	108	224	221	0.000417673	0.00033386	3.09782e-05	3.2464e-05	0	0	0	0	4.60365e-19	6.07174e-27	104.585	222.508	0.113067	0.0936012	0.553588	0.0151833	tetratricopeptide repeat domain 29	NM_031956.2
DBNDD2	PH_hs_0045561	119	89	217	239	0.000284684	0.000637343	3.42591e-05	0.203777	0	0	0	0	4.26414e-07	0.00178878	105.006	227.963	0.203133	0.343266	0.553296	0.334177	dysbindin (dystrobrevin binding protein 1) domain containing 2	NM_018478.3,NM_001048226.2,NM_001048225.2
GSTP1	PH_hs_0035926	1351	2021	3235	3767	8.60694e-07	6.10365e-07	4.64419e-07	4.34766e-07	0	0	0	0	1.04691e-11	1.31823e-20	1673.47	3500.07	0.149269	0.108309	0.553282	0.0307493	glutathione S-transferase pi 1	NM_000852.3
TRIM21	PH_hs_0000135	62	91	142	212	0.00204268	0.000606106	0.00325386	3.66389e-05	-50	0	0	0	3.89707e-08	4.03982e-07	75.9666	176.874	0.186156	0.202699	0.553237	0.136545	tripartite motif containing 21	NM_003141.3
RABL2B|RABL2A	PH_hs_0049491	408	507	919	1089	6.08259e-06	3.76315e-06	1.35856e-06	1.09174e-06	0	0	0	0	2.85567e-20	2.75825e-18	456.166	1003.7	0.109294	0.115712	0.553168	0.0106201	RAB, member of RAS oncogene family-like 2B|RAB, member of RAS oncogene family-like 2A	NM_001130920.1,NM_001130923.1,NM_001130922.1,NM_001130921.1,NM_001130919.1,NM_001003789.1,NM_007081.2|NM_013412.2,NM_007082.3
OR4C46	PH_hs_0060505	83	64	173	195	0.000799306	0.00181895	6.97386e-05	6.71348e-05	0	-50	0	0	6.02621e-07	6.63243e-17	74.1564	183.962	0.205983	0.120902	0.552606	0.0178396	olfactory receptor, family 4, subfamily C, member 46	NM_001004703.1
TRIP13	PH_hs_0020488	815	1168	2049	2159	1.74526e-06	1.00601e-06	6.14558e-07	5.83092e-07	0	0	0	0	5.3002e-13	6.18592e-33	985.156	2103.83	0.140401	0.0840598	0.552416	0.0167972	thyroid hormone receptor interactor 13	NM_004237.3
FAM196A	PH_hs_0009039	194	234	456	496	4.84645e-05	2.71542e-05	5.07566e-06	3.94027e-06	0	0	0	0	1.08635e-19	2.24782e-24	213.534	475.933	0.111059	0.0988124	0.552185	0.00612366	family with sequence similarity 196, member A	NM_001039762.2
ANKRD29	PH_hs_0018161	122	168	275	367	0.000223506	7.69061e-05	1.69712e-05	7.86308e-06	0	0	0	0	2.21961e-11	3.95625e-11	144.213	320.836	0.151777	0.153793	0.551846	0.0787682	ankyrin repeat domain 29	NM_173505.2
GNG5	PH_hs_0028433	635	859	1568	1649	2.43376e-06	1.49352e-06	0.000167117	7.15457e-07	0	0	0	0	1.90077e-15	3.61069e-25	743.267	1608.37	0.127205	0.0971097	0.551832	0.0378054	guanine nucleotide binding protein (G protein), gamma 5	NM_005274.2
FRS2	PH_hs_0023008	87	94	192	188	0.000688371	0.000533283	5.31761e-05	5.3363e-05	0	0	0	0	1.57919e-18	1.36559e-24	90.55	190.01	0.114868	0.0983396	0.551684	0.0190593	fibroblast growth factor receptor substrate 2	NM_001042555.1,NM_006654.3
RABEPK	PH_hs_0001676	1118	1688	3070	2783	1.05813e-06	7.01434e-07	4.76147e-07	5.00621e-07	0	0	0	0	2.42423e-11	1.88775e-24	1392.27	2927.07	0.152079	0.098646	0.55157	0.0358339	Rab9 effector protein with kelch motifs	NM_001174153.1,NM_001174152.1,NM_005833.3
DNAJB1	PH_hs_0042409	2820	5464	7412	8703	4.9712e-07	3.8351e-07	3.55417e-07	1.58813e-06	0	0	0	0	1.09813e-06	2.93122e-19	4086.33	8055.24	0.211217	0.112428	0.551399	0.123443	DnaJ (Hsp40) homolog, subfamily B, member 1	NM_006145.1
COBRA1	PH_hs_0028357	780	890	1751	1820	0.195146	1.42915e-06	9.01442e-07	6.6003e-07	0	0	0	0	0.000420267	5.44945e-35	834.329	1785.4	0.299483	0.0813998	0.551308	0.159789	cofactor of BRCA1	NM_015456.3
E2F2	PH_hs_0012692	320	388	731	828	1.1182e-05	6.85721e-06	6.20895e-06	1.57788e-06	0	0	0	0	1.40224e-21	7.13341e-21	353.183	779.333	0.105599	0.107546	0.551201	0.00773015	E2F transcription factor 2	NM_004091.3
PDE4DIP|LOC101060291|LOC101060463|LOC100996724	PH_hs_0034072	1271	1499	2937	2907	9.16783e-07	7.78497e-07	4.87057e-07	4.89339e-07	0	0	0	0	7.46871e-29	3.04855e-39	1382.75	2922.09	0.090217	0.0766098	0.55114	0.00148884	phosphodiesterase 4D interacting protein|myomegalin-like|myomegalin-like|myomegalin-like	NM_001198834.2,NM_001198832.1,NM_014644.4|XM_003960250.1,XM_003960249.1,XM_003960247.1,XM_003960246.1,XM_003960245.1,XM_003960243.1,XM_003960242.1,XM_003960241.1,XM_003960239.1|XR_171193.1|XM_003846489.1,XM_003846735.1
TSR2	PH_hs_0010590	207	232	485	492	3.98778e-05	2.78366e-05	4.13439e-06	4.0074e-06	0	0	0	0	1.13449e-27	2.55118e-35	219.421	488.494	0.0922663	0.0809961	0.55019	0.00365986	TSR2, 20S rRNA accumulation, homolog (S. cerevisiae)	NM_058163.1
BAG6	PH_hs_0028463	603	827	1388	1459	2.67486e-06	0.29391	8.38121e-07	7.98427e-07	0	0	0	0	0.038933	1.102e-32	711.188	1423.39	0.567149	0.0844025	0.549807	0.203182	BCL2-associated athanogene 6	NM_001098534.1,NM_080703.2,NM_080702.2,NM_004639.3,NM_001199698.1,NM_001199697.1
TFDP1	PH_hs_0004593	6430	8790	14524	14695	3.67224e-07	3.43794e-07	3.2019e-07	3.1977e-07	0	0	0	0	5.44032e-16	4.90454e-44	7570.03	14609.4	0.124743	0.072106	0.549788	0.00789591	transcription factor Dp-1	NM_007111.4,NR_026580.1
NGDN	PH_hs_0000954	3090	3422	6045	7106	4.74646e-07	4.53467e-07	3.74544e-07	3.59004e-07	0	0	0	0	2.21405e-43	5.34581e-20	3255.8	6573.64	0.0726727	0.110112	0.549331	0.0071285	neuroguidin, EIF4E binding protein	NM_001042635.1,NM_015514.1
UTP11L	PH_hs_0031532	3397	5074	7656	8985	4.54218e-07	3.91515e-07	3.53029e-07	3.42461e-07	0	0	0	0	5.77204e-12	3.489e-20	4204.19	8318.18	0.147366	0.109553	0.549174	0.0332631	UTP11-like, U3 small nucleolar ribonucleoprotein, (yeast)	NM_016037.3
BLOC1S1|BLOC1S1-RDH5	PH_hs_0062201	1580	1718	3576	3343	7.4234e-07	6.91295e-07	4.44295e-07	4.57493e-07	0	0	0	0	1.45067e-38	1.42883e-28	1649.65	3459.97	0.0773168	0.0906933	0.549042	0.00740003	biogenesis of lysosomal organelles complex-1, subunit 1|BLOC1S1-RDH5 readthrough	NM_001487.3,NR_037656.1,NR_037657.1,NR_037655.1|NR_037658.1
LAMTOR3	PH_hs_0037100	1110	1329	2543	2621	1.06714e-06	8.75146e-07	5.26398e-07	5.23848e-07	0	0	0	0	1.62683e-26	8.53984e-38	1217.06	2581.89	0.0944129	0.0781444	0.548821	0.000732287	late endosomal/lysosomal adaptor, MAPK and MTOR activator 3	NM_001243736.1,NM_021970.3,NR_024170.1
KLF6	PH_hs_0029628	139	157	312	340	0.000232482	0.152614	1.19814e-05	9.54656e-06	0	0	0	0	6.75863e-05	1.22132e-22	147.918	325.953	0.261997	0.102865	0.548721	0.193585	Kruppel-like factor 6	NR_027653.1,NM_001160125.1,NM_001160124.1,NM_001300.5
SPATA2	PH_hs_0028894	197	203	427	466	4.60922e-05	4.33515e-05	5.47702e-06	4.73386e-06	0	0	0	0	8.12159e-21	8.97247e-24	200.347	446.435	0.107706	0.100162	0.548503	0.0116348	spermatogenesis associated 2	NM_006038.3,NM_001135773.1
SDC4	PH_hs_0029525	1344	1762	3118	3367	6.49073e-06	6.7721e-07	4.7258e-07	4.56019e-07	0	0	0	0	2.97905e-17	2.64407e-29	1546.43	3242.09	0.119531	0.0894699	0.548348	0.00704052	syndecan 4	NM_002999.3
ACHE	PH_hs_0009299	157	197	379	406	9.56996e-05	4.60487e-05	7.26851e-06	6.1604e-06	0	0	0	0	4.37371e-16	2.03531e-25	176.442	392.456	0.124328	0.0965936	0.548287	0.0134863	acetylcholinesterase	NM_015831.2
CLN5	PH_hs_0002596	686	1269	1873	2209	2.12667e-06	9.18409e-07	6.45562e-07	5.7442e-07	0	0	0	0	4.34673e-07	2.85577e-19	965.385	2040.41	0.203288	0.112391	0.547666	0.100883	ceroid-lipofuscinosis, neuronal 5	NM_006493.2
GPR107	PH_hs_0036399	1075	1329	2493	2588	1.10909e-06	8.75232e-07	5.32564e-07	5.21106e-07	0	0	0	0	8.73742e-23	3.40243e-36	1198.65	2540.36	0.102506	0.0799529	0.547455	0.00156893	G protein-coupled receptor 107	NM_001136558.1,NM_001136557.1,NM_020960.4
SEC61A2	PH_hs_0034879	373	431	861	885	7.56231e-06	5.35856e-06	1.48893e-06	0.0837453	0	0	0	0	1.08785e-27	1.56751e-07	401.551	872.968	0.0922336	0.195498	0.546869	0.158867	Sec61 alpha 2 subunit (S. cerevisiae)	NM_001142627.1,NR_024577.1,NR_024576.1
AOC2	PH_hs_0044469	113	132	271	257	0.000286788	0.000170627	1.76851e-05	2.05745e-05	0	0	0	0	1.30411e-18	1.97422e-23	122.33	264.029	0.114583	0.100956	0.546096	0.0208751	amine oxidase, copper containing 2 (retina-specific)	NM_009590.2,NM_001158.3
IFT52	PH_hs_0002199	277	475	696	972	1.72259e-05	4.31723e-06	2.07958e-06	1.53416e-05	0	0	0	0	8.60716e-08	5.6202e-10	371.995	833.505	0.191309	0.164184	0.545952	0.139786	intraflagellar transport 52 homolog (Chlamydomonas)	NM_016004.2
ARL8B	PH_hs_0032431	2133	2449	4433	4915	0.178355	5.3824e-07	4.09072e-07	3.95389e-07	0	0	0	0	0.000184032	7.23014e-26	2288.81	4673.18	0.280743	0.0956823	0.545626	0.158862	ADP-ribosylation factor-like 8B	NM_018184.2
ZSCAN21	PH_hs_0031048	210	232	485	496	3.81654e-05	2.7884e-05	4.13836e-06	3.94265e-06	0	0	0	0	7.2528e-30	9.77638e-34	221	490.486	0.0885646	0.0829921	0.545562	0.00413991	zinc finger and SCAN domain containing 21	NM_145914.2
SRP19	PH_hs_0035321	200	336	568	631	0.000136647	1.16097e-05	2.99735e-06	0.354585	0	0	0	0	1.10519e-07	0.0852081	265.273	599.393	0.193024	0.729465	0.545066	0.0890479	signal recognition particle 19kDa	NM_001204196.1,NM_001204193.1,NM_003135.2
FAM167A	PH_hs_0023780	1082	1090	2304	2341	1.10025e-06	1.0905e-06	1.32208e-06	5.5454e-07	0	0	0	0	7.60142e-25	9.20404e-40	1088.5	2322.46	0.0977922	0.07608	0.544975	0.0124862	family with sequence similarity 167, member A	NM_053279.2
NSUN2	PH_hs_0024072	500	678	1291	1253	3.87384e-06	2.16979e-06	9.01808e-07	9.30929e-07	0	0	0	0	5.11395e-15	2.049e-33	586.022	1272.09	0.129259	0.0834155	0.544932	0.0164325	NOP2/Sun RNA methyltransferase family, member 2	NR_037947.1,NM_001193455.1,NM_017755.5
MKI67IP	PH_hs_0029891	248	297	557	652	0.19388	0.120246	4.30741e-06	2.32217e-06	0	0	0	0	0.0038708	3.02101e-18	271.954	604.334	0.375497	0.115851	0.544685	0.369565	MKI67 (FHA domain) interacting nucleolar phosphoprotein	NM_032390.4
CLEC2B	PH_hs_0029022	2629	3271	5823	5976	5.16493e-07	0.000262633	3.7644e-07	4.27718e-07	0	0	0	0	3.85689e-17	1.53171e-39	2941.31	5899.3	0.119968	0.076304	0.544684	0.00867166	C-type lectin domain family 2, member B	NM_005127.2
PNP	PH_hs_0004336	1365	1549	2990	3121	8.51827e-07	7.55572e-07	4.82398e-07	4.72363e-07	0	0	0	0	8.242e-36	2.76831e-35	1456.03	3055.3	0.0804061	0.0810393	0.543925	0.00103385	purine nucleoside phosphorylase	NM_000270.3
PIP4K2A	PH_hs_0003680	449	755	1163	1412	4.88826e-06	1.81635e-06	1.01132e-06	8.23874e-07	0	0	0	0	2.16707e-08	6.58174e-17	595.862	1287.06	0.182593	0.120888	0.543709	0.083428	phosphatidylinositol-5-phosphate 4-kinase, type II, alpha	NM_005028.4
TMEM171	PH_hs_0009849	175	257	457	466	6.71767e-05	0.00942533	0.0242129	4.50065e-06	0	0	0	0	5.08703e-07	6.84745e-13	214.491	461.49	0.204573	0.141101	0.542977	0.281224	transmembrane protein 171	NM_173490.6,NM_001161342.1
PRRX1	PH_hs_0048069	104	193	277	363	0.000379965	4.92388e-05	1.6602e-05	8.07864e-06	0	0	0	0	4.22954e-06	1.05234e-11	146.649	319.847	0.224556	0.149286	0.54286	0.19171	paired related homeobox 1	NM_006902.3,NM_022716.2
RDH10	PH_hs_0023990	627	759	1502	1485	2.491e-06	1.80121e-06	7.77171e-07	7.85308e-07	0	0	0	0	5.92828e-24	1.16248e-37	691.428	1493.55	0.0997523	0.0782911	0.542663	0.00338554	retinol dehydrogenase 10 (all-trans)	NM_172037.4
MID1	PH_hs_0048073	311	504	764	1006	1.2078e-05	3.80975e-06	1.78271e-06	1.20663e-06	0	0	0	0	7.45454e-09	1.20636e-12	403.698	884.568	0.176597	0.142688	0.541738	0.0879445	midline 1 (Opitz/BBB syndrome)	NM_001193277.1,NM_033289.1,NM_000381.3,NM_033290.3,NM_001098624.2
TMEM87A	PH_hs_0022976	948	1130	2126	2288	1.30468e-06	1.04559e-06	5.89403e-07	5.61366e-07	0	0	0	0	8.74164e-27	1.91923e-29	1037.04	2206.73	0.0938989	0.0892431	0.541725	0.00118673	transmembrane protein 87A	NM_015497.3
CCDC9	PH_hs_0048626	182	227	424	522	5.92127e-05	3.24002e-05	5.56652e-06	0.0154732	0	0	0	0	5.12047e-17	4.69429e-08	203.885	472.827	0.120454	0.18733	0.54168	0.163208	coiled-coil domain containing 9	NM_015603.2
RNF32	PH_hs_0029217	135	160	344	304	0.000166685	9.01997e-05	9.25654e-06	1.28312e-05	0	0	0	0	8.64235e-19	3.45996e-18	147.243	324.078	0.113977	0.11606	0.541466	0.0334619	ring finger protein 32	NM_030936.3,NM_001184997.1,NM_001184996.1
PCGF5	PH_hs_0023213	201	244	468	520	0.00605438	2.39475e-05	4.45857e-06	3.89037e-06	0	0	0	0	2.37503e-13	3.12587e-22	221.98	493.911	0.138269	0.103893	0.541121	0.0389659	polycomb group ring finger 5	NM_001256549.1,NM_032373.4,NM_001257101.1
EIF5	PH_hs_0060851	2805	3286	6253	5971	5.01037e-07	4.61081e-07	3.69587e-07	3.73956e-07	0	0	0	0	5.58648e-31	2.21069e-32	3041.06	6112.6	0.0868483	0.0848212	0.540973	0.00297045	eukaryotic translation initiation factor 5	NM_183004.4,NM_001969.4
DAAM1	PH_hs_0024003	47	81	136	178	0.0099933	0.0188486	0.00016035	6.41007e-05	-50	0	0	0	0.000163503	2.29415e-10	63.3108	156.925	0.278326	0.160447	0.54089	0.1069	dishevelled associated activator of morphogenesis 1	NM_001270520.1,NM_014992.2
CD163L1	PH_hs_0031228	320	395	752	809	1.11793e-05	6.5738e-06	1.83177e-06	1.63198e-06	0	0	0	0	4.84087e-20	1.79896e-27	356.517	780.406	0.109981	0.0926275	0.540584	0.00460314	CD163 molecule-like 1	NM_174941.4
RALGAPB	PH_hs_0047529	199	307	464	653	4.79892e-05	1.33338e-05	4.54293e-06	2.31575e-06	0	0	0	0	2.15901e-09	3.2863e-10	250.934	558.161	0.170313	0.161916	0.540493	0.103299	Ral GTPase activating protein, beta subunit (non-catalytic)	NM_020336.2
PTP4A2	PH_hs_0044633	1834	2194	3942	4346	6.79128e-07	5.76868e-07	4.2703e-07	4.12031e-07	0	0	0	0	2.45603e-27	1.57121e-26	2010.02	4143.32	0.0928738	0.0943839	0.540446	0.00231063	protein tyrosine phosphatase type IVA, member 2	NM_001195100.1,NM_080391.3,NM_001195101.1
KEAP1	PH_hs_0003698	137	234	375	428	0.000150319	2.71783e-05	7.45253e-06	5.44372e-06	0	0	0	0	2.87971e-07	2.61853e-19	183.541	401.408	0.200035	0.11227	0.540362	0.12167	kelch-like ECH-associated protein 1	NM_203500.1,NM_012289.3
PARP12	PH_hs_0030998	63	80	154	155	0.00191778	0.00124044	0.000102062	0.000100282	-50	0	0	0	4.52541e-11	4.95677e-26	71.2535	154.5	0.154273	0.0953562	0.540275	0.0237496	poly (ADP-ribose) polymerase family, member 12	NM_022750.2
KRT80	PH_hs_0008361	60	103	200	210	0.0022138	0.000392857	0.000107816	3.77416e-05	-50	0	0	0	3.39152e-06	1.09121e-22	80.6298	204.984	0.222203	0.102744	0.540252	0.0128469	keratin 80	NM_001081492.1,NM_182507.2
TOMM20	PH_hs_0004283	1580	2911	4248	4722	7.43043e-07	4.88975e-07	4.15455e-07	4.00491e-07	0	0	0	0	2.8412e-07	1.57807e-25	2217.88	4484.19	0.199932	0.0963672	0.53994	0.0968433	translocase of outer mitochondrial membrane 20 homolog (yeast)	NM_014765.2
PTPN1	PH_hs_0061737	1941	2245	4375	4211	6.28512e-07	5.79189e-07	4.10953e-07	4.23157e-07	0	0	0	0	9.52842e-33	1.29933e-33	2090.61	4293.36	0.0843158	0.0831541	0.539417	0.00289026	protein tyrosine phosphatase, non-receptor type 1	NM_002827.2
RPL9	PH_hs_0043851	2905	3634	6470	6535	4.89656e-07	4.41214e-07	3.66507e-07	3.65628e-07	0	0	0	0	1.6954e-22	4.2039e-44	3259.43	6502.47	0.10322	0.0720532	0.538732	0.00274522	ribosomal protein L9	NM_001024921.2
RBM15B	PH_hs_0031372	62	76	116	153	0.00200454	0.00106994	0.293414	0.00112291	-50	0	0	0	2.5021e-12	0.0178365	68.8221	134.434	0.144813	0.476046	0.538252	0.40601	RNA binding motif protein 15B	NM_013286.4
SUMO3	PH_hs_0031377	126	297	454	434	0.000199	1.36727e-05	4.76641e-06	5.2736e-06	0	0	0	0	0.000129385	3.52552e-27	207.76	444.043	0.273716	0.0931623	0.538077	0.253045	SMT3 suppressor of mif two 3 homolog 3 (S. cerevisiae)	NM_006936.2
EIF3C|EIF3CL	PH_hs_0024451	93	130	201	217	0.00055361	0.28198	4.33368e-05	3.41003e-05	0	0	0	0	0.0338428	3.69148e-21	110.854	208.974	0.547317	0.106745	0.537614	0.324032	eukaryotic translation initiation factor 3, subunit C|eukaryotic translation initiation factor 3, subunit C-like	NM_001267574.1,NM_001199142.1,NM_001037808.1,NM_003752.3|XM_003960655.1,NM_001099661.1
EIF3L	PH_hs_0043273	2582	4620	6757	7201	5.21959e-07	4.03539e-07	8.39236e-07	3.57625e-07	0	0	0	0	9.70038e-08	3.91854e-31	3559.11	6978.28	0.192123	0.0866187	0.537548	0.0890547	eukaryotic translation initiation factor 3, subunit L	NM_001242923.1,NM_016091.3
ADORA3	PH_hs_0031122	102	97	157	270	0.000404217	0.000478294	9.58217e-05	2.2903e-05	0	0	0	0	1.82055e-12	3.47542e-06	99.8717	213.296	0.143875	0.22246	0.537454	0.163918	adenosine A3 receptor	NM_000677.3
CPA4	PH_hs_0005148	1811	1937	3713	4034	6.6263e-07	6.29474e-07	5.01027e-07	4.23312e-07	0	0	0	0	3.2862e-35	2.05e-28	1875.51	3872.96	0.0811301	0.0909616	0.537376	0.00488136	carboxypeptidase A4	NM_001163446.1,NM_016352.3
CYB5R3	PH_hs_0014170	310	493	776	955	1.21723e-05	5.47682e-06	1.78909e-06	1.28955e-06	0	0	0	0	3.66233e-09	9.89019e-16	397.932	865.184	0.172911	0.125902	0.537357	0.0708986	cytochrome b5 reductase 3	NM_001171661.1,NM_001171660.1,NM_000398.6,NM_007326.4,NM_001129819.2
DAZAP2	PH_hs_0040466	54	74	119	165	0.0030311	0.0022415	0.000678002	8.12985e-05	-50	0	0	0	1.52423e-08	1.44516e-08	63.66	141.918	0.18055	0.180247	0.537341	0.104366	DAZ associated protein 2	NM_001136269.1
ZNF800	PH_hs_0060716	93	110	195	220	0.000548334	0.22226	4.75267e-05	3.27519e-05	0	0	0	0	0.00294929	1.11217e-17	101.328	207.457	0.363192	0.117905	0.537288	0.285219	zinc finger protein 800	NM_176814.3
CIDECP|CIDEC	PH_hs_0049658	414	485	962	923	6.00085e-06	4.12895e-06	1.28088e-06	0.0865711	0	0	0	0	2.27249e-26	2.62784e-07	448.845	942.584	0.094693	0.199333	0.537279	0.173647	cell death-inducing DFFA-like effector c pseudogene|cell death-inducing DFFA-like effector c	NR_002786.1|NM_001199552.1,NM_001199551.1,NM_022094.3,NM_001199623.1
FAM107B	PH_hs_0005741	700	752	1551	1573	2.05787e-06	1.8464e-06	7.54774e-07	7.45346e-07	0	0	0	0	2.7305e-33	1.11916e-40	726.505	1561.98	0.0835815	0.0751738	0.537038	0.00452097	family with sequence similarity 107, member B	NM_031453.2
VAPB	PH_hs_0010780	384	448	875	933	7.03222e-06	5.17968e-06	1.45454e-06	1.33046e-06	0	0	0	0	1.65395e-26	3.52926e-29	415.436	903.906	0.0944267	0.0896758	0.537018	0.00150237	VAMP (vesicle-associated membrane protein)-associated protein B and C	NR_036633.1,NM_001195677.1,NM_004738.4
NARS2	PH_hs_0005031	177	174	373	407	6.47627e-05	6.84328e-05	7.97246e-06	1.65119e-05	0	0	0	0	1.11659e-16	2.68171e-22	176.01	389.943	0.12182	0.103723	0.537016	0.0278705	asparaginyl-tRNA synthetase 2, mitochondrial (putative)	NM_024678.5,NM_001243251.1
ZNF394	PH_hs_0033078	226	269	513	577	3.01852e-05	1.80702e-05	3.67312e-06	2.90667e-06	0	0	0	0	1.25703e-21	2.02479e-21	247.042	544.89	0.105472	0.10603	0.536826	0.00780632	zinc finger protein 394	NM_032164.2
SMIM13	PH_hs_0003180	106	120	229	251	0.000360125	0.000234399	2.89521e-05	2.20419e-05	0	0	0	0	2.10461e-20	1.35712e-20	112.931	239.963	0.108902	0.108346	0.53666	0.0119027	small integral membrane protein 13	NM_001135575.1
ZNF16	PH_hs_0031076	392	477	898	986	6.69026e-06	4.27838e-06	1.40225e-06	1.23643e-06	0	0	0	0	5.27368e-22	2.68644e-25	433.458	941.851	0.104478	0.0968425	0.536481	0.00430752	zinc finger protein 16	NM_001029976.2,NM_006958.2
TMED3	PH_hs_0019809	15591	18310	31021	32096	3.17783e-07	4.906e-07	3.01958e-07	3.01435e-07	0	0	0	0	6.6685e-31	2.35479e-38	16924.8	31557	0.0869637	0.0775404	0.536112	0.000525871	transmembrane emp24 protein transport domain containing 3	NM_007364.2
TAB2	PH_hs_0040402	968	1430	2521	2469	1.60787e-06	8.13838e-07	2.3532e-06	5.35611e-07	0	0	0	0	5.91201e-12	1.68979e-34	1190.45	2495.13	0.147442	0.082013	0.535613	0.0357054	TGF-beta activated kinase 1/MAP3K7 binding protein 2	NM_015093.4
IGHMBP2	PH_hs_0022095	103	102	203	207	0.205552	0.000404176	4.19214e-05	3.95839e-05	0	0	0	0	0.00246959	2.18025e-27	102.779	204.995	0.355749	0.0927793	0.535458	0.278276	immunoglobulin mu binding protein 2	NM_002180.2
NFE2L1	PH_hs_0027174	1938	2087	4088	4176	6.29269e-07	5.96764e-07	4.2117e-07	4.17866e-07	0	0	0	0	8.66347e-37	1.38902e-40	2013.78	4131.89	0.079267	0.0752652	0.53525	0.00351036	nuclear factor (erythroid-derived 2)-like 1	NM_003204.2
PRMT3	PH_hs_0009167	187	293	440	432	5.42982e-05	0.403308	5.11215e-06	0.0131584	0	0	0	0	0.218328	1.40258e-14	237.952	436.021	1.28559	0.131458	0.535118	0.111594	protein arginine methyltransferase 3	NM_001145167.1,NM_001145166.1,NM_005788.3
TNC	PH_hs_0049197	7909	9813	17025	16643	3.50731e-07	3.37473e-07	3.15095e-07	3.15738e-07	0	0	0	0	1.05083e-23	1.74761e-37	8835.5	16834.9	0.10032	0.0784863	0.534233	0.00267019	tenascin C	NM_002160.3
ATPAF1	PH_hs_0001077	107	160	243	335	0.000346971	9.06815e-05	2.45822e-05	9.92298e-06	0	0	0	0	4.73925e-09	4.43618e-10	132.509	288.835	0.174222	0.163173	0.534081	0.131094	ATP synthase mitochondrial F1 complex assembly factor 1	NM_001256418.1,NM_001243728.1,NM_001042546.2,NM_022745.4
MAP2K1	PH_hs_0022483	1573	1654	3081	3649	7.63929e-07	7.13554e-07	4.75327e-07	4.40468e-07	0	0	0	0	1.10022e-31	3.35228e-19	1615.48	3364	0.0858106	0.112617	0.533827	0.0145375	mitogen-activated protein kinase kinase 1	NM_002755.3
SNX20	PH_hs_0004907	90	104	198	206	0.000611437	0.000378206	4.53274e-05	4.01339e-05	0	0	0	0	1.4596e-17	1.01142e-24	96.8916	201.988	0.118347	0.0980579	0.533595	0.0156387	sorting nexin 20	NM_001144972.1,NM_153337.2
CRB2	PH_hs_0061741	103	107	224	217	0.000391053	0.00034539	3.1009e-05	3.4125e-05	0	0	0	0	4.36398e-17	1.3174e-24	105.161	220.516	0.120179	0.0983057	0.533589	0.0252488	crumbs homolog 2 (Drosophila)	NM_173689.5
OGDH	PH_hs_0045051	63	74	133	147	0.00190801	0.00116615	0.0844254	0.000118856	-50	0	0	0	5.03433e-14	1.01393e-06	68.3957	139.976	0.134409	0.210499	0.533476	0.244238	oxoglutarate (alpha-ketoglutarate) dehydrogenase (lipoamide)	NM_001003941.2
GAD1	PH_hs_0025119	152	203	354	363	0.000106583	0.248483	8.60507e-06	0.138853	0	0	0	0	0.0139384	2.05725e-05	176.669	358.488	0.454749	0.243846	0.533432	0.196124	glutamate decarboxylase 1 (brain, 67kDa)	NM_000817.2
SMEK2	PH_hs_0022451	98	139	246	256	0.000460787	0.000143122	2.36534e-05	2.09284e-05	0	0	0	0	5.36391e-10	2.36812e-26	117.772	250.985	0.163983	0.0947277	0.533174	0.0730525	SMEK homolog 2, suppressor of mek1 (Dictyostelium)	NM_001122964.1,NM_020463.2
SVOPL	PH_hs_0005542	149	91	195	202	0.128116	0.00762	4.77822e-05	0.468517	0	0	0	0	0.0110475	0.377938	121.745	198.49	0.436923	3.21646	0.533059	0.393643	SVOP-like	NM_174959.2,NM_001139456.1
GNL3L	PH_hs_0025678	131	192	314	389	0.000174487	4.99698e-05	1.29215e-05	6.81541e-06	0	0	0	0	6.74115e-10	4.92128e-14	160.379	351.367	0.164975	0.134354	0.533004	0.0865387	guanine nucleotide binding protein-like 3 (nucleolar)-like	NM_001184819.1,NM_019067.5
KHNYN	PH_hs_0033784	80	90	169	180	0.000900922	0.000611385	7.52108e-05	6.1504e-05	0	0	0	0	2.99909e-18	3.28742e-21	84.9616	174.482	0.11584	0.106606	0.532827	0.0144484	KH and NYN domain containing	NM_015299.2
COX19	PH_hs_0044801	163	225	441	474	0.259263	3.06197e-05	5.0894e-06	4.33725e-06	0	0	0	0	0.00696256	1.06963e-25	192.935	457.446	0.406638	0.0960241	0.532775	0.243304	cytochrome c oxidase assembly homolog 19 (S. cerevisiae)	NM_001031617.2
MICAL3	PH_hs_0039625	97	90	181	200	0.000480269	0.000612115	0.467899	4.39987e-05	0	0	0	0	2.33385e-11	0.368767	93.9067	190.468	0.151949	2.98401	0.532259	0.0477463	microtubule associated monoxygenase, calponin and LIM domain containing 3	NM_001136004.1
RPL22L1	PH_hs_0035164	280	308	613	647	0.311633	1.24156e-05	2.59571e-06	2.35714e-06	0	0	0	0	0.0259736	1.54102e-29	294.031	629.946	0.514517	0.0890887	0.532176	0.238535	ribosomal protein L22-like 1	NM_001099645.1
ATAD1	PH_hs_0025428	56	112	215	230	0.0100932	0.000295074	0.466315	0.000163329	-50	0	0	0	8.15036e-05	0.364409	82.8117	222.476	0.265226	2.88435	0.532095	0.368537	ATPase family, AAA domain containing 1	NM_032810.2
DNAJC5	PH_hs_0035632	80	110	175	219	0.000900867	0.00031906	6.97595e-05	3.3159e-05	0	0	0	0	3.866e-10	2.53576e-12	94.4875	196.922	0.162593	0.144853	0.531952	0.0868201	DnaJ (Hsp40) homolog, subfamily C, member 5	NM_025219.2
PPIP5K1	PH_hs_0009470	103	139	244	269	0.000391272	0.000229723	2.39521e-05	1.80672e-05	0	0	0	0	3.21519e-11	2.00591e-20	120.402	256.458	0.15306	0.108841	0.531911	0.0551326	diphosphoinositol pentakisphosphate kinase 1	NM_014659.5,NM_001130858.2,NM_001130859.2,NM_001190214.1
IKZF4	PH_hs_0024473	86	139	206	226	0.336049	0.379441	4.24155e-05	0.481147	0	0	0	0	0.19715	0.428319	111.457	215.966	1.17392	5.53538	0.531724	0.76831	IKAROS family zinc finger 4 (Eos)	NM_022465.3
MCPH1	PH_hs_0061962	166	231	387	484	7.97355e-05	2.81975e-05	6.90746e-06	4.91488e-06	0	0	0	0	7.36675e-12	6.05409e-14	197.371	435.328	0.148137	0.134851	0.531697	0.0592371	microcephalin 1	NM_001172575.1,NM_001172574.1
NFIX	PH_hs_0002882	3476	5283	8281	8604	4.4965e-07	3.86838e-07	3.47602e-07	3.45132e-07	0	0	0	0	2.14744e-11	4.76628e-37	4345.3	8442.02	0.151664	0.0789729	0.531389	0.0334407	nuclear factor I/X (CCAAT-binding transcription factor)	NM_001271044.1,NM_001271043.1,NM_002501.2
PDE4B	PH_hs_0000027	129	138	286	290	0.000183884	0.000146823	1.5176e-05	1.46357e-05	0	0	0	0	3.08555e-21	2.47697e-31	133.607	287.997	0.10653	0.0863243	0.531238	0.0119424	phosphodiesterase 4B, cAMP-specific	NM_001037341.1,NM_001037340.1,NM_001037339.1,NM_002600.3
DMTF1	PH_hs_0045920	864	988	1864	2016	1.48117e-06	1.3052e-06	0.0706671	6.11479e-07	0	0	0	0	6.32927e-33	7.24859e-08	925.206	1939.75	0.0840733	0.190156	0.531193	0.149782	cyclin D binding myb-like transcription factor 1	NM_001142327.1,NM_001142326.1,NM_021145.3,NR_024550.1,NR_024549.1
KLHL28	PH_hs_0035501	323	380	760	767	1.14887e-05	7.22701e-06	1.93036e-06	2.24057e-06	0	0	0	0	1.20623e-24	1.30031e-38	350.951	763.497	0.0982229	0.0772666	0.531039	0.00350388	kelch-like 28 (Drosophila)	NM_017658.3
EPC2	PH_hs_0022040	539	720	1349	1340	3.32218e-06	1.9613e-06	8.62014e-07	1.1414e-06	0	0	0	0	6.41316e-16	4.67411e-38	626.548	1344.53	0.125059	0.0778601	0.530924	0.014455	enhancer of polycomb homolog 2 (Drosophila)	NM_015630.3
YIPF4	PH_hs_0004052	874	1068	1910	2204	1.45717e-06	1.11781e-06	6.36116e-07	5.75138e-07	0	0	0	0	1.15185e-23	4.17159e-21	968.571	2056.49	0.100412	0.106892	0.530855	0.00699325	Yip1 domain family, member 4	NM_032312.3
ALG1	PH_hs_0040277	104	204	327	324	0.000378625	4.12758e-05	1.05701e-05	1.27595e-05	0	0	0	0	1.2234e-05	2.00741e-30	151.888	325.51	0.236986	0.0876921	0.530182	0.207294	asparagine-linked glycosylation 1, beta-1,4-mannosyltransferase homolog (S. cerevisiae)	NM_019109.4
OR2L13	PH_hs_0032393	61	74	141	140	0.18563	0.00177861	0.000136942	0.000140298	-50	0	0	0	0.000514037	1.7932e-23	67.3433	140.504	0.304625	0.100858	0.530146	0.0341903	olfactory receptor, family 2, subfamily L, member 13	NM_175911.2
HNRPLL	PH_hs_0024630	983	1643	2413	2977	1.24548e-06	7.176e-07	5.4306e-07	4.83454e-07	0	0	0	0	8.76063e-09	2.37721e-16	1299.8	2694	0.177467	0.123189	0.530088	0.0779375	heterogeneous nuclear ribonucleoprotein L-like	NM_001142650.1,NM_138394.3
MST4	PH_hs_0002081	848	961	1890	1947	1.52249e-06	1.27859e-06	6.41168e-07	6.27091e-07	0	0	0	0	1.20184e-34	2.10891e-37	903.927	1918.42	0.0818269	0.0785767	0.530041	0.00159071	serine/threonine protein kinase MST4	NM_001042453.1,NM_001042452.1,NM_016542.3
PABPC1L2A	PH_hs_0049517	465	312	797	901	4.56017e-06	1.19617e-05	1.68414e-06	1.39576e-06	0	0	0	0	5.55107e-07	6.17778e-22	393.281	848.821	0.205296	0.104657	0.530005	0.154479	poly(A) binding protein, cytoplasmic 1-like 2A	NM_001012977.2
HCCS	PH_hs_0048675	97	91	188	228	0.000476768	0.000590024	5.33775e-05	0.194974	0	0	0	0	9.57735e-12	0.00338711	94.383	207.93	0.14898	0.369311	0.529848	0.342764	holocytochrome c synthase	NM_001171991.2,NM_005333.4,NM_001122608.2
MUT	PH_hs_0061455	52	100	183	266	0.0442435	0.000430998	5.82479e-05	0.109546	-50	0	0	0	0.000164922	0.00149182	74.9914	224.351	0.2785	0.336766	0.529727	0.309579	methylmalonyl CoA mutase	NM_000255.3
EXOC3	PH_hs_0030371	317	546	852	989	1.14639e-05	3.23617e-06	1.51141e-06	6.58473e-06	0	0	0	0	8.26394e-08	1.18403e-18	426.859	920.261	0.191034	0.11444	0.529391	0.110127	exocyst complex component 3	NM_007277.4
CLDND1	PH_hs_0005965	16076	17266	31411	30627	3.16804e-07	3.14643e-07	3.01766e-07	3.02162e-07	0	0	0	0	6.71585e-38	5.17801e-37	16682.7	31020.9	0.0780307	0.0790135	0.52935	0.0042954	claudin domain containing 1	NM_001040199.1,NM_001040181.1,NM_001040200.1,NM_001040183.1,NM_001040182.1,NM_019895.2
KIF4A	PH_hs_0044814	213	477	501	530	3.61227e-05	0.234433	3.8576e-06	3.43511e-06	0	0	0	0	0.0573031	2.37342e-28	339.272	515.454	0.633785	0.0910712	0.529322	0.287141	kinesin family member 4A	NM_012310.4
ZCCHC9	PH_hs_0061697	2832	4832	6712	8117	4.9601e-07	3.97855e-07	3.63336e-07	3.4895e-07	0	0	0	0	1.4907e-08	6.94779e-18	3791.63	7412.02	0.180423	0.117151	0.528677	0.0845007	zinc finger, CCHC domain containing 9	NM_001131036.1,NM_001131035.1,NM_032280.2
RIOK2	PH_hs_0045177	796	1086	1889	2067	1.67265e-06	1.09534e-06	6.41439e-07	6.04613e-07	0	0	0	0	3.09495e-15	6.42396e-27	936.103	1977.7	0.128205	0.0936471	0.528665	0.0144846	RIO kinase 2	NM_001159749.1
DIRC2	PH_hs_0001098	345	445	818	885	9.24277e-06	4.98408e-06	1.60512e-06	1.43169e-06	0	0	0	0	3.94047e-17	6.10576e-27	393.486	851.389	0.120005	0.0936057	0.528563	0.0100635	disrupted in renal carcinoma 2	NM_032839.2
PTPN1	PH_hs_0025079	1762	2065	3884	3943	6.77218e-07	6.01152e-07	4.29501e-07	4.26989e-07	0	0	0	0	2.29933e-30	3.64478e-42	1910.69	3913.44	0.0877831	0.0737675	0.528489	0.000996515	protein tyrosine phosphatase, non-receptor type 1	NM_002827.2
CHMP5	PH_hs_0025016	6248	7912	12908	14056	3.6966e-07	3.50692e-07	3.24603e-07	3.2135e-07	0	0	0	0	1.36958e-21	1.17477e-28	7056.07	13480.1	0.105572	0.0905488	0.527414	0.00465299	charged multivesicular body protein 5	NM_016410.5,NM_001195536.1
UVRAG	PH_hs_0001261	420	507	969	1025	5.69147e-06	3.76081e-06	1.26463e-06	1.17627e-06	0	0	0	0	4.96678e-23	1.01929e-30	462.481	996.911	0.101909	0.087242	0.527274	0.00301409	UV radiation resistance associated	NM_003369.3
DDX47	PH_hs_0014734	1546	2072	3607	3784	4.42391e-06	5.99747e-07	4.426e-07	4.3398e-07	0	0	0	0	3.93175e-16	1.81638e-34	1800.37	3695.23	0.124126	0.0820527	0.527245	0.0110988	DEAD (Asp-Glu-Ala-Asp) box polypeptide 47	NM_201224.1,NM_016355.3
PRKAB2	PH_hs_0049035	423	474	946	989	5.59694e-06	4.33688e-06	1.30573e-06	1.23155e-06	0	0	0	0	2.5479e-33	1.15344e-32	448.341	967.434	0.0835414	0.0844297	0.527114	0.0023574	protein kinase, AMP-activated, beta 2 non-catalytic subunit	NM_005399.3
CMTM4	PH_hs_0016166	118	137	267	280	0.0096421	0.000151068	1.90672e-05	1.61107e-05	0	0	0	0	2.53919e-13	5.85114e-26	127.343	273.48	0.138443	0.0954991	0.527097	0.047274	CKLF-like MARVEL transmembrane domain containing 4	NM_181521.2,NM_178818.2
RPS6KC1	PH_hs_0002605	398	488	923	983	6.45128e-06	7.6034e-06	1.35005e-06	3.85441e-06	0	0	0	0	7.34936e-21	3.03481e-28	441.855	952.903	0.107583	0.0912559	0.527001	0.00595926	ribosomal protein S6 kinase, 52kDa, polypeptide 1	NM_001136138.1,NM_012424.3
GZF1	PH_hs_0002525	270	283	624	588	1.78604e-05	2.46582e-05	2.51195e-06	2.80464e-06	0	0	0	0	4.36981e-24	1.56354e-26	276.862	606.074	0.0994538	0.0943798	0.526892	0.0188415	GDNF-inducible zinc finger protein 1	NM_022482.3
PTP4A1	PH_hs_0012662	790	904	1871	1726	1.69268e-06	1.39105e-06	6.46228e-07	6.88657e-07	0	0	0	0	1.45705e-32	4.02462e-26	846.259	1798.79	0.0845697	0.0951777	0.526807	0.0101575	protein tyrosine phosphatase type IVA, member 1	NM_003463.3
HNRNPAB	PH_hs_0044441	15258	19531	30556	33571	3.18502e-07	3.11282e-07	3.02196e-07	3.0094e-07	0	0	0	0	9.59011e-21	1.72507e-27	17331.1	32058.4	0.107912	0.0925944	0.526661	0.0067568	heterogeneous nuclear ribonucleoprotein A/B	NM_004499.3,NM_031266.2
UBL5	PH_hs_0024397	561	657	1318	1293	3.06868e-06	2.29203e-06	8.82739e-07	9.00464e-07	0	0	0	0	1.12276e-27	1.30366e-35	608.117	1305.56	0.0922582	0.080644	0.526478	0.0042213	ubiquitin-like 5	NM_001048241.2,NM_024292.3
ZFP106	PH_hs_0022896	164	240	412	503	8.30354e-05	2.52216e-05	5.94785e-06	0.0138495	0	0	0	0	2.26785e-10	2.18084e-08	200.606	457.339	0.160401	0.18263	0.526461	0.215914	zinc finger protein 106 homolog (mouse)	NM_022473.1
STX11	PH_hs_0006562	247	208	523	446	2.7469e-05	4.35597e-05	4.08202e-06	0.00861216	0	0	0	0	9.02867e-11	6.06151e-11	229.037	484.648	0.156813	0.155333	0.526367	0.210293	syntaxin 11	NM_003764.3
DDX5	PH_hs_0014403	9142	10361	17705	19216	3.4143e-07	3.34556e-07	3.13923e-07	3.11702e-07	0	0	0	0	2.45607e-38	3.31531e-29	9745.3	18458	0.0775599	0.0896311	0.526353	0.0025415	DEAD (Asp-Glu-Ala-Asp) box helicase 5	NM_004396.3
SLC35F5	PH_hs_0020692	75	139	217	228	0.00111466	0.000143351	3.41229e-05	2.93347e-05	0	0	0	0	8.36676e-06	2.50738e-24	105.669	222.483	0.232313	0.098917	0.52628	0.199713	solute carrier family 35, member F5	NM_025181.2
RASSF3	PH_hs_0016715	76	84	144	182	0.00109603	0.000800343	0.000127292	5.92172e-05	0	0	0	0	7.99972e-19	1.67224e-11	79.999	162.933	0.113864	0.150817	0.526194	0.0563268	Ras association (RalGDS/AF-6) domain family member 3	NR_040718.1,NM_178169.3
KIAA1191	PH_hs_0000910	618	778	1405	1570	2.55633e-06	1.73424e-06	8.28641e-07	7.46593e-07	0	0	0	0	3.47259e-20	5.16446e-24	695.742	1487.22	0.109547	0.099617	0.525876	0.00778592	KIAA1191	NM_001079685.1,NM_001079684.1,NM_020444.3
NUP160	PH_hs_0031067	298	505	812	892	1.35476e-05	3.79387e-06	1.62286e-06	1.41542e-06	0	0	0	0	4.98955e-08	5.1091e-25	397.334	851.865	0.187719	0.0974262	0.525706	0.0890093	nucleoporin 160kDa	NM_015231.1
DAPK3	PH_hs_0027888	358	491	931	888	8.53054e-06	4.02248e-06	1.3342e-06	1.42477e-06	0	0	0	0	5.76545e-14	1.54122e-29	422.236	909.591	0.134733	0.0890888	0.525344	0.0269386	death-associated protein kinase 3	NM_001348.1
LARP7	PH_hs_0014294	222	255	513	529	3.18718e-05	2.10805e-05	3.67309e-06	3.58991e-06	0	0	0	0	3.58244e-25	1.70665e-32	238.269	520.978	0.0971025	0.0846648	0.525318	0.00337052	La ribonucleoprotein domain family, member 7	NM_001267039.1,NM_015454.2,NM_016648.3,NR_049768.1
ARMC8	PH_hs_0005694	426	537	1035	1029	5.50237e-06	3.34503e-06	1.1622e-06	1.17052e-06	0	0	0	0	2.99319e-19	8.78298e-38	479.927	1032.02	0.112457	0.0781577	0.52526	0.00859319	armadillo repeat containing 8	NM_014154.3,NM_213654.2
TTC27	PH_hs_0043246	378	546	975	1010	7.30847e-06	3.23633e-06	0.116469	0.0408819	0	0	0	0	4.98882e-12	5.9294e-05	458.956	992.449	0.146911	0.259806	0.525241	0.445406	tetratricopeptide repeat domain 27	NM_001193509.1,NM_017735.4
FRG1|LOC642236|FRG1B	PH_hs_0062215	1689	2797	4375	4549	7.01036e-07	4.99276e-07	4.10962e-07	4.05476e-07	0	0	0	0	4.41535e-09	1.75733e-36	2220.93	4461.74	0.173859	0.0796195	0.525171	0.0628103	FSHD region gene 1|FSHD region gene 1 pseudogene|FSHD region gene 1 family, member B	NM_004477.2|NR_033907.1|NR_003579.1
USP36	PH_hs_0028759	862	981	1918	1975	1.48607e-06	1.24489e-06	6.34134e-07	6.20572e-07	0	0	0	0	6.95738e-34	1.57921e-37	920.819	1946.42	0.0827997	0.0784376	0.525142	0.00160378	ubiquitin specific peptidase 36	NM_025090.3
FARP1	PH_hs_0032166	130	207	334	393	0.000179187	4.17235e-05	1.00055e-05	2.30926e-05	0	0	0	0	3.15522e-08	4.02971e-16	166.998	363.397	0.184851	0.124173	0.525105	0.122579	FERM, RhoGEF (ARHGEF) and pleckstrin domain protein 1 (chondrocyte-derived)	NM_005766.2
AGFG1	PH_hs_0060723	535	659	1246	1318	3.37255e-06	2.27877e-06	9.36745e-07	0.135445	0	0	0	0	8.7928e-22	3.24894e-05	595.389	1281.89	0.10506	0.250378	0.524885	0.205939	ArfGAP with FG repeats 1	NM_001135189.1,NM_001135188.1,NM_001135187.1,NM_004504.4
UBE2F	PH_hs_0043184	761	1330	2093	2186	1.79377e-06	1.1001e-06	5.95558e-07	5.78277e-07	0	0	0	0	6.80404e-08	1.12817e-34	1033.9	2139.36	0.189737	0.0817925	0.524874	0.0842281	ubiquitin-conjugating enzyme E2F (putative)	NM_080678.2
TRIM5	PH_hs_0032919	103	139	223	292	0.000519008	0.000144161	3.13828e-05	1.43387e-05	0	0	0	0	2.4652e-11	2.28033e-11	120.402	257.377	0.152137	0.151869	0.524372	0.0950705	tripartite motif containing 5	NM_033092.2,NM_033034.2
TFF1	PH_hs_0035816	180	140	331	366	6.13531e-05	0.00021898	0.0319494	2.76092e-05	0	0	0	0	2.40793e-08	1.1492e-09	161.395	348.441	0.183218	0.167359	0.524354	0.292498	trefoil factor 1	NM_003225.2
RNF181	PH_hs_0035271	4125	6283	8988	10921	4.19801e-07	3.69144e-07	3.42439e-07	3.31945e-07	0	0	0	0	2.40223e-11	1.32524e-17	5163.09	9951.09	0.152048	0.118189	0.524099	0.0525696	ring finger protein 181	NM_016494.3
ZBTB43	PH_hs_0048696	1160	1347	2674	2577	1.01382e-06	0.250414	5.1162e-07	5.22382e-07	0	0	0	0	0.00583629	2.21012e-33	1251.95	2625.71	0.396528	0.0834591	0.523908	0.205835	zinc finger and BTB domain containing 43	NM_001135776.1,NM_014007.3
DYNC1LI2	PH_hs_0024093	219	287	557	539	3.31421e-05	2.22655e-05	3.20441e-06	3.32039e-06	0	0	0	0	8.53669e-15	6.35497e-30	251.932	548.04	0.130362	0.0884737	0.523388	0.0233163	dynein, cytoplasmic 1, light intermediate chain 2	NM_006141.2
PKLR	PH_hs_0005223	129	148	279	318	0.000184009	0.000116376	1.6269e-05	1.13689e-05	0	0	0	0	4.85595e-21	1.94089e-18	138.37	298.433	0.107076	0.115178	0.523155	0.0174767	pyruvate kinase, liver and RBC	NM_181871.3,NM_000298.5
SLC39A9	PH_hs_0048543	792	1186	1963	2144	1.69146e-06	9.88674e-07	6.23455e-07	5.99223e-07	0	0	0	0	1.91682e-11	3.38161e-27	981.628	2053.2	0.151278	0.0931289	0.523085	0.0354665	solute carrier family 39 (zinc transporter), member 9	NM_001252152.1,NM_001252151.1,NM_001252150.1,NM_001252148.1,NM_018375.4
H3F3A|H3F3AP4	PH_hs_0027287	991	1382	1990	3060	1.22861e-06	8.4139e-07	6.172e-07	4.76906e-07	0	0	0	0	2.51389e-14	9.85853e-09	1179.69	2523.07	0.132781	0.178111	0.52284	0.100389	H3 histone, family 3A|H3 histone, family 3A, pseudogene 4	NM_002107.4|NR_002315.1
TTC4|HEATR8-TTC4	PH_hs_0037385	251	319	625	610	2.22419e-05	1.12778e-05	2.50459e-06	2.61869e-06	0	0	0	0	3.90019e-17	6.17895e-32	284.011	617.536	0.119987	0.085451	0.522837	0.0151203	tetratricopeptide repeat domain 4|HEATR8-TTC4 readthrough	NM_004623.4|NR_037639.1,NR_037641.1,NR_037640.1
PPTC7	PH_hs_0001326	382	403	851	888	7.12241e-06	0.0659304	1.52943e-06	1.42447e-06	0	0	0	0	2.73931e-08	1.20245e-32	392.95	869.444	0.183992	0.0844546	0.522678	0.121784	PTC7 protein phosphatase homolog (S. cerevisiae)	NM_139283.1
PCMT1	PH_hs_0060470	938	1736	2616	2767	1.3548e-06	6.85363e-07	5.17935e-07	5.0217e-07	0	0	0	0	3.84514e-07	1.40562e-32	1320.41	2691.26	0.202304	0.0845481	0.522563	0.106323	protein-L-isoaspartate (D-aspartate) O-methyltransferase	NM_001252053.1
SAFB2	PH_hs_0031916	117	143	233	325	0.000254824	0.00110844	2.75875e-05	1.07304e-05	0	0	0	0	6.27761e-14	9.53591e-10	129.674	278.835	0.134938	0.166513	0.522464	0.0973482	scaffold attachment factor B2	NM_014649.2
ISG20L2	PH_hs_0015575	83	137	203	259	0.00124194	0.000152056	4.19139e-05	2.01448e-05	0	0	0	0	5.49444e-07	5.10664e-12	108.926	230.9	0.20521	0.146984	0.522087	0.173688	interferon stimulated exonuclease gene 20kDa-like 2	NM_030980.1
VPS45	PH_hs_0022519	240	489	674	863	2.51618e-05	4.0591e-06	2.19243e-06	1.48476e-06	0	0	0	0	8.88793e-06	1.13402e-13	359.194	768.164	0.233038	0.136389	0.522001	0.184502	vacuolar protein sorting 45 homolog (S. cerevisiae)	NM_007259.3
SASH1	PH_hs_0047689	582	848	1470	1540	2.85975e-06	1.52207e-06	8.31301e-07	8.48859e-07	0	0	0	0	3.75136e-12	3.04503e-33	710.14	1504.89	0.146034	0.0836448	0.521845	0.0324897	SAM and SH3 domain containing 1	NM_015278.3
MKLN1	PH_hs_0022601	61	113	217	277	0.00210624	0.00028803	3.42362e-05	0.420005	-50	0	0	0	1.36612e-05	0.244353	85.9189	246.893	0.238396	1.44432	0.521686	0.344996	muskelin 1, intracellular mediator containing kelch motifs	NM_013255.4,NM_001145354.1
CREB3L2	PH_hs_0060480	1614	1892	3703	3468	7.28721e-07	6.41415e-07	4.378e-07	1.25664e-06	0	0	0	0	3.41451e-30	5.223e-28	1750.42	3585.98	0.0880498	0.0916679	0.521551	0.00755204	cAMP responsive element binding protein 3-like 2	NM_001253775.1
BCCIP	PH_hs_0044592	7389	8675	15139	15288	3.55651e-07	3.44612e-07	3.18754e-07	3.18428e-07	0	0	0	0	3.25713e-31	1.4013e-44	8019.86	15213.4	0.0864996	0.0716162	0.521543	0.000770218	BRCA2 and CDKN1A interacting protein	NM_078468.2,NM_016567.3
USP46	PH_hs_0006038	298	400	702	800	1.35502e-05	6.37584e-06	2.04542e-06	1.66051e-06	0	0	0	0	1.28251e-14	5.79045e-21	347.322	750.831	0.131258	0.107291	0.521281	0.0230424	ubiquitin specific peptidase 46	NM_001134223.1,NM_022832.3
GID8	PH_hs_0048354	357	506	874	967	9.30224e-06	3.77798e-06	1.45722e-06	1.28544e-06	0	0	0	0	1.32006e-12	2.42464e-24	428.855	920.342	0.142946	0.0988849	0.521158	0.0313664	GID complex subunit 8 homolog (S. cerevisiae)	NM_017896.2
NAA50	PH_hs_0015013	678	678	1224	1546	2.17084e-06	2.16955e-06	0.021023	7.56898e-07	0	0	0	0	5.06288e-23	1.33826e-08	679.683	1384.43	0.101929	0.179812	0.521091	0.165885	N(alpha)-acetyltransferase 50, NatE catalytic subunit	NM_025146.2
TMEM41B	PH_hs_0049128	271	394	606	839	1.76577e-05	9.73044e-06	2.65139e-06	1.54576e-06	0	0	0	0	2.97004e-11	7.72145e-11	330.257	722.083	0.152783	0.156227	0.521082	0.0833903	transmembrane protein 41B	NM_015012.3
GDI1	PH_hs_0004253	671	957	1646	1826	2.20865e-06	1.28621e-06	7.16457e-07	0.00840081	0	0	0	0	4.57022e-13	2.09969e-12	808.887	1735.69	0.14	0.144294	0.521061	0.148407	GDP dissociation inhibitor 1	NM_001493.2
NR1D2	PH_hs_0061027	883	953	1913	1960	1.44786e-06	1.29289e-06	6.46332e-07	6.24068e-07	0	0	0	0	3.95545e-35	1.17283e-38	918.533	1936.44	0.0812286	0.0772193	0.520695	0.00513423	nuclear receptor subfamily 1, group D, member 2	NM_001145425.1,NM_005126.4
LIG3	PH_hs_0005604	300	203	518	583	1.3303e-05	4.28831e-05	3.69773e-06	2.95272e-06	0	0	0	0	7.98724e-07	2.40782e-21	254.544	550.388	0.208392	0.106235	0.520549	0.168118	ligase III, DNA, ATP-dependent	NM_013975.3
C9orf78	PH_hs_0014276	142	182	293	418	0.000134029	5.92425e-05	1.4197e-05	5.74831e-06	0	0	0	0	1.37887e-14	1.72092e-09	161.404	355.276	0.13142	0.169233	0.520407	0.0940545	chromosome 9 open reading frame 78	NM_016520.2
JAM3	PH_hs_0025107	115	262	369	387	0.000270398	0.000279675	8.01619e-06	6.9036e-06	0	0	0	0	0.000194018	5.60719e-28	185.301	377.972	0.281842	0.0917222	0.520316	0.257471	junctional adhesion molecule 3	NM_001205329.1,NM_032801.4
LIG3	PH_hs_0044492	135	168	315	341	0.000157882	7.66869e-05	1.22183e-05	9.79866e-06	0	0	0	0	7.7579e-16	2.77073e-23	151.053	327.957	0.125427	0.101303	0.52015	0.0251465	ligase III, DNA, ATP-dependent	NM_013975.3,NM_002311.4
IFT20	PH_hs_0030905	35	106	179	234	0.00975015	0.494309	6.24563e-05	2.7128e-05	-50	0	0	0	0.48461	5.31127e-11	68.9041	206.402	25.916	0.154851	0.519961	0.987353	intraflagellar transport 20 homolog (Chlamydomonas)	NM_001267778.1,NM_001267777.1,NM_001267776.1,NM_001267775.1,NM_174887.3,NM_001267774.1
MRPL30	PH_hs_0035808	189	317	497	584	7.68893e-05	1.14631e-05	3.9206e-06	2.84174e-06	0	0	0	0	8.63276e-08	6.59991e-18	250.435	540.348	0.191329	0.11707	0.519325	0.11339	mitochondrial ribosomal protein L30	NM_145212.3
AR	PH_hs_0061480	109	140	264	262	0.000325554	0.000140325	1.90398e-05	1.94937e-05	0	0	0	0	2.11722e-13	3.31197e-29	124.036	263.007	0.137972	0.0896304	0.519288	0.043169	androgen receptor	NM_001011645.2,NM_000044.3
FTH1	PH_hs_0043869	6078	6656	12356	11968	3.72244e-07	3.64041e-07	3.26392e-07	3.27839e-07	0	0	0	0	2.35698e-42	2.10474e-35	6368.39	12162.9	0.073594	0.0808948	0.51894	0.0046515	ferritin, heavy polypeptide 1	NM_002032.2
GMEB1	PH_hs_0000447	219	228	463	514	3.32034e-05	2.93223e-05	4.56754e-06	3.66058e-06	0	0	0	0	1.66282e-22	2.38246e-22	223.83	488.413	0.103199	0.103593	0.51889	0.0158195	glucocorticoid modulatory element binding protein 1	NM_024482.2,NM_006582.3
DCTN6	PH_hs_0022731	993	1375	2303	2585	1.22491e-06	8.45642e-07	5.59143e-07	5.21455e-07	0	0	0	0	1.14716e-14	5.1579e-24	1177.41	2443.52	0.131011	0.0996158	0.518865	0.0190924	dynactin 6	NM_006571.3
KRTCAP3	PH_hs_0046303	160	204	385	388	8.9993e-05	0.0244653	6.99278e-06	1.62283e-05	0	0	0	0	3.37424e-08	1.87035e-33	181.354	386.5	0.185263	0.0833629	0.518277	0.119303	keratinocyte associated protein 3	NM_173853.3,NM_001168364.1
KARS	PH_hs_0043666	9861	15218	22415	23724	3.37252e-07	3.18582e-07	3.08914e-07	3.06816e-07	0	0	0	0	5.27099e-11	1.62223e-33	12437	23067.4	0.154824	0.0832812	0.51812	0.0423334	lysyl-tRNA synthetase	NM_001130089.1,NM_005548.2
BCL7A	PH_hs_0061779	100	105	204	221	0.000430671	0.000380054	4.13604e-05	3.23884e-05	0	0	0	0	1.4339e-17	6.05326e-21	102.63	212.472	0.118318	0.107345	0.517977	0.0206776	B-cell CLL/lymphoma 7A	NM_001024808.1,NM_020993.3
CSRP2	PH_hs_0045700	1170	1323	2516	2660	1.00397e-06	8.79305e-07	5.29699e-07	5.13151e-07	0	0	0	0	3.7819e-36	1.29012e-32	1245.78	2587.77	0.0800067	0.0844967	0.517723	0.00206666	cysteine and glycine-rich protein 2	NM_001321.1
EDC4	PH_hs_0004362	378	473	807	1026	7.30903e-06	4.35741e-06	1.6382e-06	1.17543e-06	0	0	0	0	1.71337e-19	3.81799e-14	424.187	916.111	0.111681	0.133753	0.517701	0.0320401	enhancer of mRNA decapping 4	NM_014329.4
ATG16L1	PH_hs_0025110	302	458	760	863	1.30577e-05	4.68241e-06	1.79749e-06	1.27016e-05	0	0	0	0	2.53428e-10	8.47462e-20	377.052	811.322	0.16085	0.110725	0.517623	0.0723022	autophagy related 16-like 1 (S. cerevisiae)	NM_001190267.1,NM_001190266.1,NM_198890.2,NM_030803.6,NM_017974.3
SEPHS2	PH_hs_0029120	1221	1496	2843	2753	9.57318e-07	7.79938e-07	5.13893e-07	1.02887e-06	0	0	0	0	6.52228e-24	1.582e-33	1355.01	2798.2	0.0998463	0.0832668	0.517331	0.00581128	selenophosphate synthetase 2	NM_012248.2
CD2BP2	PH_hs_0043595	926	1122	2149	2126	1.34397e-06	1.05363e-06	5.84942e-07	5.89201e-07	0	0	0	0	1.01697e-24	1.32104e-38	1021.65	2137.57	0.098063	0.0772739	0.517175	0.00398064	CD2 (cytoplasmic tail) binding protein 2	NM_001243646.1,NM_006110.2
PEX26	PH_hs_0044339	115	101	222	230	0.00027048	0.000417593	3.18621e-05	2.85721e-05	0	0	0	0	2.89543e-10	3.92169e-26	108.617	225.988	0.161394	0.0951556	0.5169	0.0805122	peroxisomal biogenesis factor 26	NM_001199319.1,NM_001127649.2,NM_017929.5
IL22RA2	PH_hs_0007247	179	94	282	301	6.24581e-05	0.000537461	1.58194e-05	1.31814e-05	0	0	0	0	0.000168642	2.7867e-24	138.959	291.469	0.278952	0.0990184	0.516683	0.306263	interleukin 22 receptor, alpha 2	NM_052962.2,NM_181310.1,NM_181309.1
AFTPH	PH_hs_0000824	172	213	398	438	7.1254e-05	5.89052e-05	6.47414e-06	5.17402e-06	0	0	0	0	6.96441e-17	1.1058e-22	191.955	417.932	0.120987	0.102758	0.516672	0.0163732	aftiphilin	NM_203437.3,NM_017657.4,NM_001002243.2
ZNF146	PH_hs_0015567	627	661	1302	1448	2.49008e-06	2.2673e-06	9.20943e-07	8.04177e-07	0	0	0	0	1.35549e-29	1.99039e-24	644.751	1374.75	0.0889989	0.0986964	0.516598	0.00966914	zinc finger protein 146	NM_007145.2,NM_001099639.1,NM_001099638.1
MURC	PH_hs_0042548	70	75	134	148	0.00137587	0.0011294	0.313332	0.293889	-50	0	0	0	5.13479e-16	0.0797457	72.5553	140.976	0.124632	0.710841	0.516478	0.693331	muscle-related coiled-coil protein	NM_001018116.1
COPS2	PH_hs_0002595	597	852	1484	1554	2.72524e-06	2.55942e-06	7.85793e-07	7.53441e-07	0	0	0	0	9.17829e-13	1.57268e-33	719.938	1518.89	0.141916	0.0832634	0.516429	0.0277592	COP9 constitutive photomorphogenic homolog subunit 2 (Arabidopsis)	NM_001143887.1,NM_004236.3
PLAGL2	PH_hs_0009274	744	818	1664	1639	1.86015e-06	1.60502e-06	7.1162e-07	7.5429e-07	0	0	0	0	1.62183e-38	5.39374e-37	781.093	1651.57	0.0773681	0.0790335	0.516311	0.00595922	pleiomorphic adenoma gene-like 2	NM_002657.3
ZNF23	PH_hs_0043134	125	127	238	300	0.000204298	0.000193664	2.57806e-05	1.34551e-05	0	0	0	0	6.46101e-17	8.76252e-13	126.263	268.89	0.120856	0.141786	0.516236	0.0532312	zinc finger protein 23	NM_145911.1
HERC4	PH_hs_0043808	3296	3624	6655	6913	4.60467e-07	4.4182e-07	3.64057e-07	3.60877e-07	0	0	0	0	7.88931e-43	5.49412e-37	3460.41	6783.62	0.073164	0.0790426	0.516219	0.00237027	HECT and RLD domain containing E3 ubiquitin protein ligase 4	NM_015601.3,NM_022079.2
LBH	PH_hs_0003682	944	1022	2071	2053	1.31355e-06	1.18075e-06	5.99972e-07	6.03625e-07	0	0	0	0	4.94756e-36	5.08024e-39	983.495	2062.06	0.0801438	0.0768392	0.516131	0.0067278	limb bud and heart development	NM_030915.3
EPS15	PH_hs_0027703	53	100	157	216	0.00322133	0.000430844	0.0203216	3.48292e-05	-50	0	0	0	2.59765e-05	4.45958e-07	75.5176	186.394	0.247117	0.203496	0.516068	0.197991	epidermal growth factor receptor pathway substrate 15	NM_001159969.1,NM_001981.2
IQCJ-SCHIP1|SCHIP1	PH_hs_0062160	1366	1527	2875	3085	8.51207e-07	7.65467e-07	4.92128e-07	4.75018e-07	0	0	0	0	3.43782e-39	3.16857e-30	1446.07	2979.66	0.0766636	0.0879992	0.515934	0.00310324	IQCJ-SCHIP1 readthrough|schwannomin interacting protein 1	NM_001197114.1,NM_001197113.1|NM_001197109.1,NM_001197108.1,NM_001197107.1,NM_014575.3
TMEM183A|TMEM183B	PH_hs_0027444	407	602	887	1285	6.11858e-06	2.68283e-06	1.42763e-06	9.61353e-07	0	0	0	0	2.44781e-11	7.97804e-10	500.889	1085.29	0.152113	0.165717	0.515839	0.103268	transmembrane protein 183A|transmembrane protein 183B	NM_138391.4|NM_001079809.1
OR5M11	PH_hs_0044447	109	83	193	204	0.000323579	0.000804301	4.92386e-05	4.1284e-05	0	0	0	0	2.93958e-07	7.35448e-23	96.8868	198.483	0.200194	0.102323	0.515803	0.145465	olfactory receptor, family 5, subfamily M, member 11	NM_001005245.1
EPAS1	PH_hs_0048613	1903	1973	3697	4203	6.37842e-07	6.21021e-07	4.38089e-07	4.16883e-07	0	0	0	0	1.11047e-29	6.22566e-23	1941.06	3949.13	0.0888597	0.102147	0.515683	0.0142705	endothelial PAS domain protein 1	NM_001430.4
UTP3	PH_hs_0016082	145	217	336	447	0.000124621	3.41255e-05	9.83607e-06	4.93534e-06	0	0	0	0	1.30159e-09	1.70855e-11	179.653	391.302	0.16793	0.150889	0.515643	0.112983	UTP3, small subunit (SSU) processome component, homolog (S. cerevisiae)	NM_020368.2
SBF1	PH_hs_0040101	99	101	187	227	0.000446379	0.000417479	5.44356e-05	4.02045e-05	0	0	0	0	1.10487e-15	1.59093e-13	100.198	206.929	0.12612	0.137241	0.515354	0.0468833	SET binding factor 1	NM_002972.2
TCF7L2	PH_hs_0043809	152	230	368	455	0.000107186	2.87725e-05	7.81189e-06	4.74301e-06	0	0	0	0	1.90609e-09	1.86982e-14	189.529	411.346	0.169718	0.132105	0.515156	0.096275	transcription factor 7-like 2 (T-cell specific, HMG-box)	NM_001198531.1,NM_001198530.1,NM_001198529.1,NM_001198528.1,NM_001198527.1,NM_001198526.1,NM_001198525.1,NM_001146274.1,NM_030756.4,NM_001146286.1,NM_001146285.1,NM_001146284.1,NM_001146283.1
CARS	PH_hs_0023636	948	1258	2294	2413	0.0557569	9.26844e-07	5.60415e-07	5.43098e-07	0	0	0	0	2.67747e-07	1.95612e-33	1098.01	2353.31	0.199476	0.0833888	0.514835	0.11382	cysteinyl-tRNA synthetase	NM_001194997.1,NM_001751.5,NM_001014437.2,NM_139273.3,NR_036542.1
RREB1	PH_hs_0045828	626	547	1194	1319	2.50203e-06	3.22414e-06	1.15315e-06	8.81954e-07	0	0	0	0	1.28292e-13	5.48993e-25	589.926	1256.29	0.136698	0.0974921	0.514786	0.054688	ras responsive element binding protein 1	NM_001003700.1,NM_001168344.1,NM_001003699.3,NM_001003698.3
HIST1H3G	PH_hs_0029487	68	88	167	170	0.00150684	0.000659534	7.82332e-05	7.3842e-05	-50	0	0	0	4.00515e-11	9.93511e-26	77.6948	168.497	0.153837	0.0959594	0.514703	0.0231541	histone cluster 1, H3g	NM_003534.2
AKIRIN2	PH_hs_0022994	1909	2210	4190	4119	7.3807e-07	5.74126e-07	4.17801e-07	4.19985e-07	0	0	0	0	2.00595e-32	4.8565e-38	2057.1	4154.69	0.0847624	0.077878	0.513543	0.00298579	akirin 2	NM_018064.3
RIPPLY1	PH_hs_0016470	136	87	223	247	0.000154008	0.000683558	4.53231e-05	2.31439e-05	0	0	0	0	1.33249e-05	2.50893e-19	112.999	234.959	0.238075	0.11221	0.513507	0.234435	ripply1 homolog (zebrafish)	NM_138382.2,NM_001171706.1
C22orf28	PH_hs_0023368	7017	8202	13993	14742	3.5967e-07	5.40104e-06	3.21514e-07	3.1966e-07	0	0	0	0	9.12854e-29	2.53552e-34	7598.83	14366.3	0.0903635	0.0822363	0.513306	0.00247329	chromosome 22 open reading frame 28	NM_014306.4
RAF1	PH_hs_0039978	1388	2019	3239	3643	8.37813e-07	6.53497e-07	4.64162e-07	4.40769e-07	0	0	0	0	1.08252e-12	5.14547e-24	1691.99	3440.31	0.142381	0.0996134	0.513263	0.0320417	v-raf-1 murine leukemia viral oncogene homolog 1	NM_002880.3
HIPK1	PH_hs_0028764	280	203	516	539	1.61248e-05	5.49509e-05	3.65334e-06	0.163246	0	0	0	0	1.04521e-07	0.000132606	244.02	527.465	0.192637	0.27419	0.513229	0.297955	homeodomain interacting protein kinase 1	NM_152696.3
TMEM87B	PH_hs_0002054	291	317	646	668	1.44681e-05	1.66817e-05	2.36054e-06	2.22591e-06	0	0	0	0	5.57448e-30	3.28226e-33	304.106	656.969	0.0883837	0.0836884	0.513053	0.00711582	transmembrane protein 87B	NM_032824.2
POLR2C	PH_hs_0004600	3252	4155	6919	7445	4.63366e-07	4.18637e-07	3.60987e-07	3.60898e-07	0	0	0	0	1.38883e-20	2.59769e-30	3690.17	7181.13	0.108375	0.0878652	0.512991	0.00666093	polymerase (RNA) II (DNA directed) polypeptide C, 33kDa	NM_032940.2
UBQLN1	PH_hs_0000988	147	219	368	417	0.000119459	3.3154e-05	7.81483e-06	5.7874e-06	0	0	0	0	9.73651e-10	8.24776e-20	181.658	392.415	0.166607	0.110688	0.512822	0.0809244	ubiquilin 1	NM_053067.2,NM_013438.4
CD276	PH_hs_0047961	507	583	675	1239	3.76099e-06	2.84961e-06	0.190106	9.42153e-07	0	0	0	0	6.1227e-30	0.00264813	544.457	955.979	0.0884481	0.358624	0.5128	0.262198	CD276 molecule	NM_001024736.1,NM_025240.2
MED1	PH_hs_0048827	233	363	584	686	2.84467e-05	8.33179e-06	2.85793e-06	2.12737e-06	0	0	0	0	2.19143e-09	3.10436e-18	295.497	634.822	0.170385	0.115893	0.512759	0.0779657	mediator complex subunit 1	NM_004774.3
LCE2C|LCE2D|LCE2B|LCE2A	PH_hs_0030417	76	97	160	190	0.00136659	0.000477679	9.03123e-05	5.1628e-05	0	0	0	0	7.46556e-12	3.93532e-14	86.1909	174.947	0.14818	0.133825	0.512577	0.0692754	late cornified envelope 2C|late cornified envelope 2D|late cornified envelope 2B|late cornified envelope 2A	NM_178429.2|NM_178430.2|NM_014357.4|NM_178428.3
PAPPA	PH_hs_0030277	99	128	229	244	0.000449101	0.000188799	2.89543e-05	2.39542e-05	0	0	0	0	9.55879e-13	3.27668e-23	113.058	236.476	0.14203	0.101476	0.512497	0.0491022	pregnancy-associated plasma protein A, pappalysin 1	NM_002581.3
CLIC4	PH_hs_0002204	7124	7872	13818	14549	3.58704e-07	3.51045e-07	3.21978e-07	3.2012e-07	0	0	0	0	5.60519e-45	1.9499e-34	7497.96	14182.4	0.0713592	0.0820916	0.512452	0.00337836	chloride intracellular channel 4	NM_013943.2
PCF11	PH_hs_0006959	847	796	1717	1739	8.38767e-06	1.6731e-06	6.98651e-07	2.51126e-06	0	0	0	0	4.53522e-17	4.25947e-39	824.811	1727.98	0.120245	0.0767598	0.512073	0.0363408	PCF11, cleavage and polyadenylation factor subunit, homolog (S. cerevisiae)	NM_015885.3
[truncated: 13,230 more rows]
